# Supplementary material for: Dynamic molecular evolution of a supergene with suppressed recombination in white-throated sparrows
Source: eLife. 2022 Aug 30;11:e79387. doi: 10.7554/eLife.79387 (PMC9427109; doi:10.7554/eLife.79387)
Supplement: Figure 2—source data 5. [file elife-79387-fig2-data5.txt]

chrom	type	num_minor_allele	count	freqency
ZAL2	synonymous	1	2627	0.541984732824427
ZAL2	synonymous	2	665	0.137198266969259
ZAL2	synonymous	3	327	0.0674644109758614
ZAL2	synonymous	4	230	0.0474520321848566
ZAL2	synonymous	5	145	0.0299154115948009
ZAL2	synonymous	6	98	0.0202186919744172
ZAL2	synonymous	7	87	0.0179492469568805
ZAL2	synonymous	8	74	0.0152671755725191
ZAL2	synonymous	9	76	0.0156798019393439
ZAL2	synonymous	10	65	0.0134103569218073
ZAL2	synonymous	11	52	0.0107282855374458
ZAL2	synonymous	12	50	0.010315659170621
ZAL2	synonymous	13	31	0.00639570868578502
ZAL2	synonymous	14	44	0.00907778007014648
ZAL2	synonymous	15	47	0.00969671962038374
ZAL2	synonymous	16	31	0.00639570868578502
ZAL2	synonymous	17	23	0.00474520321848566
ZAL2	synonymous	18	33	0.00680833505260986
ZAL2	synonymous	19	26	0.00536414276872292
ZAL2	synonymous	20	24	0.00495151640189808
ZAL2	synonymous	21	25	0.0051578295853105
ZAL2	synonymous	22	21	0.00433257685166082
ZAL2	synonymous	23	28	0.00577676913554776
ZAL2	synonymous	24	18	0.00371363730142356
ZAL2	nonsynonymous	1	2434	0.670523415977961
ZAL2	nonsynonymous	2	424	0.116804407713499
ZAL2	nonsynonymous	3	184	0.0506887052341598
ZAL2	nonsynonymous	4	113	0.031129476584022
ZAL2	nonsynonymous	5	57	0.015702479338843
ZAL2	nonsynonymous	6	63	0.0173553719008264
ZAL2	nonsynonymous	7	39	0.0107438016528926
ZAL2	nonsynonymous	8	47	0.0129476584022039
ZAL2	nonsynonymous	9	31	0.00853994490358127
ZAL2	nonsynonymous	10	24	0.00661157024793388
ZAL2	nonsynonymous	11	24	0.00661157024793388
ZAL2	nonsynonymous	12	14	0.00385674931129477
ZAL2	nonsynonymous	13	28	0.00771349862258953
ZAL2	nonsynonymous	14	23	0.00633608815426997
ZAL2	nonsynonymous	15	12	0.00330578512396694
ZAL2	nonsynonymous	16	15	0.00413223140495868
ZAL2	nonsynonymous	17	16	0.00440771349862259
ZAL2	nonsynonymous	18	16	0.00440771349862259
ZAL2	nonsynonymous	19	15	0.00413223140495868
ZAL2	nonsynonymous	20	9	0.00247933884297521
ZAL2	nonsynonymous	21	11	0.00303030303030303
ZAL2	nonsynonymous	22	8	0.00220385674931129
ZAL2	nonsynonymous	23	10	0.00275482093663912
ZAL2	nonsynonymous	24	13	0.00358126721763085
ZAL2m	synonymous	1	361	0.656363636363636
ZAL2m	synonymous	2	47	0.0854545454545454
ZAL2m	synonymous	3	52	0.0945454545454545
ZAL2m	synonymous	4	7	0.0127272727272727
ZAL2m	synonymous	5	11	0.02
ZAL2m	synonymous	6	5	0.00909090909090909
ZAL2m	synonymous	7	7	0.0127272727272727
ZAL2m	synonymous	8	6	0.0109090909090909
ZAL2m	synonymous	9	1	0.00181818181818182
ZAL2m	synonymous	10	7	0.0127272727272727
ZAL2m	synonymous	11	2	0.00363636363636364
ZAL2m	synonymous	12	5	0.00909090909090909
ZAL2m	synonymous	13	6	0.0109090909090909
ZAL2m	synonymous	14	1	0.00181818181818182
ZAL2m	synonymous	15	2	0.00363636363636364
ZAL2m	synonymous	16	3	0.00545454545454545
ZAL2m	synonymous	17	2	0.00363636363636364
ZAL2m	synonymous	18	5	0.00909090909090909
ZAL2m	synonymous	19	11	0.02
ZAL2m	synonymous	20	3	0.00545454545454545
ZAL2m	synonymous	21	5	0.00909090909090909
ZAL2m	synonymous	22	0	0
ZAL2m	synonymous	23	0	0
ZAL2m	synonymous	24	0	0
ZAL2m	nonsynonymous	1	601	0.770512820512821
ZAL2m	nonsynonymous	2	44	0.0564102564102564
ZAL2m	nonsynonymous	3	50	0.0641025641025641
ZAL2m	nonsynonymous	4	12	0.0153846153846154
ZAL2m	nonsynonymous	5	6	0.00769230769230769
ZAL2m	nonsynonymous	6	3	0.00384615384615385
ZAL2m	nonsynonymous	7	7	0.00897435897435897
ZAL2m	nonsynonymous	8	2	0.00256410256410256
ZAL2m	nonsynonymous	9	3	0.00384615384615385
ZAL2m	nonsynonymous	10	6	0.00769230769230769
ZAL2m	nonsynonymous	11	8	0.0102564102564103
ZAL2m	nonsynonymous	12	2	0.00256410256410256
ZAL2m	nonsynonymous	13	5	0.00641025641025641
ZAL2m	nonsynonymous	14	2	0.00256410256410256
ZAL2m	nonsynonymous	15	4	0.00512820512820513
ZAL2m	nonsynonymous	16	4	0.00512820512820513
ZAL2m	nonsynonymous	17	0	0
ZAL2m	nonsynonymous	18	12	0.0153846153846154
ZAL2m	nonsynonymous	19	2	0.00256410256410256
ZAL2m	nonsynonymous	20	4	0.00512820512820513
ZAL2m	nonsynonymous	21	2	0.00256410256410256
ZAL2m	nonsynonymous	22	1	0.00128205128205128
ZAL2m	nonsynonymous	23	0	0
ZAL2m	nonsynonymous	24	0	0
