# Supplementary material for: Dynamic molecular evolution of a supergene with suppressed recombination in white-throated sparrows
Source: eLife. 2022 Aug 30;11:e79387. doi: 10.7554/eLife.79387 (PMC9427109; doi:10.7554/eLife.79387)
Supplement: Figure 2—source data 7. [file elife-79387-fig2-data7.txt]

gene_name	CHROM	Start	End	Group	Tissue	RNAseqBatch	baseMean_ASE	log2FoldChange_ASE	lfcSE_ASE	stat_ASE	pvalue_ASE	padj_ASE	SigList_ASE	baseMean	log2FoldChange	lfcSE	stat	pvalue	padj	SigList	length	Nonsense_effect_count	Non_Synonymous_effect_count	Synonymous_effect_count	Promoter_overlap_count	ZAL2m_Hvalue	ZAL2m_empirical_pvalue	ZAL2_Hvalue	ZAL2_empirical_pvalue
AARS2	NW_005081620.1	536276	552865	Adult Female	Hyp	Adult Female Brain	742.0541886	-1.008266343	0.086297082	134.8657318	3.53e-31	2.18e-29	Sig	3055.801473	-0.348401299	0.089360018	15.27387599	9.3e-05	0.023049169	Sig	16589	NA	1	3	1	123602	0.052503409	15970	0.550675676
AARS2	NW_005081620.1	536276	552865	Adult Female	AMV	Adult Female Brain	775.9423636	-1.290197437	0.086463244	218.4234116	2e-49	1.79e-47	Sig	3460.280577	-0.507417097	0.096859361	27.59465253	1.5e-07	9.76e-05	Sig	16589	NA	1	3	1	123602	0.052503409	15970	0.550675676
AARS2	NW_005081620.1	536276	552865	Adult Male	Heart	Adult Male Horton et al	225.7807615	-0.407347656	0.093675665	18.55839833	1.65e-05	5.18e-05	Sig	NA	NA	NA	NA	NA	NA	NA	16589	NA	1	3	1	123602	0.052503409	15970	0.550675676
AARS2	NW_005081620.1	536276	552865	Adult Male	Liver	Adult Male Horton et al	214.8897135	-1.198268164	0.086916032	185.3190586	3.34e-42	1.41e-40	Sig	NA	NA	NA	NA	NA	NA	NA	16589	NA	1	3	1	123602	0.052503409	15970	0.550675676
AARS2	NW_005081620.1	536276	552865	Adult Male	Hyp	Adult Male Brain	282.3817718	-0.990561576	0.073345656	182.4035301	1.45e-41	7.25e-40	Sig	1309.174479	-0.47128998	0.050198641	88.30827053	5.6e-21	1.1e-17	Sig	16589	NA	1	3	1	123602	0.052503409	15970	0.550675676
AARS2	NW_005081620.1	536276	552865	Adult Male	AMV	Adult Male Brain	295.3981666	-1.297879271	0.077565054	279.5213971	9.55e-63	9.99e-61	Sig	1357.114973	-0.500604042	0.045414834	121.6385098	2.77e-28	1.31e-24	Sig	16589	NA	1	3	1	123602	0.052503409	15970	0.550675676
AARS2	NW_005081620.1	536276	552865	Nestling Female	Hyp	Nestling Female Brain	638.7635315	-0.937038221	0.061825528	228.7301948	1.13e-51	1.17e-49	Sig	2722.862159	-0.435115576	0.105982407	16.79172184	4.17e-05	0.011337624	Sig	16589	NA	1	3	1	123602	0.052503409	15970	0.550675676
AARS2	NW_005081620.1	536276	552865	Nestling Female	AMV	Nestling Female Brain	716.5049519	-1.181926594	0.07943577	217.8180999	2.71e-49	4.67e-47	Sig	2837.169664	-0.442388946	0.098437496	20.25282217	6.79e-06	0.005819418	Sig	16589	NA	1	3	1	123602	0.052503409	15970	0.550675676
AARS2	NW_005081620.1	536276	552865	Nestling Male	Hyp	Nestling Male Brain	580.9267061	-0.809261987	0.112196458	51.11620049	8.71e-13	2.16e-11	Sig	2646.331308	-0.383792524	0.117317011	10.55729297	0.001157306	0.153323037	Not Sig	16589	NA	1	3	1	123602	0.052503409	15970	0.550675676
AARS2	NW_005081620.1	536276	552865	Nestling Male	AMV	Nestling Male Brain	639.8693427	-0.940956926	0.09593361	94.93461114	1.97e-22	1.13e-20	Sig	2757.605976	-0.454271424	0.147342587	9.298939111	0.002292866	0.302006027	Not Sig	16589	NA	1	3	1	123602	0.052503409	15970	0.550675676
ABCB10	NW_005081653.1	498650	521597	Adult Female	Hyp	Adult Female Brain	216.569094	-0.463536178	0.167419556	7.593518979	0.00585785	0.01871307	Sig	1017.453965	-0.190057285	0.099344705	3.670973384	0.05536784	0.858665496	Not Sig	22947	NA	1	3	30	96664.3	0.225534126	14726.76667	0.578828829
ABCB10	NW_005081653.1	498650	521597	Adult Female	AMV	Adult Female Brain	137.5789678	-1.080680324	0.22887201	21.59904966	3.36e-06	1.89e-05	Sig	717.2295135	-0.447852093	0.115623571	15.08125033	0.000102981	0.018164795	Sig	22947	NA	1	3	30	96664.3	0.225534126	14726.76667	0.578828829
ABCB10	NW_005081653.1	498650	521597	Adult Male	Heart	Adult Male Horton et al	171.5837184	-0.711557955	0.060970571	136.1651131	1.84e-31	3.05e-30	Sig	NA	NA	NA	NA	NA	NA	NA	22947	NA	1	3	30	96664.3	0.225534126	14726.76667	0.578828829
ABCB10	NW_005081653.1	498650	521597	Adult Male	Liver	Adult Male Horton et al	55.23041478	-3.294680447	0.609863917	18.9331477	1.35e-05	5.42e-05	Sig	NA	NA	NA	NA	NA	NA	NA	22947	NA	1	3	30	96664.3	0.225534126	14726.76667	0.578828829
ABCB10	NW_005081653.1	498650	521597	Adult Male	Hyp	Adult Male Brain	97.94428037	-0.505948656	0.130481327	14.91819964	0.000112275	0.000410114	Sig	514.6664119	-0.332837904	0.068674754	23.51809171	1.24e-06	0.000282757	Sig	22947	NA	1	3	30	96664.3	0.225534126	14726.76667	0.578828829
ABCB10	NW_005081653.1	498650	521597	Adult Male	AMV	Adult Male Brain	70.67238082	-1.02725628	0.151375636	45.79153228	1.32e-11	1.09e-10	Sig	367.1363775	-0.518719442	0.076930603	45.54381014	1.49e-11	1.12e-08	Sig	22947	NA	1	3	30	96664.3	0.225534126	14726.76667	0.578828829
ABCB10	NW_005081653.1	498650	521597	Nestling Female	Hyp	Nestling Female Brain	226.289869	0.005993853	0.140072459	0.001795946	0.966196887	0.975835715	Not Sig	1056.672637	-0.03117013	0.084638633	0.135741766	0.712551517	0.99229163	Not Sig	22947	NA	1	3	30	96664.3	0.225534126	14726.76667	0.578828829
ABCB10	NW_005081653.1	498650	521597	Nestling Female	AMV	Nestling Female Brain	189.6058588	-0.627882419	0.144924321	18.56558731	1.64e-05	8.76e-05	Sig	853.5729394	-0.397085768	0.159952427	6.184588613	0.012886766	0.978588788	Not Sig	22947	NA	1	3	30	96664.3	0.225534126	14726.76667	0.578828829
ABCB10	NW_005081653.1	498650	521597	Nestling Male	Hyp	Nestling Male Brain	234.7835075	0.126932519	0.162922617	0.598203607	0.439264254	0.639302036	Not Sig	1144.451965	-0.103311772	0.084707967	1.483773652	0.223185032	0.995064234	Not Sig	22947	NA	1	3	30	96664.3	0.225534126	14726.76667	0.578828829
ABCB10	NW_005081653.1	498650	521597	Nestling Male	AMV	Nestling Male Brain	201.2429238	-0.614279032	0.194728797	9.74026438	0.00180275	0.007014458	Sig	917.1362139	-0.237769202	0.148597716	2.533238294	0.111471239	0.640464519	Not Sig	22947	NA	1	3	30	96664.3	0.225534126	14726.76667	0.578828829
ABCC10	NW_005081574.1	3886189	3903757	Adult Female	Hyp	Adult Female Brain	366.1294682	-0.383594604	0.116468579	10.82617538	0.001000751	0.003810832	Sig	1628.740561	0.008655811	0.1685645	0.002636185	0.959051571	0.998912819	Not Sig	17568	NA	6	6	11	70272.2	0.697447887	11617.3	0.29140625
ABCC10	NW_005081574.1	3886189	3903757	Adult Female	AMV	Adult Female Brain	230.954126	-0.40190368	0.182251689	4.785802003	0.028695282	0.070847662	Not Sig	949.3524651	0.034386706	0.164862771	0.043474608	0.834834168	0.992913561	Not Sig	17568	NA	6	6	11	70272.2	0.697447887	11617.3	0.29140625
ABCC10	NW_005081574.1	3886189	3903757	Adult Male	Heart	Adult Male Horton et al	11.11320237	-1.805227954	0.665143093	4.163387854	0.041306705	0.07291898	Not Sig	NA	NA	NA	NA	NA	NA	NA	17568	NA	6	6	11	70272.2	0.697447887	11617.3	0.29140625
ABCC10	NW_005081574.1	3886189	3903757	Adult Male	Liver	Adult Male Horton et al	37.08014937	-0.182687515	0.240718396	0.535305273	0.464384912	0.600926878	Not Sig	NA	NA	NA	NA	NA	NA	NA	17568	NA	6	6	11	70272.2	0.697447887	11617.3	0.29140625
ABCC10	NW_005081574.1	3886189	3903757	Adult Male	Hyp	Adult Male Brain	131.6042438	-0.301826717	0.307153479	0.896399199	0.343749057	0.483121773	Not Sig	732.1415413	-0.381691984	0.108601411	12.36858366	0.000436619	0.03912446	Sig	17568	NA	6	6	11	70272.2	0.697447887	11617.3	0.29140625
ABCC10	NW_005081574.1	3886189	3903757	Adult Male	AMV	Adult Male Brain	66.78983675	-0.267362523	0.354787418	0.517684373	0.471831137	0.622600144	Not Sig	365.4334322	-0.457192807	0.139251602	10.7906337	0.00102015	0.089415922	Not Sig	17568	NA	6	6	11	70272.2	0.697447887	11617.3	0.29140625
ABCC10	NW_005081574.1	3886189	3903757	Nestling Female	Hyp	Nestling Female Brain	505.556532	0.074918554	0.100385621	0.550502111	0.458112605	0.590140088	Not Sig	2235.710526	0.126432879	0.077897237	2.633463386	0.10463325	0.740872605	Not Sig	17568	NA	6	6	11	70272.2	0.697447887	11617.3	0.29140625
ABCC10	NW_005081574.1	3886189	3903757	Nestling Female	AMV	Nestling Female Brain	413.648672	-0.233409504	0.126186227	3.38645798	0.065734018	0.13185021	Not Sig	1806.427316	-0.014430924	0.169952981	0.007215839	0.932304245	0.996634902	Not Sig	17568	NA	6	6	11	70272.2	0.697447887	11617.3	0.29140625
ABCC10	NW_005081574.1	3886189	3903757	Nestling Male	Hyp	Nestling Male Brain	488.7990567	0.131357044	0.096361802	1.854624975	0.173246439	0.325358003	Not Sig	2372.940147	-0.008376439	0.123941686	0.004600983	0.945920527	1	Not Sig	17568	NA	6	6	11	70272.2	0.697447887	11617.3	0.29140625
ABCC10	NW_005081574.1	3886189	3903757	Nestling Male	AMV	Nestling Male Brain	422.0461348	-0.131749735	0.142222164	0.848461928	0.356987815	0.535481723	Not Sig	1819.637173	-0.092360003	0.131670319	0.490131736	0.483868546	0.856265317	Not Sig	17568	NA	6	6	11	70272.2	0.697447887	11617.3	0.29140625
ABCG5	NW_005081548.1	7173910	7189990	Adult Female	Hyp	Adult Female Brain	9.588218268	0.621953213	0.685025908	0.809311057	0.368324015	0.557793285	Not Sig	19.21449855	0.26519431	0.399963463	0.440792541	0.506740177	0.998912819	Not Sig	16080	NA	1	2	6	94127.1	0.25676992	8527.18	0.71953125
ABCG5	NW_005081548.1	7173910	7189990	Adult Female	AMV	Adult Female Brain	8.122217869	0.290201056	0.999520413	0.073078913	0.786905529	0.874367827	Not Sig	16.0266124	1.313949387	0.772495178	2.76030216	0.096629985	0.747710244	Not Sig	16080	NA	1	2	6	94127.1	0.25676992	8527.18	0.71953125
ABCG5	NW_005081548.1	7173910	7189990	Adult Male	Heart	Adult Male Horton et al	0.125305404	0.167502128	2.956790113	0.005718779	0.93971935	100	Not Sig	NA	NA	NA	NA	NA	NA	NA	16080	NA	1	2	6	94127.1	0.25676992	8527.18	0.71953125
ABCG5	NW_005081548.1	7173910	7189990	Adult Male	Liver	Adult Male Horton et al	273.2358643	0.253729073	0.075484039	11.19523339	0.000820077	0.002365069	Sig	NA	NA	NA	NA	NA	NA	NA	16080	NA	1	2	6	94127.1	0.25676992	8527.18	0.71953125
ABCG5	NW_005081548.1	7173910	7189990	Adult Male	Hyp	Adult Male Brain	3.043628948	0.015565078	1.457672167	7.22e-05	0.993219726	0.998717216	Not Sig	9.186436146	0.482618575	0.514511755	0.881925716	0.347674783	0.964851606	Not Sig	16080	NA	1	2	6	94127.1	0.25676992	8527.18	0.71953125
ABCG5	NW_005081548.1	7173910	7189990	Adult Male	AMV	Adult Male Brain	3.091564459	0.417268561	1.659979786	0.02997646	0.862543653	0.915031097	Not Sig	8.730453599	0.619267774	0.340106244	3.330083879	0.068023405	0.63524909	Not Sig	16080	NA	1	2	6	94127.1	0.25676992	8527.18	0.71953125
ABCG5	NW_005081548.1	7173910	7189990	Nestling Female	Hyp	Nestling Female Brain	7.827234243	2.437308342	1.09460508	3.092326482	0.078662267	0.13991899	Not Sig	11.44863614	1.271771459	0.535587911	5.558279151	0.018393486	0.389737835	Not Sig	16080	NA	1	2	6	94127.1	0.25676992	8527.18	0.71953125
ABCG5	NW_005081548.1	7173910	7189990	Nestling Female	AMV	Nestling Female Brain	7.020031118	-1.154397159	1.4746579	0.39656809	0.528866982	0.673280844	Not Sig	13.5178871	1.164418424	0.706859968	2.633609785	0.104623605	0.996634902	Not Sig	16080	NA	1	2	6	94127.1	0.25676992	8527.18	0.71953125
ABCG5	NW_005081548.1	7173910	7189990	Nestling Male	Hyp	Nestling Male Brain	6.35350636	1.246817731	1.144522893	0.791511141	0.373643581	0.580102889	Not Sig	11.83454744	1.043934781	0.77836989	1.812897008	0.178161097	0.983301781	Not Sig	16080	NA	1	2	6	94127.1	0.25676992	8527.18	0.71953125
ABCG5	NW_005081548.1	7173910	7189990	Nestling Male	AMV	Nestling Male Brain	7.909569406	0.97766386	1.090072252	0.730082087	0.392856582	0.574303054	Not Sig	15.40581952	1.868699634	0.751698798	6.259877064	0.012350277	0.48463232	Not Sig	16080	NA	1	2	6	94127.1	0.25676992	8527.18	0.71953125
ABCG8	NW_005081548.1	7192929	7203646	Adult Female	Hyp	Adult Female Brain	0.168467604	-0.599073824	3.101612445	0.055092066	0.814428399	100	Not Sig	0.829089302	-0.815152628	3.054326127	0.072652202	0.787513608	100	Not Sig	10717	NA	NA	2	6	88132.85	0.332067018	8782.885	0.68125
ABCG8	NW_005081548.1	7192929	7203646	Adult Female	AMV	Adult Female Brain	0.818865414	-1.53406529	3.068341026	0.294063858	0.587628007	100	Not Sig	2.006934802	0.359132205	2.631856187	0.018485387	0.891852132	100	Not Sig	10717	NA	NA	2	6	88132.85	0.332067018	8782.885	0.68125
ABCG8	NW_005081548.1	7192929	7203646	Adult Male	Heart	Adult Male Horton et al	0.516473665	0.400573847	2.947763925	0.027334627	0.868682776	100	Not Sig	NA	NA	NA	NA	NA	NA	NA	10717	NA	NA	2	6	88132.85	0.332067018	8782.885	0.68125
ABCG8	NW_005081548.1	7192929	7203646	Adult Male	Liver	Adult Male Horton et al	639.6015086	0.821555126	0.089494943	82.07661728	1.31e-19	1.81e-18	Sig	NA	NA	NA	NA	NA	NA	NA	10717	NA	NA	2	6	88132.85	0.332067018	8782.885	0.68125
ABCG8	NW_005081548.1	7192929	7203646	Adult Male	Hyp	Adult Male Brain	0.40077466	-0.38947779	3.027439208	0.02636711	0.871006995	100	Not Sig	1.061049945	-2.380068849	2.281155786	0.779297077	0.377356205	100	Not Sig	10717	NA	NA	2	6	88132.85	0.332067018	8782.885	0.68125
ABCG8	NW_005081548.1	7192929	7203646	Adult Male	AMV	Adult Male Brain	0.372960768	-0.389478737	3.027439212	0.026367167	0.871006856	0.915657966	Not Sig	0.283721865	1.523543785	3.031966336	0.580324419	0.446185187	100	Not Sig	10717	NA	NA	2	6	88132.85	0.332067018	8782.885	0.68125
ABCG8	NW_005081548.1	7192929	7203646	Nestling Female	Hyp	Nestling Female Brain	0.48088491	0.13245145	3.028235665	0.000415925	0.983728888	100	Not Sig	2.494364935	-0.988132258	1.516679735	0.418458997	0.517706978	100	Not Sig	10717	NA	NA	2	6	88132.85	0.332067018	8782.885	0.68125
ABCG8	NW_005081548.1	7192929	7203646	Nestling Female	AMV	Nestling Female Brain	0.103984067	-0.428100415	3.051076196	0.03094485	0.860363484	100	Not Sig	0.60458252	-1.013517973	3.029681402	0.159756815	0.68938051	100	Not Sig	10717	NA	NA	2	6	88132.85	0.332067018	8782.885	0.68125
ABCG8	NW_005081548.1	7192929	7203646	Nestling Male	Hyp	Nestling Male Brain	0.811729706	0.097162049	3.037352565	-5.55e-05	1	100	Not Sig	2.237363738	-0.167802781	2.032261674	0.006802143	0.934268912	1	Not Sig	10717	NA	NA	2	6	88132.85	0.332067018	8782.885	0.68125
ABCG8	NW_005081548.1	7192929	7203646	Nestling Male	AMV	Nestling Male Brain	0	NA	NA	NA	NA	100	Not Sig	0.768162021	-1.797632355	3.035768063	0.266503831	0.605686733	0.900180829	Not Sig	10717	NA	NA	2	6	88132.85	0.332067018	8782.885	0.68125
ABHD12	NW_005081577.1	151549	169265	Adult Female	Hyp	Adult Female Brain	2890.352079	-0.02467668	0.049700193	0.246338541	0.619665106	0.78482651	Not Sig	8756.66553	-0.087180615	0.097309715	0.803918218	0.369924463	0.998912819	Not Sig	17716	NA	1	2	15	70667.9	0.695791935	7080.14	0.8984375
ABHD12	NW_005081577.1	151549	169265	Adult Female	AMV	Adult Female Brain	4328.802254	-0.01324687	0.045642151	0.084152221	0.771747369	0.865194858	Not Sig	13413.68872	-0.126524525	0.076486312	2.74281227	0.097692702	0.747819327	Not Sig	17716	NA	1	2	15	70667.9	0.695791935	7080.14	0.8984375
ABHD12	NW_005081577.1	151549	169265	Adult Male	Heart	Adult Male Horton et al	260.7579828	0.054299071	0.089247628	0.364373094	0.546087505	0.652438801	Not Sig	NA	NA	NA	NA	NA	NA	NA	17716	NA	1	2	15	70667.9	0.695791935	7080.14	0.8984375
ABHD12	NW_005081577.1	151549	169265	Adult Male	Liver	Adult Male Horton et al	464.6872712	-1.353561743	0.085920989	238.3642596	8.94e-54	5.81e-52	Sig	NA	NA	NA	NA	NA	NA	NA	17716	NA	1	2	15	70667.9	0.695791935	7080.14	0.8984375
ABHD12	NW_005081577.1	151549	169265	Adult Male	Hyp	Adult Male Brain	1477.132215	-0.095494075	0.031404093	9.24421284	0.002362408	0.006600385	Sig	4350.803646	0.013912623	0.048777544	0.081380301	0.775435512	0.989305346	Not Sig	17716	NA	1	2	15	70667.9	0.695791935	7080.14	0.8984375
ABHD12	NW_005081577.1	151549	169265	Adult Male	AMV	Adult Male Brain	2120.777375	-0.012758779	0.039502333	0.104189794	0.746858498	0.845469685	Not Sig	6090.035887	0.098730405	0.063321812	2.427971082	0.119187074	0.716687857	Not Sig	17716	NA	1	2	15	70667.9	0.695791935	7080.14	0.8984375
ABHD12	NW_005081577.1	151549	169265	Nestling Female	Hyp	Nestling Female Brain	2021.908629	-0.084562307	0.041821018	4.084091144	0.043288726	0.085832522	Not Sig	6742.687938	-0.294640892	0.123509971	5.680999263	0.017149598	0.38189446	Not Sig	17716	NA	1	2	15	70667.9	0.695791935	7080.14	0.8984375
ABHD12	NW_005081577.1	151549	169265	Nestling Female	AMV	Nestling Female Brain	3371.912159	-0.204143733	0.066748237	9.306594373	0.002283305	0.007249144	Sig	9588.596184	0.001921348	0.103588687	0.000345985	0.98515966	0.996949916	Not Sig	17716	NA	1	2	15	70667.9	0.695791935	7080.14	0.8984375
ABHD12	NW_005081577.1	151549	169265	Nestling Male	Hyp	Nestling Male Brain	2345.103172	-0.009414707	0.060378895	0.024251582	0.876246484	0.935290437	Not Sig	7330.048341	-0.002220582	0.165819659	0.000180204	0.989289499	1	Not Sig	17716	NA	1	2	15	70667.9	0.695791935	7080.14	0.8984375
ABHD12	NW_005081577.1	151549	169265	Nestling Male	AMV	Nestling Male Brain	3733.775436	0.037259039	0.074929773	0.246077726	0.619850513	0.776689202	Not Sig	10043.13796	0.090932532	0.142863369	0.406562263	0.523719542	0.87290459	Not Sig	17716	NA	1	2	15	70667.9	0.695791935	7080.14	0.8984375
ABRACL	NW_005081611.1	3493811	3498792	Adult Female	Hyp	Adult Female Brain	64.37938612	-0.414231173	0.298728849	1.884967035	0.169770684	0.306579019	Not Sig	206.9028684	-0.425177405	0.183160007	5.41461963	0.019968804	0.61829434	Not Sig	4981	NA	2	1	7	77601.9	0.542372881	17022.5	0.405925156
ABRACL	NW_005081611.1	3493811	3498792	Adult Female	AMV	Adult Female Brain	259.7439753	-0.094623016	0.173394192	0.294105016	0.587601869	0.729282309	Not Sig	782.5328408	-0.094565106	0.146498047	0.417506369	0.518183948	0.974579963	Not Sig	4981	NA	2	1	7	77601.9	0.542372881	17022.5	0.405925156
ABRACL	NW_005081611.1	3493811	3498792	Adult Male	Heart	Adult Male Horton et al	16.36960502	-0.349398142	0.465308892	0.420160666	0.516856886	0.623544221	Not Sig	NA	NA	NA	NA	NA	NA	NA	4981	NA	2	1	7	77601.9	0.542372881	17022.5	0.405925156
ABRACL	NW_005081611.1	3493811	3498792	Adult Male	Liver	Adult Male Horton et al	95.89788833	-1.00341157	0.191622371	25.70152858	3.99e-07	2.02e-06	Sig	NA	NA	NA	NA	NA	NA	NA	4981	NA	2	1	7	77601.9	0.542372881	17022.5	0.405925156
ABRACL	NW_005081611.1	3493811	3498792	Adult Male	Hyp	Adult Male Brain	45.70526753	-0.25457315	0.185076521	1.872322227	0.171209349	0.2766701	Not Sig	173.6002493	-0.302849076	0.10348104	8.593277161	0.003374063	0.175887448	Not Sig	4981	NA	2	1	7	77601.9	0.542372881	17022.5	0.405925156
ABRACL	NW_005081611.1	3493811	3498792	Adult Male	AMV	Adult Male Brain	175.0926338	-0.288339721	0.088214675	10.66305656	0.001092966	0.003098219	Sig	633.0004159	-0.236524418	0.092876008	6.49370816	0.010825693	0.365020825	Not Sig	4981	NA	2	1	7	77601.9	0.542372881	17022.5	0.405925156
ABRACL	NW_005081611.1	3493811	3498792	Nestling Female	Hyp	Nestling Female Brain	90.21492728	-0.126778204	0.187682207	0.448311259	0.503138003	0.632753115	Not Sig	284.0106987	-0.237550309	0.147598352	2.585665436	0.107835081	0.747265798	Not Sig	4981	NA	2	1	7	77601.9	0.542372881	17022.5	0.405925156
ABRACL	NW_005081611.1	3493811	3498792	Nestling Female	AMV	Nestling Female Brain	280.1900261	-0.234804106	0.112299982	4.357331773	0.03684998	0.082487576	Not Sig	784.8473713	0.112805266	0.281638525	0.160070215	0.68909188	0.996634902	Not Sig	4981	NA	2	1	7	77601.9	0.542372881	17022.5	0.405925156
ABRACL	NW_005081611.1	3493811	3498792	Nestling Male	Hyp	Nestling Male Brain	112.8115424	0.199745958	0.202453074	0.964134106	0.326147486	0.52833037	Not Sig	339.6431784	0.125238707	0.158578526	0.625328187	0.429074162	0.995064234	Not Sig	4981	NA	2	1	7	77601.9	0.542372881	17022.5	0.405925156
ABRACL	NW_005081611.1	3493811	3498792	Nestling Male	AMV	Nestling Male Brain	277.1102214	-0.110904185	0.124482062	0.792641902	0.373302466	0.553535892	Not Sig	723.0130157	0.215433066	0.256197841	0.712305104	0.398679634	0.823722261	Not Sig	4981	NA	2	1	7	77601.9	0.542372881	17022.5	0.405925156
ACAT2	NW_005081596.1	621378	630224	Adult Female	Hyp	Adult Female Brain	793.4451738	-0.397339278	0.084876913	21.84883105	2.95e-06	1.95e-05	Sig	2568.444013	-0.121868114	0.075485568	2.611763132	0.10607377	0.967040684	Not Sig	8846	NA	1	3	5	78637	0.522306643	21225.6	0.226091476
ACAT2	NW_005081596.1	621378	630224	Adult Female	AMV	Adult Female Brain	703.6650169	-0.449026361	0.094753882	22.36441947	2.26e-06	1.34e-05	Sig	2416.263902	-0.186846662	0.091031531	4.226689988	0.039792973	0.581979001	Not Sig	8846	NA	1	3	5	78637	0.522306643	21225.6	0.226091476
ACAT2	NW_005081596.1	621378	630224	Adult Male	Heart	Adult Male Horton et al	223.3067169	0.45521616	0.05318416	73.17150924	1.19e-17	1.16e-16	Sig	NA	NA	NA	NA	NA	NA	NA	8846	NA	1	3	5	78637	0.522306643	21225.6	0.226091476
ACAT2	NW_005081596.1	621378	630224	Adult Male	Liver	Adult Male Horton et al	3584.510804	-0.209559631	0.037167052	31.68528075	1.81e-08	1.04e-07	Sig	NA	NA	NA	NA	NA	NA	NA	8846	NA	1	3	5	78637	0.522306643	21225.6	0.226091476
ACAT2	NW_005081596.1	621378	630224	Adult Male	Hyp	Adult Male Brain	337.4075652	-0.25261113	0.063373943	15.87418248	6.77e-05	0.000253438	Sig	1160.494505	-0.195538875	0.048216135	16.47991406	4.92e-05	0.006642645	Sig	8846	NA	1	3	5	78637	0.522306643	21225.6	0.226091476
ACAT2	NW_005081596.1	621378	630224	Adult Male	AMV	Adult Male Brain	296.5654615	-0.418046869	0.092248026	20.36861101	6.39e-06	2.61e-05	Sig	1009.094873	-0.127265686	0.057175255	4.964013766	0.02588007	0.500226325	Not Sig	8846	NA	1	3	5	78637	0.522306643	21225.6	0.226091476
ACAT2	NW_005081596.1	621378	630224	Nestling Female	Hyp	Nestling Female Brain	921.178939	-0.270593936	0.064250998	17.66692473	2.63e-05	0.000112769	Sig	3173.521539	-0.228994894	0.147121498	2.419961449	0.119797879	0.763346897	Not Sig	8846	NA	1	3	5	78637	0.522306643	21225.6	0.226091476
ACAT2	NW_005081596.1	621378	630224	Nestling Female	AMV	Nestling Female Brain	1371.122084	-0.355777549	0.056116159	40.09535979	2.42e-10	2.84e-09	Sig	4424.440503	-0.211997272	0.180666668	1.379938047	0.2401117	0.996634902	Not Sig	8846	NA	1	3	5	78637	0.522306643	21225.6	0.226091476
ACAT2	NW_005081596.1	621378	630224	Nestling Male	Hyp	Nestling Male Brain	993.318613	-0.232690345	0.074266252	9.790036953	0.001754599	0.007076668	Sig	3255.792611	-0.006430041	0.12278019	0.002758771	0.958111172	1	Not Sig	8846	NA	1	3	5	78637	0.522306643	21225.6	0.226091476
ACAT2	NW_005081596.1	621378	630224	Nestling Male	AMV	Nestling Male Brain	1350.888609	-0.498382374	0.077061876	41.56794375	1.14e-10	2.1e-09	Sig	4106.215478	-0.042779207	0.128585982	0.110486592	0.739590837	0.942674966	Not Sig	8846	NA	1	3	5	78637	0.522306643	21225.6	0.226091476
ACBD3	NW_005081602.1	1095404	1113963	Adult Female	Hyp	Adult Female Brain	746.062792	0.041053416	0.097637921	0.176146726	0.674705812	0.828406318	Not Sig	4810.441324	0.005025541	0.068227533	0.005444197	0.941181623	0.998912819	Not Sig	18559	NA	NA	1	33	NA	-1	NA	-1
ACBD3	NW_005081602.1	1095404	1113963	Adult Female	AMV	Adult Female Brain	740.2531199	0.128600221	0.089942201	2.041709099	0.153037616	0.284364013	Not Sig	5121.822489	-0.047812378	0.079728568	0.359948372	0.54853491	0.981988557	Not Sig	18559	NA	NA	1	33	NA	-1	NA	-1
ACBD3	NW_005081602.1	1095404	1113963	Adult Male	Heart	Adult Male Horton et al	45.89958702	0.431997723	0.127650886	11.28707185	0.000780487	0.001940003	Sig	NA	NA	NA	NA	NA	NA	NA	18559	NA	NA	1	33	NA	-1	NA	-1
ACBD3	NW_005081602.1	1095404	1113963	Adult Male	Liver	Adult Male Horton et al	57.87450304	-0.116589477	0.104638372	1.232047639	0.26700919	0.393757009	Not Sig	NA	NA	NA	NA	NA	NA	NA	18559	NA	NA	1	33	NA	-1	NA	-1
ACBD3	NW_005081602.1	1095404	1113963	Adult Male	Hyp	Adult Male Brain	246.2328048	0.188676259	0.074173122	6.461839795	0.011021547	0.026351517	Sig	NA	NA	NA	NA	NA	NA	NA	18559	NA	NA	1	33	NA	-1	NA	-1
ACBD3	NW_005081602.1	1095404	1113963	Adult Male	AMV	Adult Male Brain	253.1281332	0.00242805	0.094237446	0.000663142	0.979455517	0.990822506	Not Sig	NA	NA	NA	NA	NA	NA	NA	18559	NA	NA	1	33	NA	-1	NA	-1
ACBD3	NW_005081602.1	1095404	1113963	Nestling Female	Hyp	Nestling Female Brain	586.2883841	0.393869539	0.080677781	23.66342895	1.15e-06	6.23e-06	Sig	3911.144859	0.006261727	0.066354639	0.008913599	0.924781996	0.996896415	Not Sig	18559	NA	NA	1	33	NA	-1	NA	-1
ACBD3	NW_005081602.1	1095404	1113963	Nestling Female	AMV	Nestling Female Brain	679.6098501	-0.043716018	0.129696002	0.111945877	0.737939565	0.842080982	Not Sig	4377.328728	0.043046534	0.138301095	0.096809268	0.755692766	0.996634902	Not Sig	18559	NA	NA	1	33	NA	-1	NA	-1
ACBD3	NW_005081602.1	1095404	1113963	Nestling Male	Hyp	Nestling Male Brain	606.6505908	0.169289521	0.09255649	3.334463122	0.067842544	0.150715246	Not Sig	4242.213629	0.116367026	0.049074636	5.638279627	0.017572442	0.569732669	Not Sig	18559	NA	NA	1	33	NA	-1	NA	-1
ACBD3	NW_005081602.1	1095404	1113963	Nestling Male	AMV	Nestling Male Brain	678.3858079	0.097004409	0.109206427	0.784498251	0.375768936	0.555601212	Not Sig	4208.098578	0.017364681	0.090046112	0.037223291	0.847011139	0.97042533	Not Sig	18559	NA	NA	1	33	NA	-1	NA	-1
ACP1	NW_005081609.1	597191	617179	Adult Female	Hyp	Adult Female Brain	1971.459042	-0.307331241	0.05722266	28.78826795	8.07e-08	7.13e-07	Sig	6334.611499	0.231200685	0.079410305	8.428631106	0.003693583	0.2986023	Not Sig	19988	NA	NA	NA	14	NA	-1	NA	-1
ACP1	NW_005081609.1	597191	617179	Adult Female	AMV	Adult Female Brain	2459.716634	-0.260447095	0.054526097	22.77437224	1.82e-06	1.11e-05	Sig	7946.745232	-0.043887231	0.152781023	0.082585851	0.773823257	0.992913561	Not Sig	19988	NA	NA	NA	14	NA	-1	NA	-1
ACP1	NW_005081609.1	597191	617179	Adult Male	Heart	Adult Male Horton et al	342.9032311	0.16145257	0.047719366	11.42169577	0.000725914	0.001825336	Sig	NA	NA	NA	NA	NA	NA	NA	19988	NA	NA	NA	14	NA	-1	NA	-1
ACP1	NW_005081609.1	597191	617179	Adult Male	Liver	Adult Male Horton et al	738.7907411	0.282791123	0.039774297	50.41827305	1.24e-12	1.07e-11	Sig	NA	NA	NA	NA	NA	NA	NA	19988	NA	NA	NA	14	NA	-1	NA	-1
ACP1	NW_005081609.1	597191	617179	Adult Male	Hyp	Adult Male Brain	942.6283387	-0.157596898	0.037574301	17.58780614	2.74e-05	0.000108093	Sig	3814.617529	-0.087746766	0.058501066	2.251909543	0.133449637	0.877067183	Not Sig	19988	NA	NA	NA	14	NA	-1	NA	-1
ACP1	NW_005081609.1	597191	617179	Adult Male	AMV	Adult Male Brain	1073.678797	-0.087456774	0.04867968	3.221754824	0.072665692	0.132188371	Not Sig	4145.788286	-0.070636541	0.041940911	2.838812342	0.0920122	0.67991709	Not Sig	19988	NA	NA	NA	14	NA	-1	NA	-1
ACP1	NW_005081609.1	597191	617179	Nestling Female	Hyp	Nestling Female Brain	1851.96105	-0.144468838	0.039795179	13.16938743	0.00028456	0.000973889	Sig	6266.435772	0.011337792	0.168799889	0.004511267	0.946449577	0.996896415	Not Sig	19988	NA	NA	NA	14	NA	-1	NA	-1
ACP1	NW_005081609.1	597191	617179	Nestling Female	AMV	Nestling Female Brain	2178.161135	-0.163786877	0.058067919	7.935969774	0.004846165	0.01420901	Sig	6703.374946	0.044467102	0.130692594	0.115677464	0.733770755	0.996634902	Not Sig	19988	NA	NA	NA	14	NA	-1	NA	-1
ACP1	NW_005081609.1	597191	617179	Nestling Male	Hyp	Nestling Male Brain	2042.581752	-0.179664208	0.050115154	12.83884681	0.000339497	0.001694383	Sig	7167.475478	-0.135928713	0.115586495	1.377027697	0.240608088	0.995064234	Not Sig	19988	NA	NA	NA	14	NA	-1	NA	-1
ACP1	NW_005081609.1	597191	617179	Nestling Male	AMV	Nestling Male Brain	2538.147025	-0.234561955	0.061577905	14.47189864	0.000142266	0.000755105	Sig	7642.893551	-0.050406568	0.092987968	0.29322264	0.588162749	0.894342562	Not Sig	19988	NA	NA	NA	14	NA	-1	NA	-1
ACSS1	NW_005081577.1	414432	447854	Adult Female	Hyp	Adult Female Brain	66.02673605	1.082948288	0.286555456	13.9836831	0.000184404	0.000817758	Sig	196.3606173	0.502096921	0.212971934	5.501686608	0.018998141	0.609368102	Not Sig	33422	NA	1	1	18	91685.5	0.278005065	9953.973333	0.741248339
ACSS1	NW_005081577.1	414432	447854	Adult Female	AMV	Adult Female Brain	29.34006667	0.338417274	0.44940463	0.547651305	0.459278961	0.622307755	Not Sig	82.79138189	0.116951225	0.35482451	0.108390541	0.741983975	0.992913561	Not Sig	33422	NA	1	1	18	91685.5	0.278005065	9953.973333	0.741248339
ACSS1	NW_005081577.1	414432	447854	Adult Male	Heart	Adult Male Horton et al	219.3547484	-0.678916694	0.19274396	11.47868078	0.000703991	0.001780562	Sig	NA	NA	NA	NA	NA	NA	NA	33422	NA	1	1	18	91685.5	0.278005065	9953.973333	0.741248339
ACSS1	NW_005081577.1	414432	447854	Adult Male	Liver	Adult Male Horton et al	934.3022911	0.16419201	0.044060443	13.84086569	0.000198962	0.000634425	Sig	NA	NA	NA	NA	NA	NA	NA	33422	NA	1	1	18	91685.5	0.278005065	9953.973333	0.741248339
ACSS1	NW_005081577.1	414432	447854	Adult Male	Hyp	Adult Male Brain	20.13299373	1.468508451	0.504686882	6.749375297	0.009378051	0.02278455	Sig	58.68207831	0.852769408	0.220317535	14.80267554	0.000119366	0.01375217	Sig	33422	NA	1	1	18	91685.5	0.278005065	9953.973333	0.741248339
ACSS1	NW_005081577.1	414432	447854	Adult Male	AMV	Adult Male Brain	11.56575763	1.267729917	0.412819001	9.123331814	0.002523699	0.006632636	Sig	36.65457052	0.559170767	0.269171527	4.279098061	0.038583817	0.553872559	Not Sig	33422	NA	1	1	18	91685.5	0.278005065	9953.973333	0.741248339
ACSS1	NW_005081577.1	414432	447854	Nestling Female	Hyp	Nestling Female Brain	106.1681442	1.437904122	0.174249657	66.45661359	3.58e-16	6.18e-15	Sig	318.6093097	0.511388908	0.249196206	4.193278002	0.040584551	0.5513512	Not Sig	33422	NA	1	1	18	91685.5	0.278005065	9953.973333	0.741248339
ACSS1	NW_005081577.1	414432	447854	Nestling Female	AMV	Nestling Female Brain	56.61910216	0.730784711	0.296341844	5.880563998	0.015308917	0.038930539	Sig	184.5380344	0.406401374	0.33459366	1.463533661	0.226368714	0.996634902	Not Sig	33422	NA	1	1	18	91685.5	0.278005065	9953.973333	0.741248339
ACSS1	NW_005081577.1	414432	447854	Nestling Male	Hyp	Nestling Male Brain	142.7917251	1.783614864	0.188206059	86.84929643	1.17e-20	6.1e-19	Sig	406.6656663	0.493382878	0.25301099	3.840341552	0.050033328	0.768912186	Not Sig	33422	NA	1	1	18	91685.5	0.278005065	9953.973333	0.741248339
ACSS1	NW_005081577.1	414432	447854	Nestling Male	AMV	Nestling Male Brain	62.67035342	0.960637319	0.355486272	6.788556682	0.009174405	0.02792797	Sig	196.3526649	0.191094541	0.324646472	0.349097159	0.554624652	0.884193453	Not Sig	33422	NA	1	1	18	91685.5	0.278005065	9953.973333	0.741248339
ACTA1	NW_005081653.1	459809	461670	Adult Female	Hyp	Adult Female Brain	28.99642479	-0.046674594	0.45075629	0.010179776	0.919633912	0.963194871	Not Sig	105.038927	-0.087616513	0.272859751	0.103869084	0.747235076	0.998912819	Not Sig	1861	NA	NA	NA	2	98747.5	0.191798169	15209.35	0.536642412
ACTA1	NW_005081653.1	459809	461670	Adult Female	AMV	Adult Female Brain	10.70544936	0.193587301	1.101324123	0.016754622	0.897009778	0.931935399	Not Sig	46.33550918	0.086700793	0.413010266	0.044017801	0.833820497	0.992913561	Not Sig	1861	NA	NA	NA	2	98747.5	0.191798169	15209.35	0.536642412
ACTA1	NW_005081653.1	459809	461670	Adult Male	Heart	Adult Male Horton et al	149.9751246	-0.017088768	0.090096954	0.035553316	0.850440924	0.897111462	Not Sig	NA	NA	NA	NA	NA	NA	NA	1861	NA	NA	NA	2	98747.5	0.191798169	15209.35	0.536642412
ACTA1	NW_005081653.1	459809	461670	Adult Male	Liver	Adult Male Horton et al	0	NA	NA	NA	NA	100	Not Sig	NA	NA	NA	NA	NA	NA	NA	1861	NA	NA	NA	2	98747.5	0.191798169	15209.35	0.536642412
ACTA1	NW_005081653.1	459809	461670	Adult Male	Hyp	Adult Male Brain	7.676628228	-1.24034659	0.6301245	3.403164294	0.065071479	0.120945575	Not Sig	36.72770452	-0.12863594	0.241452323	0.284870737	0.59352639	0.981669138	Not Sig	1861	NA	NA	NA	2	98747.5	0.191798169	15209.35	0.536642412
ACTA1	NW_005081653.1	459809	461670	Adult Male	AMV	Adult Male Brain	0.554993865	-0.872428794	3.01814157	0.116838129	0.732489422	0.838855935	Not Sig	11.64009552	-1.8166695	0.699375255	6.573910669	0.010348432	0.357372024	Not Sig	1861	NA	NA	NA	2	98747.5	0.191798169	15209.35	0.536642412
ACTA1	NW_005081653.1	459809	461670	Nestling Female	Hyp	Nestling Female Brain	113.3606132	-0.310678081	0.168991248	3.325905538	0.06819645	0.12428773	Not Sig	383.5417311	0.307841638	0.169715216	3.285314011	0.069902256	0.656867408	Not Sig	1861	NA	NA	NA	2	98747.5	0.191798169	15209.35	0.536642412
ACTA1	NW_005081653.1	459809	461670	Nestling Female	AMV	Nestling Female Brain	47.72708951	-1.424689735	0.545816071	5.700547655	0.01695962	0.0428127	Sig	166.6186944	-0.26683266	0.421918557	0.401194458	0.526473033	0.996634902	Not Sig	1861	NA	NA	NA	2	98747.5	0.191798169	15209.35	0.536642412
ACTA1	NW_005081653.1	459809	461670	Nestling Male	Hyp	Nestling Male Brain	85.67003718	-0.165045869	0.217247057	0.57523336	0.448186781	0.649350082	Not Sig	409.7419177	-0.354011712	0.211262949	2.775049588	0.095743691	0.899156401	Not Sig	1861	NA	NA	NA	2	98747.5	0.191798169	15209.35	0.536642412
ACTA1	NW_005081653.1	459809	461670	Nestling Male	AMV	Nestling Male Brain	44.86295198	-0.354163547	0.339393932	1.057128783	0.303870958	0.469412599	Not Sig	163.906233	-0.1136411	0.367330313	0.095218893	0.757644394	0.946327595	Not Sig	1861	NA	NA	NA	2	98747.5	0.191798169	15209.35	0.536642412
ACTN2	NW_005081589.1	2380882	2462749	Adult Female	Hyp	Adult Female Brain	31.27061052	-2.90133247	0.451494226	39.08506314	4.06e-10	5.33e-09	Sig	202.2964923	-0.74011272	0.245707919	9.114053739	0.002536531	0.244493437	Not Sig	81867	NA	NA	1	9	87985.82	0.336255601	6935.796	0.731370108
ACTN2	NW_005081589.1	2380882	2462749	Adult Female	AMV	Adult Female Brain	9.205411711	-1.865489858	0.938163452	3.528983893	0.060304735	0.132829886	Not Sig	63.85980298	-0.578006489	0.413879469	1.963551975	0.16113395	0.836157459	Not Sig	81867	NA	NA	1	9	87985.82	0.336255601	6935.796	0.731370108
ACTN2	NW_005081589.1	2380882	2462749	Adult Male	Heart	Adult Male Horton et al	9072.949194	-0.155163524	0.01681198	85.11761752	2.81e-20	3e-19	Sig	NA	NA	NA	NA	NA	NA	NA	81867	NA	NA	1	9	87985.82	0.336255601	6935.796	0.731370108
ACTN2	NW_005081589.1	2380882	2462749	Adult Male	Liver	Adult Male Horton et al	2.370213828	-1.076639579	2.938417933	0.177762719	0.673303016	0.790195901	Not Sig	NA	NA	NA	NA	NA	NA	NA	81867	NA	NA	1	9	87985.82	0.336255601	6935.796	0.731370108
ACTN2	NW_005081589.1	2380882	2462749	Adult Male	Hyp	Adult Male Brain	14.00112387	-3.366740288	0.536242152	36.62001352	1.44e-09	9.94e-09	Sig	101.6570482	-0.815771114	0.231891234	12.3452022	0.000442121	0.039360276	Sig	81867	NA	NA	1	9	87985.82	0.336255601	6935.796	0.731370108
ACTN2	NW_005081589.1	2380882	2462749	Adult Male	AMV	Adult Male Brain	7.080433114	-1.791515249	0.721869613	5.243112992	0.022033813	0.045548159	Sig	50.61126772	-0.594306576	0.300468964	3.907665282	0.048066328	0.589599817	Not Sig	81867	NA	NA	1	9	87985.82	0.336255601	6935.796	0.731370108
ACTN2	NW_005081589.1	2380882	2462749	Nestling Female	Hyp	Nestling Female Brain	32.90805074	-1.606517407	0.381315445	16.53629074	4.77e-05	0.000194814	Sig	260.3954238	-1.150091395	0.389638105	8.502255031	0.003547066	0.17594922	Not Sig	81867	NA	NA	1	9	87985.82	0.336255601	6935.796	0.731370108
ACTN2	NW_005081589.1	2380882	2462749	Nestling Female	AMV	Nestling Female Brain	18.1915521	-0.971325084	0.767709716	1.375386312	0.240888592	0.388348431	Not Sig	99.54132289	-0.405354225	0.748140582	0.294803428	0.587158696	0.996634902	Not Sig	81867	NA	NA	1	9	87985.82	0.336255601	6935.796	0.731370108
ACTN2	NW_005081589.1	2380882	2462749	Nestling Male	Hyp	Nestling Male Brain	46.86569501	-1.031453933	0.492875121	3.490868704	0.061708195	0.139931655	Not Sig	308.049224	-0.771886102	0.409106528	3.449346472	0.063276785	0.813392889	Not Sig	81867	NA	NA	1	9	87985.82	0.336255601	6935.796	0.731370108
ACTN2	NW_005081589.1	2380882	2462749	Nestling Male	AMV	Nestling Male Brain	28.3425585	-1.469508952	0.629896828	4.594377559	0.032076988	0.079046864	Not Sig	167.2343446	-0.546489781	0.656568364	0.674923392	0.411340337	0.830237152	Not Sig	81867	NA	NA	1	9	87985.82	0.336255601	6935.796	0.731370108
ACTR2	NW_005081615.1	1948869	1971862	Adult Female	Hyp	Adult Female Brain	5509.394186	-0.149736693	0.037012387	16.35616014	5.25e-05	0.000261051	Sig	13100.93812	0.12361311	0.11883385	1.078937968	0.298935261	0.998912819	Not Sig	22993	NA	NA	NA	32	NA	-1	NA	-1
ACTR2	NW_005081615.1	1948869	1971862	Adult Female	AMV	Adult Female Brain	7775.39901	-0.352626986	0.031681958	123.6346426	1.01e-28	4.03e-27	Sig	19637.48079	0.063931926	0.193874032	0.108586923	0.741758675	0.992913561	Not Sig	22993	NA	NA	NA	32	NA	-1	NA	-1
ACTR2	NW_005081615.1	1948869	1971862	Adult Male	Heart	Adult Male Horton et al	329.8154096	-0.069652322	0.057734502	1.448879647	0.228707808	0.320116915	Not Sig	NA	NA	NA	NA	NA	NA	NA	22993	NA	NA	NA	32	NA	-1	NA	-1
ACTR2	NW_005081615.1	1948869	1971862	Adult Male	Liver	Adult Male Horton et al	620.2056956	-0.070876613	0.053837299	1.724890233	0.18906478	0.295304508	Not Sig	NA	NA	NA	NA	NA	NA	NA	22993	NA	NA	NA	32	NA	-1	NA	-1
ACTR2	NW_005081615.1	1948869	1971862	Adult Male	Hyp	Adult Male Brain	2316.519956	-0.123394342	0.032360558	14.52853713	0.000138052	0.000497367	Sig	5328.976826	0.051767036	0.031204661	2.750470785	0.097225797	0.826389137	Not Sig	22993	NA	NA	NA	32	NA	-1	NA	-1
ACTR2	NW_005081615.1	1948869	1971862	Adult Male	AMV	Adult Male Brain	3312.705437	-0.40124413	0.031170534	165.317395	7.8e-38	3.4e-36	Sig	7330.431353	-0.043129428	0.037909728	1.294945715	0.255138515	0.821625045	Not Sig	22993	NA	NA	NA	32	NA	-1	NA	-1
ACTR2	NW_005081615.1	1948869	1971862	Nestling Female	Hyp	Nestling Female Brain	5318.314581	0.003094362	0.026501682	0.013628215	0.907066133	0.928556348	Not Sig	15611.33654	0.278224355	0.143752731	3.74017235	0.053118966	0.604452773	Not Sig	22993	NA	NA	NA	32	NA	-1	NA	-1
ACTR2	NW_005081615.1	1948869	1971862	Nestling Female	AMV	Nestling Female Brain	7348.476043	-0.25354989	0.037004104	46.8552249	7.64e-12	1.08e-10	Sig	17432.43183	-0.198127208	0.161786655	1.503109245	0.220193573	0.996634902	Not Sig	22993	NA	NA	NA	32	NA	-1	NA	-1
ACTR2	NW_005081615.1	1948869	1971862	Nestling Male	Hyp	Nestling Male Brain	5532.153929	0.020432814	0.032008676	0.4073715	0.523306652	0.711807677	Not Sig	14847.71063	0.056720504	0.171617195	0.109404449	0.740823183	1	Not Sig	22993	NA	NA	NA	32	NA	-1	NA	-1
ACTR2	NW_005081615.1	1948869	1971862	Nestling Male	AMV	Nestling Male Brain	8050.524866	-0.317216689	0.041078521	59.48944043	1.23e-14	3.26e-13	Sig	19575.9941	-0.193527401	0.1355162	2.022002294	0.155034591	0.681501839	Not Sig	22993	NA	NA	NA	32	NA	-1	NA	-1
ACYP2	NW_005081577.1	1491708	1524344	Adult Female	Hyp	Adult Female Brain	NA	NA	NA	NA	NA	NA	NA	NA	NA	NA	NA	NA	NA	NA	32636	NA	NA	1	12	80084.3	0.492304695	4277.623333	0.473561612
ACYP2	NW_005081577.1	1491708	1524344	Adult Female	AMV	Adult Female Brain	NA	NA	NA	NA	NA	NA	NA	NA	NA	NA	NA	NA	NA	NA	32636	NA	NA	1	12	80084.3	0.492304695	4277.623333	0.473561612
ACYP2	NW_005081577.1	1491708	1524344	Adult Male	Heart	Adult Male Horton et al	NA	NA	NA	NA	NA	NA	NA	NA	NA	NA	NA	NA	NA	NA	32636	NA	NA	1	12	80084.3	0.492304695	4277.623333	0.473561612
ACYP2	NW_005081577.1	1491708	1524344	Adult Male	Liver	Adult Male Horton et al	NA	NA	NA	NA	NA	NA	NA	NA	NA	NA	NA	NA	NA	NA	32636	NA	NA	1	12	80084.3	0.492304695	4277.623333	0.473561612
ACYP2	NW_005081577.1	1491708	1524344	Adult Male	Hyp	Adult Male Brain	NA	NA	NA	NA	NA	NA	NA	2936.779382	0.20091351	0.07121079	7.936299212	0.004845283	0.217799424	Not Sig	32636	NA	NA	1	12	80084.3	0.492304695	4277.623333	0.473561612
ACYP2	NW_005081577.1	1491708	1524344	Adult Male	AMV	Adult Male Brain	NA	NA	NA	NA	NA	NA	NA	2146.088099	0.297820938	0.092488113	10.3193673	0.001316414	0.101800306	Not Sig	32636	NA	NA	1	12	80084.3	0.492304695	4277.623333	0.473561612
ACYP2	NW_005081577.1	1491708	1524344	Nestling Female	Hyp	Nestling Female Brain	NA	NA	NA	NA	NA	NA	NA	NA	NA	NA	NA	NA	NA	NA	32636	NA	NA	1	12	80084.3	0.492304695	4277.623333	0.473561612
ACYP2	NW_005081577.1	1491708	1524344	Nestling Female	AMV	Nestling Female Brain	NA	NA	NA	NA	NA	NA	NA	NA	NA	NA	NA	NA	NA	NA	32636	NA	NA	1	12	80084.3	0.492304695	4277.623333	0.473561612
ACYP2	NW_005081577.1	1491708	1524344	Nestling Male	Hyp	Nestling Male Brain	NA	NA	NA	NA	NA	NA	NA	NA	NA	NA	NA	NA	NA	NA	32636	NA	NA	1	12	80084.3	0.492304695	4277.623333	0.473561612
ACYP2	NW_005081577.1	1491708	1524344	Nestling Male	AMV	Nestling Male Brain	NA	NA	NA	NA	NA	NA	NA	NA	NA	NA	NA	NA	NA	NA	32636	NA	NA	1	12	80084.3	0.492304695	4277.623333	0.473561612
ADAM17	NW_005081582.1	1212145	1246792	Adult Female	Hyp	Adult Female Brain	649.1651348	-0.182662696	0.095451753	3.654214171	0.055927532	0.125122306	Not Sig	2449.949842	-0.110520288	0.090476254	1.494907833	0.22145654	0.998912819	Not Sig	34647	NA	2	4	17	81282.23333	0.465354893	8417.46	0.736458333
ADAM17	NW_005081582.1	1212145	1246792	Adult Female	AMV	Adult Female Brain	625.2077504	-0.570090788	0.09422801	36.43944452	1.57e-09	1.6e-08	Sig	2351.359886	-0.112136965	0.101663752	1.218983922	0.26956015	0.906256628	Not Sig	34647	NA	2	4	17	81282.23333	0.465354893	8417.46	0.736458333
ADAM17	NW_005081582.1	1212145	1246792	Adult Male	Heart	Adult Male Horton et al	265.0803449	0.137328566	0.051935557	6.974532059	0.008267784	0.017232851	Sig	NA	NA	NA	NA	NA	NA	NA	34647	NA	2	4	17	81282.23333	0.465354893	8417.46	0.736458333
ADAM17	NW_005081582.1	1212145	1246792	Adult Male	Liver	Adult Male Horton et al	374.5918283	0.389346409	0.062101744	39.01846618	4.2e-10	2.91e-09	Sig	NA	NA	NA	NA	NA	NA	NA	34647	NA	2	4	17	81282.23333	0.465354893	8417.46	0.736458333
ADAM17	NW_005081582.1	1212145	1246792	Adult Male	Hyp	Adult Male Brain	283.4988651	-0.105651226	0.067986579	2.412465048	0.120372685	0.204245266	Not Sig	1045.966518	-0.072355919	0.058826716	1.513605622	0.218589724	0.933391073	Not Sig	34647	NA	2	4	17	81282.23333	0.465354893	8417.46	0.736458333
ADAM17	NW_005081582.1	1212145	1246792	Adult Male	AMV	Adult Male Brain	255.9380896	-0.302409352	0.07438157	16.50765787	4.85e-05	0.00017392	Sig	1009.687831	-0.156902024	0.066524664	5.570359479	0.01826701	0.448555145	Not Sig	34647	NA	2	4	17	81282.23333	0.465354893	8417.46	0.736458333
ADAM17	NW_005081582.1	1212145	1246792	Nestling Female	Hyp	Nestling Female Brain	680.1396643	0.015528225	0.061717782	0.063235029	0.801454031	0.856502303	Not Sig	2435.851977	-0.044957078	0.097332564	0.213380343	0.644130729	0.990270059	Not Sig	34647	NA	2	4	17	81282.23333	0.465354893	8417.46	0.736458333
ADAM17	NW_005081582.1	1212145	1246792	Nestling Female	AMV	Nestling Female Brain	635.8620895	-0.562170974	0.096858648	33.39733785	7.51e-09	7.13e-08	Sig	2302.181701	-0.179796746	0.12633821	2.030113717	0.154209069	0.996634902	Not Sig	34647	NA	2	4	17	81282.23333	0.465354893	8417.46	0.736458333
ADAM17	NW_005081582.1	1212145	1246792	Nestling Male	Hyp	Nestling Male Brain	763.625042	-0.057792784	0.082216838	0.493074272	0.482559138	0.678104684	Not Sig	2881.226405	0.056243096	0.123837187	0.206632362	0.649419827	1	Not Sig	34647	NA	2	4	17	81282.23333	0.465354893	8417.46	0.736458333
ADAM17	NW_005081582.1	1212145	1246792	Nestling Male	AMV	Nestling Male Brain	698.5110954	-0.448504571	0.095823564	21.77985738	3.06e-06	2.55e-05	Sig	2642.474104	-0.196741961	0.100344055	3.813358353	0.050845408	0.556893895	Not Sig	34647	NA	2	4	17	81282.23333	0.465354893	8417.46	0.736458333
ADAT2	NW_005081632.1	960691	970183	Adult Female	Hyp	Adult Female Brain	227.2559999	-0.509152902	0.16100422	9.918962285	0.001635846	0.005928531	Sig	682.2155775	-0.127447626	0.140883848	0.820202733	0.365120898	0.998912819	Not Sig	9492	NA	NA	1	5	89837.2	0.304305474	12783.5	0.169270833
ADAT2	NW_005081632.1	960691	970183	Adult Female	AMV	Adult Female Brain	164.5114919	-0.676203575	0.188004702	12.81388741	0.000344056	0.001338826	Sig	488.3881647	-0.195327476	0.100244924	3.804400796	0.051118063	0.637998119	Not Sig	9492	NA	NA	1	5	89837.2	0.304305474	12783.5	0.169270833
ADAT2	NW_005081632.1	960691	970183	Adult Male	Heart	Adult Male Horton et al	42.43751228	-0.278488148	0.145399097	3.578502591	0.05853189	0.099113518	Not Sig	NA	NA	NA	NA	NA	NA	NA	9492	NA	NA	1	5	89837.2	0.304305474	12783.5	0.169270833
ADAT2	NW_005081632.1	960691	970183	Adult Male	Liver	Adult Male Horton et al	47.81466177	0.307321993	0.121040781	6.381551765	0.011531257	0.026263914	Sig	NA	NA	NA	NA	NA	NA	NA	9492	NA	NA	1	5	89837.2	0.304305474	12783.5	0.169270833
ADAT2	NW_005081632.1	960691	970183	Adult Male	Hyp	Adult Male Brain	109.0730389	-0.472162563	0.132073024	12.6462756	0.000376315	0.001268856	Sig	354.1746461	-0.222600216	0.073540385	9.171434412	0.002458218	0.141013272	Not Sig	9492	NA	NA	1	5	89837.2	0.304305474	12783.5	0.169270833
ADAT2	NW_005081632.1	960691	970183	Adult Male	AMV	Adult Male Brain	67.25649842	-0.598645005	0.149760893	15.86702106	6.8e-05	0.000233044	Sig	227.1864788	-0.313933	0.104844646	8.986369708	0.002720008	0.164242204	Not Sig	9492	NA	NA	1	5	89837.2	0.304305474	12783.5	0.169270833
ADAT2	NW_005081632.1	960691	970183	Nestling Female	Hyp	Nestling Female Brain	232.8631887	-0.505257163	0.117217104	18.38954812	1.8e-05	8.01e-05	Sig	705.5800445	-0.111226907	0.081605651	1.85848067	0.172800255	0.833226205	Not Sig	9492	NA	NA	1	5	89837.2	0.304305474	12783.5	0.169270833
ADAT2	NW_005081632.1	960691	970183	Nestling Female	AMV	Nestling Female Brain	208.5238048	-0.614811945	0.154225625	15.66152942	7.57e-05	0.000368078	Sig	561.5739877	-0.152880617	0.147572094	1.075349973	0.299740133	0.996634902	Not Sig	9492	NA	NA	1	5	89837.2	0.304305474	12783.5	0.169270833
ADAT2	NW_005081632.1	960691	970183	Nestling Male	Hyp	Nestling Male Brain	271.0293043	-0.375395226	0.136574385	7.500123236	0.006169477	0.020189337	Sig	824.6363964	-0.072554269	0.101655376	0.508371099	0.475844846	0.995064234	Not Sig	9492	NA	NA	1	5	89837.2	0.304305474	12783.5	0.169270833
ADAT2	NW_005081632.1	960691	970183	Nestling Male	AMV	Nestling Male Brain	238.8350072	-0.354414277	0.205023728	2.900290545	0.088563588	0.182596242	Not Sig	621.8012774	-0.152762514	0.11719585	1.689566418	0.193658135	0.717483667	Not Sig	9492	NA	NA	1	5	89837.2	0.304305474	12783.5	0.169270833
ADGB	NW_005081611.1	812384	911478	Adult Female	Hyp	Adult Female Brain	267.5481793	0.046628842	0.149003008	0.097461455	0.75489752	0.875478927	Not Sig	1010.375247	0.242489116	0.18323799	1.741242835	0.186981428	0.998912819	Not Sig	99094	NA	5	9	23	75340.61667	0.593025521	10212.69	0.533953064
ADGB	NW_005081611.1	812384	911478	Adult Female	AMV	Adult Female Brain	0	NA	NA	NA	NA	100	Not Sig	4.276951805	-3.960398764	2.255717761	2.516360558	0.112670353	0.774487128	Not Sig	99094	NA	5	9	23	75340.61667	0.593025521	10212.69	0.533953064
ADGB	NW_005081611.1	812384	911478	Adult Male	Heart	Adult Male Horton et al	0.049401026	-0.163922262	2.958439505	0.005483705	0.940968975	100	Not Sig	NA	NA	NA	NA	NA	NA	NA	99094	NA	5	9	23	75340.61667	0.593025521	10212.69	0.533953064
ADGB	NW_005081611.1	812384	911478	Adult Male	Liver	Adult Male Horton et al	32.73366037	-5.066202923	0.51347247	77.15026134	1.58e-18	2.06e-17	Sig	NA	NA	NA	NA	NA	NA	NA	99094	NA	5	9	23	75340.61667	0.593025521	10212.69	0.533953064
ADGB	NW_005081611.1	812384	911478	Adult Male	Hyp	Adult Male Brain	74.24745489	0.180980972	0.15942844	1.271957127	0.259399845	0.386527815	Not Sig	295.6075403	-0.020932031	0.133158131	0.02478173	0.874912167	0.992784155	Not Sig	99094	NA	5	9	23	75340.61667	0.593025521	10212.69	0.533953064
ADGB	NW_005081611.1	812384	911478	Adult Male	AMV	Adult Male Brain	0	NA	NA	NA	NA	100	Not Sig	0.953806384	-3.434299958	2.280196161	3.042289984	0.081121406	100	Not Sig	99094	NA	5	9	23	75340.61667	0.593025521	10212.69	0.533953064
ADGB	NW_005081611.1	812384	911478	Nestling Female	Hyp	Nestling Female Brain	445.083486	0.18547845	0.081693151	5.134346757	0.023456913	0.050051067	Not Sig	1660.797126	0.035018478	0.165069734	0.04501795	0.831971026	0.996728869	Not Sig	99094	NA	5	9	23	75340.61667	0.593025521	10212.69	0.533953064
ADGB	NW_005081611.1	812384	911478	Nestling Female	AMV	Nestling Female Brain	30.76987852	-4.613323549	0.916924488	15.23921639	9.47e-05	0.000430542	Sig	129.7580141	-0.424269561	0.496076226	0.734997093	0.391268216	0.996634902	Not Sig	99094	NA	5	9	23	75340.61667	0.593025521	10212.69	0.533953064
ADGB	NW_005081611.1	812384	911478	Nestling Male	Hyp	Nestling Male Brain	362.6794053	0.104820343	0.119924934	0.76026201	0.38324654	0.590815893	Not Sig	1896.385044	-0.578507064	0.168045957	11.5892798	0.000663331	0.122820124	Not Sig	99094	NA	5	9	23	75340.61667	0.593025521	10212.69	0.533953064
ADGB	NW_005081611.1	812384	911478	Nestling Male	AMV	Nestling Male Brain	39.54336433	-4.127501162	0.690743182	26.75640044	2.31e-07	2.41e-06	Sig	183.7595981	-0.536264569	0.409981328	1.667463592	0.19659861	0.719680841	Not Sig	99094	NA	5	9	23	75340.61667	0.593025521	10212.69	0.533953064
ADGRB3	NW_005081553.1	853848	1300183	Adult Female	Hyp	Adult Female Brain	1359.292847	-0.002465352	0.064483569	0.001461626	0.969503331	0.986559242	Not Sig	9772.486836	0.080380356	0.067859878	1.400679451	0.236609842	0.998912819	Not Sig	446335	NA	1	4	0	97412.47083	0.250600688	4557.8225	0.605287678
ADGRB3	NW_005081553.1	853848	1300183	Adult Female	AMV	Adult Female Brain	1810.392665	-0.012734731	0.073327203	0.030067241	0.862337748	0.91336365	Not Sig	13285.68337	-0.009600242	0.058234919	0.027182224	0.86904605	0.995751102	Not Sig	446335	NA	1	4	0	97412.47083	0.250600688	4557.8225	0.605287678
ADGRB3	NW_005081553.1	853848	1300183	Adult Male	Heart	Adult Male Horton et al	NA	NA	NA	NA	NA	NA	NA	NA	NA	NA	NA	NA	NA	NA	446335	NA	1	4	0	97412.47083	0.250600688	4557.8225	0.605287678
ADGRB3	NW_005081553.1	853848	1300183	Adult Male	Liver	Adult Male Horton et al	NA	NA	NA	NA	NA	NA	NA	NA	NA	NA	NA	NA	NA	NA	446335	NA	1	4	0	97412.47083	0.250600688	4557.8225	0.605287678
ADGRB3	NW_005081553.1	853848	1300183	Adult Male	Hyp	Adult Male Brain	532.003532	0.120232323	0.058633044	4.19569986	0.040526622	0.081518177	Not Sig	4084.552247	0.132717413	0.040323233	10.81499777	0.001006811	0.078428324	Not Sig	446335	NA	1	4	0	97412.47083	0.250600688	4557.8225	0.605287678
ADGRB3	NW_005081553.1	853848	1300183	Adult Male	AMV	Adult Male Brain	674.4763367	0.045161218	0.055809087	0.653537409	0.418850796	0.568984328	Not Sig	5020.871484	0.011937202	0.047443291	0.063334005	0.801301959	0.976150894	Not Sig	446335	NA	1	4	0	97412.47083	0.250600688	4557.8225	0.605287678
ADGRB3	NW_005081553.1	853848	1300183	Nestling Female	Hyp	Nestling Female Brain	1470.034168	0.130996406	0.044798912	8.541057232	0.003472239	0.009092707	Sig	9370.535309	0.173493303	0.065422504	7.028812215	0.008020854	0.260594767	Not Sig	446335	NA	1	4	0	97412.47083	0.250600688	4557.8225	0.605287678
ADGRB3	NW_005081553.1	853848	1300183	Nestling Female	AMV	Nestling Female Brain	2054.64631	-0.05157157	0.050619322	1.036736832	0.308581615	0.463045579	Not Sig	12493.94497	-0.110235818	0.089301699	1.525972889	0.21671785	0.996634902	Not Sig	446335	NA	1	4	0	97412.47083	0.250600688	4557.8225	0.605287678
ADGRB3	NW_005081553.1	853848	1300183	Nestling Male	Hyp	Nestling Male Brain	1286.035225	0.096319398	0.07784588	1.523961436	0.217020993	0.387588146	Not Sig	9989.009108	-0.048306551	0.085370144	0.319733585	0.571767795	0.996116837	Not Sig	446335	NA	1	4	0	97412.47083	0.250600688	4557.8225	0.605287678
ADGRB3	NW_005081553.1	853848	1300183	Nestling Male	AMV	Nestling Male Brain	2224.106418	-0.112948672	0.066884515	2.844805871	0.091669665	0.186788628	Not Sig	13158.29905	-0.045667114	0.100601716	0.205673528	0.650179791	0.914811199	Not Sig	446335	NA	1	4	0	97412.47083	0.250600688	4557.8225	0.605287678
ADGRF5	NW_005081561.1	2589509	2630732	Adult Female	Hyp	Adult Female Brain	81.86332855	0.116609665	0.265466011	0.189993142	0.662922325	0.818720757	Not Sig	655.0120202	-0.12668745	0.153123593	0.685681752	0.407637072	0.998912819	Not Sig	41223	NA	2	4	5	136394	0.029157737	17216.46667	0.254190128
ADGRF5	NW_005081561.1	2589509	2630732	Adult Female	AMV	Adult Female Brain	94.1779533	-0.217774734	0.283172408	0.572011705	0.449460624	0.612040052	Not Sig	768.3997071	0.030806128	0.115470255	0.071216056	0.789574364	0.992913561	Not Sig	41223	NA	2	4	5	136394	0.029157737	17216.46667	0.254190128
ADGRF5	NW_005081561.1	2589509	2630732	Adult Male	Heart	Adult Male Horton et al	214.3977846	-0.064033711	0.053835941	1.411576108	0.234794927	0.325999376	Not Sig	NA	NA	NA	NA	NA	NA	NA	41223	NA	2	4	5	136394	0.029157737	17216.46667	0.254190128
ADGRF5	NW_005081561.1	2589509	2630732	Adult Male	Liver	Adult Male Horton et al	151.6111034	-0.028214787	0.086397102	0.105544956	0.745274292	0.84872881	Not Sig	NA	NA	NA	NA	NA	NA	NA	41223	NA	2	4	5	136394	0.029157737	17216.46667	0.254190128
ADGRF5	NW_005081561.1	2589509	2630732	Adult Male	Hyp	Adult Male Brain	24.08418961	-0.047158127	0.231972366	0.04113954	0.839268813	0.907410885	Not Sig	242.3957085	0.087257885	0.10325515	0.713781873	0.398191174	0.96600323	Not Sig	41223	NA	2	4	5	136394	0.029157737	17216.46667	0.254190128
ADGRF5	NW_005081561.1	2589509	2630732	Adult Male	AMV	Adult Male Brain	34.82274437	-0.017412314	0.206345179	0.007044548	0.933110654	0.960663134	Not Sig	299.7264263	-0.030388283	0.120413902	0.065129387	0.79856508	0.976150894	Not Sig	41223	NA	2	4	5	136394	0.029157737	17216.46667	0.254190128
ADGRF5	NW_005081561.1	2589509	2630732	Nestling Female	Hyp	Nestling Female Brain	78.43684693	-0.053067716	0.189347971	0.077652177	0.780504687	0.849958219	Not Sig	706.661632	-0.278980864	0.134105037	4.321060256	0.03764346	0.532547574	Not Sig	41223	NA	2	4	5	136394	0.029157737	17216.46667	0.254190128
ADGRF5	NW_005081561.1	2589509	2630732	Nestling Female	AMV	Nestling Female Brain	72.89690063	-0.147329898	0.214901754	0.470147236	0.492919441	0.642533528	Not Sig	584.4594333	-0.095295321	0.186635396	0.261505448	0.609087774	0.996634902	Not Sig	41223	NA	2	4	5	136394	0.029157737	17216.46667	0.254190128
ADGRF5	NW_005081561.1	2589509	2630732	Nestling Male	Hyp	Nestling Male Brain	94.91386573	-0.232167649	0.22799852	1.021338148	0.312201807	0.513910504	Not Sig	840.5780582	0.007198332	0.151080373	0.002291128	0.961823255	1	Not Sig	41223	NA	2	4	5	136394	0.029157737	17216.46667	0.254190128
ADGRF5	NW_005081561.1	2589509	2630732	Nestling Male	AMV	Nestling Male Brain	87.42743381	-0.116647526	0.276941048	0.174989858	0.675714711	0.808814035	Not Sig	679.1283929	-0.154610908	0.198355	0.603883899	0.437099968	0.837944193	Not Sig	41223	NA	2	4	5	136394	0.029157737	17216.46667	0.254190128
ADGRG6	NW_005081632.1	1367946	1478219	Adult Female	Hyp	Adult Female Brain	328.5600566	-0.566104947	0.137157543	16.89253652	3.96e-05	0.000202801	Sig	1338.94666	-0.267095253	0.140366436	3.634854369	0.056581554	0.864426661	Not Sig	110273	NA	1	8	14	86994.56667	0.364958764	12036.91667	0.816181566
ADGRG6	NW_005081632.1	1367946	1478219	Adult Female	AMV	Adult Female Brain	256.1768996	-0.617067948	0.167763567	13.33027198	0.000261156	0.001042681	Sig	978.5469144	-0.284377945	0.179603263	2.516807179	0.112638439	0.774487128	Not Sig	110273	NA	1	8	14	86994.56667	0.364958764	12036.91667	0.816181566
ADGRG6	NW_005081632.1	1367946	1478219	Adult Male	Heart	Adult Male Horton et al	34.04230014	-0.082845544	0.154366037	0.281886267	0.595467547	0.694177127	Not Sig	NA	NA	NA	NA	NA	NA	NA	110273	NA	1	8	14	86994.56667	0.364958764	12036.91667	0.816181566
ADGRG6	NW_005081632.1	1367946	1478219	Adult Male	Liver	Adult Male Horton et al	222.4806093	0.380262065	0.100207615	14.10040325	0.000173307	0.000563247	Sig	NA	NA	NA	NA	NA	NA	NA	110273	NA	1	8	14	86994.56667	0.364958764	12036.91667	0.816181566
ADGRG6	NW_005081632.1	1367946	1478219	Adult Male	Hyp	Adult Male Brain	137.9613144	-0.189177234	0.118987411	2.504645356	0.113511035	0.195760015	Not Sig	603.7498004	-0.204235589	0.084417569	5.863243761	0.015460276	0.416425123	Not Sig	110273	NA	1	8	14	86994.56667	0.364958764	12036.91667	0.816181566
ADGRG6	NW_005081632.1	1367946	1478219	Adult Male	AMV	Adult Male Brain	91.07314828	-0.049182092	0.139717012	0.122686034	0.726139332	0.838855935	Not Sig	411.5577359	-0.357648614	0.125465297	8.133956372	0.004344385	0.218431972	Not Sig	110273	NA	1	8	14	86994.56667	0.364958764	12036.91667	0.816181566
ADGRG6	NW_005081632.1	1367946	1478219	Nestling Female	Hyp	Nestling Female Brain	322.3705225	-0.767375667	0.20878362	12.97643881	0.000315435	0.00107248	Sig	1503.922297	-0.707051719	0.201729821	12.16937409	0.000485806	0.054062181	Not Sig	110273	NA	1	8	14	86994.56667	0.364958764	12036.91667	0.816181566
ADGRG6	NW_005081632.1	1367946	1478219	Nestling Female	AMV	Nestling Female Brain	265.6481514	-0.562185356	0.144733816	14.88060773	0.000114534	0.000508769	Sig	986.4179944	-0.20083902	0.211130113	0.907235786	0.340848911	0.996634902	Not Sig	110273	NA	1	8	14	86994.56667	0.364958764	12036.91667	0.816181566
ADGRG6	NW_005081632.1	1367946	1478219	Nestling Male	Hyp	Nestling Male Brain	487.1889861	-0.499006705	0.11735376	17.88719902	2.34e-05	0.000155267	Sig	1993.517012	-0.398382867	0.227205214	3.030999885	0.081687662	0.878886172	Not Sig	110273	NA	1	8	14	86994.56667	0.364958764	12036.91667	0.816181566
ADGRG6	NW_005081632.1	1367946	1478219	Nestling Male	AMV	Nestling Male Brain	289.1231962	-0.719461121	0.171948871	17.11724571	3.51e-05	0.000224517	Sig	1198.235467	-0.389367382	0.263177453	2.149096666	0.1426538	0.674667046	Not Sig	110273	NA	1	8	14	86994.56667	0.364958764	12036.91667	0.816181566
ADI1	NW_005081582.1	3781916	3787434	Adult Female	Hyp	Adult Female Brain	970.1081972	-1.083463696	0.0815742	173.5680213	1.23e-39	1.29e-37	Sig	3629.126603	-0.450014089	0.108176099	17.39730553	3.03e-05	0.009208695	Sig	5518	NA	NA	3	35	88335.5	0.330995519	11259.4	0.88981289
ADI1	NW_005081582.1	3781916	3787434	Adult Female	AMV	Adult Female Brain	953.0503191	-1.268042897	0.101570589	151.2686497	9.16e-35	5.42e-33	Sig	3908.772117	-0.622292348	0.115536092	29.16999511	6.63e-08	4.78e-05	Sig	5518	NA	NA	3	35	88335.5	0.330995519	11259.4	0.88981289
ADI1	NW_005081582.1	3781916	3787434	Adult Male	Heart	Adult Male Horton et al	377.9178757	-1.221028318	0.05344425	516.7004653	2.21e-114	3.19e-112	Sig	NA	NA	NA	NA	NA	NA	NA	5518	NA	NA	3	35	88335.5	0.330995519	11259.4	0.88981289
ADI1	NW_005081582.1	3781916	3787434	Adult Male	Liver	Adult Male Horton et al	683.3751529	-1.634057777	0.065839393	590.0892736	2.4e-130	5.06e-128	Sig	NA	NA	NA	NA	NA	NA	NA	5518	NA	NA	3	35	88335.5	0.330995519	11259.4	0.88981289
ADI1	NW_005081582.1	3781916	3787434	Adult Male	Hyp	Adult Male Brain	429.9353092	-0.988163138	0.081976649	143.0814853	5.64e-33	2.05e-31	Sig	1821.109907	-0.452953607	0.052701725	73.986832	7.86e-18	1.08e-14	Sig	5518	NA	NA	3	35	88335.5	0.330995519	11259.4	0.88981289
ADI1	NW_005081582.1	3781916	3787434	Adult Male	AMV	Adult Male Brain	472.0721938	-1.156712101	0.070501013	266.3233288	7.18e-60	6.26e-58	Sig	1889.585352	-0.366087408	0.078983954	21.52799975	3.49e-06	0.001240413	Sig	5518	NA	NA	3	35	88335.5	0.330995519	11259.4	0.88981289
ADI1	NW_005081582.1	3781916	3787434	Nestling Female	Hyp	Nestling Female Brain	677.4672682	-0.959990714	0.12623587	56.30309736	6.21e-14	8.37e-13	Sig	2657.065319	-0.585921293	0.105013457	30.93053732	2.67e-08	2.7e-05	Sig	5518	NA	NA	3	35	88335.5	0.330995519	11259.4	0.88981289
ADI1	NW_005081582.1	3781916	3787434	Nestling Female	AMV	Nestling Female Brain	605.2713757	-1.293597662	0.127705685	98.7861982	2.81e-23	1.16e-21	Sig	2064.520681	-0.385919823	0.166612558	5.380875857	0.020358655	0.996634902	Not Sig	5518	NA	NA	3	35	88335.5	0.330995519	11259.4	0.88981289
ADI1	NW_005081582.1	3781916	3787434	Nestling Male	Hyp	Nestling Male Brain	799.4176897	-1.13603992	0.083182084	183.2776512	9.33e-42	1.46e-39	Sig	3003.180113	-0.302450823	0.083833516	12.88837346	0.00033063	0.075347021	Not Sig	5518	NA	NA	3	35	88335.5	0.330995519	11259.4	0.88981289
ADI1	NW_005081582.1	3781916	3787434	Nestling Male	AMV	Nestling Male Brain	690.3928535	-1.407741805	0.092138778	227.670965	1.92e-51	4.97e-49	Sig	2319.957521	-0.25952613	0.144828541	3.173705433	0.074832491	0.596954164	Not Sig	5518	NA	NA	3	35	88335.5	0.330995519	11259.4	0.88981289
ADSS	NW_005081620.1	2212055	2249058	Adult Female	Hyp	Adult Female Brain	949.4045661	-0.188958749	0.074445764	6.437667417	0.011172526	0.033264376	Sig	4719.316287	-2.92e-05	0.059564406	1.49e-05	0.996919996	0.998935138	Not Sig	37003	NA	NA	NA	7	106326.4333	0.130917592	15417.93333	0.522695773
ADSS	NW_005081620.1	2212055	2249058	Adult Female	AMV	Adult Female Brain	1416.839332	-0.429097596	0.072473696	34.90217496	3.47e-09	3.34e-08	Sig	6796.796166	-0.002559921	0.087354409	0.000861059	0.976590391	0.997063119	Not Sig	37003	NA	NA	NA	7	106326.4333	0.130917592	15417.93333	0.522695773
ADSS	NW_005081620.1	2212055	2249058	Adult Male	Heart	Adult Male Horton et al	92.23639976	0.091011699	0.095708717	0.895047614	0.344113108	0.448956016	Not Sig	NA	NA	NA	NA	NA	NA	NA	37003	NA	NA	NA	7	106326.4333	0.130917592	15417.93333	0.522695773
ADSS	NW_005081620.1	2212055	2249058	Adult Male	Liver	Adult Male Horton et al	281.8875676	0.425262977	0.096285315	19.1752826	1.19e-05	4.87e-05	Sig	NA	NA	NA	NA	NA	NA	NA	37003	NA	NA	NA	7	106326.4333	0.130917592	15417.93333	0.522695773
ADSS	NW_005081620.1	2212055	2249058	Adult Male	Hyp	Adult Male Brain	446.3726775	-0.10971946	0.057824427	3.595671021	0.057930237	0.109806503	Not Sig	2267.871375	0.015879334	0.043840601	0.131554356	0.716825842	0.987192483	Not Sig	37003	NA	NA	NA	7	106326.4333	0.130917592	15417.93333	0.522695773
ADSS	NW_005081620.1	2212055	2249058	Adult Male	AMV	Adult Male Brain	536.1172065	-0.450842081	0.050823464	78.68861016	7.27e-19	1.19e-17	Sig	2873.276469	-0.196824602	0.064741981	9.255418705	0.002347996	0.150656911	Not Sig	37003	NA	NA	NA	7	106326.4333	0.130917592	15417.93333	0.522695773
ADSS	NW_005081620.1	2212055	2249058	Nestling Female	Hyp	Nestling Female Brain	840.4310917	0.040840688	0.055176806	0.54728151	0.4594306	0.590371167	Not Sig	4291.009707	-0.045397754	0.057635559	0.620373245	0.43090862	0.970030647	Not Sig	37003	NA	NA	NA	7	106326.4333	0.130917592	15417.93333	0.522695773
ADSS	NW_005081620.1	2212055	2249058	Nestling Female	AMV	Nestling Female Brain	1600.166286	-0.046165374	0.065102237	0.50158781	0.478803282	0.630485237	Not Sig	7985.678706	-0.181095617	0.14716852	1.51732187	0.218025224	0.996634902	Not Sig	37003	NA	NA	NA	7	106326.4333	0.130917592	15417.93333	0.522695773
ADSS	NW_005081620.1	2212055	2249058	Nestling Male	Hyp	Nestling Male Brain	878.2969867	-0.018905012	0.072726397	0.06749848	0.795014428	0.891231559	Not Sig	4619.677149	0.017344472	0.072128214	0.057919987	0.809814213	1	Not Sig	37003	NA	NA	NA	7	106326.4333	0.130917592	15417.93333	0.522695773
ADSS	NW_005081620.1	2212055	2249058	Nestling Male	AMV	Nestling Male Brain	1723.993223	-0.093564026	0.072959178	1.64017522	0.200301429	0.344952034	Not Sig	7810.167272	0.01781363	0.168409583	0.011196311	0.915731023	0.985796474	Not Sig	37003	NA	NA	NA	7	106326.4333	0.130917592	15417.93333	0.522695773
AFDN	NW_005081574.1	354953	435976	Adult Female	Hyp	Adult Female Brain	1828.397078	-0.116907577	0.064488332	3.280321932	0.070115174	0.151006246	Not Sig	7212.294902	0.040462366	0.113471447	0.127039398	0.721521661	0.998912819	Not Sig	81023	NA	NA	9	13	90029.76	0.392109877	13007.62	0.522260481
AFDN	NW_005081574.1	354953	435976	Adult Female	AMV	Adult Female Brain	1487.444471	-0.076503131	0.065279811	1.372326769	0.241412515	0.396448074	Not Sig	5269.988457	0.083228206	0.1252089	0.441041226	0.506620328	0.972009808	Not Sig	81023	NA	NA	9	13	90029.76	0.392109877	13007.62	0.522260481
AFDN	NW_005081574.1	354953	435976	Adult Male	Heart	Adult Male Horton et al	1039.920905	0.133104651	0.034460035	14.89423142	0.00011371	0.000322052	Sig	NA	NA	NA	NA	NA	NA	NA	81023	NA	NA	9	13	90029.76	0.392109877	13007.62	0.522260481
AFDN	NW_005081574.1	354953	435976	Adult Male	Liver	Adult Male Horton et al	676.4927427	0.309676834	0.069271168	19.76224012	8.77e-06	3.69e-05	Sig	NA	NA	NA	NA	NA	NA	NA	81023	NA	NA	9	13	90029.76	0.392109877	13007.62	0.522260481
AFDN	NW_005081574.1	354953	435976	Adult Male	Hyp	Adult Male Brain	715.8757803	-0.077187699	0.05109691	2.27811954	0.131210877	0.219799112	Not Sig	2604.782237	0.050426387	0.103334585	0.237970403	0.625675855	0.981669138	Not Sig	81023	NA	NA	9	13	90029.76	0.392109877	13007.62	0.522260481
AFDN	NW_005081574.1	354953	435976	Adult Male	AMV	Adult Male Brain	504.9259412	-0.206247575	0.058941484	12.22282897	0.000472083	0.001431301	Sig	2120.333656	-0.121117766	0.096622649	1.572830456	0.209796439	0.801097949	Not Sig	81023	NA	NA	9	13	90029.76	0.392109877	13007.62	0.522260481
AFDN	NW_005081574.1	354953	435976	Nestling Female	Hyp	Nestling Female Brain	1825.577428	0.127087844	0.046375368	7.496108134	0.006183247	0.015158457	Sig	7470.090881	0.040155895	0.096733018	0.172351882	0.678030019	0.99229163	Not Sig	81023	NA	NA	9	13	90029.76	0.392109877	13007.62	0.522260481
AFDN	NW_005081574.1	354953	435976	Nestling Female	AMV	Nestling Female Brain	1922.107589	0.107770094	0.056695248	3.606875587	0.057541128	0.117234384	Not Sig	7110.305095	-0.124699921	0.15244885	0.670187801	0.412986139	0.996634902	Not Sig	81023	NA	NA	9	13	90029.76	0.392109877	13007.62	0.522260481
AFDN	NW_005081574.1	354953	435976	Nestling Male	Hyp	Nestling Male Brain	1849.858204	0.026632172	0.048477017	0.301742612	0.582792017	0.76286428	Not Sig	8048.594933	-0.150959391	0.124642959	1.459930346	0.226941204	0.995064234	Not Sig	81023	NA	NA	9	13	90029.76	0.392109877	13007.62	0.522260481
AFDN	NW_005081574.1	354953	435976	Nestling Male	AMV	Nestling Male Brain	2024.690904	-0.055942191	0.072293692	0.597053393	0.439704504	0.623389033	Not Sig	8470.548858	-0.200867923	0.17429124	1.316499294	0.251221286	0.7501328	Not Sig	81023	NA	NA	9	13	90029.76	0.392109877	13007.62	0.522260481
AFG1L	NW_005081561.1	1921293	1979202	Adult Female	Hyp	Adult Female Brain	919.9063792	-0.26376996	0.082686745	10.15094892	0.00144227	0.005281622	Sig	2845.528309	0.226477518	0.180599435	1.563715032	0.211122096	0.998912819	Not Sig	57909	NA	2	1	8	70516.86667	0.692837197	17878.7	0.096572534
AFG1L	NW_005081561.1	1921293	1979202	Adult Female	AMV	Adult Female Brain	767.6371449	-0.21969216	0.093555311	5.498814095	0.019029375	0.049247104	Sig	2472.080063	-0.009121522	0.074023465	0.015195745	0.901892485	0.996882595	Not Sig	57909	NA	2	1	8	70516.86667	0.692837197	17878.7	0.096572534
AFG1L	NW_005081561.1	1921293	1979202	Adult Male	Heart	Adult Male Horton et al	674.0520493	-0.076371763	0.033678888	5.13724593	0.02341777	0.043820197	Sig	NA	NA	NA	NA	NA	NA	NA	57909	NA	2	1	8	70516.86667	0.692837197	17878.7	0.096572534
AFG1L	NW_005081561.1	1921293	1979202	Adult Male	Liver	Adult Male Horton et al	270.0066028	0.116729515	0.072926276	2.541115955	0.110916368	0.187824311	Not Sig	NA	NA	NA	NA	NA	NA	NA	57909	NA	2	1	8	70516.86667	0.692837197	17878.7	0.096572534
AFG1L	NW_005081561.1	1921293	1979202	Adult Male	Hyp	Adult Male Brain	402.6875264	-0.105404313	0.06033443	3.048089817	0.080832162	0.145858378	Not Sig	1533.621726	-0.101705942	0.056512255	3.241886204	0.071777958	0.7639956	Not Sig	57909	NA	2	1	8	70516.86667	0.692837197	17878.7	0.096572534
AFG1L	NW_005081561.1	1921293	1979202	Adult Male	AMV	Adult Male Brain	314.9704415	-0.264430288	0.068926408	14.69624726	0.000126298	0.000415432	Sig	1148.580551	-0.086712315	0.059236544	2.143889454	0.143138581	0.737803726	Not Sig	57909	NA	2	1	8	70516.86667	0.692837197	17878.7	0.096572534
AFG1L	NW_005081561.1	1921293	1979202	Nestling Female	Hyp	Nestling Female Brain	699.2759508	0.064626364	0.069869369	0.85272819	0.35578169	0.47852868	Not Sig	2311.201519	-0.037072473	0.143670761	0.066584975	0.796375537	0.996728869	Not Sig	57909	NA	2	1	8	70516.86667	0.692837197	17878.7	0.096572534
AFG1L	NW_005081561.1	1921293	1979202	Nestling Female	AMV	Nestling Female Brain	481.9291297	-0.155970826	0.132427968	1.369342465	0.241924889	0.388807858	Not Sig	1509.239535	-0.120134251	0.123858108	0.942728109	0.331577228	0.996634902	Not Sig	57909	NA	2	1	8	70516.86667	0.692837197	17878.7	0.096572534
AFG1L	NW_005081561.1	1921293	1979202	Nestling Male	Hyp	Nestling Male Brain	692.427242	0.1643388	0.083712834	3.845742343	0.04987244	0.117733427	Not Sig	2543.905679	-0.221448717	0.140646662	2.461650563	0.11665614	0.942076488	Not Sig	57909	NA	2	1	8	70516.86667	0.692837197	17878.7	0.096572534
AFG1L	NW_005081561.1	1921293	1979202	Nestling Male	AMV	Nestling Male Brain	474.5609005	-0.226529166	0.104619459	4.674637338	0.030611165	0.075795589	Not Sig	1643.165857	-0.260550818	0.120054994	4.657344444	0.030920979	0.527376339	Not Sig	57909	NA	2	1	8	70516.86667	0.692837197	17878.7	0.096572534
AFTPH	NW_005081615.1	1670171	1712307	Adult Female	Hyp	Adult Female Brain	1036.570705	-0.032484844	0.072230103	0.202178966	0.652967766	0.810235091	Not Sig	6286.735189	0.017381286	0.080055928	0.047135145	0.828125505	0.998912819	Not Sig	42136	NA	2	2	19	NA	-1	NA	-1
AFTPH	NW_005081615.1	1670171	1712307	Adult Female	AMV	Adult Female Brain	1181.694679	-0.073013843	0.068693431	1.129419266	0.287899244	0.452714185	Not Sig	6787.390109	0.069919248	0.044454964	2.470156698	0.116026357	0.780855812	Not Sig	42136	NA	2	2	19	NA	-1	NA	-1
AFTPH	NW_005081615.1	1670171	1712307	Adult Male	Heart	Adult Male Horton et al	126.1570802	-0.221037486	0.075073952	8.619992968	0.003324931	0.007431694	Sig	NA	NA	NA	NA	NA	NA	NA	42136	NA	2	2	19	NA	-1	NA	-1
AFTPH	NW_005081615.1	1670171	1712307	Adult Male	Liver	Adult Male Horton et al	268.8005204	-0.04811177	0.072767927	0.433661764	0.510197625	0.64538472	Not Sig	NA	NA	NA	NA	NA	NA	NA	42136	NA	2	2	19	NA	-1	NA	-1
AFTPH	NW_005081615.1	1670171	1712307	Adult Male	Hyp	Adult Male Brain	470.6455844	-0.02215209	0.059591004	0.137930864	0.71034674	0.818477204	Not Sig	3163.331823	0.06214024	0.040375924	2.368128281	0.123835449	0.865761656	Not Sig	42136	NA	2	2	19	NA	-1	NA	-1
AFTPH	NW_005081615.1	1670171	1712307	Adult Male	AMV	Adult Male Brain	452.4129672	-0.264437159	0.069900518	14.25795012	0.000159386	0.000514561	Sig	3217.071358	-0.051898003	0.041296349	1.579995196	0.208761385	0.799690891	Not Sig	42136	NA	2	2	19	NA	-1	NA	-1
AFTPH	NW_005081615.1	1670171	1712307	Nestling Female	Hyp	Nestling Female Brain	763.1723371	0.114727858	0.060117967	3.636062538	0.056540503	0.106411074	Not Sig	4333.960529	0.08851404	0.071076407	1.551055688	0.21297966	0.870960025	Not Sig	42136	NA	2	2	19	NA	-1	NA	-1
AFTPH	NW_005081615.1	1670171	1712307	Nestling Female	AMV	Nestling Female Brain	726.1926435	-0.076161711	0.075276464	1.021710431	0.312113633	0.465824376	Not Sig	4212.739573	-0.103203743	0.112053801	0.849595109	0.356666905	0.996634902	Not Sig	42136	NA	2	2	19	NA	-1	NA	-1
AFTPH	NW_005081615.1	1670171	1712307	Nestling Male	Hyp	Nestling Male Brain	753.7957814	0.07849543	0.090886848	0.742649617	0.388813431	0.594129907	Not Sig	4915.247076	-0.058916791	0.058519393	1.011937681	0.314439078	0.995064234	Not Sig	42136	NA	2	2	19	NA	-1	NA	-1
AFTPH	NW_005081615.1	1670171	1712307	Nestling Male	AMV	Nestling Male Brain	792.976967	-0.043333697	0.088008189	0.241914423	0.622826824	0.778838123	Not Sig	4692.572888	-0.113535733	0.107380008	1.112770213	0.291480557	0.775514897	Not Sig	42136	NA	2	2	19	NA	-1	NA	-1
AGPAT4	NW_005081574.1	3533620	3602502	Adult Female	Hyp	Adult Female Brain	671.0418868	-0.189796261	0.10566941	3.208635578	0.073250544	0.156158867	Not Sig	1650.528343	-0.107656635	0.148966074	0.52322383	0.469469719	0.998912819	Not Sig	68882	NA	NA	NA	10	95298.92	0.265186051	11333.716	0.323541667
AGPAT4	NW_005081574.1	3533620	3602502	Adult Female	AMV	Adult Female Brain	180.4828727	-0.518990927	0.183085595	7.965043737	0.004768934	0.014845898	Sig	370.8803681	-0.103697114	0.184746845	0.315585968	0.57427247	0.983434407	Not Sig	68882	NA	NA	NA	10	95298.92	0.265186051	11333.716	0.323541667
AGPAT4	NW_005081574.1	3533620	3602502	Adult Male	Heart	Adult Male Horton et al	22.10220413	-0.598507692	0.267320694	4.531729777	0.033271971	0.06059001	Not Sig	NA	NA	NA	NA	NA	NA	NA	68882	NA	NA	NA	10	95298.92	0.265186051	11333.716	0.323541667
AGPAT4	NW_005081574.1	3533620	3602502	Adult Male	Liver	Adult Male Horton et al	12.49234782	-1.015516437	0.423189073	5.200342751	0.022582435	0.04789551	Sig	NA	NA	NA	NA	NA	NA	NA	68882	NA	NA	NA	10	95298.92	0.265186051	11333.716	0.323541667
AGPAT4	NW_005081574.1	3533620	3602502	Adult Male	Hyp	Adult Male Brain	325.674917	-0.216892748	0.063525501	11.6469352	0.000643084	0.002025522	Sig	946.1121692	-0.04724056	0.141176191	0.112036012	0.737837965	0.989305346	Not Sig	68882	NA	NA	NA	10	95298.92	0.265186051	11333.716	0.323541667
AGPAT4	NW_005081574.1	3533620	3602502	Adult Male	AMV	Adult Male Brain	72.76852634	-0.239458386	0.154799485	2.366478059	0.123966449	0.20747025	Not Sig	245.3602976	-0.286408536	0.176550618	2.633282033	0.104645199	0.694908031	Not Sig	68882	NA	NA	NA	10	95298.92	0.265186051	11333.716	0.323541667
AGPAT4	NW_005081574.1	3533620	3602502	Nestling Female	Hyp	Nestling Female Brain	946.2526616	-0.152407022	0.061517721	6.119757897	0.013367911	0.030267519	Sig	2685.441731	-0.526439682	0.231572436	5.140181335	0.023378206	0.424911564	Not Sig	68882	NA	NA	NA	10	95298.92	0.265186051	11333.716	0.323541667
AGPAT4	NW_005081574.1	3533620	3602502	Nestling Female	AMV	Nestling Female Brain	502.8665698	-0.20189755	0.104028445	3.744781502	0.052972653	0.109434522	Not Sig	1120.681921	-0.103895317	0.211068118	0.242646747	0.622300996	0.996634902	Not Sig	68882	NA	NA	NA	10	95298.92	0.265186051	11333.716	0.323541667
AGPAT4	NW_005081574.1	3533620	3602502	Nestling Male	Hyp	Nestling Male Brain	1687.678776	-0.382937039	0.072502894	27.71225899	1.41e-07	1.44e-06	Sig	3395.256166	0.479508976	0.28900617	2.778378967	0.095544829	0.899156401	Not Sig	68882	NA	NA	NA	10	95298.92	0.265186051	11333.716	0.323541667
AGPAT4	NW_005081574.1	3533620	3602502	Nestling Male	AMV	Nestling Male Brain	464.8451363	-0.182216421	0.128621207	1.990444301	0.158294431	0.293085396	Not Sig	1177.056684	-0.115175581	0.203487373	0.318758816	0.572354507	0.889229809	Not Sig	68882	NA	NA	NA	10	95298.92	0.265186051	11333.716	0.323541667
AGPAT5	NW_005081876.1	117210	171658	Adult Female	Hyp	Adult Female Brain	2109.497244	-0.35224623	0.057147809	37.89353022	7.47e-10	9.35e-09	Sig	13518.88176	-0.267745214	0.095479938	7.896386498	0.004953365	0.342053289	Not Sig	54448	NA	NA	1	13	NA	-1	NA	-1
AGPAT5	NW_005081876.1	117210	171658	Adult Female	AMV	Adult Female Brain	2983.651251	-0.377093112	0.049722276	57.35990542	3.63e-14	5.73e-13	Sig	18714.63195	-0.112054104	0.075327201	2.217387634	0.136463794	0.808274279	Not Sig	54448	NA	NA	1	13	NA	-1	NA	-1
AGPAT5	NW_005081876.1	117210	171658	Adult Male	Heart	Adult Male Horton et al	239.8285952	0.344980791	0.054622513	39.77655371	2.85e-10	1.54e-09	Sig	NA	NA	NA	NA	NA	NA	NA	54448	NA	NA	1	13	NA	-1	NA	-1
AGPAT5	NW_005081876.1	117210	171658	Adult Male	Liver	Adult Male Horton et al	142.2200398	0.454099951	0.083317591	29.4445831	5.75e-08	3.2e-07	Sig	NA	NA	NA	NA	NA	NA	NA	54448	NA	NA	1	13	NA	-1	NA	-1
AGPAT5	NW_005081876.1	117210	171658	Adult Male	Hyp	Adult Male Brain	1207.9203	-0.183585421	0.038146374	23.14235498	1.5e-06	7.19e-06	Sig	8281.227042	-0.023779743	0.043419106	0.300089785	0.583826139	0.981669138	Not Sig	54448	NA	NA	1	13	NA	-1	NA	-1
AGPAT5	NW_005081876.1	117210	171658	Adult Male	AMV	Adult Male Brain	1586.973646	-0.147643021	0.030698495	23.12668252	1.52e-06	6.78e-06	Sig	10919.58506	-0.010033872	0.045293608	0.049111446	0.8246167	0.979271722	Not Sig	54448	NA	NA	1	13	NA	-1	NA	-1
AGPAT5	NW_005081876.1	117210	171658	Nestling Female	Hyp	Nestling Female Brain	1826.508905	-0.242169583	0.044878363	29.06280148	7.01e-08	4.5e-07	Sig	11242.61567	-0.151194402	0.063352635	5.693417887	0.017028657	0.381123214	Not Sig	54448	NA	NA	1	13	NA	-1	NA	-1
AGPAT5	NW_005081876.1	117210	171658	Nestling Female	AMV	Nestling Female Brain	2327.711518	-0.409151964	0.047004675	75.5364395	3.59e-18	1.06e-16	Sig	12555.41707	-0.093938944	0.117690426	0.637934259	0.424459823	0.996634902	Not Sig	54448	NA	NA	1	13	NA	-1	NA	-1
AGPAT5	NW_005081876.1	117210	171658	Nestling Male	Hyp	Nestling Male Brain	1874.054724	-0.186580167	0.060035926	9.634220749	0.001909852	0.007563291	Sig	12184.58733	-0.119784897	0.057740696	4.28789918	0.038384567	0.711171452	Not Sig	54448	NA	NA	1	13	NA	-1	NA	-1
AGPAT5	NW_005081876.1	117210	171658	Nestling Male	AMV	Nestling Male Brain	2496.993174	-0.242413902	0.061044028	15.72964413	7.31e-05	0.000427274	Sig	13637.31951	-0.073231805	0.100551863	0.528795084	0.467113872	0.850219545	Not Sig	54448	NA	NA	1	13	NA	-1	NA	-1
AGT	NW_005081653.1	922303	933218	Adult Female	Hyp	Adult Female Brain	37920.04754	-0.718385868	0.025927544	760.248962	2.37e-167	1.25e-164	Sig	111255.3527	-0.385076225	0.076973582	25.155696	5.29e-07	0.000431776	Sig	10915	NA	NA	3	25	101557	0.162672901	16216.7	0.459459459
AGT	NW_005081653.1	922303	933218	Adult Female	AMV	Adult Female Brain	53394.45018	-0.460659243	0.021338054	464.1723946	5.94e-103	3.19e-100	Sig	150389.6418	-0.240964399	0.100785492	5.738595757	0.016596056	0.420001086	Not Sig	10915	NA	NA	3	25	101557	0.162672901	16216.7	0.459459459
AGT	NW_005081653.1	922303	933218	Adult Male	Heart	Adult Male Horton et al	4.208933913	-0.165631242	1.405630525	0.009216192	0.923519779	0.955555752	Not Sig	NA	NA	NA	NA	NA	NA	NA	10915	NA	NA	3	25	101557	0.162672901	16216.7	0.459459459
AGT	NW_005081653.1	922303	933218	Adult Male	Liver	Adult Male Horton et al	2978.091054	0.321472127	0.064733435	24.38219803	7.9e-07	3.88e-06	Sig	NA	NA	NA	NA	NA	NA	NA	10915	NA	NA	3	25	101557	0.162672901	16216.7	0.459459459
AGT	NW_005081653.1	922303	933218	Adult Male	Hyp	Adult Male Brain	16190.45204	-0.771489351	0.039290718	380.7335591	8.61e-85	1.29e-82	Sig	48923.6173	-0.376955862	0.055620137	46.01290163	1.17e-11	6.44e-09	Sig	10915	NA	NA	3	25	101557	0.162672901	16216.7	0.459459459
AGT	NW_005081653.1	922303	933218	Adult Male	AMV	Adult Male Brain	20326.44287	-0.505907374	0.041124914	150.3389773	1.46e-34	5.46e-33	Sig	59828.9873	-0.302423401	0.069759344	18.82922638	1.43e-05	0.004121312	Sig	10915	NA	NA	3	25	101557	0.162672901	16216.7	0.459459459
AGT	NW_005081653.1	922303	933218	Nestling Female	Hyp	Nestling Female Brain	16660.62216	-0.591729619	0.02522415	546.7265317	6.49e-121	2.24e-118	Sig	50597.57457	-0.392663605	0.166545544	5.541657297	0.018568989	0.391212181	Not Sig	10915	NA	NA	3	25	101557	0.162672901	16216.7	0.459459459
AGT	NW_005081653.1	922303	933218	Nestling Female	AMV	Nestling Female Brain	18012.90002	-0.854614614	0.047410298	319.6987737	1.68e-71	1.74e-68	Sig	46105.47519	-0.209337581	0.156129495	1.801985445	0.179472649	0.996634902	Not Sig	10915	NA	NA	3	25	101557	0.162672901	16216.7	0.459459459
AGT	NW_005081653.1	922303	933218	Nestling Male	Hyp	Nestling Male Brain	15510.06764	-0.616962968	0.053868824	129.9724265	4.16e-30	3.24e-28	Sig	50405.92447	-0.425655559	0.183007574	5.325252411	0.021018564	0.598598112	Not Sig	10915	NA	NA	3	25	101557	0.162672901	16216.7	0.459459459
AGT	NW_005081653.1	922303	933218	Nestling Male	AMV	Nestling Male Brain	19601.69927	-0.848007231	0.042860796	385.8327152	6.69e-86	6.92e-83	Sig	50541.09733	-0.179913609	0.167409815	1.145826969	0.284424418	0.770637308	Not Sig	10915	NA	NA	3	25	101557	0.162672901	16216.7	0.459459459
AHCTF1	NW_005081620.1	3180951	3189755	Adult Female	Hyp	Adult Female Brain	17.78891015	-1.719398022	0.596471203	7.416410047	0.006463164	0.020216624	Sig	1090.58493	-0.494625053	0.416398641	1.418755284	0.233608386	0.998912819	Not Sig	8804	NA	3	1	0	32914.1	0.995908825	5504.85	0.997920998
AHCTF1	NW_005081620.1	3180951	3189755	Adult Female	AMV	Adult Female Brain	10.12259233	0.223187603	0.702490258	0.096791396	0.7557146	0.853456866	Not Sig	534.3681782	0.670343885	0.415514536	2.544851119	0.110654341	0.77347281	Not Sig	8804	NA	3	1	0	32914.1	0.995908825	5504.85	0.997920998
AHCTF1	NW_005081620.1	3180951	3189755	Adult Male	Heart	Adult Male Horton et al	NA	NA	NA	NA	NA	NA	NA	NA	NA	NA	NA	NA	NA	NA	8804	NA	3	1	0	32914.1	0.995908825	5504.85	0.997920998
AHCTF1	NW_005081620.1	3180951	3189755	Adult Male	Liver	Adult Male Horton et al	NA	NA	NA	NA	NA	NA	NA	NA	NA	NA	NA	NA	NA	NA	8804	NA	3	1	0	32914.1	0.995908825	5504.85	0.997920998
AHCTF1	NW_005081620.1	3180951	3189755	Adult Male	Hyp	Adult Male Brain	9.181983433	-0.368200042	0.437462918	0.685091196	0.407839083	0.550059891	Not Sig	644.2006703	-0.099764201	0.165684824	0.362863289	0.546920322	0.981669138	Not Sig	8804	NA	3	1	0	32914.1	0.995908825	5504.85	0.997920998
AHCTF1	NW_005081620.1	3180951	3189755	Adult Male	AMV	Adult Male Brain	5.874279874	-0.761706463	0.634062241	1.252898431	0.262999614	0.388555927	Not Sig	378.2722778	0.25759792	0.15464476	2.763458419	0.09643955	0.685433747	Not Sig	8804	NA	3	1	0	32914.1	0.995908825	5504.85	0.997920998
AHCTF1	NW_005081620.1	3180951	3189755	Nestling Female	Hyp	Nestling Female Brain	14.6196278	-0.688180517	0.500928044	1.756877804	0.185014428	0.285931388	Not Sig	743.5210102	-0.904403799	0.357282601	6.306942676	0.012026606	0.327499067	Not Sig	8804	NA	3	1	0	32914.1	0.995908825	5504.85	0.997920998
AHCTF1	NW_005081620.1	3180951	3189755	Nestling Female	AMV	Nestling Female Brain	6.908584088	0.081659813	0.827226796	0.008467584	0.926682565	0.956247712	Not Sig	542.7994418	0.357162024	0.330140449	1.160679339	0.281324696	0.996634902	Not Sig	8804	NA	3	1	0	32914.1	0.995908825	5504.85	0.997920998
AHCTF1	NW_005081620.1	3180951	3189755	Nestling Male	Hyp	Nestling Male Brain	15.10612905	-0.382018927	0.517732965	0.525169364	0.46864487	0.665232263	Not Sig	982.9206624	-0.047921255	0.400834004	0.014272206	0.904905907	1	Not Sig	8804	NA	3	1	0	32914.1	0.995908825	5504.85	0.997920998
AHCTF1	NW_005081620.1	3180951	3189755	Nestling Male	AMV	Nestling Male Brain	10.64108684	-0.049402261	0.753807013	0.003627175	0.951975613	0.982504736	Not Sig	515.9113298	0.367604943	0.33117263	1.247043386	0.264117927	0.758573518	Not Sig	8804	NA	3	1	0	32914.1	0.995908825	5504.85	0.997920998
AHI1	NW_005081596.1	315199	398813	Adult Female	Hyp	Adult Female Brain	353.842723	0.03000656	0.136515797	0.04803302	0.826522012	0.911515881	Not Sig	1138.519352	0.131530493	0.130253561	1.017190033	0.31318647	0.998912819	Not Sig	83614	NA	3	10	14	66118.16	0.775686733	13585.62	0.457899775
AHI1	NW_005081596.1	315199	398813	Adult Female	AMV	Adult Female Brain	189.1106807	0.478905677	0.216491063	4.749217652	0.029311618	0.072088191	Not Sig	631.3239419	0.12901202	0.12527512	1.057565473	0.303771102	0.920944071	Not Sig	83614	NA	3	10	14	66118.16	0.775686733	13585.62	0.457899775
AHI1	NW_005081596.1	315199	398813	Adult Male	Heart	Adult Male Horton et al	40.97615952	0.208428522	0.499318284	0.137387218	0.710892412	0.794472786	Not Sig	NA	NA	NA	NA	NA	NA	NA	83614	NA	3	10	14	66118.16	0.775686733	13585.62	0.457899775
AHI1	NW_005081596.1	315199	398813	Adult Male	Liver	Adult Male Horton et al	15.09486017	-1.147501829	0.877776743	1.056363204	0.304046122	0.433252905	Not Sig	NA	NA	NA	NA	NA	NA	NA	83614	NA	3	10	14	66118.16	0.775686733	13585.62	0.457899775
AHI1	NW_005081596.1	315199	398813	Adult Male	Hyp	Adult Male Brain	131.0555056	0.041426081	0.107917283	0.146722084	0.701687742	0.812968618	Not Sig	523.3464533	-0.004448707	0.069051526	0.004725406	0.945195314	0.992784155	Not Sig	83614	NA	3	10	14	66118.16	0.775686733	13585.62	0.457899775
AHI1	NW_005081596.1	315199	398813	Adult Male	AMV	Adult Male Brain	64.0234793	0.334249289	0.173585454	3.648172846	0.056130758	0.104657349	Not Sig	266.5454931	-0.015344861	0.128369768	0.014570568	0.903921842	0.989706605	Not Sig	83614	NA	3	10	14	66118.16	0.775686733	13585.62	0.457899775
AHI1	NW_005081596.1	315199	398813	Nestling Female	Hyp	Nestling Female Brain	279.9025677	-0.043736828	0.118384446	0.134847194	0.713458309	0.805943645	Not Sig	931.7369178	0.114494811	0.098032873	1.364074444	0.242832591	0.885522112	Not Sig	83614	NA	3	10	14	66118.16	0.775686733	13585.62	0.457899775
AHI1	NW_005081596.1	315199	398813	Nestling Female	AMV	Nestling Female Brain	193.5942719	-0.062898302	0.18146989	0.117678267	0.731566367	0.836653248	Not Sig	572.1871038	0.187711547	0.140961189	1.769039494	0.183500994	0.996634902	Not Sig	83614	NA	3	10	14	66118.16	0.775686733	13585.62	0.457899775
AHI1	NW_005081596.1	315199	398813	Nestling Male	Hyp	Nestling Male Brain	245.7614617	-0.019946938	0.133555287	0.022243523	0.881441092	0.937174235	Not Sig	989.8056368	-0.313572458	0.125948718	6.13758552	0.013233789	0.519498818	Not Sig	83614	NA	3	10	14	66118.16	0.775686733	13585.62	0.457899775
AHI1	NW_005081596.1	315199	398813	Nestling Male	AMV	Nestling Male Brain	187.5047487	-0.072813206	0.187345164	0.148945604	0.69954502	0.822760336	Not Sig	671.0524862	-0.207851635	0.176948587	1.368289872	0.242105925	0.743875894	Not Sig	83614	NA	3	10	14	66118.16	0.775686733	13585.62	0.457899775
AHSA2P	NW_005081577.1	3802749	3812702	Adult Female	Hyp	Adult Female Brain	NA	NA	NA	NA	NA	NA	NA	6705.475521	-0.318218939	0.131249912	5.905797973	0.015091128	0.560312699	Not Sig	9953	NA	1	1	31	90092.1	0.300798753	4909.1	0.366177498
AHSA2P	NW_005081577.1	3802749	3812702	Adult Female	AMV	Adult Female Brain	NA	NA	NA	NA	NA	NA	NA	5652.441034	-0.205586041	0.141125158	2.129588526	0.144479536	0.82087378	Not Sig	9953	NA	1	1	31	90092.1	0.300798753	4909.1	0.366177498
AHSA2P	NW_005081577.1	3802749	3812702	Adult Male	Heart	Adult Male Horton et al	135.1252254	0.28964796	0.06830973	17.92096647	2.3e-05	7.11e-05	Sig	NA	NA	NA	NA	NA	NA	NA	9953	NA	1	1	31	90092.1	0.300798753	4909.1	0.366177498
AHSA2P	NW_005081577.1	3802749	3812702	Adult Male	Liver	Adult Male Horton et al	215.385421	0.361498946	0.060651267	35.39450307	2.69e-09	1.69e-08	Sig	NA	NA	NA	NA	NA	NA	NA	9953	NA	1	1	31	90092.1	0.300798753	4909.1	0.366177498
AHSA2P	NW_005081577.1	3802749	3812702	Adult Male	Hyp	Adult Male Brain	617.8657469	-0.369464017	0.059753154	38.09134088	6.75e-10	4.93e-09	Sig	2844.670536	-0.093468983	0.12429751	0.56600844	0.45184943	0.970132487	Not Sig	9953	NA	1	1	31	90092.1	0.300798753	4909.1	0.366177498
AHSA2P	NW_005081577.1	3802749	3812702	Adult Male	AMV	Adult Male Brain	474.0562421	-0.276955072	0.068047795	16.50385358	4.86e-05	0.00017392	Sig	2520.599299	-0.100879744	0.109372619	0.851576369	0.356106773	0.882689646	Not Sig	9953	NA	1	1	31	90092.1	0.300798753	4909.1	0.366177498
AHSA2P	NW_005081577.1	3802749	3812702	Nestling Female	Hyp	Nestling Female Brain	NA	NA	NA	NA	NA	NA	NA	3933.948259	-0.080326051	0.08529369	0.886768405	0.346354545	0.94334723	Not Sig	9953	NA	1	1	31	90092.1	0.300798753	4909.1	0.366177498
AHSA2P	NW_005081577.1	3802749	3812702	Nestling Female	AMV	Nestling Female Brain	NA	NA	NA	NA	NA	NA	NA	4993.943062	-0.19793943	0.161119704	1.512459723	0.218764138	0.996634902	Not Sig	9953	NA	1	1	31	90092.1	0.300798753	4909.1	0.366177498
AHSA2P	NW_005081577.1	3802749	3812702	Nestling Male	Hyp	Nestling Male Brain	NA	NA	NA	NA	NA	NA	NA	4151.753634	-0.145906336	0.084213981	2.988206394	0.08387302	0.889104158	Not Sig	9953	NA	1	1	31	90092.1	0.300798753	4909.1	0.366177498
AHSA2P	NW_005081577.1	3802749	3812702	Nestling Male	AMV	Nestling Male Brain	NA	NA	NA	NA	NA	NA	NA	4704.000084	-0.084767668	0.143461579	0.347881404	0.555314873	0.884832197	Not Sig	9953	NA	1	1	31	90092.1	0.300798753	4909.1	0.366177498
AIDA	NW_005081821.1	328044	363487	Adult Female	Hyp	Adult Female Brain	984.7136278	-0.206020818	0.07714065	7.121696564	0.007615661	0.023403682	Sig	4538.497367	-0.110987683	0.084557946	1.726321362	0.188881376	0.998912819	Not Sig	35443	NA	NA	1	5	75674.3	0.581855965	26838.13333	0.11936937
AIDA	NW_005081821.1	328044	363487	Adult Female	AMV	Adult Female Brain	568.5973428	-0.187038529	0.104381213	3.202995892	0.073503509	0.157885538	Not Sig	2326.36975	0.08127399	0.064031785	1.608310308	0.204729483	0.86566271	Not Sig	35443	NA	NA	1	5	75674.3	0.581855965	26838.13333	0.11936937
AIDA	NW_005081821.1	328044	363487	Adult Male	Heart	Adult Male Horton et al	25.15240009	0.20146272	0.210426279	0.874713209	0.349653789	0.453449067	Not Sig	NA	NA	NA	NA	NA	NA	NA	35443	NA	NA	1	5	75674.3	0.581855965	26838.13333	0.11936937
AIDA	NW_005081821.1	328044	363487	Adult Male	Liver	Adult Male Horton et al	45.20254146	0.336945813	0.147506442	5.095854877	0.02398309	0.050162651	Not Sig	NA	NA	NA	NA	NA	NA	NA	35443	NA	NA	1	5	75674.3	0.581855965	26838.13333	0.11936937
AIDA	NW_005081821.1	328044	363487	Adult Male	Hyp	Adult Male Brain	509.8967661	-0.15108772	0.049230141	9.415021263	0.002152151	0.00608619	Sig	2326.814443	0.040342935	0.044151482	0.834549402	0.360960312	0.964851606	Not Sig	35443	NA	NA	1	5	75674.3	0.581855965	26838.13333	0.11936937
AIDA	NW_005081821.1	328044	363487	Adult Male	AMV	Adult Male Brain	237.3008273	-0.005056365	0.099563176	0.002562283	0.959629126	0.979370233	Not Sig	1095.912412	-0.046504161	0.062064382	0.561843619	0.453518373	0.911510388	Not Sig	35443	NA	NA	1	5	75674.3	0.581855965	26838.13333	0.11936937
AIDA	NW_005081821.1	328044	363487	Nestling Female	Hyp	Nestling Female Brain	1108.998158	-0.131869959	0.04434052	8.842875503	0.002942352	0.007904712	Sig	4868.346241	-0.097763768	0.054821695	3.179849172	0.074551611	0.671148447	Not Sig	35443	NA	NA	1	5	75674.3	0.581855965	26838.13333	0.11936937
AIDA	NW_005081821.1	328044	363487	Nestling Female	AMV	Nestling Female Brain	835.5519372	-0.07132674	0.093755917	0.575498899	0.448082037	0.602292089	Not Sig	3548.95201	-0.086740473	0.077562787	1.251937915	0.263182669	0.996634902	Not Sig	35443	NA	NA	1	5	75674.3	0.581855965	26838.13333	0.11936937
AIDA	NW_005081821.1	328044	363487	Nestling Male	Hyp	Nestling Male Brain	1119.916957	-0.107375995	0.069768571	2.363954945	0.12416704	0.249475322	Not Sig	5164.484073	-0.119949787	0.070583298	2.877581537	0.089820832	0.897132462	Not Sig	35443	NA	NA	1	5	75674.3	0.581855965	26838.13333	0.11936937
AIDA	NW_005081821.1	328044	363487	Nestling Male	AMV	Nestling Male Brain	891.3136903	-0.071574901	0.095183503	0.563011069	0.453049575	0.631949205	Not Sig	3723.330326	-0.059740165	0.10323663	0.33405545	0.563280794	0.886340603	Not Sig	35443	NA	NA	1	5	75674.3	0.581855965	26838.13333	0.11936937
AIG1	NW_005081632.1	1000560	1088013	Adult Female	Hyp	Adult Female Brain	1041.857856	-0.180773457	0.094800058	3.613063767	0.057327417	0.127921688	Not Sig	3535.81548	0.022163898	0.07300499	0.092278453	0.761300315	0.998912819	Not Sig	87453	NA	1	3	8	73026.18	0.639723359	12642.74	0.427043919
AIG1	NW_005081632.1	1000560	1088013	Adult Female	AMV	Adult Female Brain	876.3506605	-0.239161259	0.08597996	7.718720634	0.005465111	0.016722306	Sig	3145.324728	-0.010318395	0.098078605	0.011076459	0.916181595	0.99695917	Not Sig	87453	NA	1	3	8	73026.18	0.639723359	12642.74	0.427043919
AIG1	NW_005081632.1	1000560	1088013	Adult Male	Heart	Adult Male Horton et al	185.7398613	-0.053926616	0.061523921	0.765733259	0.381540248	0.48749234	Not Sig	NA	NA	NA	NA	NA	NA	NA	87453	NA	1	3	8	73026.18	0.639723359	12642.74	0.427043919
AIG1	NW_005081632.1	1000560	1088013	Adult Male	Liver	Adult Male Horton et al	37.8491034	1.730962846	0.563829632	6.989539779	0.008198743	0.019297877	Sig	NA	NA	NA	NA	NA	NA	NA	87453	NA	1	3	8	73026.18	0.639723359	12642.74	0.427043919
AIG1	NW_005081632.1	1000560	1088013	Adult Male	Hyp	Adult Male Brain	501.9781499	-0.087792789	0.05376871	2.6631874	0.102694758	0.180962957	Not Sig	2258.772619	0.046699588	0.048999537	0.907896824	0.34067307	0.961430174	Not Sig	87453	NA	1	3	8	73026.18	0.639723359	12642.74	0.427043919
AIG1	NW_005081632.1	1000560	1088013	Adult Male	AMV	Adult Male Brain	400.0380957	-0.269053495	0.075866947	12.51668292	0.000403334	0.001230053	Sig	1820.191811	-0.00046057	0.058959141	0.000110188	0.991624705	0.995916231	Not Sig	87453	NA	1	3	8	73026.18	0.639723359	12642.74	0.427043919
AIG1	NW_005081632.1	1000560	1088013	Nestling Female	Hyp	Nestling Female Brain	986.2065561	-0.003724781	0.057931097	0.004119886	0.948821852	0.962747809	Not Sig	3365.460887	0.081226038	0.100189562	0.657127224	0.417575977	0.969654893	Not Sig	87453	NA	1	3	8	73026.18	0.639723359	12642.74	0.427043919
AIG1	NW_005081632.1	1000560	1088013	Nestling Female	AMV	Nestling Female Brain	981.7247068	-0.206066979	0.082093714	6.272998324	0.012259153	0.032122083	Sig	3049.083835	0.172743175	0.173776897	0.984858342	0.321002296	0.996634902	Not Sig	87453	NA	1	3	8	73026.18	0.639723359	12642.74	0.427043919
AIG1	NW_005081632.1	1000560	1088013	Nestling Male	Hyp	Nestling Male Brain	948.4330186	-0.089913747	0.073722595	1.484929261	0.223004883	0.393771143	Not Sig	3402.580048	0.082927817	0.113946786	0.530766439	0.466284811	0.995064234	Not Sig	87453	NA	1	3	8	73026.18	0.639723359	12642.74	0.427043919
AIG1	NW_005081632.1	1000560	1088013	Nestling Male	AMV	Nestling Male Brain	1014.379415	-0.109391247	0.07040869	2.411798937	0.120423909	0.234724568	Not Sig	2892.370485	0.247903581	0.167689958	2.204549466	0.137604091	0.668646448	Not Sig	87453	NA	1	3	8	73026.18	0.639723359	12642.74	0.427043919
AK9	NW_005081561.1	1372556	1432253	Adult Female	Hyp	Adult Female Brain	NA	NA	NA	NA	NA	NA	NA	NA	NA	NA	NA	NA	NA	NA	59697	NA	10	19	15	110219.25	0.100379895	16020.6	0.378426022
AK9	NW_005081561.1	1372556	1432253	Adult Female	AMV	Adult Female Brain	NA	NA	NA	NA	NA	NA	NA	NA	NA	NA	NA	NA	NA	NA	59697	NA	10	19	15	110219.25	0.100379895	16020.6	0.378426022
AK9	NW_005081561.1	1372556	1432253	Adult Male	Heart	Adult Male Horton et al	1.066921472	-0.188131484	2.949125839	0.006414989	0.936162791	100	Not Sig	NA	NA	NA	NA	NA	NA	NA	59697	NA	10	19	15	110219.25	0.100379895	16020.6	0.378426022
AK9	NW_005081561.1	1372556	1432253	Adult Male	Liver	Adult Male Horton et al	2.282899738	1.077379509	2.942073744	0.184276819	0.667723283	0.786926324	Not Sig	NA	NA	NA	NA	NA	NA	NA	59697	NA	10	19	15	110219.25	0.100379895	16020.6	0.378426022
AK9	NW_005081561.1	1372556	1432253	Adult Male	Hyp	Adult Male Brain	113.9314682	0.290351416	0.128283639	5.074070275	0.024286293	0.052462383	Not Sig	344.7898784	0.169532874	0.102252556	2.742257177	0.097726639	0.826593134	Not Sig	59697	NA	10	19	15	110219.25	0.100379895	16020.6	0.378426022
AK9	NW_005081561.1	1372556	1432253	Adult Male	AMV	Adult Male Brain	40.03743116	0.436635111	0.225807236	3.626164964	0.056877739	0.105861414	Not Sig	109.4225222	0.097796258	0.20416282	0.229280619	0.632057752	0.953038112	Not Sig	59697	NA	10	19	15	110219.25	0.100379895	16020.6	0.378426022
AK9	NW_005081561.1	1372556	1432253	Nestling Female	Hyp	Nestling Female Brain	NA	NA	NA	NA	NA	NA	NA	NA	NA	NA	NA	NA	NA	NA	59697	NA	10	19	15	110219.25	0.100379895	16020.6	0.378426022
AK9	NW_005081561.1	1372556	1432253	Nestling Female	AMV	Nestling Female Brain	NA	NA	NA	NA	NA	NA	NA	NA	NA	NA	NA	NA	NA	NA	59697	NA	10	19	15	110219.25	0.100379895	16020.6	0.378426022
AK9	NW_005081561.1	1372556	1432253	Nestling Male	Hyp	Nestling Male Brain	NA	NA	NA	NA	NA	NA	NA	NA	NA	NA	NA	NA	NA	NA	59697	NA	10	19	15	110219.25	0.100379895	16020.6	0.378426022
AK9	NW_005081561.1	1372556	1432253	Nestling Male	AMV	Nestling Male Brain	NA	NA	NA	NA	NA	NA	NA	NA	NA	NA	NA	NA	NA	NA	59697	NA	10	19	15	110219.25	0.100379895	16020.6	0.378426022
AKAP12	NW_005081596.1	1597993	1614727	Adult Female	Hyp	Adult Female Brain	4297.827679	-0.570102405	0.049884771	129.7337673	4.69e-30	2.46e-28	Sig	13749.11814	-0.225326139	0.104361221	4.678853086	0.030536129	0.697886759	Not Sig	16734	NA	27	16	7	96472.7	0.217319307	15851.95	0.487525988
AKAP12	NW_005081596.1	1597993	1614727	Adult Female	AMV	Adult Female Brain	948.0751784	-0.731485495	0.084078137	75.04871582	4.59e-18	9.67e-17	Sig	3745.082714	-0.689115939	0.249919918	7.640938214	0.005705823	0.245888681	Not Sig	16734	NA	27	16	7	96472.7	0.217319307	15851.95	0.487525988
AKAP12	NW_005081596.1	1597993	1614727	Adult Male	Heart	Adult Male Horton et al	2390.048331	-0.103104179	0.040059895	6.601692313	0.010188189	0.020765154	Sig	NA	NA	NA	NA	NA	NA	NA	16734	NA	27	16	7	96472.7	0.217319307	15851.95	0.487525988
AKAP12	NW_005081596.1	1597993	1614727	Adult Male	Liver	Adult Male Horton et al	195.7112107	-0.064872942	0.079809886	0.6546253	0.418463852	0.555024359	Not Sig	NA	NA	NA	NA	NA	NA	NA	16734	NA	27	16	7	96472.7	0.217319307	15851.95	0.487525988
AKAP12	NW_005081596.1	1597993	1614727	Adult Male	Hyp	Adult Male Brain	1595.044326	-0.422236051	0.034860949	146.4996194	1.01e-33	3.79e-32	Sig	5147.493939	-0.062452227	0.051203226	1.488628237	0.222429419	0.933702655	Not Sig	16734	NA	27	16	7	96472.7	0.217319307	15851.95	0.487525988
AKAP12	NW_005081596.1	1597993	1614727	Adult Male	AMV	Adult Male Brain	457.9522845	-0.465665671	0.070855832	42.97708059	5.54e-11	4.23e-10	Sig	1474.310221	-0.160993604	0.156052839	1.06597967	0.301855312	0.851887174	Not Sig	16734	NA	27	16	7	96472.7	0.217319307	15851.95	0.487525988
AKAP12	NW_005081596.1	1597993	1614727	Nestling Female	Hyp	Nestling Female Brain	5644.248208	-0.014019193	0.058078193	0.058099986	0.809524591	0.860119878	Not Sig	18150.85452	-0.148565442	0.059825097	6.164320592	0.013035243	0.341371445	Not Sig	16734	NA	27	16	7	96472.7	0.217319307	15851.95	0.487525988
AKAP12	NW_005081596.1	1597993	1614727	Nestling Female	AMV	Nestling Female Brain	3166.294414	-0.388534466	0.080050298	23.32990621	1.36e-06	8.88e-06	Sig	8882.816435	-0.135136367	0.230072816	0.345597937	0.556615672	0.996634902	Not Sig	16734	NA	27	16	7	96472.7	0.217319307	15851.95	0.487525988
AKAP12	NW_005081596.1	1597993	1614727	Nestling Male	Hyp	Nestling Male Brain	6359.856368	-0.013578695	0.047170414	0.082645517	0.773743793	0.885297327	Not Sig	20920.70716	-0.087339391	0.108987798	0.640502484	0.423528899	0.995064234	Not Sig	16734	NA	27	16	7	96472.7	0.217319307	15851.95	0.487525988
AKAP12	NW_005081596.1	1597993	1614727	Nestling Male	AMV	Nestling Male Brain	4267.064742	-0.409269983	0.060825653	45.03474861	1.94e-11	3.93e-10	Sig	12070.62548	0.011265971	0.310048949	0.001320788	0.971009142	0.999292185	Not Sig	16734	NA	27	16	7	96472.7	0.217319307	15851.95	0.487525988
AKAP7	NW_005081729.1	177236	255062	Adult Female	Hyp	Adult Female Brain	408.547417	-0.053152405	0.129418326	0.167650305	0.682208554	0.834692888	Not Sig	962.7397179	0.059743597	0.131638861	0.205748217	0.650120517	0.998912819	Not Sig	77826	NA	1	1	24	66816.04	0.765634132	8779.542	0.756987396
AKAP7	NW_005081729.1	177236	255062	Adult Female	Hyp	Adult Female Brain	408.547417	-0.053152405	0.129418326	0.167650305	0.682208554	0.834692888	Not Sig	962.7397179	0.059743597	0.131638861	0.205748217	0.650120517	0.998912819	Not Sig	77826	NA	1	2	24	66816.04	0.765634132	8779.542	0.756987396
AKAP7	NW_005081729.1	177236	255062	Adult Female	AMV	Adult Female Brain	794.5693336	0.142503758	0.083808446	2.889266277	0.089171527	0.182767596	Not Sig	1719.54009	0.11706496	0.105568243	1.227171846	0.267957752	0.906256628	Not Sig	77826	NA	1	1	24	66816.04	0.765634132	8779.542	0.756987396
AKAP7	NW_005081729.1	177236	255062	Adult Female	AMV	Adult Female Brain	794.5693336	0.142503758	0.083808446	2.889266277	0.089171527	0.182767596	Not Sig	1719.54009	0.11706496	0.105568243	1.227171846	0.267957752	0.906256628	Not Sig	77826	NA	1	2	24	66816.04	0.765634132	8779.542	0.756987396
AKAP7	NW_005081729.1	177236	255062	Adult Male	Heart	Adult Male Horton et al	400.2796337	-0.169211279	0.053299247	10.03976074	0.001531971	0.003630561	Sig	NA	NA	NA	NA	NA	NA	NA	77826	NA	1	1	24	66816.04	0.765634132	8779.542	0.756987396
AKAP7	NW_005081729.1	177236	255062	Adult Male	Heart	Adult Male Horton et al	400.2796337	-0.169211279	0.053299247	10.03976074	0.001531971	0.003630561	Sig	NA	NA	NA	NA	NA	NA	NA	77826	NA	1	2	24	66816.04	0.765634132	8779.542	0.756987396
AKAP7	NW_005081729.1	177236	255062	Adult Male	Liver	Adult Male Horton et al	38.19605609	0.264322493	0.166612333	2.453734679	0.117245615	0.196183256	Not Sig	NA	NA	NA	NA	NA	NA	NA	77826	NA	1	1	24	66816.04	0.765634132	8779.542	0.756987396
AKAP7	NW_005081729.1	177236	255062	Adult Male	Liver	Adult Male Horton et al	38.19605609	0.264322493	0.166612333	2.453734679	0.117245615	0.196183256	Not Sig	NA	NA	NA	NA	NA	NA	NA	77826	NA	1	2	24	66816.04	0.765634132	8779.542	0.756987396
AKAP7	NW_005081729.1	177236	255062	Adult Male	Hyp	Adult Male Brain	217.2160542	-0.00930292	0.087914645	0.011156425	0.915880699	0.945686621	Not Sig	655.1310294	-0.000113223	0.151744717	8.44e-07	0.999267043	0.999339934	Not Sig	77826	NA	1	1	24	66816.04	0.765634132	8779.542	0.756987396
AKAP7	NW_005081729.1	177236	255062	Adult Male	Hyp	Adult Male Brain	217.2160542	-0.00930292	0.087914645	0.011156425	0.915880699	0.945686621	Not Sig	655.1310294	-0.000113223	0.151744717	8.44e-07	0.999267043	0.999339934	Not Sig	77826	NA	1	2	24	66816.04	0.765634132	8779.542	0.756987396
AKAP7	NW_005081729.1	177236	255062	Adult Male	AMV	Adult Male Brain	454.7304278	0.058099529	0.053980901	1.157740632	0.281934607	0.41165028	Not Sig	1040.977527	0.043390727	0.100324594	0.18695672	0.665461676	0.956681008	Not Sig	77826	NA	1	1	24	66816.04	0.765634132	8779.542	0.756987396
AKAP7	NW_005081729.1	177236	255062	Adult Male	AMV	Adult Male Brain	454.7304278	0.058099529	0.053980901	1.157740632	0.281934607	0.41165028	Not Sig	1040.977527	0.043390727	0.100324594	0.18695672	0.665461676	0.956681008	Not Sig	77826	NA	1	2	24	66816.04	0.765634132	8779.542	0.756987396
AKAP7	NW_005081729.1	177236	255062	Nestling Female	Hyp	Nestling Female Brain	635.4784274	0.108626758	0.063185909	2.951128108	0.085817634	0.150072321	Not Sig	1538.784235	-0.031651615	0.096427158	0.107773468	0.742693391	0.993478163	Not Sig	77826	NA	1	1	24	66816.04	0.765634132	8779.542	0.756987396
AKAP7	NW_005081729.1	177236	255062	Nestling Female	Hyp	Nestling Female Brain	635.4784274	0.108626758	0.063185909	2.951128108	0.085817634	0.150072321	Not Sig	1538.784235	-0.031651615	0.096427158	0.107773468	0.742693391	0.993478163	Not Sig	77826	NA	1	2	24	66816.04	0.765634132	8779.542	0.756987396
AKAP7	NW_005081729.1	177236	255062	Nestling Female	AMV	Nestling Female Brain	1617.030532	-0.120060421	0.076901632	2.425788516	0.119353171	0.220590236	Not Sig	3668.583032	-0.261339662	0.146384793	3.195314435	0.073849567	0.996634902	Not Sig	77826	NA	1	1	24	66816.04	0.765634132	8779.542	0.756987396
AKAP7	NW_005081729.1	177236	255062	Nestling Female	AMV	Nestling Female Brain	1617.030532	-0.120060421	0.076901632	2.425788516	0.119353171	0.220590236	Not Sig	3668.583032	-0.261339662	0.146384793	3.195314435	0.073849567	0.996634902	Not Sig	77826	NA	1	2	24	66816.04	0.765634132	8779.542	0.756987396
AKAP7	NW_005081729.1	177236	255062	Nestling Male	Hyp	Nestling Male Brain	685.9876838	0.126802946	0.087622395	2.088339781	0.148427295	0.287643676	Not Sig	1679.013636	0.1006034	0.138062036	0.532267226	0.465655227	0.995064234	Not Sig	77826	NA	1	1	24	66816.04	0.765634132	8779.542	0.756987396
AKAP7	NW_005081729.1	177236	255062	Nestling Male	Hyp	Nestling Male Brain	685.9876838	0.126802946	0.087622395	2.088339781	0.148427295	0.287643676	Not Sig	1679.013636	0.1006034	0.138062036	0.532267226	0.465655227	0.995064234	Not Sig	77826	NA	1	2	24	66816.04	0.765634132	8779.542	0.756987396
AKAP7	NW_005081729.1	177236	255062	Nestling Male	AMV	Nestling Male Brain	1849.453831	-0.027517162	0.086422128	0.100811608	0.750857838	0.848441731	Not Sig	4081.711601	-0.028919865	0.182471993	0.025089566	0.874144086	0.97785055	Not Sig	77826	NA	1	1	24	66816.04	0.765634132	8779.542	0.756987396
AKAP7	NW_005081729.1	177236	255062	Nestling Male	AMV	Nestling Male Brain	1849.453831	-0.027517162	0.086422128	0.100811608	0.750857838	0.848441731	Not Sig	4081.711601	-0.028919865	0.182471993	0.025089566	0.874144086	0.97785055	Not Sig	77826	NA	1	2	24	66816.04	0.765634132	8779.542	0.756987396
AKIRIN2	NW_005081569.1	4127106	4132833	Adult Female	Hyp	Adult Female Brain	49.83696789	-0.239038803	0.532522666	0.154739898	0.694046279	0.842009802	Not Sig	7243.138532	0.022854121	0.05084137	0.201984087	0.653124092	0.998912819	Not Sig	5727	NA	NA	NA	26	51609.3	0.945256185	3575.1	0.598881901
AKIRIN2	NW_005081569.1	4127106	4132833	Adult Female	AMV	Adult Female Brain	70.73448763	0.98272505	1.058513821	0.564771644	0.452344038	0.614181412	Not Sig	7282.925457	0.010537257	0.058942389	0.031954371	0.858127838	0.994572471	Not Sig	5727	NA	NA	NA	26	51609.3	0.945256185	3575.1	0.598881901
AKIRIN2	NW_005081569.1	4127106	4132833	Adult Male	Heart	Adult Male Horton et al	1.545601516	0.685585761	1.52022492	0.153124406	0.695567268	0.779359698	Not Sig	NA	NA	NA	NA	NA	NA	NA	5727	NA	NA	NA	26	51609.3	0.945256185	3575.1	0.598881901
AKIRIN2	NW_005081569.1	4127106	4132833	Adult Male	Liver	Adult Male Horton et al	1.959602165	-1.219664143	1.147760342	0.823965369	0.36402333	0.497734165	Not Sig	NA	NA	NA	NA	NA	NA	NA	5727	NA	NA	NA	26	51609.3	0.945256185	3575.1	0.598881901
AKIRIN2	NW_005081569.1	4127106	4132833	Adult Male	Hyp	Adult Male Brain	1.466399896	2.675266295	2.411723475	1.063817959	0.302346009	0.435113546	Not Sig	3499.311691	0.014584164	0.04065052	0.129522471	0.718927672	0.987192483	Not Sig	5727	NA	NA	NA	26	51609.3	0.945256185	3575.1	0.598881901
AKIRIN2	NW_005081569.1	4127106	4132833	Adult Male	AMV	Adult Male Brain	1.67132571	2.160724992	2.616024247	0.557787648	0.455153009	0.606484137	Not Sig	3258.028433	0.081311499	0.051082484	2.53192866	0.11156378	0.704685558	Not Sig	5727	NA	NA	NA	26	51609.3	0.945256185	3575.1	0.598881901
AKIRIN2	NW_005081569.1	4127106	4132833	Nestling Female	Hyp	Nestling Female Brain	35.44107784	-1.316387365	0.969077898	1.282727932	0.257392438	0.373309032	Not Sig	6580.072496	0.100581444	0.097110446	1.072514473	0.300378176	0.920677675	Not Sig	5727	NA	NA	NA	26	51609.3	0.945256185	3575.1	0.598881901
AKIRIN2	NW_005081569.1	4127106	4132833	Nestling Female	AMV	Nestling Female Brain	35.35515065	1.064996317	0.782057075	1.116970891	0.290571636	0.444226947	Not Sig	6845.251265	-0.01361898	0.115739911	0.013860406	0.906281417	0.996634902	Not Sig	5727	NA	NA	NA	26	51609.3	0.945256185	3575.1	0.598881901
AKIRIN2	NW_005081569.1	4127106	4132833	Nestling Male	Hyp	Nestling Male Brain	22.57801253	-0.297104497	0.57794885	0.222390579	0.637224423	0.802298454	Not Sig	6625.865913	0.004605012	0.092371833	0.002493528	0.960173993	1	Not Sig	5727	NA	NA	NA	26	51609.3	0.945256185	3575.1	0.598881901
AKIRIN2	NW_005081569.1	4127106	4132833	Nestling Male	AMV	Nestling Male Brain	51.81771265	-3.802496	1.08179969	7.949725594	0.004809467	0.01632065	Sig	6689.288239	0.030244866	0.091324335	0.109807739	0.740363128	0.942674966	Not Sig	5727	NA	NA	NA	26	51609.3	0.945256185	3575.1	0.598881901
AKT3	NW_005081620.1	1871641	2006775	Adult Female	Hyp	Adult Female Brain	2635.453821	-0.62967183	0.142798602	19.07995668	1.25e-05	7.24e-05	Sig	10452.63182	-0.28788484	0.202726402	2.025476416	0.154680408	0.998912819	Not Sig	135134	NA	NA	1	13	112797.8	0.115770505	14945.0875	0.331546014
AKT3	NW_005081620.1	1871641	2006775	Adult Female	AMV	Adult Female Brain	5004.810149	-0.32513224	0.056894148	32.48984364	1.2e-08	1.04e-07	Sig	18751.61196	0.096889894	0.122661431	0.622553405	0.430100004	0.959878654	Not Sig	135134	NA	NA	1	13	112797.8	0.115770505	14945.0875	0.331546014
AKT3	NW_005081620.1	1871641	2006775	Adult Male	Heart	Adult Male Horton et al	94.57518159	0.296851031	0.098233155	9.023384097	0.002665475	0.006083471	Sig	NA	NA	NA	NA	NA	NA	NA	135134	NA	NA	1	13	112797.8	0.115770505	14945.0875	0.331546014
AKT3	NW_005081620.1	1871641	2006775	Adult Male	Liver	Adult Male Horton et al	30.02569473	0.389138579	0.174669661	4.81908987	0.028146203	0.057727043	Not Sig	NA	NA	NA	NA	NA	NA	NA	135134	NA	NA	1	13	112797.8	0.115770505	14945.0875	0.331546014
AKT3	NW_005081620.1	1871641	2006775	Adult Male	Hyp	Adult Male Brain	1108.419212	-0.236066059	0.038605295	37.36236358	9.81e-10	6.88e-09	Sig	4584.5959	-0.158318851	0.042182297	14.10418272	0.000172959	0.018240496	Sig	135134	NA	NA	1	13	112797.8	0.115770505	14945.0875	0.331546014
AKT3	NW_005081620.1	1871641	2006775	Adult Male	AMV	Adult Male Brain	1806.956859	-0.185484977	0.028285975	42.99802088	5.48e-11	4.21e-10	Sig	6994.351793	-0.174409826	0.07061444	6.108902995	0.013450259	0.403763145	Not Sig	135134	NA	NA	1	13	112797.8	0.115770505	14945.0875	0.331546014
AKT3	NW_005081620.1	1871641	2006775	Nestling Female	Hyp	Nestling Female Brain	1830.149269	0.078837801	0.319098881	0.056672018	0.811835447	0.860711623	Not Sig	8054.017518	-0.250542006	0.103829191	5.815574851	0.015884861	0.367395209	Not Sig	135134	NA	NA	1	13	112797.8	0.115770505	14945.0875	0.331546014
AKT3	NW_005081620.1	1871641	2006775	Nestling Female	AMV	Nestling Female Brain	2498.938291	-0.499690178	0.279510221	3.013918307	0.082552514	0.160604985	Not Sig	11066.31342	-0.526914643	0.25065284	4.430607153	0.035299949	0.996634902	Not Sig	135134	NA	NA	1	13	112797.8	0.115770505	14945.0875	0.331546014
AKT3	NW_005081620.1	1871641	2006775	Nestling Male	Hyp	Nestling Male Brain	1942.45813	-0.016864171	0.078903687	0.045338054	0.831383633	0.910834948	Not Sig	8920.302597	-0.185974776	0.110307237	2.825435385	0.092781729	0.897902777	Not Sig	135134	NA	NA	1	13	112797.8	0.115770505	14945.0875	0.331546014
AKT3	NW_005081620.1	1871641	2006775	Nestling Male	AMV	Nestling Male Brain	2533.237155	-0.463203691	0.253691719	3.170288306	0.074989208	0.159699239	Not Sig	13917.44269	-0.384638791	0.225245521	2.862949632	0.090641149	0.626373833	Not Sig	135134	NA	NA	1	13	112797.8	0.115770505	14945.0875	0.331546014
ALDH8A1	NW_005081596.1	143903	157035	Adult Female	Hyp	Adult Female Brain	20.39446077	-0.241795683	0.686941132	0.099444884	0.752496815	0.874806532	Not Sig	151.322538	-0.313189991	0.258080599	1.482272554	0.223419298	0.998912819	Not Sig	13132	NA	1	2	3	73957.8	0.627897915	13716.9	0.66995842
ALDH8A1	NW_005081596.1	143903	157035	Adult Female	AMV	Adult Female Brain	12.30748726	-0.624310529	0.763559852	0.578653535	0.446840577	0.61175218	Not Sig	112.7159631	-0.417055875	0.28887293	2.091973063	0.148074722	0.824884551	Not Sig	13132	NA	1	2	3	73957.8	0.627897915	13716.9	0.66995842
ALDH8A1	NW_005081596.1	143903	157035	Adult Male	Heart	Adult Male Horton et al	14.37402595	-0.204961985	0.213059641	0.900109368	0.342752387	0.448956016	Not Sig	NA	NA	NA	NA	NA	NA	NA	13132	NA	1	2	3	73957.8	0.627897915	13716.9	0.66995842
ALDH8A1	NW_005081596.1	143903	157035	Adult Male	Liver	Adult Male Horton et al	934.7797756	-0.837876189	0.070737097	137.3803385	9.96e-32	2.9e-30	Sig	NA	NA	NA	NA	NA	NA	NA	13132	NA	1	2	3	73957.8	0.627897915	13716.9	0.66995842
ALDH8A1	NW_005081596.1	143903	157035	Adult Male	Hyp	Adult Male Brain	4.034077528	-0.15347797	1.197873804	0.01167791	0.913944624	0.945686621	Not Sig	36.17730856	-0.365146858	0.254096092	2.063135606	0.150899379	0.901309303	Not Sig	13132	NA	1	2	3	73957.8	0.627897915	13716.9	0.66995842
ALDH8A1	NW_005081596.1	143903	157035	Adult Male	AMV	Adult Male Brain	4.025780458	-2.086066061	1.138026178	2.627377028	0.105035103	0.180701838	Not Sig	24.64073593	-0.050997352	0.305365365	0.027909139	0.867322615	0.986274164	Not Sig	13132	NA	1	2	3	73957.8	0.627897915	13716.9	0.66995842
ALDH8A1	NW_005081596.1	143903	157035	Nestling Female	Hyp	Nestling Female Brain	22.48512701	-0.347615229	0.527632999	0.358549707	0.549312797	0.675726418	Not Sig	139.2096828	0.194476617	0.220136484	0.780375082	0.377026451	0.957380218	Not Sig	13132	NA	1	2	3	73957.8	0.627897915	13716.9	0.66995842
ALDH8A1	NW_005081596.1	143903	157035	Nestling Female	AMV	Nestling Female Brain	18.60652747	-1.248436823	0.910698157	1.14649718	0.284283615	0.436548281	Not Sig	101.6620073	-0.045844715	0.264782535	0.030149721	0.862150948	0.996634902	Not Sig	13132	NA	1	2	3	73957.8	0.627897915	13716.9	0.66995842
ALDH8A1	NW_005081596.1	143903	157035	Nestling Male	Hyp	Nestling Male Brain	17.07689405	-0.824609074	0.670583149	1.108424377	0.292424711	0.491395138	Not Sig	161.51701	-0.592370392	0.198189205	8.765193827	0.003070334	0.266581355	Not Sig	13132	NA	1	2	3	73957.8	0.627897915	13716.9	0.66995842
ALDH8A1	NW_005081596.1	143903	157035	Nestling Male	AMV	Nestling Male Brain	15.03442762	-0.278150564	0.87901572	0.071015935	0.789863284	0.880935882	Not Sig	121.7165752	-0.316225057	0.184697272	2.892850774	0.088973363	0.621529918	Not Sig	13132	NA	1	2	3	73957.8	0.627897915	13716.9	0.66995842
ALK	NW_005081742.1	404906	709885	Adult Female	Hyp	Adult Female Brain	1428.218845	-0.339119369	0.069170881	23.96166784	9.83e-07	7.17e-06	Sig	4689.957237	0.002336125	0.110287863	0.000449289	0.983088964	0.998912819	Not Sig	304979	NA	4	3	9	78671.61875	0.527359731	23744.4625	0.169147731
ALK	NW_005081742.1	404906	709885	Adult Female	AMV	Adult Female Brain	851.9217051	-0.455741799	0.118769581	14.49681267	0.000140397	0.000598358	Sig	2438.620765	0.247468494	0.102905801	5.748013059	0.016507317	0.420001086	Not Sig	304979	NA	4	3	9	78671.61875	0.527359731	23744.4625	0.169147731
ALK	NW_005081742.1	404906	709885	Adult Male	Heart	Adult Male Horton et al	NA	NA	NA	NA	NA	NA	NA	NA	NA	NA	NA	NA	NA	NA	304979	NA	4	3	9	78671.61875	0.527359731	23744.4625	0.169147731
ALK	NW_005081742.1	404906	709885	Adult Male	Liver	Adult Male Horton et al	NA	NA	NA	NA	NA	NA	NA	NA	NA	NA	NA	NA	NA	NA	304979	NA	4	3	9	78671.61875	0.527359731	23744.4625	0.169147731
ALK	NW_005081742.1	404906	709885	Adult Male	Hyp	Adult Male Brain	597.0105693	-0.266647909	0.052015201	26.24318472	3.01e-07	1.61e-06	Sig	1928.845392	-0.072693911	0.065573548	1.229691575	0.267467028	0.949711687	Not Sig	304979	NA	4	3	9	78671.61875	0.527359731	23744.4625	0.169147731
ALK	NW_005081742.1	404906	709885	Adult Male	AMV	Adult Male Brain	236.1937969	-0.175738415	0.070474735	6.216333459	0.012657698	0.02817011	Sig	807.9505262	-0.194486652	0.116050712	2.811621413	0.093583746	0.682173729	Not Sig	304979	NA	4	3	9	78671.61875	0.527359731	23744.4625	0.169147731
ALK	NW_005081742.1	404906	709885	Nestling Female	Hyp	Nestling Female Brain	1680.65637	0.107249382	0.046064579	5.412796542	0.019989668	0.043601788	Sig	5584.056429	-0.044652763	0.137994243	0.104707944	0.746251436	0.993626211	Not Sig	304979	NA	4	3	9	78671.61875	0.527359731	23744.4625	0.169147731
ALK	NW_005081742.1	404906	709885	Nestling Female	AMV	Nestling Female Brain	835.932258	0.009382814	0.090680652	0.010652485	0.917795606	0.952776783	Not Sig	2585.30274	-0.096333152	0.170197601	0.320814029	0.571118854	0.996634902	Not Sig	304979	NA	4	3	9	78671.61875	0.527359731	23744.4625	0.169147731
ALK	NW_005081742.1	404906	709885	Nestling Male	Hyp	Nestling Male Brain	1546.268916	0.017321656	0.064138262	0.072782248	0.787328085	0.888997518	Not Sig	5857.436897	-0.206688812	0.161060899	1.635746501	0.200910065	0.986999268	Not Sig	304979	NA	4	3	9	78671.61875	0.527359731	23744.4625	0.169147731
ALK	NW_005081742.1	404906	709885	Nestling Male	AMV	Nestling Male Brain	887.8577157	-0.046203628	0.07998108	0.333216162	0.563771404	0.734890936	Not Sig	2739.126408	-0.086076228	0.155909764	0.303714834	0.581562871	0.892258178	Not Sig	304979	NA	4	3	9	78671.61875	0.527359731	23744.4625	0.169147731
ALKAL2	NW_005081609.1	581075	594005	Adult Female	Hyp	Adult Female Brain	344.6135861	-1.40976381	0.159625582	74.95252031	4.82e-18	1.3e-16	Sig	1290.453847	-0.630059596	0.153731881	16.88673131	3.97e-05	0.010993225	Sig	12930	NA	NA	NA	0	NA	-1	NA	-1
ALKAL2	NW_005081609.1	581075	594005	Adult Female	AMV	Adult Female Brain	350.4673331	-1.380023547	0.142389022	91.21278913	1.29e-21	3.22e-20	Sig	1269.127279	-0.594764694	0.125763571	22.49013833	2.11e-06	0.000904572	Sig	12930	NA	NA	NA	0	NA	-1	NA	-1
ALKAL2	NW_005081609.1	581075	594005	Adult Male	Heart	Adult Male Horton et al	11.75734749	-2.007760484	0.335454683	33.20177949	8.31e-09	3.95e-08	Sig	NA	NA	NA	NA	NA	NA	NA	12930	NA	NA	NA	0	NA	-1	NA	-1
ALKAL2	NW_005081609.1	581075	594005	Adult Male	Liver	Adult Male Horton et al	37.33609511	-1.31191704	0.163417969	62.84452523	2.24e-15	2.28e-14	Sig	NA	NA	NA	NA	NA	NA	NA	12930	NA	NA	NA	0	NA	-1	NA	-1
ALKAL2	NW_005081609.1	581075	594005	Adult Male	Hyp	Adult Male Brain	194.6613711	-1.28463411	0.085595266	226.9326675	2.78e-51	1.95e-49	Sig	775.2047727	-0.384817658	0.089462919	18.54386713	1.66e-05	0.002776084	Sig	12930	NA	NA	NA	0	NA	-1	NA	-1
ALKAL2	NW_005081609.1	581075	594005	Adult Male	AMV	Adult Male Brain	167.8199213	-1.145828756	0.119847064	89.87316801	2.54e-21	5.11e-20	Sig	703.4920442	-0.599584999	0.078191791	58.86119249	1.69e-14	1.6e-11	Sig	12930	NA	NA	NA	0	NA	-1	NA	-1
ALKAL2	NW_005081609.1	581075	594005	Nestling Female	Hyp	Nestling Female Brain	221.3512429	-1.539480079	0.135203219	125.3634697	4.24e-29	1.83e-27	Sig	959.3056239	-0.726848846	0.100980387	51.36201501	7.68e-13	2.71e-09	Sig	12930	NA	NA	NA	0	NA	-1	NA	-1
ALKAL2	NW_005081609.1	581075	594005	Nestling Female	AMV	Nestling Female Brain	185.9192895	-1.720120325	0.20514783	66.08173977	4.33e-16	1.02e-14	Sig	705.8192532	-0.542002127	0.167349406	10.51084511	0.00118676	0.283655017	Not Sig	12930	NA	NA	NA	0	NA	-1	NA	-1
ALKAL2	NW_005081609.1	581075	594005	Nestling Male	Hyp	Nestling Male Brain	199.7786568	-1.492180812	0.221891716	41.85113848	9.85e-11	1.82e-09	Sig	997.2020525	-0.612246705	0.126732611	22.80221087	1.8e-06	0.001724664	Sig	12930	NA	NA	NA	0	NA	-1	NA	-1
ALKAL2	NW_005081609.1	581075	594005	Nestling Male	AMV	Nestling Male Brain	193.6879244	-1.414006162	0.254322683	28.59903679	8.9e-08	9.91e-07	Sig	829.0026357	-0.429764406	0.209947726	4.103655973	0.042790589	0.54595608	Not Sig	12930	NA	NA	NA	0	NA	-1	NA	-1
AMD1	NW_005081561.1	826729	844066	Adult Female	Hyp	Adult Female Brain	3826.201648	-0.032046049	0.040777009	0.617474202	0.43198744	0.619398089	Not Sig	17516.81864	-0.142198952	0.082707105	2.963649524	0.085155537	0.938807663	Not Sig	17337	NA	NA	NA	11	83302.7	0.421488408	12050.42	0.575832142
AMD1	NW_005081561.1	826729	844066	Adult Female	AMV	Adult Female Brain	5366.494013	0.017071638	0.040144915	0.180723944	0.670751831	0.79495083	Not Sig	22563.50059	0.037218364	0.066661509	0.311480333	0.576773211	0.983434407	Not Sig	17337	NA	NA	NA	11	83302.7	0.421488408	12050.42	0.575832142
AMD1	NW_005081561.1	826729	844066	Adult Male	Heart	Adult Male Horton et al	256.579914	-0.132493193	0.072312699	3.328239755	0.068099721	0.113718646	Not Sig	NA	NA	NA	NA	NA	NA	NA	17337	NA	NA	NA	11	83302.7	0.421488408	12050.42	0.575832142
AMD1	NW_005081561.1	826729	844066	Adult Male	Liver	Adult Male Horton et al	136.4755113	-0.286313517	0.104621125	7.415595712	0.00646609	0.015610989	Sig	NA	NA	NA	NA	NA	NA	NA	17337	NA	NA	NA	11	83302.7	0.421488408	12050.42	0.575832142
AMD1	NW_005081561.1	826729	844066	Adult Male	Hyp	Adult Male Brain	2153.710482	0.087144413	0.038727182	5.055880702	0.024542506	0.052907205	Not Sig	10110.85692	0.178369285	0.045730544	15.17357615	9.81e-05	0.01169119	Sig	17337	NA	NA	NA	11	83302.7	0.421488408	12050.42	0.575832142
AMD1	NW_005081561.1	826729	844066	Adult Male	AMV	Adult Male Brain	2651.461183	0.157120789	0.030063193	27.29914266	1.74e-07	9.03e-07	Sig	12248.08963	0.184976644	0.056213742	10.79770597	0.00101626	0.089415922	Not Sig	17337	NA	NA	NA	11	83302.7	0.421488408	12050.42	0.575832142
AMD1	NW_005081561.1	826729	844066	Nestling Female	Hyp	Nestling Female Brain	1830.102129	0.247461843	0.039466031	39.26984574	3.69e-10	3.06e-09	Sig	7844.558217	-0.022685135	0.084540274	0.072006158	0.788437903	0.996728869	Not Sig	17337	NA	NA	NA	11	83302.7	0.421488408	12050.42	0.575832142
AMD1	NW_005081561.1	826729	844066	Nestling Female	AMV	Nestling Female Brain	2574.670487	0.277217992	0.052518908	27.78515977	1.36e-07	1.05e-06	Sig	9299.857983	0.266746069	0.114025484	5.44305166	0.019646316	0.996634902	Not Sig	17337	NA	NA	NA	11	83302.7	0.421488408	12050.42	0.575832142
AMD1	NW_005081561.1	826729	844066	Nestling Male	Hyp	Nestling Male Brain	2071.006359	0.235835313	0.046889706	25.2717801	4.98e-07	4.82e-06	Sig	8395.669988	0.182067122	0.093090539	3.842267471	0.049975893	0.768798316	Not Sig	17337	NA	NA	NA	11	83302.7	0.421488408	12050.42	0.575832142
AMD1	NW_005081561.1	826729	844066	Nestling Male	AMV	Nestling Male Brain	2867.71767	0.314542819	0.084410873	13.77300246	0.000206279	0.001046564	Sig	10376.80869	0.243895092	0.100279449	5.967323002	0.014573388	0.49045551	Not Sig	17337	NA	NA	NA	11	83302.7	0.421488408	12050.42	0.575832142
ANAPC1	NW_005081577.1	1297992	1322975	Adult Female	Hyp	Adult Female Brain	704.7340947	0.065101186	0.100575546	0.417341419	0.518266614	0.695914989	Not Sig	3676.869082	0.124746897	0.070970177	3.082021998	0.079162054	0.930809269	Not Sig	24983	NA	1	5	22	116387.3333	0.07591402	6017.87	0.491855928
ANAPC1	NW_005081577.1	1297992	1322975	Adult Female	AMV	Adult Female Brain	559.2191529	0.434937623	0.100260752	18.76114549	1.48e-05	7.72e-05	Sig	3030.918735	0.034460895	0.064196941	0.287971455	0.591523411	0.985201365	Not Sig	24983	NA	1	5	22	116387.3333	0.07591402	6017.87	0.491855928
ANAPC1	NW_005081577.1	1297992	1322975	Adult Male	Heart	Adult Male Horton et al	35.63672375	0.51587016	0.592887012	0.52874423	0.46713529	0.57973031	Not Sig	NA	NA	NA	NA	NA	NA	NA	24983	NA	1	5	22	116387.3333	0.07591402	6017.87	0.491855928
ANAPC1	NW_005081577.1	1297992	1322975	Adult Male	Liver	Adult Male Horton et al	42.69471534	0.022587707	0.493108882	0.001732616	0.966797879	0.983131311	Not Sig	NA	NA	NA	NA	NA	NA	NA	24983	NA	1	5	22	116387.3333	0.07591402	6017.87	0.491855928
ANAPC1	NW_005081577.1	1297992	1322975	Adult Male	Hyp	Adult Male Brain	213.5717429	-0.091720811	0.091344889	1.003561468	0.316450269	0.451703776	Not Sig	1366.062858	0.040307187	0.045373837	0.788968505	0.374412209	0.964851606	Not Sig	24983	NA	1	5	22	116387.3333	0.07591402	6017.87	0.491855928
ANAPC1	NW_005081577.1	1297992	1322975	Adult Male	AMV	Adult Male Brain	166.1986333	0.102863165	0.083021888	1.534153126	0.215490203	0.329055113	Not Sig	1042.496358	0.006638119	0.047207105	0.019851007	0.887953996	0.987795363	Not Sig	24983	NA	1	5	22	116387.3333	0.07591402	6017.87	0.491855928
ANAPC1	NW_005081577.1	1297992	1322975	Nestling Female	Hyp	Nestling Female Brain	814.4995376	0.233893747	0.067345564	12.01148352	0.000528738	0.001697526	Sig	4349.634044	0.099568108	0.055369607	3.233212434	0.072159011	0.662601566	Not Sig	24983	NA	1	5	22	116387.3333	0.07591402	6017.87	0.491855928
ANAPC1	NW_005081577.1	1297992	1322975	Nestling Female	AMV	Nestling Female Brain	712.9571984	-0.110076577	0.141283478	0.595730738	0.440211595	0.594802873	Not Sig	3796.799135	-0.108683513	0.128980841	0.711070945	0.399088513	0.996634902	Not Sig	24983	NA	1	5	22	116387.3333	0.07591402	6017.87	0.491855928
ANAPC1	NW_005081577.1	1297992	1322975	Nestling Male	Hyp	Nestling Male Brain	819.5830969	0.194663688	0.078064702	6.205094035	0.012738318	0.0367361	Sig	4655.98498	0.016901417	0.066835885	0.063981207	0.800310663	1	Not Sig	24983	NA	1	5	22	116387.3333	0.07591402	6017.87	0.491855928
ANAPC1	NW_005081577.1	1297992	1322975	Nestling Male	AMV	Nestling Male Brain	772.8321122	0.055136317	0.104027303	0.27951324	0.597020434	0.758396317	Not Sig	4061.721015	-0.117991403	0.132831699	0.785152019	0.375570086	0.815683773	Not Sig	24983	NA	1	5	22	116387.3333	0.07591402	6017.87	0.491855928
ANGEL2	NW_005081548.1	3501733	3517130	Adult Female	Hyp	Adult Female Brain	478.5186199	0.289414424	0.127270843	5.125641016	0.023574862	0.061329652	Not Sig	1882.677732	0.194141742	0.072555237	7.133254021	0.007566728	0.410016052	Not Sig	15397	NA	2	3	0	96972.4	0.210598091	34769.6	0.02962578
ANGEL2	NW_005081548.1	3501733	3517130	Adult Female	AMV	Adult Female Brain	376.8821608	-0.27090583	0.132102849	4.182978449	0.040831882	0.095541267	Not Sig	1560.024733	0.058873713	0.063581562	0.857905785	0.354325407	0.937027283	Not Sig	15397	NA	2	3	0	96972.4	0.210598091	34769.6	0.02962578
ANGEL2	NW_005081548.1	3501733	3517130	Adult Male	Heart	Adult Male Horton et al	157.8071863	0.54910511	0.07401917	54.64811664	1.44e-13	1.03e-12	Sig	NA	NA	NA	NA	NA	NA	NA	15397	NA	2	3	0	96972.4	0.210598091	34769.6	0.02962578
ANGEL2	NW_005081548.1	3501733	3517130	Adult Male	Liver	Adult Male Horton et al	146.9907766	0.451742023	0.086403716	27.0314655	2e-07	1.05e-06	Sig	NA	NA	NA	NA	NA	NA	NA	15397	NA	2	3	0	96972.4	0.210598091	34769.6	0.02962578
ANGEL2	NW_005081548.1	3501733	3517130	Adult Male	Hyp	Adult Male Brain	220.7580828	0.32205941	0.093158547	11.88090458	0.000567124	0.001818946	Sig	907.368201	0.102941814	0.05007724	4.22377602	0.039861359	0.630992101	Not Sig	15397	NA	2	3	0	96972.4	0.210598091	34769.6	0.02962578
ANGEL2	NW_005081548.1	3501733	3517130	Adult Male	AMV	Adult Male Brain	180.379499	0.04745712	0.093588861	0.256301976	0.612672206	0.75041584	Not Sig	745.3223984	0.050420934	0.071580154	0.496102347	0.481217742	0.92036806	Not Sig	15397	NA	2	3	0	96972.4	0.210598091	34769.6	0.02962578
ANGEL2	NW_005081548.1	3501733	3517130	Nestling Female	Hyp	Nestling Female Brain	404.6582774	0.54663985	0.079573645	46.98928893	7.14e-12	7.55e-11	Sig	1542.264663	0.320891473	0.061456951	27.22263408	1.81e-07	0.000144745	Sig	15397	NA	2	3	0	96972.4	0.210598091	34769.6	0.02962578
ANGEL2	NW_005081548.1	3501733	3517130	Nestling Female	AMV	Nestling Female Brain	510.2514997	0.14717426	0.098244498	2.234438599	0.134965637	0.24463999	Not Sig	1970.381558	0.075011391	0.115893638	0.41837151	0.51775075	0.996634902	Not Sig	15397	NA	2	3	0	96972.4	0.210598091	34769.6	0.02962578
ANGEL2	NW_005081548.1	3501733	3517130	Nestling Male	Hyp	Nestling Male Brain	404.1081095	0.547956425	0.118202145	21.28481189	3.96e-06	3.2e-05	Sig	1674.188289	0.243987922	0.088497949	7.644528416	0.005694478	0.372394637	Not Sig	15397	NA	2	3	0	96972.4	0.210598091	34769.6	0.02962578
ANGEL2	NW_005081548.1	3501733	3517130	Nestling Male	AMV	Nestling Male Brain	543.8619572	0.078151974	0.111794037	0.48629598	0.485584252	0.663909776	Not Sig	2004.879992	0.166136037	0.092429239	3.249790543	0.071432586	0.59215262	Not Sig	15397	NA	2	3	0	96972.4	0.210598091	34769.6	0.02962578
ANGPT2	NW_005081876.1	10246	53733	Adult Female	Hyp	Adult Female Brain	448.5017397	0.119308959	0.127556278	0.868709248	0.351312891	0.541202367	Not Sig	1552.582441	0.048766366	0.154877396	0.099041518	0.752982896	0.998912819	Not Sig	43487	NA	2	3	16	NA	-1	NA	-1
ANGPT2	NW_005081876.1	10246	53733	Adult Female	AMV	Adult Female Brain	2493.850749	0.065247399	0.073537832	0.783290956	0.376136534	0.54079068	Not Sig	8400.658153	0.267898389	0.123286554	4.68933402	0.030350409	0.542923678	Not Sig	43487	NA	2	3	16	NA	-1	NA	-1
ANGPT2	NW_005081876.1	10246	53733	Adult Male	Heart	Adult Male Horton et al	85.55959665	-0.258990791	0.089195417	8.386617144	0.003779938	0.008340934	Sig	NA	NA	NA	NA	NA	NA	NA	43487	NA	2	3	16	NA	-1	NA	-1
ANGPT2	NW_005081876.1	10246	53733	Adult Male	Liver	Adult Male Horton et al	37.43393768	-0.015376275	0.347209864	0.001727934	0.966842745	0.983131311	Not Sig	NA	NA	NA	NA	NA	NA	NA	43487	NA	2	3	16	NA	-1	NA	-1
ANGPT2	NW_005081876.1	10246	53733	Adult Male	Hyp	Adult Male Brain	203.2224564	-0.039719041	0.08104852	0.239808878	0.624344187	0.748086105	Not Sig	835.296264	-0.162371959	0.108098519	2.260539908	0.132707787	0.877067183	Not Sig	43487	NA	2	3	16	NA	-1	NA	-1
ANGPT2	NW_005081876.1	10246	53733	Adult Male	AMV	Adult Male Brain	1175.391074	0.324676093	0.049131233	43.53917301	4.16e-11	3.27e-10	Sig	4394.836115	0.134126821	0.098296482	1.858457168	0.172802971	0.77341968	Not Sig	43487	NA	2	3	16	NA	-1	NA	-1
ANGPT2	NW_005081876.1	10246	53733	Nestling Female	Hyp	Nestling Female Brain	547.0130088	0.153518372	0.085790468	3.180434808	0.074524896	0.13440403	Not Sig	1846.290845	0.004783528	0.100834377	0.002273936	0.961966646	0.996896415	Not Sig	43487	NA	2	3	16	NA	-1	NA	-1
ANGPT2	NW_005081876.1	10246	53733	Nestling Female	AMV	Nestling Female Brain	1841.399889	0.220312518	0.074381581	8.726967867	0.003135375	0.009715907	Sig	6110.757341	0.040803332	0.218164178	0.034955833	0.851688238	0.996634902	Not Sig	43487	NA	2	3	16	NA	-1	NA	-1
ANGPT2	NW_005081876.1	10246	53733	Nestling Male	Hyp	Nestling Male Brain	561.1321533	0.052257834	0.113355305	0.21059996	0.646297567	0.809167515	Not Sig	2040.996634	0.02118285	0.117887888	0.032312212	0.857344143	1	Not Sig	43487	NA	2	3	16	NA	-1	NA	-1
ANGPT2	NW_005081876.1	10246	53733	Nestling Male	AMV	Nestling Male Brain	1922.289212	-0.003785105	0.114379491	0.001073334	0.973864559	0.991263482	Not Sig	5772.331591	0.009793821	0.221651908	0.00195308	0.964750028	0.998355531	Not Sig	43487	NA	2	3	16	NA	-1	NA	-1
ANKEF1	NW_005081577.1	5383177	5398731	Adult Female	Hyp	Adult Female Brain	NA	NA	NA	NA	NA	NA	NA	NA	NA	NA	NA	NA	NA	NA	15554	NA	1	3	0	70181.6	0.701539061	9959.95	0.014675052
ANKEF1	NW_005081577.1	5383177	5398731	Adult Female	AMV	Adult Female Brain	NA	NA	NA	NA	NA	NA	NA	NA	NA	NA	NA	NA	NA	NA	15554	NA	1	3	0	70181.6	0.701539061	9959.95	0.014675052
ANKEF1	NW_005081577.1	5383177	5398731	Adult Male	Heart	Adult Male Horton et al	0.069698182	-0.004327266	2.958317559	3.61e-06	0.998483242	100	Not Sig	NA	NA	NA	NA	NA	NA	NA	15554	NA	1	3	0	70181.6	0.701539061	9959.95	0.014675052
ANKEF1	NW_005081577.1	5383177	5398731	Adult Male	Liver	Adult Male Horton et al	0.205667758	0.167641058	2.956727627	0.005727908	0.939671346	100	Not Sig	NA	NA	NA	NA	NA	NA	NA	15554	NA	1	3	0	70181.6	0.701539061	9959.95	0.014675052
ANKEF1	NW_005081577.1	5383177	5398731	Adult Male	Hyp	Adult Male Brain	NA	NA	NA	NA	NA	NA	NA	NA	NA	NA	NA	NA	NA	NA	15554	NA	1	3	0	70181.6	0.701539061	9959.95	0.014675052
ANKEF1	NW_005081577.1	5383177	5398731	Adult Male	AMV	Adult Male Brain	NA	NA	NA	NA	NA	NA	NA	NA	NA	NA	NA	NA	NA	NA	15554	NA	1	3	0	70181.6	0.701539061	9959.95	0.014675052
ANKEF1	NW_005081577.1	5383177	5398731	Nestling Female	Hyp	Nestling Female Brain	NA	NA	NA	NA	NA	NA	NA	NA	NA	NA	NA	NA	NA	NA	15554	NA	1	3	0	70181.6	0.701539061	9959.95	0.014675052
ANKEF1	NW_005081577.1	5383177	5398731	Nestling Female	AMV	Nestling Female Brain	NA	NA	NA	NA	NA	NA	NA	NA	NA	NA	NA	NA	NA	NA	15554	NA	1	3	0	70181.6	0.701539061	9959.95	0.014675052
ANKEF1	NW_005081577.1	5383177	5398731	Nestling Male	Hyp	Nestling Male Brain	NA	NA	NA	NA	NA	NA	NA	NA	NA	NA	NA	NA	NA	NA	15554	NA	1	3	0	70181.6	0.701539061	9959.95	0.014675052
ANKEF1	NW_005081577.1	5383177	5398731	Nestling Male	AMV	Nestling Male Brain	NA	NA	NA	NA	NA	NA	NA	NA	NA	NA	NA	NA	NA	NA	15554	NA	1	3	0	70181.6	0.701539061	9959.95	0.014675052
ANKRD6	NW_005081553.1	4450554	4538690	Adult Female	Hyp	Adult Female Brain	1194.541297	0.148277969	0.067870243	4.769697109	0.028964921	0.073354535	Not Sig	6497.391532	0.044732637	0.125732829	0.12645919	0.722131898	0.998912819	Not Sig	88136	NA	3	4	0	113331.8	0.098811611	2661.222	0.790496157
ANKRD6	NW_005081553.1	4450554	4538690	Adult Female	AMV	Adult Female Brain	291.3624332	0.235376967	0.148388464	2.50172569	0.113721625	0.223694185	Not Sig	1749.562707	0.039520147	0.144008325	0.075285278	0.78379136	0.992913561	Not Sig	88136	NA	3	4	0	113331.8	0.098811611	2661.222	0.790496157
ANKRD6	NW_005081553.1	4450554	4538690	Adult Male	Heart	Adult Male Horton et al	75.22598395	0.713317938	0.157768042	19.51595336	9.98e-06	3.27e-05	Sig	NA	NA	NA	NA	NA	NA	NA	88136	NA	3	4	0	113331.8	0.098811611	2661.222	0.790496157
ANKRD6	NW_005081553.1	4450554	4538690	Adult Male	Liver	Adult Male Horton et al	16.48552297	0.487941396	0.275565336	2.863349916	0.0906186	0.158864558	Not Sig	NA	NA	NA	NA	NA	NA	NA	88136	NA	3	4	0	113331.8	0.098811611	2661.222	0.790496157
ANKRD6	NW_005081553.1	4450554	4538690	Adult Male	Hyp	Adult Male Brain	463.2653628	0.184669333	0.075388411	5.965840437	0.014585647	0.03335674	Sig	3134.858869	0.089554855	0.067337522	1.766769762	0.183782352	0.914406222	Not Sig	88136	NA	3	4	0	113331.8	0.098811611	2661.222	0.790496157
ANKRD6	NW_005081553.1	4450554	4538690	Adult Male	AMV	Adult Male Brain	118.3245257	-0.12797525	0.169373943	0.553387452	0.456936877	0.60808648	Not Sig	773.415996	0.077528757	0.18870005	0.1687054	0.681264932	0.958590555	Not Sig	88136	NA	3	4	0	113331.8	0.098811611	2661.222	0.790496157
ANKRD6	NW_005081553.1	4450554	4538690	Nestling Female	Hyp	Nestling Female Brain	1186.719694	0.230987745	0.049942179	21.35575199	3.81e-06	1.94e-05	Sig	6047.374562	0.282930313	0.09750733	8.406734243	0.003738336	0.181559804	Not Sig	88136	NA	3	4	0	113331.8	0.098811611	2661.222	0.790496157
ANKRD6	NW_005081553.1	4450554	4538690	Nestling Female	AMV	Nestling Female Brain	385.4145682	0.554046337	0.171191287	10.18300777	0.001417408	0.004906412	Sig	1706.989997	0.529858608	0.254814747	4.267106811	0.038857037	0.996634902	Not Sig	88136	NA	3	4	0	113331.8	0.098811611	2661.222	0.790496157
ANKRD6	NW_005081553.1	4450554	4538690	Nestling Male	Hyp	Nestling Male Brain	1092.937978	0.105301079	0.077008205	1.863432201	0.172229197	0.324004324	Not Sig	6624.473797	-0.063746141	0.111180548	0.328136289	0.566758575	0.996116837	Not Sig	88136	NA	3	4	0	113331.8	0.098811611	2661.222	0.790496157
ANKRD6	NW_005081553.1	4450554	4538690	Nestling Male	AMV	Nestling Male Brain	460.0691675	0.243743583	0.146648101	2.724466935	0.09882111	0.19976533	Not Sig	2164.553854	0.462845355	0.370932463	1.580020479	0.208757744	0.726464629	Not Sig	88136	NA	3	4	0	113331.8	0.098811611	2661.222	0.790496157
ANKRD66	NW_005081635.1	48137	55989	Adult Female	Hyp	Adult Female Brain	NA	NA	NA	NA	NA	NA	NA	1083.524809	-0.007177023	0.116115355	0.003821002	0.950710754	0.998912819	Not Sig	NA	NA	NA	NA	0	NA	-1	NA	-1
ANKRD66	NW_005081635.1	48137	55989	Adult Female	AMV	Adult Female Brain	NA	NA	NA	NA	NA	NA	NA	60.37760227	-0.922937136	0.551059964	2.816139929	0.093320582	0.742662747	Not Sig	NA	NA	NA	NA	0	NA	-1	NA	-1
ANKRD66	NW_005081635.1	48137	55989	Adult Male	Heart	Adult Male Horton et al	NA	NA	NA	NA	NA	NA	NA	NA	NA	NA	NA	NA	NA	NA	NA	NA	NA	NA	0	NA	-1	NA	-1
ANKRD66	NW_005081635.1	48137	55989	Adult Male	Liver	Adult Male Horton et al	NA	NA	NA	NA	NA	NA	NA	NA	NA	NA	NA	NA	NA	NA	NA	NA	NA	NA	0	NA	-1	NA	-1
ANKRD66	NW_005081635.1	48137	55989	Adult Male	Hyp	Adult Male Brain	NA	NA	NA	NA	NA	NA	NA	733.1426943	-0.102116036	0.067682349	2.278055459	0.131216299	0.877067183	Not Sig	NA	NA	NA	NA	0	NA	-1	NA	-1
ANKRD66	NW_005081635.1	48137	55989	Adult Male	AMV	Adult Male Brain	NA	NA	NA	NA	NA	NA	NA	329.5891113	-0.054805844	0.103344712	0.281693774	0.5955932	0.944597457	Not Sig	NA	NA	NA	NA	0	NA	-1	NA	-1
ANKRD66	NW_005081635.1	48137	55989	Nestling Female	Hyp	Nestling Female Brain	NA	NA	NA	NA	NA	NA	NA	1459.566173	0.207038559	0.122382351	2.858783863	0.090876181	0.709855863	Not Sig	NA	NA	NA	NA	0	NA	-1	NA	-1
ANKRD66	NW_005081635.1	48137	55989	Nestling Female	AMV	Nestling Female Brain	NA	NA	NA	NA	NA	NA	NA	71.84714119	0.175157012	0.557015096	0.099014445	0.753015559	0.996634902	Not Sig	NA	NA	NA	NA	0	NA	-1	NA	-1
ANKRD66	NW_005081635.1	48137	55989	Nestling Male	Hyp	Nestling Male Brain	NA	NA	NA	NA	NA	NA	NA	1502.556291	-0.445432156	0.162233257	7.417856462	0.006457971	0.396984367	Not Sig	NA	NA	NA	NA	0	NA	-1	NA	-1
ANKRD66	NW_005081635.1	48137	55989	Nestling Male	AMV	Nestling Male Brain	NA	NA	NA	NA	NA	NA	NA	53.65820836	-0.804265449	0.617628111	1.628031009	0.201975604	0.722338805	Not Sig	NA	NA	NA	NA	0	NA	-1	NA	-1
APLF	NW_005081615.1	3400348	3421032	Adult Female	Hyp	Adult Female Brain	93.2975012	-0.96131967	0.254152118	13.96349933	0.000186394	0.000823111	Sig	551.3298187	-0.510791973	0.234550125	4.767045625	0.029009566	0.688566656	Not Sig	20684	NA	2	1	16	NA	-1	NA	-1
APLF	NW_005081615.1	3400348	3421032	Adult Female	AMV	Adult Female Brain	71.80539166	-2.184247839	0.33994442	37.76575615	7.98e-10	8.32e-09	Sig	404.8380724	-0.68889935	0.253239902	7.441800861	0.006372609	0.261467775	Not Sig	20684	NA	2	1	16	NA	-1	NA	-1
APLF	NW_005081615.1	3400348	3421032	Adult Male	Heart	Adult Male Horton et al	24.63993471	-5.283292241	0.73904434	31.43026024	2.07e-08	9.36e-08	Sig	NA	NA	NA	NA	NA	NA	NA	20684	NA	2	1	16	NA	-1	NA	-1
APLF	NW_005081615.1	3400348	3421032	Adult Male	Liver	Adult Male Horton et al	40.6687658	-4.134443472	0.539703204	39.45580906	3.36e-10	2.4e-09	Sig	NA	NA	NA	NA	NA	NA	NA	20684	NA	2	1	16	NA	-1	NA	-1
APLF	NW_005081615.1	3400348	3421032	Adult Male	Hyp	Adult Male Brain	52.24007626	-1.412305418	0.162699451	76.23376508	2.52e-18	3.79e-17	Sig	296.7084965	-0.334919749	0.108738307	9.496466313	0.00205868	0.123251101	Not Sig	20684	NA	2	1	16	NA	-1	NA	-1
APLF	NW_005081615.1	3400348	3421032	Adult Male	AMV	Adult Male Brain	34.24526502	-2.011067606	0.248968807	64.52939118	9.51e-16	1.16e-14	Sig	202.2250274	-0.563125475	0.135327645	17.33469007	3.13e-05	0.007374868	Sig	20684	NA	2	1	16	NA	-1	NA	-1
APLF	NW_005081615.1	3400348	3421032	Nestling Female	Hyp	Nestling Female Brain	103.0011049	-1.195659443	0.206515944	31.98585964	1.55e-08	1.09e-07	Sig	536.377218	-0.37247881	0.18619416	3.992405274	0.045705775	0.568626508	Not Sig	20684	NA	2	1	16	NA	-1	NA	-1
APLF	NW_005081615.1	3400348	3421032	Nestling Female	AMV	Nestling Female Brain	81.35423259	-1.087945062	0.270438621	15.38696122	8.76e-05	0.000408362	Sig	438.0138417	-0.197342814	0.245371936	0.648320481	0.420713792	0.996634902	Not Sig	20684	NA	2	1	16	NA	-1	NA	-1
APLF	NW_005081615.1	3400348	3421032	Nestling Male	Hyp	Nestling Male Brain	91.31398554	-1.096136468	0.260970707	16.87866281	3.98e-05	0.000244679	Sig	510.8983167	-0.819109265	0.176623961	20.82361952	5.04e-06	0.003410437	Sig	20684	NA	2	1	16	NA	-1	NA	-1
APLF	NW_005081615.1	3400348	3421032	Nestling Male	AMV	Nestling Male Brain	102.9065716	-1.912939349	0.437289856	16.24938125	5.55e-05	0.000332203	Sig	472.1760405	-0.378239476	0.201400539	3.466714937	0.062615547	0.577231992	Not Sig	20684	NA	2	1	16	NA	-1	NA	-1
APMAP	NW_005081602.1	3550574	3561021	Adult Female	Hyp	Adult Female Brain	NA	NA	NA	NA	NA	NA	NA	5192.513276	0.713661285	0.116853727	36.41385085	1.6e-09	3.69e-06	Sig	10447	NA	3	3	22	NA	-1	NA	-1
APMAP	NW_005081602.1	3550574	3561021	Adult Female	AMV	Adult Female Brain	NA	NA	NA	NA	NA	NA	NA	2051.474823	0.678466025	0.147480977	20.69836108	5.38e-06	0.001889114	Sig	10447	NA	3	3	22	NA	-1	NA	-1
APMAP	NW_005081602.1	3550574	3561021	Adult Male	Heart	Adult Male Horton et al	NA	NA	NA	NA	NA	NA	NA	NA	NA	NA	NA	NA	NA	NA	10447	NA	3	3	22	NA	-1	NA	-1
APMAP	NW_005081602.1	3550574	3561021	Adult Male	Liver	Adult Male Horton et al	NA	NA	NA	NA	NA	NA	NA	NA	NA	NA	NA	NA	NA	NA	10447	NA	3	3	22	NA	-1	NA	-1
APMAP	NW_005081602.1	3550574	3561021	Adult Male	Hyp	Adult Male Brain	NA	NA	NA	NA	NA	NA	NA	3057.802208	0.372982786	0.100613754	13.64640166	0.000220664	0.022082487	Sig	10447	NA	3	3	22	NA	-1	NA	-1
APMAP	NW_005081602.1	3550574	3561021	Adult Male	AMV	Adult Male Brain	NA	NA	NA	NA	NA	NA	NA	1084.080586	0.438215137	0.103356483	17.82952691	2.42e-05	0.006031218	Sig	10447	NA	3	3	22	NA	-1	NA	-1
APMAP	NW_005081602.1	3550574	3561021	Nestling Female	Hyp	Nestling Female Brain	NA	NA	NA	NA	NA	NA	NA	4705.400426	0.378821244	0.152788045	6.129742517	0.013292623	0.342492665	Not Sig	10447	NA	3	3	22	NA	-1	NA	-1
APMAP	NW_005081602.1	3550574	3561021	Nestling Female	AMV	Nestling Female Brain	NA	NA	NA	NA	NA	NA	NA	2787.432545	0.126978234	0.12474197	1.033776244	0.309273384	0.996634902	Not Sig	10447	NA	3	3	22	NA	-1	NA	-1
APMAP	NW_005081602.1	3550574	3561021	Nestling Male	Hyp	Nestling Male Brain	NA	NA	NA	NA	NA	NA	NA	4319.444303	0.241941297	0.165545705	2.148130967	0.142743565	0.964392563	Not Sig	10447	NA	3	3	22	NA	-1	NA	-1
APMAP	NW_005081602.1	3550574	3561021	Nestling Male	AMV	Nestling Male Brain	NA	NA	NA	NA	NA	NA	NA	3113.209982	0.454547366	0.163431155	7.848187992	0.005087167	0.409088549	Not Sig	10447	NA	3	3	22	NA	-1	NA	-1
APOB	NW_005081561.1	5667044	5702468	Adult Female	Hyp	Adult Female Brain	2.300515856	-0.406477488	2.243184992	0.030689478	0.860934957	0.925791277	Not Sig	6.47720216	1.031927672	1.741769518	0.337025319	0.561551318	0.998912819	Not Sig	35424	NA	23	32	18	56016.26667	0.88882395	10341.70333	0.449305555
APOB	NW_005081561.1	5667044	5702468	Adult Female	AMV	Adult Female Brain	0	NA	NA	NA	NA	100	Not Sig	3.155472262	-1.401333855	2.501498821	0.312437477	0.57618829	100	Not Sig	35424	NA	23	32	18	56016.26667	0.88882395	10341.70333	0.449305555
APOB	NW_005081561.1	5667044	5702468	Adult Male	Heart	Adult Male Horton et al	201.3022665	-0.326201374	0.090288836	12.91813758	0.000325413	0.000863444	Sig	NA	NA	NA	NA	NA	NA	NA	35424	NA	23	32	18	56016.26667	0.88882395	10341.70333	0.449305555
APOB	NW_005081561.1	5667044	5702468	Adult Male	Liver	Adult Male Horton et al	116603.6847	-0.348197666	0.072628792	22.65129543	1.94e-06	9.02e-06	Sig	NA	NA	NA	NA	NA	NA	NA	35424	NA	23	32	18	56016.26667	0.88882395	10341.70333	0.449305555
APOB	NW_005081561.1	5667044	5702468	Adult Male	Hyp	Adult Male Brain	0.559009493	-0.009886556	3.01353837	1.5e-05	0.99690717	0.999451971	Not Sig	2.319261312	0.428484226	1.836723426	0.054324957	0.815701499	100	Not Sig	35424	NA	23	32	18	56016.26667	0.88882395	10341.70333	0.449305555
APOB	NW_005081561.1	5667044	5702468	Adult Male	AMV	Adult Male Brain	0.494347491	0.284601436	3.014149146	0.013321374	0.90811361	0.941414109	Not Sig	0.706313612	2.915780903	2.934716018	1.446108756	0.229153363	100	Not Sig	35424	NA	23	32	18	56016.26667	0.88882395	10341.70333	0.449305555
APOB	NW_005081561.1	5667044	5702468	Nestling Female	Hyp	Nestling Female Brain	6.255091736	1.280741908	1.050491625	1.084904578	0.297602954	0.415922187	Not Sig	27.14027782	-0.894619232	0.718448013	1.525751869	0.216751135	0.872267271	Not Sig	35424	NA	23	32	18	56016.26667	0.88882395	10341.70333	0.449305555
APOB	NW_005081561.1	5667044	5702468	Nestling Female	AMV	Nestling Female Brain	4.155750144	0.993409766	1.70948461	0.291143462	0.589488703	0.731559721	Not Sig	18.63901183	0.275848706	1.010573639	0.074396518	0.785039823	0.996634902	Not Sig	35424	NA	23	32	18	56016.26667	0.88882395	10341.70333	0.449305555
APOB	NW_005081561.1	5667044	5702468	Nestling Male	Hyp	Nestling Male Brain	1.617544929	0.134892013	2.583937976	0.000584747	0.980707796	0.991755352	Not Sig	13.70669431	-0.933315383	0.8038721	1.301213162	0.253991745	0.995064234	Not Sig	35424	NA	23	32	18	56016.26667	0.88882395	10341.70333	0.449305555
APOB	NW_005081561.1	5667044	5702468	Nestling Male	AMV	Nestling Male Brain	6.313836693	1.436128482	1.376747875	0.799175813	0.371339902	0.553535892	Not Sig	27.19558953	-0.322117498	0.545945051	0.344892446	0.557018731	0.885449934	Not Sig	35424	NA	23	32	18	56016.26667	0.88882395	10341.70333	0.449305555
ARFGEF3	NW_005081611.1	3077584	3173617	Adult Female	Hyp	Adult Female Brain	10680.21946	0.011290339	0.033638134	0.112587041	0.737217833	0.869602629	Not Sig	38196.51693	0.085671787	0.111154728	0.592895891	0.441301476	0.998912819	Not Sig	96033	NA	5	6	11	68317.63333	0.739301253	17945.5	0.363652114
ARFGEF3	NW_005081611.1	3077584	3173617	Adult Female	AMV	Adult Female Brain	5478.605417	0.146756536	0.039082926	14.08873614	0.000174385	0.000728753	Sig	17676.69115	0.240357472	0.136684969	3.073212463	0.079592046	0.706957238	Not Sig	96033	NA	5	6	11	68317.63333	0.739301253	17945.5	0.363652114
ARFGEF3	NW_005081611.1	3077584	3173617	Adult Male	Heart	Adult Male Horton et al	298.4524545	-0.395249032	0.077482963	25.68467943	4.02e-07	1.57e-06	Sig	NA	NA	NA	NA	NA	NA	NA	96033	NA	5	6	11	68317.63333	0.739301253	17945.5	0.363652114
ARFGEF3	NW_005081611.1	3077584	3173617	Adult Male	Liver	Adult Male Horton et al	74.19807039	1.984676272	0.27140648	45.98932535	1.19e-11	9.57e-11	Sig	NA	NA	NA	NA	NA	NA	NA	96033	NA	5	6	11	68317.63333	0.739301253	17945.5	0.363652114
ARFGEF3	NW_005081611.1	3077584	3173617	Adult Male	Hyp	Adult Male Brain	4056.142097	0.021253947	0.022313118	0.907224162	0.340852005	0.480021832	Not Sig	15178.40834	0.154631635	0.04753183	10.55872025	0.001156412	0.086101646	Not Sig	96033	NA	5	6	11	68317.63333	0.739301253	17945.5	0.363652114
ARFGEF3	NW_005081611.1	3077584	3173617	Adult Male	AMV	Adult Male Brain	1683.719902	0.105678779	0.038466006	7.540118321	0.006034008	0.014542793	Sig	6316.794185	0.026917943	0.091090355	0.08729411	0.767645738	0.975306535	Not Sig	96033	NA	5	6	11	68317.63333	0.739301253	17945.5	0.363652114
ARFGEF3	NW_005081611.1	3077584	3173617	Nestling Female	Hyp	Nestling Female Brain	11837.81272	0.146227492	0.027010945	29.27458465	6.28e-08	4.1e-07	Sig	41387.69256	0.198893329	0.121630878	2.671862883	0.10213641	0.736047498	Not Sig	96033	NA	5	6	11	68317.63333	0.739301253	17945.5	0.363652114
ARFGEF3	NW_005081611.1	3077584	3173617	Nestling Female	AMV	Nestling Female Brain	5003.418696	0.347368524	0.044864508	59.74871097	1.08e-14	2.1e-13	Sig	15117.40932	0.435040177	0.192450894	5.057314751	0.024522205	0.996634902	Not Sig	96033	NA	5	6	11	68317.63333	0.739301253	17945.5	0.363652114
ARFGEF3	NW_005081611.1	3077584	3173617	Nestling Male	Hyp	Nestling Male Brain	11696.56489	0.101766477	0.026372489	14.88293782	0.000114393	0.000637916	Sig	46342.12211	-0.107470597	0.132870708	0.652049512	0.419380877	0.995064234	Not Sig	96033	NA	5	6	11	68317.63333	0.739301253	17945.5	0.363652114
ARFGEF3	NW_005081611.1	3077584	3173617	Nestling Male	AMV	Nestling Male Brain	4655.646344	0.322840627	0.052245457	38.06927067	6.83e-10	1.12e-08	Sig	17271.97971	-0.283171966	0.332569725	0.715618085	0.397585029	0.823294716	Not Sig	96033	NA	5	6	11	68317.63333	0.739301253	17945.5	0.363652114
ARHGAP18	NW_005081591.1	361148	463334	Adult Female	Hyp	Adult Female Brain	702.1010567	0.136599968	0.094992825	2.062439895	0.150968273	0.277876804	Not Sig	2209.993536	-0.114109458	0.190707502	0.358789335	0.549179378	0.998912819	Not Sig	102186	NA	2	5	13	65672.3	0.782940451	13724.83333	0.688756064
ARHGAP18	NW_005081591.1	361148	463334	Adult Female	Hyp	Adult Female Brain	702.1010567	0.136599968	0.094992825	2.062439895	0.150968273	0.277876804	Not Sig	2209.993536	-0.114109458	0.190707502	0.358789335	0.549179378	0.998912819	Not Sig	102186	NA	1	5	13	65672.3	0.782940451	13724.83333	0.688756064
ARHGAP18	NW_005081591.1	361148	463334	Adult Female	AMV	Adult Female Brain	330.9327042	0.206847629	0.13980939	2.17747369	0.140044176	0.265268862	Not Sig	1192.883949	-0.139033049	0.130541981	1.136932868	0.286301362	0.918274419	Not Sig	102186	NA	2	5	13	65672.3	0.782940451	13724.83333	0.688756064
ARHGAP18	NW_005081591.1	361148	463334	Adult Female	AMV	Adult Female Brain	330.9327042	0.206847629	0.13980939	2.17747369	0.140044176	0.265268862	Not Sig	1192.883949	-0.139033049	0.130541981	1.136932868	0.286301362	0.918274419	Not Sig	102186	NA	1	5	13	65672.3	0.782940451	13724.83333	0.688756064
ARHGAP18	NW_005081591.1	361148	463334	Adult Male	Heart	Adult Male Horton et al	82.24086244	0.877411132	0.126429276	47.01011393	7.06e-12	4.49e-11	Sig	NA	NA	NA	NA	NA	NA	NA	102186	NA	2	5	13	65672.3	0.782940451	13724.83333	0.688756064
ARHGAP18	NW_005081591.1	361148	463334	Adult Male	Heart	Adult Male Horton et al	82.24086244	0.877411132	0.126429276	47.01011393	7.06e-12	4.49e-11	Sig	NA	NA	NA	NA	NA	NA	NA	102186	NA	1	5	13	65672.3	0.782940451	13724.83333	0.688756064
ARHGAP18	NW_005081591.1	361148	463334	Adult Male	Liver	Adult Male Horton et al	51.18566915	0.873125886	0.224051396	14.01146613	0.000181699	0.00058826	Sig	NA	NA	NA	NA	NA	NA	NA	102186	NA	2	5	13	65672.3	0.782940451	13724.83333	0.688756064
ARHGAP18	NW_005081591.1	361148	463334	Adult Male	Liver	Adult Male Horton et al	51.18566915	0.873125886	0.224051396	14.01146613	0.000181699	0.00058826	Sig	NA	NA	NA	NA	NA	NA	NA	102186	NA	1	5	13	65672.3	0.782940451	13724.83333	0.688756064
ARHGAP18	NW_005081591.1	361148	463334	Adult Male	Hyp	Adult Male Brain	316.6886865	0.329720876	0.058881942	31.37893395	2.12e-08	1.32e-07	Sig	964.6210246	0.276308441	0.083571483	10.88697332	0.000968429	0.076746638	Not Sig	102186	NA	2	5	13	65672.3	0.782940451	13724.83333	0.688756064
ARHGAP18	NW_005081591.1	361148	463334	Adult Male	Hyp	Adult Male Brain	316.6886865	0.329720876	0.058881942	31.37893395	2.12e-08	1.32e-07	Sig	964.6210246	0.276308441	0.083571483	10.88697332	0.000968429	0.076746638	Not Sig	102186	NA	1	5	13	65672.3	0.782940451	13724.83333	0.688756064
ARHGAP18	NW_005081591.1	361148	463334	Adult Male	AMV	Adult Male Brain	177.5487657	0.12301082	0.125316783	0.949736188	0.329786457	0.467420914	Not Sig	568.6145351	0.09986714	0.082619528	1.460756246	0.226809832	0.812436911	Not Sig	102186	NA	2	5	13	65672.3	0.782940451	13724.83333	0.688756064
ARHGAP18	NW_005081591.1	361148	463334	Adult Male	AMV	Adult Male Brain	177.5487657	0.12301082	0.125316783	0.949736188	0.329786457	0.467420914	Not Sig	568.6145351	0.09986714	0.082619528	1.460756246	0.226809832	0.812436911	Not Sig	102186	NA	1	5	13	65672.3	0.782940451	13724.83333	0.688756064
ARHGAP18	NW_005081591.1	361148	463334	Nestling Female	Hyp	Nestling Female Brain	608.6208677	0.375835184	0.057612013	42.51844643	7e-11	6.48e-10	Sig	1798.820193	0.07097121	0.141741679	0.250687424	0.616591457	0.98605262	Not Sig	102186	NA	2	5	13	65672.3	0.782940451	13724.83333	0.688756064
ARHGAP18	NW_005081591.1	361148	463334	Nestling Female	Hyp	Nestling Female Brain	608.6208677	0.375835184	0.057612013	42.51844643	7e-11	6.48e-10	Sig	1798.820193	0.07097121	0.141741679	0.250687424	0.616591457	0.98605262	Not Sig	102186	NA	1	5	13	65672.3	0.782940451	13724.83333	0.688756064
ARHGAP18	NW_005081591.1	361148	463334	Nestling Female	AMV	Nestling Female Brain	381.7808552	-0.011696083	0.129874446	0.008041424	0.928546287	0.95721654	Not Sig	1080.522347	0.062129355	0.180384507	0.118644972	0.730508798	0.996634902	Not Sig	102186	NA	2	5	13	65672.3	0.782940451	13724.83333	0.688756064
ARHGAP18	NW_005081591.1	361148	463334	Nestling Female	AMV	Nestling Female Brain	381.7808552	-0.011696083	0.129874446	0.008041424	0.928546287	0.95721654	Not Sig	1080.522347	0.062129355	0.180384507	0.118644972	0.730508798	0.996634902	Not Sig	102186	NA	1	5	13	65672.3	0.782940451	13724.83333	0.688756064
ARHGAP18	NW_005081591.1	361148	463334	Nestling Male	Hyp	Nestling Male Brain	680.0500266	0.214120318	0.083830742	6.509262788	0.010731399	0.032088647	Sig	2055.234717	0.114678415	0.159952294	0.51557843	0.472733916	0.995064234	Not Sig	102186	NA	2	5	13	65672.3	0.782940451	13724.83333	0.688756064
ARHGAP18	NW_005081591.1	361148	463334	Nestling Male	Hyp	Nestling Male Brain	680.0500266	0.214120318	0.083830742	6.509262788	0.010731399	0.032088647	Sig	2055.234717	0.114678415	0.159952294	0.51557843	0.472733916	0.995064234	Not Sig	102186	NA	1	5	13	65672.3	0.782940451	13724.83333	0.688756064
ARHGAP18	NW_005081591.1	361148	463334	Nestling Male	AMV	Nestling Male Brain	483.9970875	0.101335646	0.141374599	0.507463794	0.476238826	0.656334467	Not Sig	1283.830219	0.088505271	0.160647825	0.304587443	0.581020697	0.892023234	Not Sig	102186	NA	2	5	13	65672.3	0.782940451	13724.83333	0.688756064
ARHGAP18	NW_005081591.1	361148	463334	Nestling Male	AMV	Nestling Male Brain	483.9970875	0.101335646	0.141374599	0.507463794	0.476238826	0.656334467	Not Sig	1283.830219	0.088505271	0.160647825	0.304587443	0.581020697	0.892023234	Not Sig	102186	NA	1	5	13	65672.3	0.782940451	13724.83333	0.688756064
ARHGEF10	NW_005081609.1	1545281	1669810	Adult Female	Hyp	Adult Female Brain	NA	NA	NA	NA	NA	NA	NA	NA	NA	NA	NA	NA	NA	NA	124529	NA	3	3	19	NA	-1	NA	-1
ARHGEF10	NW_005081609.1	1545281	1669810	Adult Female	Hyp	Adult Female Brain	NA	NA	NA	NA	NA	NA	NA	NA	NA	NA	NA	NA	NA	NA	124529	NA	3	1	19	NA	-1	NA	-1
ARHGEF10	NW_005081609.1	1545281	1669810	Adult Female	AMV	Adult Female Brain	NA	NA	NA	NA	NA	NA	NA	NA	NA	NA	NA	NA	NA	NA	124529	NA	3	3	19	NA	-1	NA	-1
ARHGEF10	NW_005081609.1	1545281	1669810	Adult Female	AMV	Adult Female Brain	NA	NA	NA	NA	NA	NA	NA	NA	NA	NA	NA	NA	NA	NA	124529	NA	3	1	19	NA	-1	NA	-1
ARHGEF10	NW_005081609.1	1545281	1669810	Adult Male	Heart	Adult Male Horton et al	NA	NA	NA	NA	NA	NA	NA	NA	NA	NA	NA	NA	NA	NA	124529	NA	3	3	19	NA	-1	NA	-1
ARHGEF10	NW_005081609.1	1545281	1669810	Adult Male	Heart	Adult Male Horton et al	NA	NA	NA	NA	NA	NA	NA	NA	NA	NA	NA	NA	NA	NA	124529	NA	3	1	19	NA	-1	NA	-1
ARHGEF10	NW_005081609.1	1545281	1669810	Adult Male	Liver	Adult Male Horton et al	NA	NA	NA	NA	NA	NA	NA	NA	NA	NA	NA	NA	NA	NA	124529	NA	3	3	19	NA	-1	NA	-1
ARHGEF10	NW_005081609.1	1545281	1669810	Adult Male	Liver	Adult Male Horton et al	NA	NA	NA	NA	NA	NA	NA	NA	NA	NA	NA	NA	NA	NA	124529	NA	3	1	19	NA	-1	NA	-1
ARHGEF10	NW_005081609.1	1545281	1669810	Adult Male	Hyp	Adult Male Brain	NA	NA	NA	NA	NA	NA	NA	NA	NA	NA	NA	NA	NA	NA	124529	NA	3	3	19	NA	-1	NA	-1
ARHGEF10	NW_005081609.1	1545281	1669810	Adult Male	Hyp	Adult Male Brain	NA	NA	NA	NA	NA	NA	NA	NA	NA	NA	NA	NA	NA	NA	124529	NA	3	1	19	NA	-1	NA	-1
ARHGEF10	NW_005081609.1	1545281	1669810	Adult Male	AMV	Adult Male Brain	NA	NA	NA	NA	NA	NA	NA	NA	NA	NA	NA	NA	NA	NA	124529	NA	3	3	19	NA	-1	NA	-1
ARHGEF10	NW_005081609.1	1545281	1669810	Adult Male	AMV	Adult Male Brain	NA	NA	NA	NA	NA	NA	NA	NA	NA	NA	NA	NA	NA	NA	124529	NA	3	1	19	NA	-1	NA	-1
ARHGEF10	NW_005081609.1	1545281	1669810	Nestling Female	Hyp	Nestling Female Brain	NA	NA	NA	NA	NA	NA	NA	NA	NA	NA	NA	NA	NA	NA	124529	NA	3	3	19	NA	-1	NA	-1
ARHGEF10	NW_005081609.1	1545281	1669810	Nestling Female	Hyp	Nestling Female Brain	NA	NA	NA	NA	NA	NA	NA	NA	NA	NA	NA	NA	NA	NA	124529	NA	3	1	19	NA	-1	NA	-1
ARHGEF10	NW_005081609.1	1545281	1669810	Nestling Female	AMV	Nestling Female Brain	NA	NA	NA	NA	NA	NA	NA	NA	NA	NA	NA	NA	NA	NA	124529	NA	3	3	19	NA	-1	NA	-1
ARHGEF10	NW_005081609.1	1545281	1669810	Nestling Female	AMV	Nestling Female Brain	NA	NA	NA	NA	NA	NA	NA	NA	NA	NA	NA	NA	NA	NA	124529	NA	3	1	19	NA	-1	NA	-1
ARHGEF10	NW_005081609.1	1545281	1669810	Nestling Male	Hyp	Nestling Male Brain	NA	NA	NA	NA	NA	NA	NA	NA	NA	NA	NA	NA	NA	NA	124529	NA	3	3	19	NA	-1	NA	-1
ARHGEF10	NW_005081609.1	1545281	1669810	Nestling Male	Hyp	Nestling Male Brain	NA	NA	NA	NA	NA	NA	NA	NA	NA	NA	NA	NA	NA	NA	124529	NA	3	1	19	NA	-1	NA	-1
ARHGEF10	NW_005081609.1	1545281	1669810	Nestling Male	AMV	Nestling Male Brain	NA	NA	NA	NA	NA	NA	NA	NA	NA	NA	NA	NA	NA	NA	124529	NA	3	3	19	NA	-1	NA	-1
ARHGEF10	NW_005081609.1	1545281	1669810	Nestling Male	AMV	Nestling Male Brain	NA	NA	NA	NA	NA	NA	NA	NA	NA	NA	NA	NA	NA	NA	124529	NA	3	1	19	NA	-1	NA	-1
ARHGEF33	NW_005081615.1	134997	164243	Adult Female	Hyp	Adult Female Brain	0.386419989	-0.63283297	3.08876451	0.060905236	0.805070856	100	Not Sig	3.578314622	-1.179430262	1.716751901	0.470768536	0.492633818	100	Not Sig	29246	NA	NA	4	11	NA	-1	NA	-1
ARHGEF33	NW_005081615.1	134997	164243	Adult Female	AMV	Adult Female Brain	0	NA	NA	NA	NA	100	Not Sig	5.817467516	-3.947344502	1.773487854	4.374749166	0.036475198	0.572222554	Not Sig	29246	NA	NA	4	11	NA	-1	NA	-1
ARHGEF33	NW_005081615.1	134997	164243	Adult Male	Heart	Adult Male Horton et al	23.10856781	-0.29898593	0.170191353	3.026719368	0.081903465	0.132920258	Not Sig	NA	NA	NA	NA	NA	NA	NA	29246	NA	NA	4	11	NA	-1	NA	-1
ARHGEF33	NW_005081615.1	134997	164243	Adult Male	Liver	Adult Male Horton et al	2.635322792	-0.464416448	2.897188312	0.023718494	0.877603351	0.9281287	Not Sig	NA	NA	NA	NA	NA	NA	NA	29246	NA	NA	4	11	NA	-1	NA	-1
ARHGEF33	NW_005081615.1	134997	164243	Adult Male	Hyp	Adult Male Brain	0.152329058	0.382382338	3.030361666	0.025473915	0.873191848	100	Not Sig	0.144311739	0.894626757	3.037628191	0.046694407	0.828918463	100	Not Sig	29246	NA	NA	4	11	NA	-1	NA	-1
ARHGEF33	NW_005081615.1	134997	164243	Adult Male	AMV	Adult Male Brain	3.148687423	0.102803421	2.007137552	0.003918268	0.950088157	0.973351823	Not Sig	2.763724435	1.698457291	2.1899856	0.56566218	0.451987818	0.911232269	Not Sig	29246	NA	NA	4	11	NA	-1	NA	-1
ARHGEF33	NW_005081615.1	134997	164243	Nestling Female	Hyp	Nestling Female Brain	0.253897665	-0.321059591	3.04272247	0.023327562	0.878608338	100	Not Sig	5.276055633	0.169439846	1.369921031	0.015306176	0.901538455	0.996896415	Not Sig	29246	NA	NA	4	11	NA	-1	NA	-1
ARHGEF33	NW_005081615.1	134997	164243	Nestling Female	AMV	Nestling Female Brain	5.094581956	3.067077199	1.703174843	2.866782607	0.090425476	0.173637045	Not Sig	20.82364612	-0.091558214	1.202172937	0.005841029	0.939079686	0.996634902	Not Sig	29246	NA	NA	4	11	NA	-1	NA	-1
ARHGEF33	NW_005081615.1	134997	164243	Nestling Male	Hyp	Nestling Male Brain	5.580501279	2.988051017	3.003277725	0.907008613	0.34090937	0.547157035	Not Sig	11.83504575	1.530202029	0.922936666	2.749780986	0.097267751	0.899156401	Not Sig	29246	NA	NA	4	11	NA	-1	NA	-1
ARHGEF33	NW_005081615.1	134997	164243	Nestling Male	AMV	Nestling Male Brain	3.347283846	3.999676113	2.388308543	1.853755781	0.173347206	0.311483261	Not Sig	8.243827652	1.2448712	1.618052469	0.604034484	0.437042815	0.837944193	Not Sig	29246	NA	NA	4	11	NA	-1	NA	-1
ARID1B	NW_005081596.1	3963850	4255992	Adult Female	Hyp	Adult Female Brain	1345.614656	-0.183526978	0.063556562	8.332451864	0.003894306	0.013145964	Sig	8128.048677	0.123297314	0.041823034	8.668988251	0.003236708	0.282550396	Not Sig	292142	NA	1	3	10	67685.3	0.720098708	9590.818667	0.768892715
ARID1B	NW_005081596.1	3963850	4255992	Adult Female	AMV	Adult Female Brain	1050.034112	-0.199672401	0.0788619	6.398800748	0.011419748	0.031889064	Sig	6635.928766	0.05035218	0.124058536	0.164551417	0.685000243	0.992913561	Not Sig	292142	NA	1	3	10	67685.3	0.720098708	9590.818667	0.768892715
ARID1B	NW_005081596.1	3963850	4255992	Adult Male	Heart	Adult Male Horton et al	229.0191331	0.017213373	0.056542388	0.092405148	0.76114149	0.837022718	Not Sig	NA	NA	NA	NA	NA	NA	NA	292142	NA	1	3	10	67685.3	0.720098708	9590.818667	0.768892715
ARID1B	NW_005081596.1	3963850	4255992	Adult Male	Liver	Adult Male Horton et al	181.3129608	-0.149674469	0.056550247	6.99277825	0.008183923	0.019297877	Sig	NA	NA	NA	NA	NA	NA	NA	292142	NA	1	3	10	67685.3	0.720098708	9590.818667	0.768892715
ARID1B	NW_005081596.1	3963850	4255992	Adult Male	Hyp	Adult Male Brain	421.3961785	-0.175051862	0.059211206	8.729360032	0.003131264	0.008489922	Sig	2941.348227	-0.093033716	0.050078299	3.45393191	0.063101492	0.744810418	Not Sig	292142	NA	1	3	10	67685.3	0.720098708	9590.818667	0.768892715
ARID1B	NW_005081596.1	3963850	4255992	Adult Male	AMV	Adult Male Brain	300.9189656	-0.270260847	0.064680933	17.45212095	2.95e-05	0.000108901	Sig	2264.132315	-0.234794521	0.057488078	16.70583627	4.36e-05	0.0090646	Sig	292142	NA	1	3	10	67685.3	0.720098708	9590.818667	0.768892715
ARID1B	NW_005081596.1	3963850	4255992	Nestling Female	Hyp	Nestling Female Brain	1359.623088	-0.00971881	0.049357749	0.038715791	0.844012782	0.888569802	Not Sig	8663.07931	0.052755952	0.070520242	0.559663671	0.454395786	0.974083977	Not Sig	292142	NA	1	3	10	67685.3	0.720098708	9590.818667	0.768892715
ARID1B	NW_005081596.1	3963850	4255992	Nestling Female	AMV	Nestling Female Brain	1319.030359	-0.192535215	0.077075068	6.214359034	0.012671822	0.033098798	Sig	8340.333318	-0.269232906	0.219765711	1.504937749	0.219913169	0.996634902	Not Sig	292142	NA	1	3	10	67685.3	0.720098708	9590.818667	0.768892715
ARID1B	NW_005081596.1	3963850	4255992	Nestling Male	Hyp	Nestling Male Brain	1432.758359	-0.044451942	0.06209051	0.511817908	0.474352955	0.671590388	Not Sig	9610.336132	-0.100436319	0.078299538	1.6403788	0.200273503	0.986999268	Not Sig	292142	NA	1	3	10	67685.3	0.720098708	9590.818667	0.768892715
ARID1B	NW_005081596.1	3963850	4255992	Nestling Male	AMV	Nestling Male Brain	1399.097846	-0.234110939	0.06905029	11.4709521	0.000706925	0.003087202	Sig	9140.102246	-0.380592344	0.183281243	4.234703236	0.039605547	0.538875011	Not Sig	292142	NA	1	3	10	67685.3	0.720098708	9590.818667	0.768892715
ARID4B	NW_005081589.1	2910271	2998083	Adult Female	Hyp	Adult Female Brain	1414.198923	0.03009352	0.063987306	0.221063184	0.638231017	0.79854857	Not Sig	6259.830592	-0.062942619	0.072736248	0.749770348	0.38654895	0.998912819	Not Sig	87812	NA	1	12	10	119976.4	0.073446328	16963.2	0.176298727
ARID4B	NW_005081589.1	2910271	2998083	Adult Female	AMV	Adult Female Brain	1305.454551	0.025577159	0.072191586	0.125381007	0.723270082	0.832574564	Not Sig	6133.28795	-0.035909965	0.079808785	0.202610047	0.652622288	0.990552154	Not Sig	87812	NA	1	12	10	119976.4	0.073446328	16963.2	0.176298727
ARID4B	NW_005081589.1	2910271	2998083	Adult Male	Heart	Adult Male Horton et al	230.7652765	0.126967896	0.05091955	6.205807373	0.012733186	0.025239741	Sig	NA	NA	NA	NA	NA	NA	NA	87812	NA	1	12	10	119976.4	0.073446328	16963.2	0.176298727
ARID4B	NW_005081589.1	2910271	2998083	Adult Male	Liver	Adult Male Horton et al	212.4313277	-0.014292698	0.064665302	0.048620079	0.825482075	0.899962588	Not Sig	NA	NA	NA	NA	NA	NA	NA	87812	NA	1	12	10	119976.4	0.073446328	16963.2	0.176298727
ARID4B	NW_005081589.1	2910271	2998083	Adult Male	Hyp	Adult Male Brain	440.0913089	0.030594707	0.056502348	0.292883397	0.588378679	0.716405521	Not Sig	2238.28047	-0.027743834	0.034056054	0.663847542	0.415204893	0.96600323	Not Sig	87812	NA	1	12	10	119976.4	0.073446328	16963.2	0.176298727
ARID4B	NW_005081589.1	2910271	2998083	Adult Male	AMV	Adult Male Brain	379.6255028	0.011872128	0.06488991	0.033413149	0.854960724	0.915010877	Not Sig	2059.699185	-0.095068997	0.039872222	5.6890681	0.017070918	0.444875617	Not Sig	87812	NA	1	12	10	119976.4	0.073446328	16963.2	0.176298727
ARID4B	NW_005081589.1	2910271	2998083	Nestling Female	Hyp	Nestling Female Brain	965.7075926	0.153882956	0.056979601	7.278355238	0.006979041	0.016870083	Sig	4234.592667	0.003433942	0.055866946	0.003792415	0.950895245	0.996896415	Not Sig	87812	NA	1	12	10	119976.4	0.073446328	16963.2	0.176298727
ARID4B	NW_005081589.1	2910271	2998083	Nestling Female	AMV	Nestling Female Brain	854.6988042	0.017494465	0.078439242	0.049599032	0.823762463	0.899138442	Not Sig	3461.392099	-0.11054168	0.0677278	2.668094739	0.102378516	0.996634902	Not Sig	87812	NA	1	12	10	119976.4	0.073446328	16963.2	0.176298727
ARID4B	NW_005081589.1	2910271	2998083	Nestling Male	Hyp	Nestling Male Brain	978.2324426	0.104821192	0.071138644	2.168059452	0.14090394	0.276184706	Not Sig	4630.123708	-0.010784269	0.095240691	0.01282285	0.909841849	1	Not Sig	87812	NA	1	12	10	119976.4	0.073446328	16963.2	0.176298727
ARID4B	NW_005081589.1	2910271	2998083	Nestling Male	AMV	Nestling Male Brain	908.3727829	0.119899745	0.087560614	1.869354962	0.171548975	0.310951294	Not Sig	3772.615393	0.05830153	0.104782755	0.310259112	0.577521228	0.891053662	Not Sig	87812	NA	1	12	10	119976.4	0.073446328	16963.2	0.176298727
ARMC2	NW_005081561.1	1660537	1729824	Adult Female	Hyp	Adult Female Brain	227.2593724	-0.154796721	0.16061952	0.923544662	0.336545978	0.525571802	Not Sig	2285.918359	0.034446837	0.082063693	0.176104769	0.674742334	0.998912819	Not Sig	69287	NA	2	NA	0	133704.75	0.031316969	61670.775	0.002858628
ARMC2	NW_005081561.1	1660537	1729824	Adult Female	AMV	Adult Female Brain	199.2781564	-0.218226517	0.178974928	1.475122823	0.224539164	0.377394463	Not Sig	1781.71149	0.223434254	0.116876278	3.63530076	0.056566383	0.658611483	Not Sig	69287	NA	2	NA	0	133704.75	0.031316969	61670.775	0.002858628
ARMC2	NW_005081561.1	1660537	1729824	Adult Male	Heart	Adult Male Horton et al	0.722622115	-0.333728288	2.943937848	0.018297756	0.892399039	100	Not Sig	NA	NA	NA	NA	NA	NA	NA	69287	NA	2	NA	0	133704.75	0.031316969	61670.775	0.002858628
ARMC2	NW_005081561.1	1660537	1729824	Adult Male	Liver	Adult Male Horton et al	0	NA	NA	NA	NA	100	Not Sig	NA	NA	NA	NA	NA	NA	NA	69287	NA	2	NA	0	133704.75	0.031316969	61670.775	0.002858628
ARMC2	NW_005081561.1	1660537	1729824	Adult Male	Hyp	Adult Male Brain	78.9084304	-0.116703501	0.128489857	0.822567563	0.364430539	0.506447724	Not Sig	1084.58177	-0.027154747	0.047312458	0.329906217	0.565714316	0.981669138	Not Sig	69287	NA	2	NA	0	133704.75	0.031316969	61670.775	0.002858628
ARMC2	NW_005081561.1	1660537	1729824	Adult Male	AMV	Adult Male Brain	58.00982931	-0.288605568	0.180330382	2.517349319	0.112599714	0.191822965	Not Sig	800.3166803	-0.106509329	0.142425698	0.559662521	0.45439625	0.911804867	Not Sig	69287	NA	2	NA	0	133704.75	0.031316969	61670.775	0.002858628
ARMC2	NW_005081561.1	1660537	1729824	Nestling Female	Hyp	Nestling Female Brain	223.7169744	0.128925277	0.11968455	1.150158992	0.28351587	0.399528645	Not Sig	2029.554019	0.067746819	0.087443955	0.600308058	0.438460512	0.972210088	Not Sig	69287	NA	2	NA	0	133704.75	0.031316969	61670.775	0.002858628
ARMC2	NW_005081561.1	1660537	1729824	Nestling Female	AMV	Nestling Female Brain	197.3157057	-0.156337961	0.134934255	1.335622103	0.247807497	0.395193775	Not Sig	1840.541963	-0.201848253	0.099783377	4.100731579	0.042864662	0.996634902	Not Sig	69287	NA	2	NA	0	133704.75	0.031316969	61670.775	0.002858628
ARMC2	NW_005081561.1	1660537	1729824	Nestling Male	Hyp	Nestling Male Brain	182.0201745	-0.110255575	0.172113775	0.405524386	0.524249936	0.711807677	Not Sig	2186.653307	-0.225248925	0.111440035	4.056811542	0.043993492	0.750490116	Not Sig	69287	NA	2	NA	0	133704.75	0.031316969	61670.775	0.002858628
ARMC2	NW_005081561.1	1660537	1729824	Nestling Male	AMV	Nestling Male Brain	190.6172182	-0.107740861	0.158033412	0.462720576	0.496355245	0.674183306	Not Sig	1867.01644	-0.207840762	0.14077556	2.160028142	0.141642096	0.672304935	Not Sig	69287	NA	2	NA	0	133704.75	0.031316969	61670.775	0.002858628
ARMT1	NW_005081596.1	1668105	1676653	Adult Female	Hyp	Adult Female Brain	1912.046429	-0.40037305	0.062873633	40.40075539	2.07e-10	2.86e-09	Sig	2676.142062	0.526042691	0.703849851	0.549492416	0.458525167	0.998912819	Not Sig	8548	NA	1	10	15	85831.9	0.373660627	15762.9	0.491164241
ARMT1	NW_005081596.1	1668105	1676653	Adult Female	AMV	Adult Female Brain	1676.742151	-0.340534065	0.06446698	27.82738886	1.33e-07	9.56e-07	Sig	3367.169186	0.207354541	0.585591671	0.124728076	0.723962029	0.992913561	Not Sig	8548	NA	1	10	15	85831.9	0.373660627	15762.9	0.491164241
ARMT1	NW_005081596.1	1668105	1676653	Adult Male	Heart	Adult Male Horton et al	507.7102947	-0.88858564	0.042779494	429.6152029	1.97e-95	1.89e-93	Sig	NA	NA	NA	NA	NA	NA	NA	8548	NA	1	10	15	85831.9	0.373660627	15762.9	0.491164241
ARMT1	NW_005081596.1	1668105	1676653	Adult Male	Liver	Adult Male Horton et al	176.3453173	-0.792366211	0.073035491	116.8713645	3.06e-27	7e-26	Sig	NA	NA	NA	NA	NA	NA	NA	8548	NA	1	10	15	85831.9	0.373660627	15762.9	0.491164241
ARMT1	NW_005081596.1	1668105	1676653	Adult Male	Hyp	Adult Male Brain	1139.877866	-0.411248295	0.036819068	124.6889484	5.95e-29	1.49e-27	Sig	3649.822612	-0.090153403	0.038615587	5.455654844	0.019505092	0.464933003	Not Sig	8548	NA	1	10	15	85831.9	0.373660627	15762.9	0.491164241
ARMT1	NW_005081596.1	1668105	1676653	Adult Male	AMV	Adult Male Brain	827.5449474	-0.212624698	0.04573496	21.59354026	3.37e-06	1.42e-05	Sig	2660.255484	-0.141041354	0.046392996	9.253435886	0.00235054	0.150656911	Not Sig	8548	NA	1	10	15	85831.9	0.373660627	15762.9	0.491164241
ARMT1	NW_005081596.1	1668105	1676653	Nestling Female	Hyp	Nestling Female Brain	1611.478339	-0.550600913	0.040495868	184.4580217	5.15e-42	3.35e-40	Sig	2931.783279	0.533232799	0.465347004	1.30560955	0.253191111	0.89172471	Not Sig	8548	NA	1	10	15	85831.9	0.373660627	15762.9	0.491164241
ARMT1	NW_005081596.1	1668105	1676653	Nestling Female	AMV	Nestling Female Brain	1218.121934	-0.563428586	0.083956578	44.63475718	2.37e-11	3.15e-10	Sig	2924.965075	-0.010833935	0.462144109	0.000549823	0.981292669	0.996812692	Not Sig	8548	NA	1	10	15	85831.9	0.373660627	15762.9	0.491164241
ARMT1	NW_005081596.1	1668105	1676653	Nestling Male	Hyp	Nestling Male Brain	1655.504853	-0.417357906	0.063154094	43.47095296	4.3e-11	8.4e-10	Sig	3694.781923	-1.365619745	0.485239665	7.366689728	0.006644313	0.402007121	Not Sig	8548	NA	1	10	15	85831.9	0.373660627	15762.9	0.491164241
ARMT1	NW_005081596.1	1668105	1676653	Nestling Male	AMV	Nestling Male Brain	1398.981115	-0.541866293	0.105981427	25.76528193	3.86e-07	3.8e-06	Sig	3290.447487	-0.028240718	0.385734103	0.005353992	0.941670059	0.993319401	Not Sig	8548	NA	1	10	15	85831.9	0.373660627	15762.9	0.491164241
ARV1	NW_005081653.1	1061193	1066871	Adult Female	Hyp	Adult Female Brain	182.1240776	-0.701928314	0.199767536	12.06553715	0.000513625	0.002037056	Sig	739.8860988	-0.328997858	0.104832751	9.891874415	0.001660102	0.181790331	Not Sig	5678	NA	NA	NA	4	61955.2	0.851353984	18671.1	0.325363825
ARV1	NW_005081653.1	1061193	1066871	Adult Female	AMV	Adult Female Brain	230.3606328	-0.716252962	0.169392463	17.63080085	2.68e-05	0.00013336	Sig	848.2296454	-0.298713084	0.159557547	3.518815524	0.060675796	0.660549815	Not Sig	5678	NA	NA	NA	4	61955.2	0.851353984	18671.1	0.325363825
ARV1	NW_005081653.1	1061193	1066871	Adult Male	Heart	Adult Male Horton et al	17.53909982	-0.505012163	0.226155232	4.740998014	0.029451981	0.054319752	Not Sig	NA	NA	NA	NA	NA	NA	NA	5678	NA	NA	NA	4	61955.2	0.851353984	18671.1	0.325363825
ARV1	NW_005081653.1	1061193	1066871	Adult Male	Liver	Adult Male Horton et al	54.46121761	-0.104476785	0.193658692	0.274985011	0.600007218	0.731610533	Not Sig	NA	NA	NA	NA	NA	NA	NA	5678	NA	NA	NA	4	61955.2	0.851353984	18671.1	0.325363825
ARV1	NW_005081653.1	1061193	1066871	Adult Male	Hyp	Adult Male Brain	106.7953088	0.396028336	0.122377647	10.40845688	0.001254395	0.003675832	Sig	411.8426252	0.205286169	0.068799099	8.88772961	0.002870935	0.156192539	Not Sig	5678	NA	NA	NA	4	61955.2	0.851353984	18671.1	0.325363825
ARV1	NW_005081653.1	1061193	1066871	Adult Male	AMV	Adult Male Brain	112.1401542	0.038490842	0.157428643	0.058496906	0.808887611	0.888756765	Not Sig	464.0386667	0.080850974	0.072149097	1.257011969	0.262217443	0.825828241	Not Sig	5678	NA	NA	NA	4	61955.2	0.851353984	18671.1	0.325363825
ARV1	NW_005081653.1	1061193	1066871	Nestling Female	Hyp	Nestling Female Brain	175.1220539	-0.240528803	0.122121805	3.857627223	0.049520314	0.095628614	Not Sig	644.8881796	-0.065924832	0.10908167	0.365188064	0.545638941	0.98259174	Not Sig	5678	NA	NA	NA	4	61955.2	0.851353984	18671.1	0.325363825
ARV1	NW_005081653.1	1061193	1066871	Nestling Female	AMV	Nestling Female Brain	196.8171485	-0.21324226	0.135609094	2.460099354	0.116771396	0.217762873	Not Sig	708.3595504	0.156357527	0.147838461	1.115693879	0.290847566	0.996634902	Not Sig	5678	NA	NA	NA	4	61955.2	0.851353984	18671.1	0.325363825
ARV1	NW_005081653.1	1061193	1066871	Nestling Male	Hyp	Nestling Male Brain	161.1337297	-0.319838702	0.179321275	3.143323143	0.076238327	0.166470588	Not Sig	716.9667804	-0.194730568	0.09773671	3.951038418	0.046842454	0.760163492	Not Sig	5678	NA	NA	NA	4	61955.2	0.851353984	18671.1	0.325363825
ARV1	NW_005081653.1	1061193	1066871	Nestling Male	AMV	Nestling Male Brain	241.705048	-0.036138156	0.148981677	0.058496468	0.808888311	0.89540043	Not Sig	809.3199354	0.043366452	0.111907396	0.15043261	0.698122283	0.929924122	Not Sig	5678	NA	NA	NA	4	61955.2	0.851353984	18671.1	0.325363825
ASAP2	NW_005081582.1	1282723	1365917	Adult Female	Hyp	Adult Female Brain	910.20536	-0.083836003	0.081213723	1.064154957	0.302269445	0.4819545	Not Sig	4126.987557	-0.016792254	0.088940547	0.035661014	0.850217249	0.998912819	Not Sig	83194	NA	1	4	4	84283.38	0.420261056	6639.454	0.133752621
ASAP2	NW_005081582.1	1282723	1365917	Adult Female	AMV	Adult Female Brain	759.60047	-0.054442053	0.096304166	0.318662755	0.57241239	0.720485176	Not Sig	3234.912938	0.018232063	0.107656252	0.028673872	0.86553424	0.994966552	Not Sig	83194	NA	1	4	4	84283.38	0.420261056	6639.454	0.133752621
ASAP2	NW_005081582.1	1282723	1365917	Adult Male	Heart	Adult Male Horton et al	81.7716799	0.579450552	0.101919791	31.97679162	1.56e-08	7.18e-08	Sig	NA	NA	NA	NA	NA	NA	NA	83194	NA	1	4	4	84283.38	0.420261056	6639.454	0.133752621
ASAP2	NW_005081582.1	1282723	1365917	Adult Male	Liver	Adult Male Horton et al	34.18077255	-0.001100438	0.171267243	3.89e-05	0.995026143	0.998817305	Not Sig	NA	NA	NA	NA	NA	NA	NA	83194	NA	1	4	4	84283.38	0.420261056	6639.454	0.133752621
ASAP2	NW_005081582.1	1282723	1365917	Adult Male	Hyp	Adult Male Brain	341.8064989	0.007252413	0.06793834	0.011372754	0.915072113	0.945686621	Not Sig	2016.354606	-0.057475306	0.078034657	0.542756578	0.461292551	0.970132487	Not Sig	83194	NA	1	4	4	84283.38	0.420261056	6639.454	0.133752621
ASAP2	NW_005081582.1	1282723	1365917	Adult Male	AMV	Adult Male Brain	255.4255749	-0.023554222	0.069968019	0.113233057	0.736492947	0.838855935	Not Sig	1577.972089	-0.143872297	0.070773656	4.137634519	0.041939737	0.568552797	Not Sig	83194	NA	1	4	4	84283.38	0.420261056	6639.454	0.133752621
ASAP2	NW_005081582.1	1282723	1365917	Nestling Female	Hyp	Nestling Female Brain	1074.975158	0.180566118	0.05031377	12.86279582	0.000335179	0.001135886	Sig	4790.632091	0.105546916	0.178221764	0.350649983	0.553745421	0.98259174	Not Sig	83194	NA	1	4	4	84283.38	0.420261056	6639.454	0.133752621
ASAP2	NW_005081582.1	1282723	1365917	Nestling Female	AMV	Nestling Female Brain	806.0935018	-0.078653233	0.097838107	0.642258629	0.422894096	0.578197345	Not Sig	3606.594814	-0.225197803	0.151212366	2.22369554	0.135907401	0.996634902	Not Sig	83194	NA	1	4	4	84283.38	0.420261056	6639.454	0.133752621
ASAP2	NW_005081582.1	1282723	1365917	Nestling Male	Hyp	Nestling Male Brain	1135.32694	0.203686835	0.06814183	8.91640449	0.002826204	0.01061526	Sig	5753.463994	-0.079928553	0.109053838	0.535898093	0.464137679	0.995064234	Not Sig	83194	NA	1	4	4	84283.38	0.420261056	6639.454	0.133752621
ASAP2	NW_005081582.1	1282723	1365917	Nestling Male	AMV	Nestling Male Brain	949.7448457	-0.077369372	0.085331901	0.819830415	0.365229753	0.545473008	Not Sig	4099.112574	-0.10186947	0.121341281	0.701792692	0.402181979	0.825599685	Not Sig	83194	NA	1	4	4	84283.38	0.420261056	6639.454	0.133752621
ASB3	NW_005081577.1	1394144	1408735	Adult Female	Hyp	Adult Female Brain	143.0827802	0.068627197	0.207887752	0.10765528	0.742829522	0.874259605	Not Sig	626.7435464	0.241979068	0.142515965	2.87016494	0.090235622	0.943411049	Not Sig	14591	NA	1	NA	20	70330.1	0.702318333	4478.365	0.440251572
ASB3	NW_005081577.1	1394144	1408735	Adult Female	AMV	Adult Female Brain	103.0645431	0.259679092	0.275902007	0.854978799	0.355147665	0.520178209	Not Sig	505.5068089	0.248915739	0.098526728	6.35646026	0.011695464	0.358556248	Not Sig	14591	NA	1	NA	20	70330.1	0.702318333	4478.365	0.440251572
ASB3	NW_005081577.1	1394144	1408735	Adult Male	Heart	Adult Male Horton et al	3.394451069	0.542762362	2.931319967	0.036830884	0.847809775	0.896124282	Not Sig	NA	NA	NA	NA	NA	NA	NA	14591	NA	1	NA	20	70330.1	0.702318333	4478.365	0.440251572
ASB3	NW_005081577.1	1394144	1408735	Adult Male	Liver	Adult Male Horton et al	5.326678523	-0.90409534	2.926223389	0.092758388	0.760699295	0.857462248	Not Sig	NA	NA	NA	NA	NA	NA	NA	14591	NA	1	NA	20	70330.1	0.702318333	4478.365	0.440251572
ASB3	NW_005081577.1	1394144	1408735	Adult Male	Hyp	Adult Male Brain	55.65322506	0.233031446	0.162151761	2.050856675	0.152120573	0.251225813	Not Sig	267.1011336	0.170552725	0.100189473	2.892132594	0.089013029	0.808726722	Not Sig	14591	NA	1	NA	20	70330.1	0.702318333	4478.365	0.440251572
ASB3	NW_005081577.1	1394144	1408735	Adult Male	AMV	Adult Male Brain	40.588385	0.29259654	0.222902997	1.676237461	0.195425157	0.304188562	Not Sig	213.0440722	0.042961793	0.09555019	0.207027435	0.649107314	0.954344696	Not Sig	14591	NA	1	NA	20	70330.1	0.702318333	4478.365	0.440251572
ASB3	NW_005081577.1	1394144	1408735	Nestling Female	Hyp	Nestling Female Brain	150.0277352	0.493607688	0.123932296	15.7943334	7.06e-05	0.000273233	Sig	677.3878005	0.210275472	0.106862508	3.870298217	0.049147788	0.584193177	Not Sig	14591	NA	1	NA	20	70330.1	0.702318333	4478.365	0.440251572
ASB3	NW_005081577.1	1394144	1408735	Nestling Female	AMV	Nestling Female Brain	130.4287351	0.092195022	0.185492909	0.243702351	0.621544777	0.754160427	Not Sig	592.0384984	0.028960285	0.120567372	0.057681484	0.810198704	0.996634902	Not Sig	14591	NA	1	NA	20	70330.1	0.702318333	4478.365	0.440251572
ASB3	NW_005081577.1	1394144	1408735	Nestling Male	Hyp	Nestling Male Brain	141.6347558	0.445549604	0.185245838	5.715807809	0.016812827	0.046981969	Sig	707.6776739	-0.006576468	0.127700096	0.002832696	0.957554168	1	Not Sig	14591	NA	1	NA	20	70330.1	0.702318333	4478.365	0.440251572
ASB3	NW_005081577.1	1394144	1408735	Nestling Male	AMV	Nestling Male Brain	140.3708972	-0.096436269	0.229969862	0.171744089	0.678566409	0.809913036	Not Sig	632.3303498	0.003469257	0.109378338	0.001282399	0.971433386	0.999429716	Not Sig	14591	NA	1	NA	20	70330.1	0.702318333	4478.365	0.440251572
ASCC3	NW_005081553.1	9182502	9441284	Adult Female	Hyp	Adult Female Brain	128.399375	0.501498413	0.221544813	5.041870496	0.024741761	0.063890886	Not Sig	2571.530553	0.115736685	0.122322282	0.893027916	0.344658088	0.998912819	Not Sig	258782	NA	2	3	0	180313.6429	0.011995213	3034.714286	0.721673156
ASCC3	NW_005081553.1	9182502	9441284	Adult Female	AMV	Adult Female Brain	83.28865479	0.054363572	0.258101729	0.044055054	0.833751218	0.901761136	Not Sig	2041.367176	0.008668204	0.072666405	0.014255126	0.904962556	0.996882595	Not Sig	258782	NA	2	3	0	180313.6429	0.011995213	3034.714286	0.721673156
ASCC3	NW_005081553.1	9182502	9441284	Adult Male	Heart	Adult Male Horton et al	38.76766629	0.196771875	0.170786794	1.285806093	0.256822275	0.352062232	Not Sig	NA	NA	NA	NA	NA	NA	NA	258782	NA	2	3	0	180313.6429	0.011995213	3034.714286	0.721673156
ASCC3	NW_005081553.1	9182502	9441284	Adult Male	Liver	Adult Male Horton et al	61.72185495	0.016297302	0.500540696	0.000857219	0.976642627	0.991902668	Not Sig	NA	NA	NA	NA	NA	NA	NA	258782	NA	2	3	0	180313.6429	0.011995213	3034.714286	0.721673156
ASCC3	NW_005081553.1	9182502	9441284	Adult Male	Hyp	Adult Male Brain	43.08317176	0.034126452	0.233583489	0.020548328	0.886016233	0.93022862	Not Sig	1070.555693	0.296687649	0.065566597	20.39063032	6.31e-06	0.001185787	Sig	258782	NA	2	3	0	180313.6429	0.011995213	3034.714286	0.721673156
ASCC3	NW_005081553.1	9182502	9441284	Adult Male	AMV	Adult Male Brain	33.05483449	0.593887326	0.263887634	4.833492032	0.027912041	0.055931025	Not Sig	782.5574554	0.311532863	0.085852	13.10501741	0.000294506	0.038801157	Sig	258782	NA	2	3	0	180313.6429	0.011995213	3034.714286	0.721673156
ASCC3	NW_005081553.1	9182502	9441284	Nestling Female	Hyp	Nestling Female Brain	132.6167836	0.333473355	0.166733001	3.917626398	0.047782299	0.093314961	Not Sig	2855.234628	0.165807508	0.084468598	3.852149905	0.049682269	0.587150335	Not Sig	258782	NA	2	3	0	180313.6429	0.011995213	3034.714286	0.721673156
ASCC3	NW_005081553.1	9182502	9441284	Nestling Female	AMV	Nestling Female Brain	120.2476936	0.189181116	0.184780263	1.03624219	0.308697052	0.463045579	Not Sig	2891.373637	-0.107874282	0.185335275	0.339299828	0.560233654	0.996634902	Not Sig	258782	NA	2	3	0	180313.6429	0.011995213	3034.714286	0.721673156
ASCC3	NW_005081553.1	9182502	9441284	Nestling Male	Hyp	Nestling Male Brain	142.9537213	0.220666336	0.18475427	1.412388222	0.234660339	0.411031652	Not Sig	3285.411158	0.149035651	0.108507492	1.894008789	0.168750462	0.983301781	Not Sig	258782	NA	2	3	0	180313.6429	0.011995213	3034.714286	0.721673156
ASCC3	NW_005081553.1	9182502	9441284	Nestling Male	AMV	Nestling Male Brain	143.5057683	0.086692002	0.194354849	0.196908544	0.657227837	0.796523199	Not Sig	3092.646225	-0.014065113	0.159276662	0.007803065	0.929610453	0.989453771	Not Sig	258782	NA	2	3	0	180313.6429	0.011995213	3034.714286	0.721673156
ASF1A	NW_005081697.1	539769	547619	Adult Female	Hyp	Adult Female Brain	174.6461205	-0.398858348	0.197895378	3.998762926	0.045533672	0.10611062	Not Sig	528.3475931	0.022578308	0.150008127	0.022651473	0.880366944	0.998912819	Not Sig	7850	NA	NA	NA	15	73664.45	0.634619131	13516.1	0.68970894
ASF1A	NW_005081697.1	539769	547619	Adult Female	AMV	Adult Female Brain	141.5505166	-0.286290017	0.224634534	1.594517449	0.206681902	0.356875181	Not Sig	433.4966588	-0.02420122	0.109771569	0.04864688	0.825434756	0.992913561	Not Sig	7850	NA	NA	NA	15	73664.45	0.634619131	13516.1	0.68970894
ASF1A	NW_005081697.1	539769	547619	Adult Male	Heart	Adult Male Horton et al	25.50844759	0.278436971	0.16982776	2.63363355	0.104622039	0.165142452	Not Sig	NA	NA	NA	NA	NA	NA	NA	7850	NA	NA	NA	15	73664.45	0.634619131	13516.1	0.68970894
ASF1A	NW_005081697.1	539769	547619	Adult Male	Liver	Adult Male Horton et al	34.30987207	0.674103958	0.165578116	16.21889968	5.64e-05	0.000195418	Sig	NA	NA	NA	NA	NA	NA	NA	7850	NA	NA	NA	15	73664.45	0.634619131	13516.1	0.68970894
ASF1A	NW_005081697.1	539769	547619	Adult Male	Hyp	Adult Male Brain	68.24020167	0.140410141	0.164021857	0.722394555	0.395359573	0.537285927	Not Sig	296.4253909	0.173856145	0.100240791	3.005737755	0.082970197	0.793250627	Not Sig	7850	NA	NA	NA	15	73664.45	0.634619131	13516.1	0.68970894
ASF1A	NW_005081697.1	539769	547619	Adult Male	AMV	Adult Male Brain	61.34914377	0.063073932	0.20349887	0.093198706	0.760149381	0.853129026	Not Sig	252.8394186	0.195777533	0.103869595	3.546411413	0.059674378	0.618937992	Not Sig	7850	NA	NA	NA	15	73664.45	0.634619131	13516.1	0.68970894
ASF1A	NW_005081697.1	539769	547619	Nestling Female	Hyp	Nestling Female Brain	152.7140534	-0.139719042	0.133160504	1.093364111	0.295727031	0.414417474	Not Sig	474.1013417	0.045135273	0.091710482	0.24284634	0.622157854	0.987010054	Not Sig	7850	NA	NA	NA	15	73664.45	0.634619131	13516.1	0.68970894
ASF1A	NW_005081697.1	539769	547619	Nestling Female	AMV	Nestling Female Brain	152.6884179	0.22832177	0.207157461	1.183796646	0.276584427	0.427526464	Not Sig	438.3705512	0.275400491	0.202914135	1.831477832	0.175953091	0.996634902	Not Sig	7850	NA	NA	NA	15	73664.45	0.634619131	13516.1	0.68970894
ASF1A	NW_005081697.1	539769	547619	Nestling Male	Hyp	Nestling Male Brain	165.335069	0.013445218	0.186954018	0.005079624	0.943181691	0.979940673	Not Sig	527.7459555	0.1314776	0.13002665	1.025745988	0.311159911	0.995064234	Not Sig	7850	NA	NA	NA	15	73664.45	0.634619131	13516.1	0.68970894
ASF1A	NW_005081697.1	539769	547619	Nestling Male	AMV	Nestling Male Brain	131.5962158	0.122064671	0.313184609	0.13992398	0.708356598	0.824480783	Not Sig	402.1709674	0.023528235	0.10706215	0.048755402	0.825243294	0.963365996	Not Sig	7850	NA	NA	NA	15	73664.45	0.634619131	13516.1	0.68970894
ASRGL1	NW_005081654.1	84844	105101	Adult Female	Hyp	Adult Female Brain	323.7806074	0.231622976	0.147041563	2.458881332	0.116861984	0.226191427	Not Sig	1969.203242	-0.152770084	0.098895202	2.392684329	0.121904144	0.985813468	Not Sig	20257	NA	NA	NA	12	75058.55	0.595265927	3294.525	0.668064291
ASRGL1	NW_005081654.1	84844	105101	Adult Female	AMV	Adult Female Brain	357.4244168	0.146956547	0.158894215	0.842855325	0.358581421	0.523967954	Not Sig	2047.329886	-0.009160815	0.106396053	0.007447218	0.93123011	0.997063119	Not Sig	20257	NA	NA	NA	12	75058.55	0.595265927	3294.525	0.668064291
ASRGL1	NW_005081654.1	84844	105101	Adult Male	Heart	Adult Male Horton et al	14.9214203	1.303729089	0.468148461	5.836596165	0.015696163	0.030648264	Sig	NA	NA	NA	NA	NA	NA	NA	20257	NA	NA	NA	12	75058.55	0.595265927	3294.525	0.668064291
ASRGL1	NW_005081654.1	84844	105101	Adult Male	Liver	Adult Male Horton et al	42.85944064	1.445920776	0.288771417	21.46428504	3.6e-06	1.58e-05	Sig	NA	NA	NA	NA	NA	NA	NA	20257	NA	NA	NA	12	75058.55	0.595265927	3294.525	0.668064291
ASRGL1	NW_005081654.1	84844	105101	Adult Male	Hyp	Adult Male Brain	148.9854505	0.187936239	0.098524165	3.627840485	0.0568205	0.108092524	Not Sig	1061.788101	0.054311887	0.158432206	0.117428778	0.731840093	0.989305346	Not Sig	20257	NA	NA	NA	12	75058.55	0.595265927	3294.525	0.668064291
ASRGL1	NW_005081654.1	84844	105101	Adult Male	AMV	Adult Male Brain	147.0342794	0.184372406	0.090654528	4.132160851	0.042075592	0.080902701	Not Sig	1116.520782	0.178586869	0.092024361	3.756666931	0.052597326	0.602919369	Not Sig	20257	NA	NA	NA	12	75058.55	0.595265927	3294.525	0.668064291
ASRGL1	NW_005081654.1	84844	105101	Nestling Female	Hyp	Nestling Female Brain	275.6312392	0.01586394	0.094831466	0.027907635	0.867326156	0.901219663	Not Sig	1635.724688	-0.027189374	0.082972511	0.107549052	0.742951947	0.993478163	Not Sig	20257	NA	NA	NA	12	75058.55	0.595265927	3294.525	0.668064291
ASRGL1	NW_005081654.1	84844	105101	Nestling Female	AMV	Nestling Female Brain	244.9177621	0.099491428	0.141152533	0.492352556	0.482879756	0.632633604	Not Sig	1364.870709	0.28582636	0.15845689	3.234046934	0.072122256	0.996634902	Not Sig	20257	NA	NA	NA	12	75058.55	0.595265927	3294.525	0.668064291
ASRGL1	NW_005081654.1	84844	105101	Nestling Male	Hyp	Nestling Male Brain	271.8118399	0.307072111	0.13721865	4.971571819	0.025767221	0.067216163	Not Sig	1807.440019	-0.206329878	0.104424416	3.878494836	0.048908385	0.762390195	Not Sig	20257	NA	NA	NA	12	75058.55	0.595265927	3294.525	0.668064291
ASRGL1	NW_005081654.1	84844	105101	Nestling Male	AMV	Nestling Male Brain	257.9783633	0.203556765	0.185935971	1.17372889	0.278636377	0.439784756	Not Sig	1592.414645	-0.027738536	0.142557346	0.03789783	0.845648441	0.97042533	Not Sig	20257	NA	NA	NA	12	75058.55	0.595265927	3294.525	0.668064291
ATAD2B	NW_005081561.1	3925014	3981715	Adult Female	Hyp	Adult Female Brain	325.0442703	-0.341177548	0.141317917	5.784692919	0.016166322	0.045188309	Sig	1295.754451	-0.03891362	0.145167771	0.071950899	0.788517168	0.998912819	Not Sig	56701	NA	3	4	23	74744.925	0.605250341	8906.4425	0.665755209
ATAD2B	NW_005081561.1	3925014	3981715	Adult Female	AMV	Adult Female Brain	238.9897487	-0.172723818	0.163327662	1.111198134	0.291821649	0.455355808	Not Sig	813.5930482	0.288137029	0.157748633	3.31104048	0.068815908	0.677516674	Not Sig	56701	NA	3	4	23	74744.925	0.605250341	8906.4425	0.665755209
ATAD2B	NW_005081561.1	3925014	3981715	Adult Male	Heart	Adult Male Horton et al	89.25637311	0.435384447	0.084765353	26.25675684	2.99e-07	1.19e-06	Sig	NA	NA	NA	NA	NA	NA	NA	56701	NA	3	4	23	74744.925	0.605250341	8906.4425	0.665755209
ATAD2B	NW_005081561.1	3925014	3981715	Adult Male	Liver	Adult Male Horton et al	130.9045474	0.107323153	0.088995539	1.439732868	0.230182573	0.351725632	Not Sig	NA	NA	NA	NA	NA	NA	NA	56701	NA	3	4	23	74744.925	0.605250341	8906.4425	0.665755209
ATAD2B	NW_005081561.1	3925014	3981715	Adult Male	Hyp	Adult Male Brain	93.01735551	-0.037739142	0.126405437	0.088672152	0.765872075	0.857124918	Not Sig	486.2208278	0.033864495	0.105210409	0.103577374	0.74757816	0.989305346	Not Sig	56701	NA	3	4	23	74744.925	0.605250341	8906.4425	0.665755209
ATAD2B	NW_005081561.1	3925014	3981715	Adult Male	AMV	Adult Male Brain	54.85552897	-0.250548999	0.169846897	2.153073021	0.142284853	0.232184019	Not Sig	343.3787953	-0.181689803	0.09656485	3.543621505	0.059774816	0.618937992	Not Sig	56701	NA	3	4	23	74744.925	0.605250341	8906.4425	0.665755209
ATAD2B	NW_005081561.1	3925014	3981715	Nestling Female	Hyp	Nestling Female Brain	349.4746902	0.098280363	0.092281419	1.129209851	0.287943942	0.404056654	Not Sig	1182.882166	0.135536597	0.111343222	1.48121637	0.223584307	0.876599497	Not Sig	56701	NA	3	4	23	74744.925	0.605250341	8906.4425	0.665755209
ATAD2B	NW_005081561.1	3925014	3981715	Nestling Female	AMV	Nestling Female Brain	282.4090644	0.049855718	0.105601437	0.222492292	0.637147443	0.762367172	Not Sig	1005.269929	-0.246901828	0.173074149	2.040770445	0.153132069	0.996634902	Not Sig	56701	NA	3	4	23	74744.925	0.605250341	8906.4425	0.665755209
ATAD2B	NW_005081561.1	3925014	3981715	Nestling Male	Hyp	Nestling Male Brain	377.0406425	-0.103452317	0.118770267	0.754897243	0.38493015	0.592575569	Not Sig	1405.652763	-0.184948829	0.173191624	1.13388085	0.286949058	0.995064234	Not Sig	56701	NA	3	4	23	74744.925	0.605250341	8906.4425	0.665755209
ATAD2B	NW_005081561.1	3925014	3981715	Nestling Male	AMV	Nestling Male Brain	291.2070286	-0.003611795	0.237594774	0.000227352	0.987969805	0.998344979	Not Sig	1141.039147	-0.295541398	0.184780912	2.525392528	0.112026901	0.640464519	Not Sig	56701	NA	3	4	23	74744.925	0.605250341	8906.4425	0.665755209
ATF3	NW_005081548.1	3647151	3652223	Adult Female	Hyp	Adult Female Brain	226.7671114	0.185911634	0.150245456	1.528354301	0.216359603	0.367356935	Not Sig	592.7978553	0.550116692	0.277981216	3.851882198	0.049690199	0.82697837	Not Sig	5072	NA	NA	1	11	88663.2	0.323202805	30558.9	0.058212058
ATF3	NW_005081548.1	3647151	3652223	Adult Female	AMV	Adult Female Brain	83.40341479	-0.253967553	0.254136385	0.994450197	0.318657134	0.484070385	Not Sig	232.3583632	0.092752307	0.315325798	0.086362071	0.768854	0.992913561	Not Sig	5072	NA	NA	1	11	88663.2	0.323202805	30558.9	0.058212058
ATF3	NW_005081548.1	3647151	3652223	Adult Male	Heart	Adult Male Horton et al	108.7944539	0.369480215	0.071158743	26.94670799	2.09e-07	8.41e-07	Sig	NA	NA	NA	NA	NA	NA	NA	5072	NA	NA	1	11	88663.2	0.323202805	30558.9	0.058212058
ATF3	NW_005081548.1	3647151	3652223	Adult Male	Liver	Adult Male Horton et al	567.5404451	0.494180139	0.145741597	11.04017803	0.000891583	0.002553856	Sig	NA	NA	NA	NA	NA	NA	NA	5072	NA	NA	1	11	88663.2	0.323202805	30558.9	0.058212058
ATF3	NW_005081548.1	3647151	3652223	Adult Male	Hyp	Adult Male Brain	60.17920444	0.192156058	0.182117465	1.092083499	0.296010033	0.428339141	Not Sig	183.0709207	0.189443311	0.164098288	1.330345062	0.24874384	0.943013922	Not Sig	5072	NA	NA	1	11	88663.2	0.323202805	30558.9	0.058212058
ATF3	NW_005081548.1	3647151	3652223	Adult Male	AMV	Adult Male Brain	32.06562481	0.428313681	0.233341704	3.295731345	0.069460169	0.126798145	Not Sig	95.12640513	0.222594506	0.170831495	1.698489745	0.192485604	0.79605193	Not Sig	5072	NA	NA	1	11	88663.2	0.323202805	30558.9	0.058212058
ATF3	NW_005081548.1	3647151	3652223	Nestling Female	Hyp	Nestling Female Brain	57.06358073	0.415388046	0.22065635	3.501816485	0.061301556	0.114060962	Not Sig	214.4296	-0.414952631	0.305548237	1.837526692	0.175241111	0.834966418	Not Sig	5072	NA	NA	1	11	88663.2	0.323202805	30558.9	0.058212058
ATF3	NW_005081548.1	3647151	3652223	Nestling Female	AMV	Nestling Female Brain	20.2665214	0.439842594	0.533555583	0.606626393	0.436060868	0.590736909	Not Sig	86.28811535	-0.424460246	0.37947447	1.253296673	0.262923763	0.996634902	Not Sig	5072	NA	NA	1	11	88663.2	0.323202805	30558.9	0.058212058
ATF3	NW_005081548.1	3647151	3652223	Nestling Male	Hyp	Nestling Male Brain	75.67834609	0.388323083	0.304099545	1.545370341	0.213820207	0.383319275	Not Sig	261.0901589	0.003727344	0.262612664	0.000230151	0.987895976	1	Not Sig	5072	NA	NA	1	11	88663.2	0.323202805	30558.9	0.058212058
ATF3	NW_005081548.1	3647151	3652223	Nestling Male	AMV	Nestling Male Brain	32.59950136	-0.103008331	0.591637495	0.025161833	0.873964474	0.933635628	Not Sig	86.9068734	0.468582614	0.41300689	1.303909527	0.253500337	0.75145749	Not Sig	5072	NA	NA	1	11	88663.2	0.323202805	30558.9	0.058212058
ATG5	NW_005081708.1	716503	807233	Adult Female	Hyp	Adult Female Brain	NA	NA	NA	NA	NA	NA	NA	2399.501691	0.119387515	0.207681512	0.32951856	0.565942715	0.998912819	Not Sig	NA	NA	NA	NA	0	NA	-1	NA	-1
ATG5	NW_005081708.1	716503	807233	Adult Female	AMV	Adult Female Brain	NA	NA	NA	NA	NA	NA	NA	2429.423915	0.041217193	0.092808171	0.197057865	0.657106207	0.990552154	Not Sig	NA	NA	NA	NA	0	NA	-1	NA	-1
ATG5	NW_005081708.1	716503	807233	Adult Male	Heart	Adult Male Horton et al	NA	NA	NA	NA	NA	NA	NA	NA	NA	NA	NA	NA	NA	NA	NA	NA	NA	NA	0	NA	-1	NA	-1
ATG5	NW_005081708.1	716503	807233	Adult Male	Liver	Adult Male Horton et al	NA	NA	NA	NA	NA	NA	NA	NA	NA	NA	NA	NA	NA	NA	NA	NA	NA	NA	0	NA	-1	NA	-1
ATG5	NW_005081708.1	716503	807233	Adult Male	Hyp	Adult Male Brain	NA	NA	NA	NA	NA	NA	NA	1819.008423	0.027682626	0.04718001	0.344217661	0.557404767	0.981669138	Not Sig	NA	NA	NA	NA	0	NA	-1	NA	-1
ATG5	NW_005081708.1	716503	807233	Adult Male	AMV	Adult Male Brain	NA	NA	NA	NA	NA	NA	NA	1574.073949	0.038714149	0.056285936	0.47292571	0.491644275	0.92253794	Not Sig	NA	NA	NA	NA	0	NA	-1	NA	-1
ATG5	NW_005081708.1	716503	807233	Nestling Female	Hyp	Nestling Female Brain	NA	NA	NA	NA	NA	NA	NA	2367.354641	0.068537244	0.171554454	0.159581695	0.689541932	0.99229163	Not Sig	NA	NA	NA	NA	0	NA	-1	NA	-1
ATG5	NW_005081708.1	716503	807233	Nestling Female	AMV	Nestling Female Brain	NA	NA	NA	NA	NA	NA	NA	2189.344361	0.077843785	0.090252731	0.743215394	0.388632816	0.996634902	Not Sig	NA	NA	NA	NA	0	NA	-1	NA	-1
ATG5	NW_005081708.1	716503	807233	Nestling Male	Hyp	Nestling Male Brain	NA	NA	NA	NA	NA	NA	NA	2510.610583	0.069042751	0.217679365	0.100784539	0.75089018	1	Not Sig	NA	NA	NA	NA	0	NA	-1	NA	-1
ATG5	NW_005081708.1	716503	807233	Nestling Male	AMV	Nestling Male Brain	NA	NA	NA	NA	NA	NA	NA	2482.746003	0.092685478	0.164501819	0.318581238	0.572461519	0.889229809	Not Sig	NA	NA	NA	NA	0	NA	-1	NA	-1
ATL2	NW_005081615.1	268354	308799	Adult Female	Hyp	Adult Female Brain	1208.471696	0.023914026	0.071050646	0.113169105	0.736564604	0.869602629	Not Sig	3438.42675	-0.003642927	0.053141372	0.00481611	0.944672664	0.998912819	Not Sig	40445	NA	NA	5	16	NA	-1	NA	-1
ATL2	NW_005081615.1	268354	308799	Adult Female	AMV	Adult Female Brain	1139.302157	0.106734945	0.075740222	1.983195615	0.15905416	0.292007124	Not Sig	3238.272898	-0.032616709	0.077885518	0.175545645	0.675229524	0.992913561	Not Sig	40445	NA	NA	5	16	NA	-1	NA	-1
ATL2	NW_005081615.1	268354	308799	Adult Male	Heart	Adult Male Horton et al	288.975263	0.763057604	0.051175198	221.9118107	3.46e-50	9.66e-49	Sig	NA	NA	NA	NA	NA	NA	NA	40445	NA	NA	5	16	NA	-1	NA	-1
ATL2	NW_005081615.1	268354	308799	Adult Male	Liver	Adult Male Horton et al	1338.345631	-0.461888213	0.047556062	93.64272263	3.78e-22	6.52e-21	Sig	NA	NA	NA	NA	NA	NA	NA	40445	NA	NA	5	16	NA	-1	NA	-1
ATL2	NW_005081615.1	268354	308799	Adult Male	Hyp	Adult Male Brain	433.6813743	0.000640461	0.052156204	0.000150723	0.990204674	0.99779245	Not Sig	1285.523076	0.109547263	0.041603161	6.926556174	0.008492506	0.295513352	Not Sig	40445	NA	NA	5	16	NA	-1	NA	-1
ATL2	NW_005081615.1	268354	308799	Adult Male	AMV	Adult Male Brain	395.6827035	0.11222406	0.057920795	3.751426302	0.05276247	0.098905993	Not Sig	1251.175235	-0.025669748	0.037788083	0.461666345	0.496846233	0.924848552	Not Sig	40445	NA	NA	5	16	NA	-1	NA	-1
ATL2	NW_005081615.1	268354	308799	Nestling Female	Hyp	Nestling Female Brain	1134.223293	0.155264329	0.053956314	8.263101733	0.004045894	0.010515269	Sig	3198.976465	-0.010418641	0.085547822	0.01491588	0.902795599	0.996896415	Not Sig	40445	NA	NA	5	16	NA	-1	NA	-1
ATL2	NW_005081615.1	268354	308799	Nestling Female	AMV	Nestling Female Brain	1106.850786	0.089524038	0.070293686	1.617904218	0.203384262	0.338428796	Not Sig	2840.17978	0.062973473	0.11926691	0.278647664	0.597588959	0.996634902	Not Sig	40445	NA	NA	5	16	NA	-1	NA	-1
ATL2	NW_005081615.1	268354	308799	Nestling Male	Hyp	Nestling Male Brain	1141.442626	0.205949639	0.060260067	11.67166738	0.000634591	0.00291432	Sig	3632.207986	-0.013792017	0.067840755	0.041411961	0.838744801	1	Not Sig	40445	NA	NA	5	16	NA	-1	NA	-1
ATL2	NW_005081615.1	268354	308799	Nestling Male	AMV	Nestling Male Brain	1131.253598	0.16789331	0.081865373	4.193134239	0.040587993	0.095691509	Not Sig	3182.85905	-0.111283507	0.131534576	0.712600093	0.398581993	0.8236319	Not Sig	40445	NA	NA	5	16	NA	-1	NA	-1
ATP6V1C2	NW_005081582.1	431766	454886	Adult Female	Hyp	Adult Female Brain	151.6544604	-0.983184255	0.196203722	24.65343248	6.86e-07	5.3e-06	Sig	527.4105317	-0.367787722	0.108496836	11.53950892	0.000681326	0.099545365	Not Sig	23120	NA	NA	4	20	62117.3	0.494586551	25769.85	0.038987786
ATP6V1C2	NW_005081582.1	431766	454886	Adult Female	AMV	Adult Female Brain	46.43844516	-2.438338067	0.408492576	32.45085416	1.22e-08	1.04e-07	Sig	155.6777222	-0.799387051	0.202439229	15.65306291	7.61e-05	0.015169193	Sig	23120	NA	NA	4	20	62117.3	0.494586551	25769.85	0.038987786
ATP6V1C2	NW_005081582.1	431766	454886	Adult Male	Heart	Adult Male Horton et al	159.0265596	0.934711559	0.198461964	20.29256307	6.65e-06	2.21e-05	Sig	NA	NA	NA	NA	NA	NA	NA	23120	NA	NA	4	20	62117.3	0.494586551	25769.85	0.038987786
ATP6V1C2	NW_005081582.1	431766	454886	Adult Male	Liver	Adult Male Horton et al	38.37297181	-5.0905801	0.674093566	32.76090791	1.04e-08	6.12e-08	Sig	NA	NA	NA	NA	NA	NA	NA	23120	NA	NA	4	20	62117.3	0.494586551	25769.85	0.038987786
ATP6V1C2	NW_005081582.1	431766	454886	Adult Male	Hyp	Adult Male Brain	95.28119461	-0.811492475	0.149484959	29.05829898	7.02e-08	4.02e-07	Sig	356.6101902	-0.150708338	0.102518156	2.165614098	0.141128234	0.889754356	Not Sig	23120	NA	NA	4	20	62117.3	0.494586551	25769.85	0.038987786
ATP6V1C2	NW_005081582.1	431766	454886	Adult Male	AMV	Adult Male Brain	27.98908705	-1.605862822	0.400078538	14.75589693	0.000122364	0.000403763	Sig	99.70869082	-0.316501486	0.30292312	1.094510658	0.295473949	0.847452175	Not Sig	23120	NA	NA	4	20	62117.3	0.494586551	25769.85	0.038987786
ATP6V1C2	NW_005081582.1	431766	454886	Nestling Female	Hyp	Nestling Female Brain	149.834923	-1.115008966	0.153426328	51.53933539	7.02e-13	8.36e-12	Sig	525.2615733	-0.392057449	0.128894764	9.238227173	0.002370143	0.142541415	Not Sig	23120	NA	NA	4	20	62117.3	0.494586551	25769.85	0.038987786
ATP6V1C2	NW_005081582.1	431766	454886	Nestling Female	AMV	Nestling Female Brain	55.6244487	-2.307891334	0.314186112	50.68509421	1.08e-12	1.68e-11	Sig	183.8285765	-0.569717626	0.213435816	7.144461097	0.007519587	0.83691278	Not Sig	23120	NA	NA	4	20	62117.3	0.494586551	25769.85	0.038987786
ATP6V1C2	NW_005081582.1	431766	454886	Nestling Male	Hyp	Nestling Male Brain	137.5631211	-1.051218946	0.219494932	22.01292068	2.71e-06	2.23e-05	Sig	600.149625	-0.737236013	0.129763266	31.39952052	2.1e-08	4.03e-05	Sig	23120	NA	NA	4	20	62117.3	0.494586551	25769.85	0.038987786
ATP6V1C2	NW_005081582.1	431766	454886	Nestling Male	AMV	Nestling Male Brain	54.30661476	-1.68702763	0.379344815	18.0447265	2.16e-05	0.000144082	Sig	206.1714363	-0.89280198	0.208877286	17.48352638	2.9e-05	0.017821212	Sig	23120	NA	NA	4	20	62117.3	0.494586551	25769.85	0.038987786
B3GALNT2	NW_005081589.1	2839206	2858355	Adult Female	Hyp	Adult Female Brain	683.4835535	0.274386977	0.138181768	3.863106949	0.049358846	0.113266697	Not Sig	NA	NA	NA	NA	NA	NA	NA	19149	NA	1	5	22	112220.5	0.097895967	10586.5	0.40234375
B3GALNT2	NW_005081589.1	2839206	2858355	Adult Female	AMV	Adult Female Brain	762.2144016	0.473471006	0.11592508	16.47130261	4.94e-05	0.000228651	Sig	NA	NA	NA	NA	NA	NA	NA	19149	NA	1	5	22	112220.5	0.097895967	10586.5	0.40234375
B3GALNT2	NW_005081589.1	2839206	2858355	Adult Male	Heart	Adult Male Horton et al	385.0836094	0.305296434	0.041141433	55.01241393	1.2e-13	8.71e-13	Sig	NA	NA	NA	NA	NA	NA	NA	19149	NA	1	5	22	112220.5	0.097895967	10586.5	0.40234375
B3GALNT2	NW_005081589.1	2839206	2858355	Adult Male	Liver	Adult Male Horton et al	248.4626956	0.147010126	0.063181023	5.387521422	0.020281259	0.043942728	Sig	NA	NA	NA	NA	NA	NA	NA	19149	NA	1	5	22	112220.5	0.097895967	10586.5	0.40234375
B3GALNT2	NW_005081589.1	2839206	2858355	Adult Male	Hyp	Adult Male Brain	267.7011782	0.354440376	0.08387711	17.77531033	2.49e-05	9.87e-05	Sig	1009.704276	0.163964739	0.047745254	11.77755545	0.000599492	0.051049873	Not Sig	19149	NA	1	5	22	112220.5	0.097895967	10586.5	0.40234375
B3GALNT2	NW_005081589.1	2839206	2858355	Adult Male	AMV	Adult Male Brain	303.3013107	0.324448756	0.070538478	21.12471561	4.3e-06	1.79e-05	Sig	1135.483666	0.29855792	0.080794736	13.5941773	0.000226888	0.032658081	Sig	19149	NA	1	5	22	112220.5	0.097895967	10586.5	0.40234375
B3GALNT2	NW_005081589.1	2839206	2858355	Nestling Female	Hyp	Nestling Female Brain	360.3366614	0.269113148	0.088502969	9.207799205	0.002409862	0.006581342	Sig	NA	NA	NA	NA	NA	NA	NA	19149	NA	1	5	22	112220.5	0.097895967	10586.5	0.40234375
B3GALNT2	NW_005081589.1	2839206	2858355	Nestling Female	AMV	Nestling Female Brain	428.3248931	0.127028196	0.178885995	0.488983419	0.484381129	0.633798316	Not Sig	NA	NA	NA	NA	NA	NA	NA	19149	NA	1	5	22	112220.5	0.097895967	10586.5	0.40234375
B3GALNT2	NW_005081589.1	2839206	2858355	Nestling Male	Hyp	Nestling Male Brain	432.9050942	0.388548309	0.105968906	13.38041222	0.000254266	0.001323393	Sig	NA	NA	NA	NA	NA	NA	NA	19149	NA	1	5	22	112220.5	0.097895967	10586.5	0.40234375
B3GALNT2	NW_005081589.1	2839206	2858355	Nestling Male	AMV	Nestling Male Brain	377.6380408	0.389317694	0.149754219	6.665606073	0.009829122	0.029402143	Sig	NA	NA	NA	NA	NA	NA	NA	19149	NA	1	5	22	112220.5	0.097895967	10586.5	0.40234375
B3GAT2	NW_005081553.1	142485	161736	Adult Female	Hyp	Adult Female Brain	1892.277609	0.37885088	0.073455029	26.44217793	2.72e-07	2.23e-06	Sig	9107.810283	0.100628177	0.127106063	0.625340333	0.42906968	0.998912819	Not Sig	19251	NA	NA	1	20	101997	0.160627314	3880.935	0.544374564
B3GAT2	NW_005081553.1	142485	161736	Adult Female	AMV	Adult Female Brain	1391.949576	0.699194611	0.075369174	85.28931082	2.58e-20	5.89e-19	Sig	6145.94864	0.109160357	0.158165294	0.47513158	0.490635826	0.967023817	Not Sig	19251	NA	NA	1	20	101997	0.160627314	3880.935	0.544374564
B3GAT2	NW_005081553.1	142485	161736	Adult Male	Heart	Adult Male Horton et al	3.694405519	2.953492526	2.406355948	1.301672417	0.253907963	0.349173908	Not Sig	NA	NA	NA	NA	NA	NA	NA	19251	NA	NA	1	20	101997	0.160627314	3880.935	0.544374564
B3GAT2	NW_005081553.1	142485	161736	Adult Male	Liver	Adult Male Horton et al	2.368156856	0.809985261	1.557518	0.253451681	0.614655061	0.74303795	Not Sig	NA	NA	NA	NA	NA	NA	NA	19251	NA	NA	1	20	101997	0.160627314	3880.935	0.544374564
B3GAT2	NW_005081553.1	142485	161736	Adult Male	Hyp	Adult Male Brain	839.3577967	0.34921758	0.05335077	42.70239781	6.37e-11	4.97e-10	Sig	3560.738416	0.122737052	0.051687879	5.630965493	0.01764591	0.444715851	Not Sig	19251	NA	NA	1	20	101997	0.160627314	3880.935	0.544374564
B3GAT2	NW_005081553.1	142485	161736	Adult Male	AMV	Adult Male Brain	573.9357551	0.652963107	0.058444282	124.4179574	6.82e-29	1.88e-27	Sig	2310.730083	0.355955801	0.114260156	9.643702602	0.001900019	0.133838433	Not Sig	19251	NA	NA	1	20	101997	0.160627314	3880.935	0.544374564
B3GAT2	NW_005081553.1	142485	161736	Nestling Female	Hyp	Nestling Female Brain	2143.86728	0.39637388	0.048134569	67.51843591	2.09e-16	3.8e-15	Sig	10181.42651	0.111004931	0.112521271	0.972975994	0.323939094	0.931102546	Not Sig	19251	NA	NA	1	20	101997	0.160627314	3880.935	0.544374564
B3GAT2	NW_005081553.1	142485	161736	Nestling Female	AMV	Nestling Female Brain	2727.610036	0.452146307	0.051877438	75.61331397	3.45e-18	1.05e-16	Sig	11302.38822	0.337960887	0.155999425	4.658609332	0.030898207	0.996634902	Not Sig	19251	NA	NA	1	20	101997	0.160627314	3880.935	0.544374564
B3GAT2	NW_005081553.1	142485	161736	Nestling Male	Hyp	Nestling Male Brain	2052.003982	0.311061394	0.057278293	29.39631718	5.9e-08	6.38e-07	Sig	10920.64147	-0.01169228	0.138609923	0.007113528	0.932784734	1	Not Sig	19251	NA	NA	1	20	101997	0.160627314	3880.935	0.544374564
B3GAT2	NW_005081553.1	142485	161736	Nestling Male	AMV	Nestling Male Brain	2901.809867	0.452881896	0.071185351	40.19654898	2.3e-10	4.1e-09	Sig	11639.07619	0.434017421	0.163113683	7.179673679	0.007373412	0.447958874	Not Sig	19251	NA	NA	1	20	101997	0.160627314	3880.935	0.544374564
B3GNT2	NW_005081615.1	919392	935164	Adult Female	Hyp	Adult Female Brain	NA	NA	NA	NA	NA	NA	NA	NA	NA	NA	NA	NA	NA	NA	15772	NA	NA	NA	5	NA	-1	NA	-1
B3GNT2	NW_005081615.1	919392	935164	Adult Female	AMV	Adult Female Brain	NA	NA	NA	NA	NA	NA	NA	NA	NA	NA	NA	NA	NA	NA	15772	NA	NA	NA	5	NA	-1	NA	-1
B3GNT2	NW_005081615.1	919392	935164	Adult Male	Heart	Adult Male Horton et al	105.9796328	-0.411669637	0.07606615	29.18727957	6.57e-08	2.81e-07	Sig	NA	NA	NA	NA	NA	NA	NA	15772	NA	NA	NA	5	NA	-1	NA	-1
B3GNT2	NW_005081615.1	919392	935164	Adult Male	Liver	Adult Male Horton et al	147.3624015	-0.0797537	0.09711029	0.665328414	0.414685092	0.55269543	Not Sig	NA	NA	NA	NA	NA	NA	NA	15772	NA	NA	NA	5	NA	-1	NA	-1
B3GNT2	NW_005081615.1	919392	935164	Adult Male	Hyp	Adult Male Brain	NA	NA	NA	NA	NA	NA	NA	NA	NA	NA	NA	NA	NA	NA	15772	NA	NA	NA	5	NA	-1	NA	-1
B3GNT2	NW_005081615.1	919392	935164	Adult Male	AMV	Adult Male Brain	NA	NA	NA	NA	NA	NA	NA	NA	NA	NA	NA	NA	NA	NA	15772	NA	NA	NA	5	NA	-1	NA	-1
B3GNT2	NW_005081615.1	919392	935164	Nestling Female	Hyp	Nestling Female Brain	NA	NA	NA	NA	NA	NA	NA	NA	NA	NA	NA	NA	NA	NA	15772	NA	NA	NA	5	NA	-1	NA	-1
B3GNT2	NW_005081615.1	919392	935164	Nestling Female	AMV	Nestling Female Brain	NA	NA	NA	NA	NA	NA	NA	NA	NA	NA	NA	NA	NA	NA	15772	NA	NA	NA	5	NA	-1	NA	-1
B3GNT2	NW_005081615.1	919392	935164	Nestling Male	Hyp	Nestling Male Brain	NA	NA	NA	NA	NA	NA	NA	NA	NA	NA	NA	NA	NA	NA	15772	NA	NA	NA	5	NA	-1	NA	-1
B3GNT2	NW_005081615.1	919392	935164	Nestling Male	AMV	Nestling Male Brain	NA	NA	NA	NA	NA	NA	NA	NA	NA	NA	NA	NA	NA	NA	15772	NA	NA	NA	5	NA	-1	NA	-1
BABAM2	NW_005081548.1	9488969	9653305	Adult Female	Hyp	Adult Female Brain	2402.232052	-0.089539161	0.069957111	1.631300439	0.201523274	0.350084233	Not Sig	NA	NA	NA	NA	NA	NA	NA	164336	NA	NA	7	9	73401.5	0.62329805	9598.926667	0.681235202
BABAM2	NW_005081548.1	9488969	9653305	Adult Female	AMV	Adult Female Brain	2185.522527	-0.113808117	0.053522278	4.518940643	0.033521581	0.080903772	Not Sig	NA	NA	NA	NA	NA	NA	NA	164336	NA	NA	7	9	73401.5	0.62329805	9598.926667	0.681235202
BABAM2	NW_005081548.1	9488969	9653305	Adult Male	Heart	Adult Male Horton et al	370.9497786	0.312229562	0.047871274	42.4267856	7.34e-11	4.2e-10	Sig	NA	NA	NA	NA	NA	NA	NA	164336	NA	NA	7	9	73401.5	0.62329805	9598.926667	0.681235202
BABAM2	NW_005081548.1	9488969	9653305	Adult Male	Liver	Adult Male Horton et al	242.6462565	-0.217324418	0.072181985	8.992774294	0.002710492	0.007112937	Sig	NA	NA	NA	NA	NA	NA	NA	164336	NA	NA	7	9	73401.5	0.62329805	9598.926667	0.681235202
BABAM2	NW_005081548.1	9488969	9653305	Adult Male	Hyp	Adult Male Brain	1408.981	-0.161538836	0.032810566	24.23139044	8.54e-07	4.18e-06	Sig	4360.280409	-0.010111138	0.035745715	0.080062059	0.777213328	0.989305346	Not Sig	164336	NA	NA	7	9	73401.5	0.62329805	9598.926667	0.681235202
BABAM2	NW_005081548.1	9488969	9653305	Adult Male	AMV	Adult Male Brain	1125.168589	-0.184420182	0.043858103	17.65703273	2.65e-05	9.95e-05	Sig	3547.837635	-0.098951923	0.057039716	3.012932255	0.082602739	0.671009128	Not Sig	164336	NA	NA	7	9	73401.5	0.62329805	9598.926667	0.681235202
BABAM2	NW_005081548.1	9488969	9653305	Nestling Female	Hyp	Nestling Female Brain	2196.273116	0.005848418	0.043438794	0.018101254	0.892974871	0.918665616	Not Sig	NA	NA	NA	NA	NA	NA	NA	164336	NA	NA	7	9	73401.5	0.62329805	9598.926667	0.681235202
BABAM2	NW_005081548.1	9488969	9653305	Nestling Female	AMV	Nestling Female Brain	1747.248989	0.010567744	0.083850621	0.015777654	0.900041334	0.943812341	Not Sig	NA	NA	NA	NA	NA	NA	NA	164336	NA	NA	7	9	73401.5	0.62329805	9598.926667	0.681235202
BABAM2	NW_005081548.1	9488969	9653305	Nestling Male	Hyp	Nestling Male Brain	2227.865093	0.010153181	0.050912302	0.039731316	0.842006837	0.914824526	Not Sig	NA	NA	NA	NA	NA	NA	NA	164336	NA	NA	7	9	73401.5	0.62329805	9598.926667	0.681235202
BABAM2	NW_005081548.1	9488969	9653305	Nestling Male	AMV	Nestling Male Brain	2182.972346	-0.039818122	0.090555397	0.191971132	0.6612811	0.798630034	Not Sig	NA	NA	NA	NA	NA	NA	NA	164336	NA	NA	7	9	73401.5	0.62329805	9598.926667	0.681235202
BACH2	NW_005081553.1	4676987	4817522	Adult Female	Hyp	Adult Female Brain	389.5792432	-0.026994635	0.128734667	0.043752659	0.834314466	0.913422874	Not Sig	1833.252766	0.050157001	0.107135955	0.219003792	0.639800029	0.998912819	Not Sig	140535	NA	1	1	31	84244.875	0.444890902	4348.61125	0.471872816
BACH2	NW_005081553.1	4676987	4817522	Adult Female	AMV	Adult Female Brain	559.054786	-0.128923113	0.102446944	1.581345284	0.208567023	0.358401572	Not Sig	2547.886435	0.153683781	0.123244238	1.549206407	0.213252635	0.872137514	Not Sig	140535	NA	1	1	31	84244.875	0.444890902	4348.61125	0.471872816
BACH2	NW_005081553.1	4676987	4817522	Adult Male	Heart	Adult Male Horton et al	63.40420722	0.233464908	0.092966593	6.276710855	0.012233495	0.024438738	Sig	NA	NA	NA	NA	NA	NA	NA	140535	NA	1	1	31	84244.875	0.444890902	4348.61125	0.471872816
BACH2	NW_005081553.1	4676987	4817522	Adult Male	Liver	Adult Male Horton et al	39.70937124	0.666144683	0.139855212	22.35978927	2.26e-06	1.03e-05	Sig	NA	NA	NA	NA	NA	NA	NA	140535	NA	1	1	31	84244.875	0.444890902	4348.61125	0.471872816
BACH2	NW_005081553.1	4676987	4817522	Adult Male	Hyp	Adult Male Brain	56.11945922	-0.087312547	0.18072149	0.229636159	0.631793742	0.752747025	Not Sig	763.2521584	0.065917795	0.065210493	1.021077251	0.312263618	0.96020163	Not Sig	140535	NA	1	1	31	84244.875	0.444890902	4348.61125	0.471872816
BACH2	NW_005081553.1	4676987	4817522	Adult Male	AMV	Adult Male Brain	77.51874087	-0.319387029	0.136533536	5.444364726	0.019631553	0.040905587	Sig	1033.67668	-0.303909579	0.156872004	3.759390399	0.05251172	0.602919369	Not Sig	140535	NA	1	1	31	84244.875	0.444890902	4348.61125	0.471872816
BACH2	NW_005081553.1	4676987	4817522	Nestling Female	Hyp	Nestling Female Brain	502.2236869	0.064576888	0.068212034	0.895170997	0.344079853	0.465810454	Not Sig	2496.528815	0.047287459	0.088969455	0.282466673	0.595089011	0.98605262	Not Sig	140535	NA	1	1	31	84244.875	0.444890902	4348.61125	0.471872816
BACH2	NW_005081553.1	4676987	4817522	Nestling Female	AMV	Nestling Female Brain	924.1159461	-0.240910506	0.115441241	4.30322746	0.038040117	0.084488244	Not Sig	4725.205575	-0.079319379	0.179476885	0.195523137	0.65835897	0.996634902	Not Sig	140535	NA	1	1	31	84244.875	0.444890902	4348.61125	0.471872816
BACH2	NW_005081553.1	4676987	4817522	Nestling Male	Hyp	Nestling Male Brain	562.2992068	0.052825933	0.097448618	0.29287392	0.588384714	0.765704346	Not Sig	2845.45236	0.036688208	0.12157265	0.091192784	0.762666219	1	Not Sig	140535	NA	1	1	31	84244.875	0.444890902	4348.61125	0.471872816
BACH2	NW_005081553.1	4676987	4817522	Nestling Male	AMV	Nestling Male Brain	906.4828854	-0.045587837	0.09021167	0.254554505	0.613886212	0.770148157	Not Sig	4838.862477	-0.457551622	0.405697342	1.243733855	0.264752661	0.758573518	Not Sig	140535	NA	1	1	31	84244.875	0.444890902	4348.61125	0.471872816
BAG2	NW_005081569.1	4770633	4776412	Adult Female	Hyp	Adult Female Brain	453.7032453	0.267306235	0.134917981	3.881780783	0.048812757	0.112258661	Not Sig	1068.581642	0.157693246	0.161812154	0.946501428	0.33061143	0.998912819	Not Sig	5779	NA	NA	2	22	80219.7	0.482758621	2774.51	0.767295597
BAG2	NW_005081569.1	4770633	4776412	Adult Female	AMV	Adult Female Brain	220.2201893	0.77542755	0.169861083	20.55443354	5.8e-06	3.2e-05	Sig	419.8779069	0.448280538	0.216698202	4.230838077	0.039695835	0.581979001	Not Sig	5779	NA	NA	2	22	80219.7	0.482758621	2774.51	0.767295597
BAG2	NW_005081569.1	4770633	4776412	Adult Male	Heart	Adult Male Horton et al	70.51054563	0.638827298	0.09076662	49.43514412	2.05e-12	1.36e-11	Sig	NA	NA	NA	NA	NA	NA	NA	5779	NA	NA	2	22	80219.7	0.482758621	2774.51	0.767295597
BAG2	NW_005081569.1	4770633	4776412	Adult Male	Liver	Adult Male Horton et al	4.197190721	1.32307354	1.508238972	0.505731532	0.476992505	0.614418699	Not Sig	NA	NA	NA	NA	NA	NA	NA	5779	NA	NA	2	22	80219.7	0.482758621	2774.51	0.767295597
BAG2	NW_005081569.1	4770633	4776412	Adult Male	Hyp	Adult Male Brain	276.4746638	0.647219907	0.086991295	54.98494525	1.21e-13	1.22e-12	Sig	682.5440522	0.432987344	0.183849338	5.499601094	0.019020812	0.462080504	Not Sig	5779	NA	NA	2	22	80219.7	0.482758621	2774.51	0.767295597
BAG2	NW_005081569.1	4770633	4776412	Adult Male	AMV	Adult Male Brain	97.15411348	0.893977499	0.147904398	35.93763322	2.04e-09	1.35e-08	Sig	251.9515339	0.281907606	0.113161804	6.181235475	0.012911209	0.39593448	Not Sig	5779	NA	NA	2	22	80219.7	0.482758621	2774.51	0.767295597
BAG2	NW_005081569.1	4770633	4776412	Nestling Female	Hyp	Nestling Female Brain	419.0715406	0.383112056	0.094792309	16.18790269	5.74e-05	0.000227028	Sig	931.8398692	0.338653441	0.124411467	7.395241315	0.006539665	0.23929887	Not Sig	5779	NA	NA	2	22	80219.7	0.482758621	2774.51	0.767295597
BAG2	NW_005081569.1	4770633	4776412	Nestling Female	AMV	Nestling Female Brain	253.7218397	0.38569419	0.166389435	5.267940976	0.021721691	0.052731156	Not Sig	484.6213006	0.748867733	0.208072571	12.68059486	0.00036947	0.112226515	Not Sig	5779	NA	NA	2	22	80219.7	0.482758621	2774.51	0.767295597
BAG2	NW_005081569.1	4770633	4776412	Nestling Male	Hyp	Nestling Male Brain	392.9009216	0.439226967	0.115822405	14.28085599	0.000157458	0.000856228	Sig	962.2242684	0.219885628	0.148555202	2.201908121	0.13784002	0.960841766	Not Sig	5779	NA	NA	2	22	80219.7	0.482758621	2774.51	0.767295597
BAG2	NW_005081569.1	4770633	4776412	Nestling Male	AMV	Nestling Male Brain	260.9923831	0.515200988	0.161106418	10.08920969	0.001491401	0.005976373	Sig	491.357984	0.591123655	0.238891869	6.225393687	0.012593091	0.48463232	Not Sig	5779	NA	NA	2	22	80219.7	0.482758621	2774.51	0.767295597
BATF3	NW_005081548.1	3614146	3623235	Adult Female	Hyp	Adult Female Brain	NA	NA	NA	NA	NA	NA	NA	82.75075155	-1.114495772	0.555228256	4.023125401	0.044880471	0.799734181	Not Sig	9089	NA	NA	NA	11	109781	0.103740503	26928.6	0.107848233
BATF3	NW_005081548.1	3614146	3623235	Adult Female	AMV	Adult Female Brain	NA	NA	NA	NA	NA	NA	NA	95.84054855	-0.518670971	0.464320767	1.256472875	0.262319785	0.904815084	Not Sig	9089	NA	NA	NA	11	109781	0.103740503	26928.6	0.107848233
BATF3	NW_005081548.1	3614146	3623235	Adult Male	Heart	Adult Male Horton et al	7.730465347	0.229409051	0.452443661	0.252017504	0.61565806	0.708170508	Not Sig	NA	NA	NA	NA	NA	NA	NA	9089	NA	NA	NA	11	109781	0.103740503	26928.6	0.107848233
BATF3	NW_005081548.1	3614146	3623235	Adult Male	Liver	Adult Male Horton et al	101.979537	-0.694048181	0.118501734	33.62256486	6.69e-09	4.04e-08	Sig	NA	NA	NA	NA	NA	NA	NA	9089	NA	NA	NA	11	109781	0.103740503	26928.6	0.107848233
BATF3	NW_005081548.1	3614146	3623235	Adult Male	Hyp	Adult Male Brain	11.62814621	-0.362460154	0.367897103	0.959080954	0.327418539	0.466095133	Not Sig	31.42006396	-0.084689523	0.276278322	0.094221353	0.758877648	0.989305346	Not Sig	9089	NA	NA	NA	11	109781	0.103740503	26928.6	0.107848233
BATF3	NW_005081548.1	3614146	3623235	Adult Male	AMV	Adult Male Brain	13.12077443	-0.301221112	0.386366984	0.570849826	0.449921416	0.600277807	Not Sig	43.15994594	-0.172416341	0.176772711	0.95150734	0.329335914	0.870116954	Not Sig	9089	NA	NA	NA	11	109781	0.103740503	26928.6	0.107848233
BATF3	NW_005081548.1	3614146	3623235	Nestling Female	Hyp	Nestling Female Brain	NA	NA	NA	NA	NA	NA	NA	48.04460154	-0.256095759	0.233604605	1.201237376	0.273074507	0.906442046	Not Sig	9089	NA	NA	NA	11	109781	0.103740503	26928.6	0.107848233
BATF3	NW_005081548.1	3614146	3623235	Nestling Female	AMV	Nestling Female Brain	NA	NA	NA	NA	NA	NA	NA	38.05710931	0.462977242	0.330771915	1.955351545	0.162011336	0.996634902	Not Sig	9089	NA	NA	NA	11	109781	0.103740503	26928.6	0.107848233
BATF3	NW_005081548.1	3614146	3623235	Nestling Male	Hyp	Nestling Male Brain	NA	NA	NA	NA	NA	NA	NA	76.99836516	0.080456772	0.278682129	0.083578498	0.772505267	1	Not Sig	9089	NA	NA	NA	11	109781	0.103740503	26928.6	0.107848233
BATF3	NW_005081548.1	3614146	3623235	Nestling Male	AMV	Nestling Male Brain	NA	NA	NA	NA	NA	NA	NA	46.86461237	0.43974501	0.458891837	0.928181198	0.335335986	0.796084296	Not Sig	9089	NA	NA	NA	11	109781	0.103740503	26928.6	0.107848233
BCKDHB	NW_005081569.1	1345044	1455354	Adult Female	Hyp	Adult Female Brain	168.8018798	-0.959918438	0.195386249	23.62255768	1.17e-06	8.38e-06	Sig	4149.899404	-0.213618326	0.08385608	6.512003339	0.010714873	0.47667447	Not Sig	110310	NA	NA	1	19	67342.6	0.731703357	4945.69	0.370719776
BCKDHB	NW_005081569.1	1345044	1455354	Adult Female	AMV	Adult Female Brain	218.3996772	-0.719456476	0.17870488	15.93993943	6.54e-05	0.000296299	Sig	4573.401016	-0.097527947	0.062672383	2.42587147	0.119346854	0.782617369	Not Sig	110310	NA	NA	1	19	67342.6	0.731703357	4945.69	0.370719776
BCKDHB	NW_005081569.1	1345044	1455354	Adult Male	Heart	Adult Male Horton et al	219.8035514	-0.271010632	0.084868165	10.06322666	0.001512581	0.003594457	Sig	NA	NA	NA	NA	NA	NA	NA	110310	NA	NA	1	19	67342.6	0.731703357	4945.69	0.370719776
BCKDHB	NW_005081569.1	1345044	1455354	Adult Male	Liver	Adult Male Horton et al	111.6270271	-0.471885607	0.103925556	20.30696499	6.6e-06	2.84e-05	Sig	NA	NA	NA	NA	NA	NA	NA	110310	NA	NA	1	19	67342.6	0.731703357	4945.69	0.370719776
BCKDHB	NW_005081569.1	1345044	1455354	Adult Male	Hyp	Adult Male Brain	110.6230785	-0.456197453	0.118649973	14.70578382	0.00012566	0.000457421	Sig	2370.992307	-0.064479677	0.042370323	2.31702336	0.127964692	0.872764365	Not Sig	110310	NA	NA	1	19	67342.6	0.731703357	4945.69	0.370719776
BCKDHB	NW_005081569.1	1345044	1455354	Adult Male	AMV	Adult Male Brain	139.5267509	-0.444198155	0.098527123	20.2934091	6.64e-06	2.68e-05	Sig	2606.82087	0.015381174	0.070805965	0.047260745	0.827900243	0.979271722	Not Sig	110310	NA	NA	1	19	67342.6	0.731703357	4945.69	0.370719776
BCKDHB	NW_005081569.1	1345044	1455354	Nestling Female	Hyp	Nestling Female Brain	102.0386728	-1.008955594	0.198005681	25.02980703	5.65e-07	3.22e-06	Sig	2849.203586	-0.22078623	0.059338573	13.82947942	0.000200171	0.034165341	Sig	110310	NA	NA	1	19	67342.6	0.731703357	4945.69	0.370719776
BCKDHB	NW_005081569.1	1345044	1455354	Nestling Female	AMV	Nestling Female Brain	80.75325547	-1.143059068	0.226738849	24.85194717	6.19e-07	4.36e-06	Sig	2103.687073	-0.024019075	0.126607577	0.036006172	0.849502746	0.996634902	Not Sig	110310	NA	NA	1	19	67342.6	0.731703357	4945.69	0.370719776
BCKDHB	NW_005081569.1	1345044	1455354	Nestling Male	Hyp	Nestling Male Brain	125.9232226	-0.669868254	0.22283946	8.751082359	0.003094184	0.011425482	Sig	3116.913982	-0.082363389	0.08949475	0.844927296	0.357991354	0.995064234	Not Sig	110310	NA	NA	1	19	67342.6	0.731703357	4945.69	0.370719776
BCKDHB	NW_005081569.1	1345044	1455354	Nestling Male	AMV	Nestling Male Brain	75.56231277	-1.289627117	0.332553621	13.92663455	0.000190086	0.000969156	Sig	2313.800787	0.042181614	0.140823596	0.089866497	0.764346946	0.948560474	Not Sig	110310	NA	NA	1	19	67342.6	0.731703357	4945.69	0.370719776
BCL11A	NW_005081577.1	3506110	3573301	Adult Female	Hyp	Adult Female Brain	384.8933604	-0.18598126	0.121115072	2.351481091	0.125164039	0.240050009	Not Sig	1896.223908	-0.042930529	0.106272002	0.163319101	0.686118905	0.998912819	Not Sig	67191	NA	NA	NA	25	97891.975	0.214348334	9421.135	0.724020054
BCL11A	NW_005081577.1	3506110	3573301	Adult Female	AMV	Adult Female Brain	617.721187	0.029264553	0.097620505	0.08976271	0.764479037	0.859738729	Not Sig	2336.328727	0.413235157	0.159925489	6.599647586	0.010199895	0.333602308	Not Sig	67191	NA	NA	NA	25	97891.975	0.214348334	9421.135	0.724020054
BCL11A	NW_005081577.1	3506110	3573301	Adult Male	Heart	Adult Male Horton et al	4.396300612	-2.475695494	0.956046184	4.332540519	0.037390399	0.066685969	Not Sig	NA	NA	NA	NA	NA	NA	NA	67191	NA	NA	NA	25	97891.975	0.214348334	9421.135	0.724020054
BCL11A	NW_005081577.1	3506110	3573301	Adult Male	Liver	Adult Male Horton et al	0.413780349	-0.560934884	2.951287324	0.057117483	0.811111289	100	Not Sig	NA	NA	NA	NA	NA	NA	NA	67191	NA	NA	NA	25	97891.975	0.214348334	9421.135	0.724020054
BCL11A	NW_005081577.1	3506110	3573301	Adult Male	Hyp	Adult Male Brain	119.9607474	-0.220304423	0.119165784	3.396069476	0.06535197	0.121252685	Not Sig	521.731503	-0.29734324	0.132005936	5.082933773	0.024162452	0.505170636	Not Sig	67191	NA	NA	NA	25	97891.975	0.214348334	9421.135	0.724020054
BCL11A	NW_005081577.1	3506110	3573301	Adult Male	AMV	Adult Male Brain	127.8752147	0.141182319	0.114101329	1.521950264	0.217324599	0.331372493	Not Sig	590.7712065	-0.375297026	0.194190429	3.740769682	0.05309998	0.602919369	Not Sig	67191	NA	NA	NA	25	97891.975	0.214348334	9421.135	0.724020054
BCL11A	NW_005081577.1	3506110	3573301	Nestling Female	Hyp	Nestling Female Brain	549.7995343	-0.109092718	0.064023043	2.901227656	0.088512118	0.154005145	Not Sig	2779.32306	0.01918646	0.105055746	0.033367771	0.855058155	0.996728869	Not Sig	67191	NA	NA	NA	25	97891.975	0.214348334	9421.135	0.724020054
BCL11A	NW_005081577.1	3506110	3573301	Nestling Female	AMV	Nestling Female Brain	1013.014511	-0.069819014	0.105618382	0.432705991	0.510664138	0.658176196	Not Sig	4220.899867	0.002807674	0.319193204	7.74e-05	0.992979991	0.997621555	Not Sig	67191	NA	NA	NA	25	97891.975	0.214348334	9421.135	0.724020054
BCL11A	NW_005081577.1	3506110	3573301	Nestling Male	Hyp	Nestling Male Brain	487.2326366	-0.112928714	0.09184445	1.510707105	0.21903122	0.38990411	Not Sig	2781.602308	-0.115398937	0.142366164	0.65476864	0.418412908	0.995064234	Not Sig	67191	NA	NA	NA	25	97891.975	0.214348334	9421.135	0.724020054
BCL11A	NW_005081577.1	3506110	3573301	Nestling Male	AMV	Nestling Male Brain	1011.972091	-0.027851325	0.073529801	0.143308467	0.705013852	0.824480783	Not Sig	4631.609846	-0.009245025	0.249622704	0.001371257	0.970460699	0.999287016	Not Sig	67191	NA	NA	NA	25	97891.975	0.214348334	9421.135	0.724020054
BCL2L11	NW_005081577.1	1337414	1347610	Adult Female	Hyp	Adult Female Brain	117.8190424	-0.469471138	0.227894489	4.177581524	0.040962114	0.097113468	Not Sig	613.1348641	-0.207322836	0.125610566	2.732094232	0.098350243	0.94762906	Not Sig	10196	NA	NA	NA	20	107692.5	0.116208845	7626.68	0.447078093
BCL2L11	NW_005081577.1	1337414	1347610	Adult Female	AMV	Adult Female Brain	117.3515114	0.355871335	0.224966239	2.479743473	0.11532106	0.226012443	Not Sig	576.592447	-0.10319654	0.228646441	0.204047972	0.65147309	0.990552154	Not Sig	10196	NA	NA	NA	20	107692.5	0.116208845	7626.68	0.447078093
BCL2L11	NW_005081577.1	1337414	1347610	Adult Male	Heart	Adult Male Horton et al	33.09503594	0.211768012	0.154487339	1.838800007	0.175091659	0.254545017	Not Sig	NA	NA	NA	NA	NA	NA	NA	10196	NA	NA	NA	20	107692.5	0.116208845	7626.68	0.447078093
BCL2L11	NW_005081577.1	1337414	1347610	Adult Male	Liver	Adult Male Horton et al	30.68283569	-0.179119753	0.177497888	0.98689551	0.320502325	0.449874525	Not Sig	NA	NA	NA	NA	NA	NA	NA	10196	NA	NA	NA	20	107692.5	0.116208845	7626.68	0.447078093
BCL2L11	NW_005081577.1	1337414	1347610	Adult Male	Hyp	Adult Male Brain	47.40601535	-0.273695546	0.1744149	2.446265273	0.117804861	0.201186223	Not Sig	249.6654296	-0.162533162	0.099670414	2.660590228	0.102862559	0.833784337	Not Sig	10196	NA	NA	NA	20	107692.5	0.116208845	7626.68	0.447078093
BCL2L11	NW_005081577.1	1337414	1347610	Adult Male	AMV	Adult Male Brain	32.39134182	-0.111340186	0.220553442	0.25079656	0.616514753	0.753357981	Not Sig	169.434546	-0.0661101	0.089957022	0.5442168	0.460690383	0.913748969	Not Sig	10196	NA	NA	NA	20	107692.5	0.116208845	7626.68	0.447078093
BCL2L11	NW_005081577.1	1337414	1347610	Nestling Female	Hyp	Nestling Female Brain	151.4930612	-0.022514373	0.130758458	0.029497835	0.863634596	0.898283928	Not Sig	733.0974423	0.236004503	0.102899903	5.254451236	0.021890703	0.414720254	Not Sig	10196	NA	NA	NA	20	107692.5	0.116208845	7626.68	0.447078093
BCL2L11	NW_005081577.1	1337414	1347610	Nestling Female	AMV	Nestling Female Brain	337.3757802	0.392772199	0.151487903	6.604350773	0.010172989	0.027708009	Sig	1368.541803	0.181504623	0.309612673	0.342561219	0.558354555	0.996634902	Not Sig	10196	NA	NA	NA	20	107692.5	0.116208845	7626.68	0.447078093
BCL2L11	NW_005081577.1	1337414	1347610	Nestling Male	Hyp	Nestling Male Brain	147.4248811	-0.010535722	0.193509727	0.002907513	0.956997819	0.989302046	Not Sig	802.3706536	0.003952544	0.109870557	0.001350048	0.970689922	1	Not Sig	10196	NA	NA	NA	20	107692.5	0.116208845	7626.68	0.447078093
BCL2L11	NW_005081577.1	1337414	1347610	Nestling Male	AMV	Nestling Male Brain	306.8565225	-0.049625392	0.212309996	0.052892194	0.818104957	0.899828513	Not Sig	1674.19521	-0.157904158	0.288677993	0.29717391	0.585659574	0.892939587	Not Sig	10196	NA	NA	NA	20	107692.5	0.116208845	7626.68	0.447078093
BCLAF1	NW_005081611.1	2292945	2318382	Adult Female	Hyp	Adult Female Brain	NA	NA	NA	NA	NA	NA	NA	NA	NA	NA	NA	NA	NA	NA	25437	NA	NA	1	19	92758.4	0.264562634	19187.1	0.302494803
BCLAF1	NW_005081611.1	2292945	2318382	Adult Female	AMV	Adult Female Brain	NA	NA	NA	NA	NA	NA	NA	NA	NA	NA	NA	NA	NA	NA	25437	NA	NA	1	19	92758.4	0.264562634	19187.1	0.302494803
BCLAF1	NW_005081611.1	2292945	2318382	Adult Male	Heart	Adult Male Horton et al	204.6955163	0.032322176	0.054581844	0.349884852	0.55417832	0.660281332	Not Sig	NA	NA	NA	NA	NA	NA	NA	25437	NA	NA	1	19	92758.4	0.264562634	19187.1	0.302494803
BCLAF1	NW_005081611.1	2292945	2318382	Adult Male	Liver	Adult Male Horton et al	202.4967942	0.047046017	0.070202376	0.446570404	0.503968131	0.64171621	Not Sig	NA	NA	NA	NA	NA	NA	NA	25437	NA	NA	1	19	92758.4	0.264562634	19187.1	0.302494803
BCLAF1	NW_005081611.1	2292945	2318382	Adult Male	Hyp	Adult Male Brain	404.0968185	0.120427546	0.062534399	3.702069534	0.054345023	0.104136546	Not Sig	3780.210771	-0.028279093	0.057072345	0.24563268	0.62016717	0.981669138	Not Sig	25437	NA	NA	1	19	92758.4	0.264562634	19187.1	0.302494803
BCLAF1	NW_005081611.1	2292945	2318382	Adult Male	AMV	Adult Male Brain	309.7310195	-0.03635047	0.072481153	0.250974146	0.616389985	0.753357981	Not Sig	3205.846669	-0.129769021	0.054822969	5.608097772	0.01787766	0.446969032	Not Sig	25437	NA	NA	1	19	92758.4	0.264562634	19187.1	0.302494803
BCLAF1	NW_005081611.1	2292945	2318382	Nestling Female	Hyp	Nestling Female Brain	NA	NA	NA	NA	NA	NA	NA	NA	NA	NA	NA	NA	NA	NA	25437	NA	NA	1	19	92758.4	0.264562634	19187.1	0.302494803
BCLAF1	NW_005081611.1	2292945	2318382	Nestling Female	AMV	Nestling Female Brain	NA	NA	NA	NA	NA	NA	NA	NA	NA	NA	NA	NA	NA	NA	25437	NA	NA	1	19	92758.4	0.264562634	19187.1	0.302494803
BCLAF1	NW_005081611.1	2292945	2318382	Nestling Male	Hyp	Nestling Male Brain	NA	NA	NA	NA	NA	NA	NA	NA	NA	NA	NA	NA	NA	NA	25437	NA	NA	1	19	92758.4	0.264562634	19187.1	0.302494803
BCLAF1	NW_005081611.1	2292945	2318382	Nestling Male	AMV	Nestling Male Brain	NA	NA	NA	NA	NA	NA	NA	NA	NA	NA	NA	NA	NA	NA	25437	NA	NA	1	19	92758.4	0.264562634	19187.1	0.302494803
BEND3	NW_005081561.1	2539655	2559822	Adult Female	Hyp	Adult Female Brain	285.7005657	0.056167699	0.158126966	0.124845858	0.723837059	0.861554642	Not Sig	NA	NA	NA	NA	NA	NA	NA	20167	NA	NA	3	5	142051.5	0.01811806	18391.55	0.152577638
BEND3	NW_005081561.1	2539655	2559822	Adult Female	AMV	Adult Female Brain	282.681455	0.029470104	0.140029913	0.044225839	0.833434	0.901761136	Not Sig	NA	NA	NA	NA	NA	NA	NA	20167	NA	NA	3	5	142051.5	0.01811806	18391.55	0.152577638
BEND3	NW_005081561.1	2539655	2559822	Adult Male	Heart	Adult Male Horton et al	578.992001	0.085051559	0.042292011	4.035194614	0.044560536	0.078026039	Not Sig	NA	NA	NA	NA	NA	NA	NA	20167	NA	NA	3	5	142051.5	0.01811806	18391.55	0.152577638
BEND3	NW_005081561.1	2539655	2559822	Adult Male	Liver	Adult Male Horton et al	326.525299	-0.591325589	0.066576652	78.10580041	9.77e-19	1.31e-17	Sig	NA	NA	NA	NA	NA	NA	NA	20167	NA	NA	3	5	142051.5	0.01811806	18391.55	0.152577638
BEND3	NW_005081561.1	2539655	2559822	Adult Male	Hyp	Adult Male Brain	132.9038507	-0.22341482	0.115310281	3.727798993	0.053513866	0.103038007	Not Sig	NA	NA	NA	NA	NA	NA	NA	20167	NA	NA	3	5	142051.5	0.01811806	18391.55	0.152577638
BEND3	NW_005081561.1	2539655	2559822	Adult Male	AMV	Adult Male Brain	141.7556595	-0.066420131	0.094270599	0.495610143	0.481435364	0.6302289	Not Sig	NA	NA	NA	NA	NA	NA	NA	20167	NA	NA	3	5	142051.5	0.01811806	18391.55	0.152577638
BEND3	NW_005081561.1	2539655	2559822	Nestling Female	Hyp	Nestling Female Brain	315.9697976	0.193759748	0.085769481	5.092413271	0.024030729	0.051170155	Not Sig	NA	NA	NA	NA	NA	NA	NA	20167	NA	NA	3	5	142051.5	0.01811806	18391.55	0.152577638
BEND3	NW_005081561.1	2539655	2559822	Nestling Female	AMV	Nestling Female Brain	348.5192096	-0.126917178	0.125148009	1.020713304	0.312349871	0.465824376	Not Sig	NA	NA	NA	NA	NA	NA	NA	20167	NA	NA	3	5	142051.5	0.01811806	18391.55	0.152577638
BEND3	NW_005081561.1	2539655	2559822	Nestling Male	Hyp	Nestling Male Brain	350.5124575	0.284133405	0.133532464	4.480228282	0.034289141	0.086156393	Not Sig	NA	NA	NA	NA	NA	NA	NA	20167	NA	NA	3	5	142051.5	0.01811806	18391.55	0.152577638
BEND3	NW_005081561.1	2539655	2559822	Nestling Male	AMV	Nestling Male Brain	448.288205	-0.064881332	0.139905818	0.212736897	0.644630657	0.792998775	Not Sig	NA	NA	NA	NA	NA	NA	NA	20167	NA	NA	3	5	142051.5	0.01811806	18391.55	0.152577638
BEND6	NW_005081569.1	4823934	4846725	Adult Female	Hyp	Adult Female Brain	506.2591185	-0.178141019	0.105396722	2.850861641	0.091324979	0.187432831	Not Sig	1769.632153	-0.351065184	0.207922797	2.864864004	0.090533362	0.943411049	Not Sig	22791	NA	1	NA	15	82963.4	0.428307033	5489.055	0.255066387
BEND6	NW_005081569.1	4823934	4846725	Adult Female	AMV	Adult Female Brain	585.7077164	-0.350866522	0.101344436	11.94894909	0.000546782	0.002053301	Sig	1912.877064	-0.256805185	0.145611158	3.121819608	0.077250476	0.702660407	Not Sig	22791	NA	1	NA	15	82963.4	0.428307033	5489.055	0.255066387
BEND6	NW_005081569.1	4823934	4846725	Adult Male	Heart	Adult Male Horton et al	8.371038937	-4.480353741	0.69242677	29.97962365	4.37e-08	1.9e-07	Sig	NA	NA	NA	NA	NA	NA	NA	22791	NA	1	NA	15	82963.4	0.428307033	5489.055	0.255066387
BEND6	NW_005081569.1	4823934	4846725	Adult Male	Liver	Adult Male Horton et al	0.191415126	0.000522999	2.954610754	7.42e-08	0.99978262	100	Not Sig	NA	NA	NA	NA	NA	NA	NA	22791	NA	1	NA	15	82963.4	0.428307033	5489.055	0.255066387
BEND6	NW_005081569.1	4823934	4846725	Adult Male	Hyp	Adult Male Brain	240.1942368	-0.07910208	0.087887587	0.806498918	0.369157375	0.510991525	Not Sig	870.6253456	-0.576305311	0.109966262	27.48432781	1.58e-07	4.34e-05	Sig	22791	NA	1	NA	15	82963.4	0.428307033	5489.055	0.255066387
BEND6	NW_005081569.1	4823934	4846725	Adult Male	AMV	Adult Male Brain	264.6726193	-0.403294957	0.097764801	16.87109411	4e-05	0.000145807	Sig	1018.166002	-0.687080938	0.130888825	27.53628386	1.54e-07	6.65e-05	Sig	22791	NA	1	NA	15	82963.4	0.428307033	5489.055	0.255066387
BEND6	NW_005081569.1	4823934	4846725	Nestling Female	Hyp	Nestling Female Brain	380.0649746	-0.135402821	0.096146898	1.969894247	0.160459088	0.255208702	Not Sig	1353.966394	-0.628236311	0.138138541	20.52574722	5.88e-06	0.002519722	Sig	22791	NA	1	NA	15	82963.4	0.428307033	5489.055	0.255066387
BEND6	NW_005081569.1	4823934	4846725	Nestling Female	AMV	Nestling Female Brain	434.4401401	0.04107292	0.105291094	0.15146075	0.697143304	0.808905067	Not Sig	1434.398517	-0.193361332	0.160966015	1.445709082	0.229217717	0.996634902	Not Sig	22791	NA	1	NA	15	82963.4	0.428307033	5489.055	0.255066387
BEND6	NW_005081569.1	4823934	4846725	Nestling Male	Hyp	Nestling Male Brain	414.8674029	-0.269336325	0.133782228	3.997408619	0.045570276	0.108514841	Not Sig	1623.382652	-0.594495136	0.11923484	24.306112	8.22e-07	0.000971469	Sig	22791	NA	1	NA	15	82963.4	0.428307033	5489.055	0.255066387
BEND6	NW_005081569.1	4823934	4846725	Nestling Male	AMV	Nestling Male Brain	466.2299361	-0.176031199	0.121851209	2.073734265	0.14985421	0.280976644	Not Sig	1477.105555	-0.343564478	0.143801651	5.617330808	0.017783713	0.496865707	Not Sig	22791	NA	1	NA	15	82963.4	0.428307033	5489.055	0.255066387
BFSP1	NW_005081883.1	131677	149513	Adult Female	Hyp	Adult Female Brain	13.97309458	1.711185658	0.781201069	3.951761162	0.04682234	0.108631964	Not Sig	39.97746609	1.114640754	0.677430339	2.599420335	0.106902809	0.967040684	Not Sig	17836	NA	1	1	6	NA	-1	NA	-1
BFSP1	NW_005081883.1	131677	149513	Adult Female	AMV	Adult Female Brain	5.543042819	-0.859435761	1.25915048	0.259021462	0.610793222	0.747892653	Not Sig	36.36538406	-0.983122722	0.688913442	2.041454802	0.153063198	0.830723988	Not Sig	17836	NA	1	1	6	NA	-1	NA	-1
BFSP1	NW_005081883.1	131677	149513	Adult Male	Heart	Adult Male Horton et al	0.288013821	-0.167118859	2.956977048	0.005693001	0.939855107	100	Not Sig	NA	NA	NA	NA	NA	NA	NA	17836	NA	1	1	6	NA	-1	NA	-1
BFSP1	NW_005081883.1	131677	149513	Adult Male	Liver	Adult Male Horton et al	1.616648474	1.07155637	2.943678986	0.182593804	0.669153577	100	Not Sig	NA	NA	NA	NA	NA	NA	NA	17836	NA	1	1	6	NA	-1	NA	-1
BFSP1	NW_005081883.1	131677	149513	Adult Male	Hyp	Adult Male Brain	3.952205317	2.656290922	1.244797907	2.101489485	0.147155726	0.244562122	Not Sig	19.57191797	0.704247802	0.46851936	2.226613429	0.135650886	0.878760416	Not Sig	17836	NA	1	1	6	NA	-1	NA	-1
BFSP1	NW_005081883.1	131677	149513	Adult Male	AMV	Adult Male Brain	3.625330196	-0.646354092	1.450556789	0.143842923	0.704490126	0.833567305	Not Sig	17.84000784	-0.066389686	0.288742778	0.055995789	0.812940514	0.979007305	Not Sig	17836	NA	1	1	6	NA	-1	NA	-1
BFSP1	NW_005081883.1	131677	149513	Nestling Female	Hyp	Nestling Female Brain	14.21000508	0.949259263	0.67844894	1.51873306	0.21781132	0.328299911	Not Sig	52.49698906	0.444773704	0.44416921	1.001555901	0.316934318	0.92718541	Not Sig	17836	NA	1	1	6	NA	-1	NA	-1
BFSP1	NW_005081883.1	131677	149513	Nestling Female	AMV	Nestling Female Brain	9.014341353	0.812520186	0.868505937	0.711675069	0.39888829	0.558659513	Not Sig	36.3146229	0.202210047	0.406186352	0.247119625	0.61911058	0.996634902	Not Sig	17836	NA	1	1	6	NA	-1	NA	-1
BFSP1	NW_005081883.1	131677	149513	Nestling Male	Hyp	Nestling Male Brain	10.33162027	0.954246946	0.95868423	0.533090695	0.465310358	0.662858296	Not Sig	39.03499726	-0.127694392	0.582371967	0.047893048	0.826770944	1	Not Sig	17836	NA	1	1	6	NA	-1	NA	-1
BFSP1	NW_005081883.1	131677	149513	Nestling Male	AMV	Nestling Male Brain	8.053780987	-0.528665767	1.505972888	0.082210801	0.77432346	0.866405169	Not Sig	29.88578068	-0.149244763	0.538280278	0.076705183	0.78181312	0.952129454	Not Sig	17836	NA	1	1	6	NA	-1	NA	-1
BICRAL	NW_005081548.1	4948887	4994562	Adult Female	Hyp	Adult Female Brain	1168.443303	-0.273482871	0.072713937	14.11591289	0.000171884	0.000768722	Sig	5734.555738	-0.110675371	0.102294824	1.172972245	0.278791365	0.998912819	Not Sig	45675	NA	4	8	1	73548.96667	0.632118969	20349.46667	0.185903933
BICRAL	NW_005081548.1	4948887	4994562	Adult Female	AMV	Adult Female Brain	842.1787311	-0.38881021	0.095399182	16.51857585	4.82e-05	0.000223986	Sig	3850.704564	-0.053463913	0.08144822	0.431305165	0.511349218	0.973538439	Not Sig	45675	NA	4	8	1	73548.96667	0.632118969	20349.46667	0.185903933
BICRAL	NW_005081548.1	4948887	4994562	Adult Male	Heart	Adult Male Horton et al	218.5951698	-0.100037466	0.06402659	2.428579199	0.11914084	0.183375137	Not Sig	NA	NA	NA	NA	NA	NA	NA	45675	NA	4	8	1	73548.96667	0.632118969	20349.46667	0.185903933
BICRAL	NW_005081548.1	4948887	4994562	Adult Male	Liver	Adult Male Horton et al	167.6015108	-0.100020532	0.065021598	2.357961528	0.124644971	0.206115461	Not Sig	NA	NA	NA	NA	NA	NA	NA	45675	NA	4	8	1	73548.96667	0.632118969	20349.46667	0.185903933
BICRAL	NW_005081548.1	4948887	4994562	Adult Male	Hyp	Adult Male Brain	428.2089159	-0.23038254	0.063973097	12.9365568	0.000322227	0.001104179	Sig	2491.809351	-0.101360649	0.035846341	8.001007101	0.004675134	0.212943811	Not Sig	45675	NA	4	8	1	73548.96667	0.632118969	20349.46667	0.185903933
BICRAL	NW_005081548.1	4948887	4994562	Adult Male	AMV	Adult Male Brain	282.4819662	-0.251708853	0.079633119	9.958190256	0.001601354	0.00437341	Sig	1647.902367	-0.220824125	0.054715231	16.30879084	5.38e-05	0.010347507	Sig	45675	NA	4	8	1	73548.96667	0.632118969	20349.46667	0.185903933
BICRAL	NW_005081548.1	4948887	4994562	Nestling Female	Hyp	Nestling Female Brain	836.3142682	-0.071919916	0.051845611	1.923401388	0.165482178	0.2607979	Not Sig	4033.878892	-0.021005287	0.118011235	0.031696101	0.858696284	0.996728869	Not Sig	45675	NA	4	8	1	73548.96667	0.632118969	20349.46667	0.185903933
BICRAL	NW_005081548.1	4948887	4994562	Nestling Female	AMV	Nestling Female Brain	596.9276334	-0.425830828	0.11714786	13.07883339	0.000298651	0.001207438	Sig	2833.264005	-0.163843533	0.175126424	0.877172951	0.348977156	0.996634902	Not Sig	45675	NA	4	8	1	73548.96667	0.632118969	20349.46667	0.185903933
BICRAL	NW_005081548.1	4948887	4994562	Nestling Male	Hyp	Nestling Male Brain	880.7694189	-0.176434086	0.077864714	5.121667199	0.023628905	0.06268542	Not Sig	4741.26705	-0.23724706	0.096691081	5.974432606	0.014514751	0.533047884	Not Sig	45675	NA	4	8	1	73548.96667	0.632118969	20349.46667	0.185903933
BICRAL	NW_005081548.1	4948887	4994562	Nestling Male	AMV	Nestling Male Brain	667.4783215	-0.359189594	0.116278295	9.4524636	0.002108657	0.008143507	Sig	3401.052318	-0.280397193	0.142507413	3.822842975	0.050558384	0.55664712	Not Sig	45675	NA	4	8	1	73548.96667	0.632118969	20349.46667	0.185903933
BIRC6	NW_005081574.1	4423628	4601123	Adult Female	Hyp	Adult Female Brain	2884.264987	0.008713933	0.052333421	0.027698064	0.86782065	0.929744651	Not Sig	10008.67939	0.152361918	0.110720942	1.88678418	0.169565081	0.998912819	Not Sig	177495	NA	4	50	19	88208.08	0.347106955	9073.482	0.643958333
BIRC6	NW_005081574.1	4423628	4601123	Adult Female	AMV	Adult Female Brain	2720.397446	0.081239083	0.05073141	2.562583722	0.109419626	0.21682044	Not Sig	9402.330362	0.1539361	0.145706204	1.112009496	0.291645545	0.918274419	Not Sig	177495	NA	4	50	19	88208.08	0.347106955	9073.482	0.643958333
BIRC6	NW_005081574.1	4423628	4601123	Adult Male	Heart	Adult Male Horton et al	919.7168022	0.019924928	0.028024951	0.505170372	0.477237072	0.590212845	Not Sig	NA	NA	NA	NA	NA	NA	NA	177495	NA	4	50	19	88208.08	0.347106955	9073.482	0.643958333
BIRC6	NW_005081574.1	4423628	4601123	Adult Male	Liver	Adult Male Horton et al	1450.343617	0.179784524	0.024935242	51.94991846	5.69e-13	5.12e-12	Sig	NA	NA	NA	NA	NA	NA	NA	177495	NA	4	50	19	88208.08	0.347106955	9073.482	0.643958333
BIRC6	NW_005081574.1	4423628	4601123	Adult Male	Hyp	Adult Male Brain	878.8217079	0.066859143	0.041141629	2.63933842	0.104246947	0.183084788	Not Sig	3519.494633	0.114317432	0.062974727	3.289867437	0.06970865	0.756040887	Not Sig	177495	NA	4	50	19	88208.08	0.347106955	9073.482	0.643958333
BIRC6	NW_005081574.1	4423628	4601123	Adult Male	AMV	Adult Male Brain	776.0076286	0.119157074	0.045208862	6.941933152	0.008419807	0.019809297	Sig	3163.891908	-0.059877637	0.088754093	0.455417288	0.499773534	0.925039513	Not Sig	177495	NA	4	50	19	88208.08	0.347106955	9073.482	0.643958333
BIRC6	NW_005081574.1	4423628	4601123	Nestling Female	Hyp	Nestling Female Brain	3124.753985	0.135947608	0.033025434	16.93289164	3.87e-05	0.000161275	Sig	11202.14677	0.020221685	0.106691173	0.035926025	0.84966834	0.996728869	Not Sig	177495	NA	4	50	19	88208.08	0.347106955	9073.482	0.643958333
BIRC6	NW_005081574.1	4423628	4601123	Nestling Female	AMV	Nestling Female Brain	3192.039203	0.109556725	0.043131769	6.44533183	0.011124426	0.029684822	Sig	10834.14821	-0.060428607	0.191527669	0.099635346	0.752267672	0.996634902	Not Sig	177495	NA	4	50	19	88208.08	0.347106955	9073.482	0.643958333
BIRC6	NW_005081574.1	4423628	4601123	Nestling Male	Hyp	Nestling Male Brain	3192.577523	0.076343368	0.040281301	3.590290865	0.05811807	0.133732738	Not Sig	12827.79095	-0.122377005	0.111214666	1.206226493	0.272080745	0.995064234	Not Sig	177495	NA	4	50	19	88208.08	0.347106955	9073.482	0.643958333
BIRC6	NW_005081574.1	4423628	4601123	Nestling Male	AMV	Nestling Male Brain	3338.83348	0.070669974	0.061470906	1.318810376	0.250805663	0.406234524	Not Sig	12296.2556	-0.260633913	0.175873979	2.170296073	0.140699143	0.671582532	Not Sig	177495	NA	4	50	19	88208.08	0.347106955	9073.482	0.643958333
BLK	NW_005081831.1	248712	285175	Adult Female	Hyp	Adult Female Brain	NA	NA	NA	NA	NA	NA	NA	23.18874219	-0.21087552	1.178558731	0.032101231	0.85780566	0.998912819	Not Sig	NA	NA	NA	NA	0	NA	-1	NA	-1
BLK	NW_005081831.1	248712	285175	Adult Female	AMV	Adult Female Brain	NA	NA	NA	NA	NA	NA	NA	9.686203362	-1.395747449	1.739657824	0.640818913	0.423414412	0.959797006	Not Sig	NA	NA	NA	NA	0	NA	-1	NA	-1
BLK	NW_005081831.1	248712	285175	Adult Male	Heart	Adult Male Horton et al	NA	NA	NA	NA	NA	NA	NA	NA	NA	NA	NA	NA	NA	NA	NA	NA	NA	NA	0	NA	-1	NA	-1
BLK	NW_005081831.1	248712	285175	Adult Male	Liver	Adult Male Horton et al	NA	NA	NA	NA	NA	NA	NA	NA	NA	NA	NA	NA	NA	NA	NA	NA	NA	NA	0	NA	-1	NA	-1
BLK	NW_005081831.1	248712	285175	Adult Male	Hyp	Adult Male Brain	NA	NA	NA	NA	NA	NA	NA	6.135780552	0.674813475	0.787455559	0.726248463	0.394101917	0.964851606	Not Sig	NA	NA	NA	NA	0	NA	-1	NA	-1
BLK	NW_005081831.1	248712	285175	Adult Male	AMV	Adult Male Brain	NA	NA	NA	NA	NA	NA	NA	4.905607097	-0.801139659	0.882938241	0.818597974	0.365590404	0.887865585	Not Sig	NA	NA	NA	NA	0	NA	-1	NA	-1
BLK	NW_005081831.1	248712	285175	Nestling Female	Hyp	Nestling Female Brain	NA	NA	NA	NA	NA	NA	NA	24.37943034	-0.399331407	0.738883328	0.291814905	0.589059837	0.985384138	Not Sig	NA	NA	NA	NA	0	NA	-1	NA	-1
BLK	NW_005081831.1	248712	285175	Nestling Female	AMV	Nestling Female Brain	NA	NA	NA	NA	NA	NA	NA	11.52741664	-0.367458054	1.522709732	0.058548005	0.808805773	0.996634902	Not Sig	NA	NA	NA	NA	0	NA	-1	NA	-1
BLK	NW_005081831.1	248712	285175	Nestling Male	Hyp	Nestling Male Brain	NA	NA	NA	NA	NA	NA	NA	32.21333684	-0.495897379	0.885001658	0.308127789	0.578831327	0.996116837	Not Sig	NA	NA	NA	NA	0	NA	-1	NA	-1
BLK	NW_005081831.1	248712	285175	Nestling Male	AMV	Nestling Male Brain	NA	NA	NA	NA	NA	NA	NA	10.80427691	-0.211498313	1.861678802	0.012836541	0.909793937	0.983867091	Not Sig	NA	NA	NA	NA	0	NA	-1	NA	-1
BMP2	NW_005081577.1	4257605	4259614	Adult Female	Hyp	Adult Female Brain	NA	NA	NA	NA	NA	NA	NA	161.836241	-0.211343761	0.194837147	1.179853948	0.277385731	0.998912819	Not Sig	2009	NA	NA	1	30	91243.1	0.284628872	4537.47	0.419986024
BMP2	NW_005081577.1	4257605	4259614	Adult Female	AMV	Adult Female Brain	NA	NA	NA	NA	NA	NA	NA	63.01704234	-0.532077812	0.280887233	3.611612537	0.05737746	0.659913587	Not Sig	2009	NA	NA	1	30	91243.1	0.284628872	4537.47	0.419986024
BMP2	NW_005081577.1	4257605	4259614	Adult Male	Heart	Adult Male Horton et al	0.099746904	-0.001433752	2.955642659	4.14e-07	0.999486432	100	Not Sig	NA	NA	NA	NA	NA	NA	NA	2009	NA	NA	1	30	91243.1	0.284628872	4537.47	0.419986024
BMP2	NW_005081577.1	4257605	4259614	Adult Male	Liver	Adult Male Horton et al	0.928462019	0.351794786	2.93613373	0.01457933	0.903893096	100	Not Sig	NA	NA	NA	NA	NA	NA	NA	2009	NA	NA	1	30	91243.1	0.284628872	4537.47	0.419986024
BMP2	NW_005081577.1	4257605	4259614	Adult Male	Hyp	Adult Male Brain	1.789674116	-0.27316097	1.187655276	0.039422088	0.842614797	0.909159761	Not Sig	67.4775971	-0.244863339	0.178108333	1.893356024	0.168823881	0.908484497	Not Sig	2009	NA	NA	1	30	91243.1	0.284628872	4537.47	0.419986024
BMP2	NW_005081577.1	4257605	4259614	Adult Male	AMV	Adult Male Brain	0.551011824	1.094234658	3.012862971	0.140371902	0.707911571	0.83480891	Not Sig	37.70670646	-0.262730519	0.232789422	1.285352696	0.256906159	0.823262261	Not Sig	2009	NA	NA	1	30	91243.1	0.284628872	4537.47	0.419986024
BMP2	NW_005081577.1	4257605	4259614	Nestling Female	Hyp	Nestling Female Brain	NA	NA	NA	NA	NA	NA	NA	279.3087327	-0.640863363	0.240706802	7.02987678	0.008016087	0.260594767	Not Sig	2009	NA	NA	1	30	91243.1	0.284628872	4537.47	0.419986024
BMP2	NW_005081577.1	4257605	4259614	Nestling Female	AMV	Nestling Female Brain	NA	NA	NA	NA	NA	NA	NA	114.8043478	0.78508794	0.267560203	8.449026193	0.00365239	0.566508932	Not Sig	2009	NA	NA	1	30	91243.1	0.284628872	4537.47	0.419986024
BMP2	NW_005081577.1	4257605	4259614	Nestling Male	Hyp	Nestling Male Brain	NA	NA	NA	NA	NA	NA	NA	297.3586904	0.298619847	0.250726774	1.428186912	0.232060563	0.995064234	Not Sig	2009	NA	NA	1	30	91243.1	0.284628872	4537.47	0.419986024
BMP2	NW_005081577.1	4257605	4259614	Nestling Male	AMV	Nestling Male Brain	NA	NA	NA	NA	NA	NA	NA	145.4006122	0.621439961	0.444569719	1.98654285	0.158702825	0.683983042	Not Sig	2009	NA	NA	1	30	91243.1	0.284628872	4537.47	0.419986024
BMP5	NW_005081569.1	5334882	5392245	Adult Female	Hyp	Adult Female Brain	0.850536438	-0.010519987	3.052310359	1.36e-05	0.99705417	100	Not Sig	2.819114274	0.574888741	2.947832582	0.037371382	0.846710877	100	Not Sig	57363	NA	1	1	13	60834.25	0.855493863	7119.595	0.091369672
BMP5	NW_005081569.1	5334882	5392245	Adult Female	AMV	Adult Female Brain	2.599443928	0.256201858	1.8655151	0.016683808	0.897226446	0.931935399	Not Sig	4.462839111	-0.502512728	2.133962612	0.055604048	0.813583907	0.992913561	Not Sig	57363	NA	1	1	13	60834.25	0.855493863	7119.595	0.091369672
BMP5	NW_005081569.1	5334882	5392245	Adult Male	Heart	Adult Male Horton et al	75.53182272	-0.064257862	0.107094096	0.355501902	0.55101504	0.657417944	Not Sig	NA	NA	NA	NA	NA	NA	NA	57363	NA	1	1	13	60834.25	0.855493863	7119.595	0.091369672
BMP5	NW_005081569.1	5334882	5392245	Adult Male	Liver	Adult Male Horton et al	12.87159252	2.955504548	0.65008021	15.66953558	7.54e-05	0.000257007	Sig	NA	NA	NA	NA	NA	NA	NA	57363	NA	1	1	13	60834.25	0.855493863	7119.595	0.091369672
BMP5	NW_005081569.1	5334882	5392245	Adult Male	Hyp	Adult Male Brain	0.301565786	-0.391298136	3.026690492	0.026598354	0.87044756	100	Not Sig	1.418784922	-1.583687177	2.330987495	0.45393874	0.50047042	100	Not Sig	57363	NA	1	1	13	60834.25	0.855493863	7119.595	0.091369672
BMP5	NW_005081569.1	5334882	5392245	Adult Male	AMV	Adult Male Brain	5.438200114	0.774871846	0.900255753	0.630378221	0.427216614	0.577349584	Not Sig	13.11054816	0.486911857	0.822308364	0.347489502	0.555537714	0.93582859	Not Sig	57363	NA	1	1	13	60834.25	0.855493863	7119.595	0.091369672
BMP5	NW_005081569.1	5334882	5392245	Nestling Female	Hyp	Nestling Female Brain	8.248426624	-0.234452877	0.971978423	0.054878165	0.814782446	0.862172854	Not Sig	45.64448186	-0.899906976	0.58541118	2.334070224	0.126570543	0.773064672	Not Sig	57363	NA	1	1	13	60834.25	0.855493863	7119.595	0.091369672
BMP5	NW_005081569.1	5334882	5392245	Nestling Female	AMV	Nestling Female Brain	6.351310264	-0.806881285	2.978526885	0.079004783	0.778650655	0.871890055	Not Sig	23.60816184	-0.173117189	1.175994048	0.021771574	0.882696389	0.996634902	Not Sig	57363	NA	1	1	13	60834.25	0.855493863	7119.595	0.091369672
BMP5	NW_005081569.1	5334882	5392245	Nestling Male	Hyp	Nestling Male Brain	24.23167828	-1.367853759	0.560555746	5.918331319	0.014984143	0.042429193	Sig	95.76659501	-0.231080966	0.80356539	0.08219784	0.774340769	1	Not Sig	57363	NA	1	1	13	60834.25	0.855493863	7119.595	0.091369672
BMP5	NW_005081569.1	5334882	5392245	Nestling Male	AMV	Nestling Male Brain	9.717367881	-0.715922552	0.995168171	0.483379911	0.486895332	0.663948179	Not Sig	33.95428958	-0.293346267	1.164849386	0.062638674	0.802372992	0.95786027	Not Sig	57363	NA	1	1	13	60834.25	0.855493863	7119.595	0.091369672
BORCS6	NW_005081569.1	4656371	4659517	Adult Female	Hyp	Adult Female Brain	NA	NA	NA	NA	NA	NA	NA	2864.151139	0.06628181	0.123958947	0.285556858	0.593081971	0.998912819	Not Sig	3146	NA	NA	NA	27	76376.7	0.570426651	5357.21	0.285115304
BORCS6	NW_005081569.1	4656371	4659517	Adult Female	AMV	Adult Female Brain	NA	NA	NA	NA	NA	NA	NA	1365.0241	0.663751124	0.773262479	0.720515277	0.395974941	0.952792057	Not Sig	3146	NA	NA	NA	27	76376.7	0.570426651	5357.21	0.285115304
BORCS6	NW_005081569.1	4656371	4659517	Adult Male	Heart	Adult Male Horton et al	67.74706394	0.208119811	0.117720747	3.070241507	0.079737625	0.130241014	Not Sig	NA	NA	NA	NA	NA	NA	NA	3146	NA	NA	NA	27	76376.7	0.570426651	5357.21	0.285115304
BORCS6	NW_005081569.1	4656371	4659517	Adult Male	Liver	Adult Male Horton et al	61.03322048	-0.169864133	0.166890822	0.996494655	0.318160188	0.447330048	Not Sig	NA	NA	NA	NA	NA	NA	NA	3146	NA	NA	NA	27	76376.7	0.570426651	5357.21	0.285115304
BORCS6	NW_005081569.1	4656371	4659517	Adult Male	Hyp	Adult Male Brain	402.5093455	-0.02999204	0.081598523	0.134220444	0.714095655	0.818477204	Not Sig	1260.733361	0.025965267	0.04709134	0.304736757	0.580928025	0.981669138	Not Sig	3146	NA	NA	NA	27	76376.7	0.570426651	5357.21	0.285115304
BORCS6	NW_005081569.1	4656371	4659517	Adult Male	AMV	Adult Male Brain	339.1144084	0.21071824	0.062738222	11.27248316	0.000786644	0.002292005	Sig	982.2551713	0.261124133	0.079933486	10.63665459	0.00110868	0.093345647	Not Sig	3146	NA	NA	NA	27	76376.7	0.570426651	5357.21	0.285115304
BORCS6	NW_005081569.1	4656371	4659517	Nestling Female	Hyp	Nestling Female Brain	NA	NA	NA	NA	NA	NA	NA	1716.228069	0.066266945	0.343000657	0.037323523	0.846807845	0.996728869	Not Sig	3146	NA	NA	NA	27	76376.7	0.570426651	5357.21	0.285115304
BORCS6	NW_005081569.1	4656371	4659517	Nestling Female	AMV	Nestling Female Brain	NA	NA	NA	NA	NA	NA	NA	1262.269895	0.390977263	0.321325491	1.467179681	0.225791204	0.996634902	Not Sig	3146	NA	NA	NA	27	76376.7	0.570426651	5357.21	0.285115304
BORCS6	NW_005081569.1	4656371	4659517	Nestling Male	Hyp	Nestling Male Brain	NA	NA	NA	NA	NA	NA	NA	1899.510713	0.218172523	0.36051677	0.368178674	0.543998725	0.995508038	Not Sig	3146	NA	NA	NA	27	76376.7	0.570426651	5357.21	0.285115304
BORCS6	NW_005081569.1	4656371	4659517	Nestling Male	AMV	Nestling Male Brain	NA	NA	NA	NA	NA	NA	NA	1105.876583	-0.17159308	0.29357853	0.339081103	0.560360108	0.885715061	Not Sig	3146	NA	NA	NA	27	76376.7	0.570426651	5357.21	0.285115304
BPNT1	NW_005081548.1	491857	500068	Adult Female	Hyp	Adult Female Brain	334.2608836	0.463063845	0.133490499	11.95562013	0.000544828	0.002144622	Sig	3154.666969	0.31521508	0.073116475	18.44464635	1.75e-05	0.006225056	Sig	8211	NA	NA	NA	9	88534.5	0.326319891	28743.9	0.081600832
BPNT1	NW_005081548.1	491857	500068	Adult Female	AMV	Adult Female Brain	276.5333236	0.347414599	0.13862462	6.268636972	0.012289364	0.033756464	Sig	2645.171614	0.288776427	0.090858226	10.03222495	0.001538251	0.113946994	Not Sig	8211	NA	NA	NA	9	88534.5	0.326319891	28743.9	0.081600832
BPNT1	NW_005081548.1	491857	500068	Adult Male	Heart	Adult Male Horton et al	32.57052384	0.527150083	0.139587159	14.15220952	0.000168599	0.000460057	Sig	NA	NA	NA	NA	NA	NA	NA	8211	NA	NA	NA	9	88534.5	0.326319891	28743.9	0.081600832
BPNT1	NW_005081548.1	491857	500068	Adult Male	Liver	Adult Male Horton et al	152.7401907	0.879244454	0.080039439	119.5837061	7.8e-28	1.94e-26	Sig	NA	NA	NA	NA	NA	NA	NA	8211	NA	NA	NA	9	88534.5	0.326319891	28743.9	0.081600832
BPNT1	NW_005081548.1	491857	500068	Adult Male	Hyp	Adult Male Brain	200.7817122	0.493078472	0.098073406	25.10953124	5.42e-07	2.74e-06	Sig	2024.153637	0.261877105	0.040904168	40.87209719	1.63e-10	7.96e-08	Sig	8211	NA	NA	NA	9	88534.5	0.326319891	28743.9	0.081600832
BPNT1	NW_005081548.1	491857	500068	Adult Male	AMV	Adult Male Brain	160.6135709	0.296930272	0.090655042	10.71250297	0.00106414	0.003024702	Sig	1603.195945	0.276639452	0.047847269	33.3178901	7.83e-09	3.98e-06	Sig	8211	NA	NA	NA	9	88534.5	0.326319891	28743.9	0.081600832
BPNT1	NW_005081548.1	491857	500068	Nestling Female	Hyp	Nestling Female Brain	240.1260154	0.503404356	0.100807673	24.81714079	6.3e-07	3.55e-06	Sig	2298.397587	0.27510129	0.103531988	7.048964131	0.00793111	0.260070494	Not Sig	8211	NA	NA	NA	9	88534.5	0.326319891	28743.9	0.081600832
BPNT1	NW_005081548.1	491857	500068	Nestling Female	AMV	Nestling Female Brain	241.7344867	0.236337641	0.164546164	2.028455443	0.15437743	0.271735782	Not Sig	2071.002907	0.321964336	0.169260089	3.592613971	0.058036886	0.996634902	Not Sig	8211	NA	NA	NA	9	88534.5	0.326319891	28743.9	0.081600832
BPNT1	NW_005081548.1	491857	500068	Nestling Male	Hyp	Nestling Male Brain	226.3786182	0.336917595	0.154541124	4.701928575	0.030128791	0.076941049	Not Sig	2342.167439	0.218912423	0.100640946	4.754909762	0.029214825	0.654140571	Not Sig	8211	NA	NA	NA	9	88534.5	0.326319891	28743.9	0.081600832
BPNT1	NW_005081548.1	491857	500068	Nestling Male	AMV	Nestling Male Brain	226.1295339	0.339769686	0.166616531	4.110314405	0.042622438	0.099805935	Not Sig	1985.245678	0.389034501	0.116681567	11.2525522	0.000795136	0.165982268	Not Sig	8211	NA	NA	NA	9	88534.5	0.326319891	28743.9	0.081600832
BROX	NW_005081821.1	310511	327948	Adult Female	Hyp	Adult Female Brain	1724.925958	0.069560913	0.059871526	1.348871597	0.245475483	0.406931754	Not Sig	9572.467281	-0.007261941	0.099179986	0.005362099	0.941625993	0.998912819	Not Sig	17437	NA	1	1	3	88397.9	0.338690824	31193.15	0.053534304
BROX	NW_005081821.1	310511	327948	Adult Female	AMV	Adult Female Brain	1622.41335	0.122645815	0.063684449	3.704993289	0.05424989	0.12163754	Not Sig	8419.419393	0.074715574	0.076276443	0.957860221	0.327726583	0.92596227	Not Sig	17437	NA	1	1	3	88397.9	0.338690824	31193.15	0.053534304
BROX	NW_005081821.1	310511	327948	Adult Male	Heart	Adult Male Horton et al	119.4247409	-0.335491791	0.082103665	16.56961977	4.69e-05	0.000138922	Sig	NA	NA	NA	NA	NA	NA	NA	17437	NA	1	1	3	88397.9	0.338690824	31193.15	0.053534304
BROX	NW_005081821.1	310511	327948	Adult Male	Liver	Adult Male Horton et al	162.2022971	-0.013084397	0.06124703	0.045529791	0.831032833	0.901441264	Not Sig	NA	NA	NA	NA	NA	NA	NA	17437	NA	1	1	3	88397.9	0.338690824	31193.15	0.053534304
BROX	NW_005081821.1	310511	327948	Adult Male	Hyp	Adult Male Brain	756.0982774	0.14330352	0.040363393	12.60211671	0.00038531	0.001295036	Sig	4741.955734	0.111945289	0.031620864	12.51759527	0.000403137	0.036602742	Sig	17437	NA	1	1	3	88397.9	0.338690824	31193.15	0.053534304
BROX	NW_005081821.1	310511	327948	Adult Male	AMV	Adult Male Brain	672.2560487	0.237294691	0.052637145	20.29076239	6.65e-06	2.68e-05	Sig	3924.096597	0.097387457	0.041181561	5.585918633	0.018105435	0.448274023	Not Sig	17437	NA	1	1	3	88397.9	0.338690824	31193.15	0.053534304
BROX	NW_005081821.1	310511	327948	Nestling Female	Hyp	Nestling Female Brain	1872.848372	0.245363962	0.044682347	30.09264668	4.12e-08	2.72e-07	Sig	9780.318751	0.015011455	0.074850023	0.040233772	0.8410242	0.996728869	Not Sig	17437	NA	1	1	3	88397.9	0.338690824	31193.15	0.053534304
BROX	NW_005081821.1	310511	327948	Nestling Female	AMV	Nestling Female Brain	2035.096774	0.184384844	0.0717419	6.574160473	0.01034698	0.028107937	Sig	9460.272682	0.023678494	0.123375239	0.036822141	0.847827619	0.996634902	Not Sig	17437	NA	1	1	3	88397.9	0.338690824	31193.15	0.053534304
BROX	NW_005081821.1	310511	327948	Nestling Male	Hyp	Nestling Male Brain	2038.139729	0.214982851	0.05630653	14.54397394	0.000136926	0.000755859	Sig	11035.57021	-0.001413258	0.093632262	0.000228085	0.987950408	1	Not Sig	17437	NA	1	1	3	88397.9	0.338690824	31193.15	0.053534304
BROX	NW_005081821.1	310511	327948	Nestling Male	AMV	Nestling Male Brain	2308.500782	0.275653773	0.058617131	22.06267533	2.64e-06	2.22e-05	Sig	10751.84291	0.017695511	0.089249194	0.039341569	0.842773509	0.969671415	Not Sig	17437	NA	1	1	3	88397.9	0.338690824	31193.15	0.053534304
BTBD3	NW_005081602.1	3423342	3434195	Adult Female	Hyp	Adult Female Brain	2353.358328	-0.298144307	0.058144621	26.22201862	3.04e-07	2.48e-06	Sig	9691.291415	-0.410240009	0.274682662	2.242324717	0.134278966	0.99499244	Not Sig	10853	NA	1	2	20	NA	-1	NA	-1
BTBD3	NW_005081602.1	3423342	3434195	Adult Female	AMV	Adult Female Brain	4330.241108	0.320912511	0.064308321	24.740033	6.56e-07	4.24e-06	Sig	16535.69377	0.278629817	0.096614117	8.256536917	0.004060552	0.202348356	Not Sig	10853	NA	1	2	20	NA	-1	NA	-1
BTBD3	NW_005081602.1	3423342	3434195	Adult Male	Heart	Adult Male Horton et al	64.9519434	-0.103209178	0.114308079	0.802988047	0.370201491	0.47527081	Not Sig	NA	NA	NA	NA	NA	NA	NA	10853	NA	1	2	20	NA	-1	NA	-1
BTBD3	NW_005081602.1	3423342	3434195	Adult Male	Liver	Adult Male Horton et al	17.07679349	-0.69140677	0.280531231	5.558510579	0.018391054	0.04026021	Sig	NA	NA	NA	NA	NA	NA	NA	10853	NA	1	2	20	NA	-1	NA	-1
BTBD3	NW_005081602.1	3423342	3434195	Adult Male	Hyp	Adult Male Brain	1279.832386	-0.200549472	0.035638213	31.64951895	1.85e-08	1.16e-07	Sig	5828.533644	-0.057172786	0.043120562	1.759340026	0.184706856	0.914406222	Not Sig	10853	NA	1	2	20	NA	-1	NA	-1
BTBD3	NW_005081602.1	3423342	3434195	Adult Male	AMV	Adult Male Brain	2000.570658	0.531343638	0.048606021	118.7365011	1.2e-27	3.13e-26	Sig	7905.428896	0.342841558	0.061688561	30.69604429	3.02e-08	1.43e-05	Sig	10853	NA	1	2	20	NA	-1	NA	-1
BTBD3	NW_005081602.1	3423342	3434195	Nestling Female	Hyp	Nestling Female Brain	1827.897643	-0.179647048	0.048790696	13.52495582	0.000235412	0.000827533	Sig	8333.152398	-0.304906812	0.118355053	6.624730208	0.010057238	0.299941979	Not Sig	10853	NA	1	2	20	NA	-1	NA	-1
BTBD3	NW_005081602.1	3423342	3434195	Nestling Female	AMV	Nestling Female Brain	2085.427719	0.043996792	0.083984349	0.272579749	0.601606482	0.740472701	Not Sig	7507.515859	-0.072765922	0.212786833	0.11706695	0.732237651	0.996634902	Not Sig	10853	NA	1	2	20	NA	-1	NA	-1
BTBD3	NW_005081602.1	3423342	3434195	Nestling Male	Hyp	Nestling Male Brain	1959.026343	-0.132660621	0.06376339	4.314528868	0.037788233	0.093233723	Not Sig	8899.816759	-0.136956838	0.138962935	0.967141111	0.325394214	0.995064234	Not Sig	10853	NA	1	2	20	NA	-1	NA	-1
BTBD3	NW_005081602.1	3423342	3434195	Nestling Male	AMV	Nestling Male Brain	2417.750953	0.129486357	0.092960445	1.923622783	0.165457836	0.301494473	Not Sig	8791.262653	0.080795154	0.145533334	0.309198668	0.578172332	0.891142445	Not Sig	10853	NA	1	2	20	NA	-1	NA	-1
BTBD9	NW_005081548.1	11705805	11819713	Adult Female	Hyp	Adult Female Brain	3954.297983	0.013003011	0.058612187	0.049067712	0.824693538	0.910454735	Not Sig	11725.50719	0.028879294	0.12259662	0.05545668	0.813826561	0.998912819	Not Sig	113908	NA	1	5	14	74540.26667	0.598934996	8441.06	0.70546875
BTBD9	NW_005081548.1	11705805	11819713	Adult Female	AMV	Adult Female Brain	4030.116153	0.022488321	0.043698458	0.264713502	0.606900252	0.744076336	Not Sig	11442.4357	0.079598982	0.105495712	0.568276111	0.450944758	0.962072467	Not Sig	113908	NA	1	5	14	74540.26667	0.598934996	8441.06	0.70546875
BTBD9	NW_005081548.1	11705805	11819713	Adult Male	Heart	Adult Male Horton et al	836.5882161	0.006909665	0.025133721	0.075550372	0.783420511	0.848133595	Not Sig	NA	NA	NA	NA	NA	NA	NA	113908	NA	1	5	14	74540.26667	0.598934996	8441.06	0.70546875
BTBD9	NW_005081548.1	11705805	11819713	Adult Male	Liver	Adult Male Horton et al	671.356039	-0.147714146	0.040486523	13.28244406	0.000267903	0.000844694	Sig	NA	NA	NA	NA	NA	NA	NA	113908	NA	1	5	14	74540.26667	0.598934996	8441.06	0.70546875
BTBD9	NW_005081548.1	11705805	11819713	Adult Male	Hyp	Adult Male Brain	1502.855323	0.059810529	0.028221388	4.491413199	0.034065506	0.070130944	Not Sig	4660.289426	0.098470114	0.039797844	6.114259848	0.013409555	0.381421169	Not Sig	113908	NA	1	5	14	74540.26667	0.598934996	8441.06	0.70546875
BTBD9	NW_005081548.1	11705805	11819713	Adult Male	AMV	Adult Male Brain	1406.668032	0.078165688	0.035002888	4.98470174	0.025572393	0.05213543	Not Sig	4328.603373	0.003718912	0.076261242	0.002397398	0.960948596	0.994087908	Not Sig	113908	NA	1	5	14	74540.26667	0.598934996	8441.06	0.70546875
BTBD9	NW_005081548.1	11705805	11819713	Nestling Female	Hyp	Nestling Female Brain	2447.85467	0.16132824	0.037489911	18.49889315	1.7e-05	7.6e-05	Sig	7446.969099	-0.009114453	0.112061966	0.006618561	0.935160004	0.996896415	Not Sig	113908	NA	1	5	14	74540.26667	0.598934996	8441.06	0.70546875
BTBD9	NW_005081548.1	11705805	11819713	Nestling Female	AMV	Nestling Female Brain	2027.286875	0.012849393	0.048082346	0.071362813	0.789362764	0.876950417	Not Sig	5898.022015	-0.13092316	0.16463031	0.633528743	0.426063894	0.996634902	Not Sig	113908	NA	1	5	14	74540.26667	0.598934996	8441.06	0.70546875
BTBD9	NW_005081548.1	11705805	11819713	Nestling Male	Hyp	Nestling Male Brain	2511.093093	0.181158766	0.044326823	16.68879307	4.4e-05	0.000267423	Sig	8358.559812	-0.124795454	0.124986828	0.993115432	0.318982126	0.995064234	Not Sig	113908	NA	1	5	14	74540.26667	0.598934996	8441.06	0.70546875
BTBD9	NW_005081548.1	11705805	11819713	Nestling Male	AMV	Nestling Male Brain	2210.089922	-0.123390961	0.067915322	3.292519571	0.069596149	0.148826476	Not Sig	6725.980512	-0.25559985	0.153615317	2.736847982	0.098058011	0.629716246	Not Sig	113908	NA	1	5	14	74540.26667	0.598934996	8441.06	0.70546875
BUB1	NW_005081577.1	1352064	1365218	Adult Female	Hyp	Adult Female Brain	NA	NA	NA	NA	NA	NA	NA	NA	NA	NA	NA	NA	NA	NA	13154	NA	3	3	31	92626.7	0.311221508	6843.015	0.107617051
BUB1	NW_005081577.1	1352064	1365218	Adult Female	AMV	Adult Female Brain	NA	NA	NA	NA	NA	NA	NA	NA	NA	NA	NA	NA	NA	NA	13154	NA	3	3	31	92626.7	0.311221508	6843.015	0.107617051
BUB1	NW_005081577.1	1352064	1365218	Adult Male	Heart	Adult Male Horton et al	NA	NA	NA	NA	NA	NA	NA	NA	NA	NA	NA	NA	NA	NA	13154	NA	3	3	31	92626.7	0.311221508	6843.015	0.107617051
BUB1	NW_005081577.1	1352064	1365218	Adult Male	Liver	Adult Male Horton et al	NA	NA	NA	NA	NA	NA	NA	NA	NA	NA	NA	NA	NA	NA	13154	NA	3	3	31	92626.7	0.311221508	6843.015	0.107617051
BUB1	NW_005081577.1	1352064	1365218	Adult Male	Hyp	Adult Male Brain	NA	NA	NA	NA	NA	NA	NA	NA	NA	NA	NA	NA	NA	NA	13154	NA	3	3	31	92626.7	0.311221508	6843.015	0.107617051
BUB1	NW_005081577.1	1352064	1365218	Adult Male	AMV	Adult Male Brain	NA	NA	NA	NA	NA	NA	NA	NA	NA	NA	NA	NA	NA	NA	13154	NA	3	3	31	92626.7	0.311221508	6843.015	0.107617051
BUB1	NW_005081577.1	1352064	1365218	Nestling Female	Hyp	Nestling Female Brain	NA	NA	NA	NA	NA	NA	NA	NA	NA	NA	NA	NA	NA	NA	13154	NA	3	3	31	92626.7	0.311221508	6843.015	0.107617051
BUB1	NW_005081577.1	1352064	1365218	Nestling Female	AMV	Nestling Female Brain	NA	NA	NA	NA	NA	NA	NA	NA	NA	NA	NA	NA	NA	NA	13154	NA	3	3	31	92626.7	0.311221508	6843.015	0.107617051
BUB1	NW_005081577.1	1352064	1365218	Nestling Male	Hyp	Nestling Male Brain	NA	NA	NA	NA	NA	NA	NA	NA	NA	NA	NA	NA	NA	NA	13154	NA	3	3	31	92626.7	0.311221508	6843.015	0.107617051
BUB1	NW_005081577.1	1352064	1365218	Nestling Male	AMV	Nestling Male Brain	NA	NA	NA	NA	NA	NA	NA	NA	NA	NA	NA	NA	NA	NA	13154	NA	3	3	31	92626.7	0.311221508	6843.015	0.107617051
BVES	NW_005081708.1	175656	215344	Adult Female	Hyp	Adult Female Brain	NA	NA	NA	NA	NA	NA	NA	336.0526652	0.207757347	0.212874732	0.948510195	0.330098805	0.998912819	Not Sig	NA	NA	NA	NA	0	NA	-1	NA	-1
BVES	NW_005081708.1	175656	215344	Adult Female	AMV	Adult Female Brain	NA	NA	NA	NA	NA	NA	NA	152.0299247	1.089966458	0.343203923	9.706352593	0.001836321	0.127095682	Not Sig	NA	NA	NA	NA	0	NA	-1	NA	-1
BVES	NW_005081708.1	175656	215344	Adult Male	Heart	Adult Male Horton et al	NA	NA	NA	NA	NA	NA	NA	NA	NA	NA	NA	NA	NA	NA	NA	NA	NA	NA	0	NA	-1	NA	-1
BVES	NW_005081708.1	175656	215344	Adult Male	Liver	Adult Male Horton et al	NA	NA	NA	NA	NA	NA	NA	NA	NA	NA	NA	NA	NA	NA	NA	NA	NA	NA	0	NA	-1	NA	-1
BVES	NW_005081708.1	175656	215344	Adult Male	Hyp	Adult Male Brain	NA	NA	NA	NA	NA	NA	NA	NA	NA	NA	NA	NA	NA	NA	NA	NA	NA	NA	0	NA	-1	NA	-1
BVES	NW_005081708.1	175656	215344	Adult Male	AMV	Adult Male Brain	NA	NA	NA	NA	NA	NA	NA	NA	NA	NA	NA	NA	NA	NA	NA	NA	NA	NA	0	NA	-1	NA	-1
BVES	NW_005081708.1	175656	215344	Nestling Female	Hyp	Nestling Female Brain	NA	NA	NA	NA	NA	NA	NA	295.5971789	-0.298338947	0.248337917	1.441090084	0.229963023	0.879080025	Not Sig	NA	NA	NA	NA	0	NA	-1	NA	-1
BVES	NW_005081708.1	175656	215344	Nestling Female	AMV	Nestling Female Brain	NA	NA	NA	NA	NA	NA	NA	116.2761683	-0.050683117	0.291575493	0.030227559	0.861974902	0.996634902	Not Sig	NA	NA	NA	NA	0	NA	-1	NA	-1
BVES	NW_005081708.1	175656	215344	Nestling Male	Hyp	Nestling Male Brain	NA	NA	NA	NA	NA	NA	NA	340.4770111	0.098568729	0.213318745	0.214036511	0.643621857	1	Not Sig	NA	NA	NA	NA	0	NA	-1	NA	-1
BVES	NW_005081708.1	175656	215344	Nestling Male	AMV	Nestling Male Brain	NA	NA	NA	NA	NA	NA	NA	142.8975931	0.413499817	0.412620131	1.01655243	0.31333818	0.785994756	Not Sig	NA	NA	NA	NA	0	NA	-1	NA	-1
C1D	NW_005081615.1	3254190	3268208	Adult Female	Hyp	Adult Female Brain	364.2204665	-0.745853968	0.131173107	31.96406687	1.57e-08	1.51e-07	Sig	1448.37549	-0.511908119	0.145663215	12.41731697	0.000425371	0.074736057	Not Sig	14018	NA	1	NA	10	NA	-1	NA	-1
C1D	NW_005081615.1	3254190	3268208	Adult Female	AMV	Adult Female Brain	366.0922996	-0.787475855	0.134124968	34.04620703	5.38e-09	5.03e-08	Sig	1566.365147	-0.21546898	0.099909905	4.667927409	0.030730992	0.544809207	Not Sig	14018	NA	1	NA	10	NA	-1	NA	-1
C1D	NW_005081615.1	3254190	3268208	Adult Male	Heart	Adult Male Horton et al	NA	NA	NA	NA	NA	NA	NA	NA	NA	NA	NA	NA	NA	NA	14018	NA	1	NA	10	NA	-1	NA	-1
C1D	NW_005081615.1	3254190	3268208	Adult Male	Liver	Adult Male Horton et al	NA	NA	NA	NA	NA	NA	NA	NA	NA	NA	NA	NA	NA	NA	14018	NA	1	NA	10	NA	-1	NA	-1
C1D	NW_005081615.1	3254190	3268208	Adult Male	Hyp	Adult Male Brain	233.7220228	-0.65820512	0.073255317	80.85313808	2.43e-19	3.82e-18	Sig	840.7921133	-0.317945418	0.064061791	24.68546485	6.75e-07	0.000165233	Sig	14018	NA	1	NA	10	NA	-1	NA	-1
C1D	NW_005081615.1	3254190	3268208	Adult Male	AMV	Adult Male Brain	218.9650556	-0.873388545	0.08450974	106.6990336	5.18e-25	1.18e-23	Sig	776.553888	-0.372767874	0.060999434	37.41945137	9.53e-10	5.65e-07	Sig	14018	NA	1	NA	10	NA	-1	NA	-1
C1D	NW_005081615.1	3254190	3268208	Nestling Female	Hyp	Nestling Female Brain	384.5683611	-0.566910713	0.081396849	48.32058892	3.62e-12	3.99e-11	Sig	1309.071812	-0.212719473	0.111106943	3.661078056	0.055697583	0.613060731	Not Sig	14018	NA	1	NA	10	NA	-1	NA	-1
C1D	NW_005081615.1	3254190	3268208	Nestling Female	AMV	Nestling Female Brain	460.4456059	-0.748853072	0.121702281	37.22257557	1.05e-09	1.15e-08	Sig	1436.94588	-0.285418996	0.112733391	6.423913122	0.01125938	0.970101733	Not Sig	14018	NA	1	NA	10	NA	-1	NA	-1
C1D	NW_005081615.1	3254190	3268208	Nestling Male	Hyp	Nestling Male Brain	407.7102468	-0.367590812	0.113268434	10.46931709	0.001213736	0.005102358	Sig	1440.275823	-0.1206082	0.112656475	1.141916252	0.285247778	0.995064234	Not Sig	14018	NA	1	NA	10	NA	-1	NA	-1
C1D	NW_005081615.1	3254190	3268208	Nestling Male	AMV	Nestling Male Brain	460.0688248	-0.670126746	0.117443653	32.22442984	1.37e-08	1.87e-07	Sig	1502.300558	-0.082221651	0.166696085	0.242403744	0.622475369	0.906694845	Not Sig	14018	NA	1	NA	10	NA	-1	NA	-1
CALHM4	NW_005081642.1	420558	423552	Adult Female	Hyp	Adult Female Brain	4.856040628	-1.771397905	1.473813556	1.12533202	0.288773222	0.467688267	Not Sig	27.86823126	-1.06742491	0.660581533	2.617018024	0.105722952	0.967040684	Not Sig	2994	NA	NA	5	9	82990.6	0.428794078	13572.7	0.689189189
CALHM4	NW_005081642.1	420558	423552	Adult Female	AMV	Adult Female Brain	5.465425736	-2.257874661	1.363839712	1.427272859	0.232210026	0.387536258	Not Sig	20.26407114	-0.566365382	0.548506811	1.07471246	0.299883433	0.919278714	Not Sig	2994	NA	NA	5	9	82990.6	0.428794078	13572.7	0.689189189
CALHM4	NW_005081642.1	420558	423552	Adult Male	Heart	Adult Male Horton et al	0.30085537	-0.002235468	2.94893885	-3.11e-07	1	100	Not Sig	NA	NA	NA	NA	NA	NA	NA	2994	NA	NA	5	9	82990.6	0.428794078	13572.7	0.689189189
CALHM4	NW_005081642.1	420558	423552	Adult Male	Liver	Adult Male Horton et al	0.701985433	-0.56434484	2.949963628	0.057766376	0.810061753	100	Not Sig	NA	NA	NA	NA	NA	NA	NA	2994	NA	NA	5	9	82990.6	0.428794078	13572.7	0.689189189
CALHM4	NW_005081642.1	420558	423552	Adult Male	Hyp	Adult Male Brain	3.335968161	-4.698738639	1.42574215	8.936686638	0.002794993	0.007677108	Sig	12.66882931	-0.590060495	0.690246744	0.73426271	0.391504958	0.964851606	Not Sig	2994	NA	NA	5	9	82990.6	0.428794078	13572.7	0.689189189
CALHM4	NW_005081642.1	420558	423552	Adult Male	AMV	Adult Male Brain	1.465652628	-0.731563296	2.839453217	0.052283776	0.819135939	0.896251247	Not Sig	8.954276963	-0.657363355	0.496952867	1.758603743	0.184798768	0.785629419	Not Sig	2994	NA	NA	5	9	82990.6	0.428794078	13572.7	0.689189189
CALHM4	NW_005081642.1	420558	423552	Nestling Female	Hyp	Nestling Female Brain	2.21590535	0.298860522	2.207027618	0.016612625	0.897444712	0.92231571	Not Sig	16.94395874	-1.37458996	0.820508995	2.721625671	0.098997142	0.731691361	Not Sig	2994	NA	NA	5	9	82990.6	0.428794078	13572.7	0.689189189
CALHM4	NW_005081642.1	420558	423552	Nestling Female	AMV	Nestling Female Brain	1.472528512	-1.057889011	3.020550457	0.161329185	0.687935705	100	Not Sig	4.392822244	-0.834109934	2.245787673	0.137944748	0.710332821	0.996634902	Not Sig	2994	NA	NA	5	9	82990.6	0.428794078	13572.7	0.689189189
CALHM4	NW_005081642.1	420558	423552	Nestling Male	Hyp	Nestling Male Brain	6.039640192	-1.605699932	1.263014083	1.008459901	0.315272082	0.516666111	Not Sig	23.62988844	-0.314371217	0.467317619	0.44944096	0.502600553	0.995064234	Not Sig	2994	NA	NA	5	9	82990.6	0.428794078	13572.7	0.689189189
CALHM4	NW_005081642.1	420558	423552	Nestling Male	AMV	Nestling Male Brain	1.604045369	-3.041321204	3.031073593	0.97696668	0.322948833	100	Not Sig	8.984356493	-1.857038997	0.978229197	3.269333854	0.07058628	0.590925556	Not Sig	2994	NA	NA	5	9	82990.6	0.428794078	13572.7	0.689189189
CALM2	NW_005081548.1	9193679	9202322	Adult Female	Hyp	Adult Female Brain	11397.87219	-0.348804082	0.032904972	112.0770605	3.44e-26	1.44e-24	Sig	131884.8568	-0.077087	0.065180182	1.40081816	0.236586632	0.998912819	Not Sig	8643	NA	NA	NA	27	97134.15	0.210111046	9974.355	0.95010395
CALM2	NW_005081548.1	9193679	9202322	Adult Female	AMV	Adult Female Brain	16550.48875	-0.24824146	0.028228291	77.22460227	1.53e-18	3.34e-17	Sig	191606.7393	0.035436225	0.08477613	0.174587694	0.676066353	0.992913561	Not Sig	8643	NA	NA	NA	27	97134.15	0.210111046	9974.355	0.95010395
CALM2	NW_005081548.1	9193679	9202322	Adult Male	Heart	Adult Male Horton et al	267.8358256	-0.440199578	0.168883346	6.528211908	0.010617664	0.02143354	Sig	NA	NA	NA	NA	NA	NA	NA	8643	NA	NA	NA	27	97134.15	0.210111046	9974.355	0.95010395
CALM2	NW_005081548.1	9193679	9202322	Adult Male	Liver	Adult Male Horton et al	264.8164776	0.238381386	0.357290154	0.388928108	0.532863373	0.670043973	Not Sig	NA	NA	NA	NA	NA	NA	NA	8643	NA	NA	NA	27	97134.15	0.210111046	9974.355	0.95010395
CALM2	NW_005081548.1	9193679	9202322	Adult Male	Hyp	Adult Male Brain	7281.29125	-0.293163997	0.031399972	86.97525149	1.1e-20	1.93e-19	Sig	100826.2076	-0.031727059	0.041602594	0.581813605	0.445602323	0.970132487	Not Sig	8643	NA	NA	NA	27	97134.15	0.210111046	9974.355	0.95010395
CALM2	NW_005081548.1	9193679	9202322	Adult Male	AMV	Adult Male Brain	9633.289865	-0.221122726	0.037176184	35.29643527	2.83e-09	1.83e-08	Sig	134583.2669	0.031732489	0.039757423	0.636792039	0.424874839	0.904482379	Not Sig	8643	NA	NA	NA	27	97134.15	0.210111046	9974.355	0.95010395
CALM2	NW_005081548.1	9193679	9202322	Nestling Female	Hyp	Nestling Female Brain	10907.22641	-0.168171639	0.022029635	58.23827227	2.32e-14	3.34e-13	Sig	124144.2643	0.045268608	0.100359975	0.203447216	0.651952623	0.991550631	Not Sig	8643	NA	NA	NA	27	97134.15	0.210111046	9974.355	0.95010395
CALM2	NW_005081548.1	9193679	9202322	Nestling Female	AMV	Nestling Female Brain	15300.64346	-0.298303057	0.030511293	95.37062593	1.58e-22	6.28e-21	Sig	162413.412	-0.06339582	0.121795665	0.271173155	0.602545893	0.996634902	Not Sig	8643	NA	NA	NA	27	97134.15	0.210111046	9974.355	0.95010395
CALM2	NW_005081548.1	9193679	9202322	Nestling Male	Hyp	Nestling Male Brain	10215.05695	-0.154733266	0.024557152	39.68380258	2.99e-10	5.1e-09	Sig	129906.6031	-0.046264856	0.12695332	0.132622382	0.715728409	1	Not Sig	8643	NA	NA	NA	27	97134.15	0.210111046	9974.355	0.95010395
CALM2	NW_005081548.1	9193679	9202322	Nestling Male	AMV	Nestling Male Brain	17647.25827	-0.259349943	0.030406382	72.65087716	1.55e-17	5.72e-16	Sig	169331.6269	0.133873399	0.130574082	1.056558411	0.304001446	0.78245467	Not Sig	8643	NA	NA	NA	27	97134.15	0.210111046	9974.355	0.95010395
CALML4	NW_005082517.1	30562	33411	Adult Female	Hyp	Adult Female Brain	NA	NA	NA	NA	NA	NA	NA	905.301238	0.397806547	0.24004798	2.715704284	0.099365106	0.94762906	Not Sig	NA	NA	NA	NA	0	NA	-1	NA	-1
CALML4	NW_005082517.1	30562	33411	Adult Female	AMV	Adult Female Brain	NA	NA	NA	NA	NA	NA	NA	794.3323268	0.341038724	0.239412998	2.010538342	0.156209879	0.834208368	Not Sig	NA	NA	NA	NA	0	NA	-1	NA	-1
CALML4	NW_005082517.1	30562	33411	Adult Male	Heart	Adult Male Horton et al	NA	NA	NA	NA	NA	NA	NA	NA	NA	NA	NA	NA	NA	NA	NA	NA	NA	NA	0	NA	-1	NA	-1
CALML4	NW_005082517.1	30562	33411	Adult Male	Liver	Adult Male Horton et al	NA	NA	NA	NA	NA	NA	NA	NA	NA	NA	NA	NA	NA	NA	NA	NA	NA	NA	0	NA	-1	NA	-1
CALML4	NW_005082517.1	30562	33411	Adult Male	Hyp	Adult Male Brain	NA	NA	NA	NA	NA	NA	NA	368.8037598	-0.016990241	0.189799614	0.008014831	0.928664219	0.992784155	Not Sig	NA	NA	NA	NA	0	NA	-1	NA	-1
CALML4	NW_005082517.1	30562	33411	Adult Male	AMV	Adult Male Brain	NA	NA	NA	NA	NA	NA	NA	340.0097637	0.129923903	0.233467595	0.3092566	0.578136724	0.940435221	Not Sig	NA	NA	NA	NA	0	NA	-1	NA	-1
CALML4	NW_005082517.1	30562	33411	Nestling Female	Hyp	Nestling Female Brain	NA	NA	NA	NA	NA	NA	NA	633.1106405	0.063509796	0.31221589	0.041380141	0.838805915	0.996728869	Not Sig	NA	NA	NA	NA	0	NA	-1	NA	-1
CALML4	NW_005082517.1	30562	33411	Nestling Female	AMV	Nestling Female Brain	NA	NA	NA	NA	NA	NA	NA	352.514804	0.397373047	0.333012213	1.411193543	0.234858359	0.996634902	Not Sig	NA	NA	NA	NA	0	NA	-1	NA	-1
CALML4	NW_005082517.1	30562	33411	Nestling Male	Hyp	Nestling Male Brain	NA	NA	NA	NA	NA	NA	NA	601.7592723	0.180668381	0.312777109	0.335299439	0.562555124	0.996116837	Not Sig	NA	NA	NA	NA	0	NA	-1	NA	-1
CALML4	NW_005082517.1	30562	33411	Nestling Male	AMV	Nestling Male Brain	NA	NA	NA	NA	NA	NA	NA	311.2810257	0.390656667	0.339310872	1.343364137	0.246441566	0.748177415	Not Sig	NA	NA	NA	NA	0	NA	-1	NA	-1
CAMKMT	NW_005081548.1	7486988	7690789	Adult Female	Hyp	Adult Female Brain	NA	NA	NA	NA	NA	NA	NA	711.0962423	-0.120713134	0.148689528	0.660478072	0.416391216	0.998912819	Not Sig	203801	NA	1	1	15	100375.7182	0.195508563	10570.89909	0.491898586
CAMKMT	NW_005081548.1	7486988	7690789	Adult Female	AMV	Adult Female Brain	NA	NA	NA	NA	NA	NA	NA	519.9945195	0.353177353	0.135552082	6.730993529	0.009475181	0.322628237	Not Sig	203801	NA	1	1	15	100375.7182	0.195508563	10570.89909	0.491898586
CAMKMT	NW_005081548.1	7486988	7690789	Adult Male	Heart	Adult Male Horton et al	6.94818579	2.845864498	0.49256385	28.90451732	7.6e-08	3.21e-07	Sig	NA	NA	NA	NA	NA	NA	NA	203801	NA	1	1	15	100375.7182	0.195508563	10570.89909	0.491898586
CAMKMT	NW_005081548.1	7486988	7690789	Adult Male	Liver	Adult Male Horton et al	12.63273015	3.187258602	0.461655571	39.37168201	3.5e-10	2.45e-09	Sig	NA	NA	NA	NA	NA	NA	NA	203801	NA	1	1	15	100375.7182	0.195508563	10570.89909	0.491898586
CAMKMT	NW_005081548.1	7486988	7690789	Adult Male	Hyp	Adult Male Brain	74.06234613	0.279427135	0.127405628	4.80591395	0.028362219	0.059674109	Not Sig	386.4184697	0.137159454	0.076671537	3.196601106	0.07379148	0.769131622	Not Sig	203801	NA	1	1	15	100375.7182	0.195508563	10570.89909	0.491898586
CAMKMT	NW_005081548.1	7486988	7690789	Adult Male	AMV	Adult Male Brain	54.34516416	0.499938496	0.164372418	9.17949717	0.002447413	0.00646463	Sig	270.339172	0.246684706	0.113863559	4.675562596	0.03059468	0.525165337	Not Sig	203801	NA	1	1	15	100375.7182	0.195508563	10570.89909	0.491898586
CAMKMT	NW_005081548.1	7486988	7690789	Nestling Female	Hyp	Nestling Female Brain	NA	NA	NA	NA	NA	NA	NA	856.0912805	0.13700147	0.077846789	3.095677766	0.078500456	0.680702466	Not Sig	203801	NA	1	1	15	100375.7182	0.195508563	10570.89909	0.491898586
CAMKMT	NW_005081548.1	7486988	7690789	Nestling Female	AMV	Nestling Female Brain	NA	NA	NA	NA	NA	NA	NA	523.6560037	0.27685886	0.144572285	3.648482161	0.056120334	0.996634902	Not Sig	203801	NA	1	1	15	100375.7182	0.195508563	10570.89909	0.491898586
CAMKMT	NW_005081548.1	7486988	7690789	Nestling Male	Hyp	Nestling Male Brain	NA	NA	NA	NA	NA	NA	NA	847.9352931	0.282066022	0.109418035	6.68342328	0.009731356	0.451817153	Not Sig	203801	NA	1	1	15	100375.7182	0.195508563	10570.89909	0.491898586
CAMKMT	NW_005081548.1	7486988	7690789	Nestling Male	AMV	Nestling Male Brain	NA	NA	NA	NA	NA	NA	NA	556.567413	0.448355274	0.139374269	10.48666341	0.001202393	0.208765512	Not Sig	203801	NA	1	1	15	100375.7182	0.195508563	10570.89909	0.491898586
CAPN11	NW_005081620.1	702426	715405	Adult Female	Hyp	Adult Female Brain	1867.878684	0.135225848	0.057493082	5.527430525	0.018720578	0.050709606	Not Sig	6404.587597	0.421252814	0.1382632	9.171377641	0.002458294	0.24257683	Not Sig	12979	NA	NA	NA	13	127037	0.042665108	20315.9	0.262474012
CAPN11	NW_005081620.1	702426	715405	Adult Female	AMV	Adult Female Brain	1507.507455	0.304840817	0.061857162	24.25205567	8.45e-07	5.31e-06	Sig	5187.350169	-0.165655501	0.177736605	0.871192666	0.35062534	0.936106402	Not Sig	12979	NA	NA	NA	13	127037	0.042665108	20315.9	0.262474012
CAPN11	NW_005081620.1	702426	715405	Adult Male	Heart	Adult Male Horton et al	587.0720078	-0.723285244	0.042566312	287.2515768	1.97e-64	8.13e-63	Sig	NA	NA	NA	NA	NA	NA	NA	12979	NA	NA	NA	13	127037	0.042665108	20315.9	0.262474012
CAPN11	NW_005081620.1	702426	715405	Adult Male	Liver	Adult Male Horton et al	133.3657614	0.041488263	0.089522763	0.212799418	0.644582041	0.76974192	Not Sig	NA	NA	NA	NA	NA	NA	NA	12979	NA	NA	NA	13	127037	0.042665108	20315.9	0.262474012
CAPN11	NW_005081620.1	702426	715405	Adult Male	Hyp	Adult Male Brain	637.8718047	0.335861223	0.045991619	53.31965031	2.83e-13	2.76e-12	Sig	2361.098572	0.109936187	0.099009342	1.230945876	0.267223166	0.949711687	Not Sig	12979	NA	NA	NA	13	127037	0.042665108	20315.9	0.262474012
CAPN11	NW_005081620.1	702426	715405	Adult Male	AMV	Adult Male Brain	583.1519523	0.444396475	0.049457868	80.72417082	2.6e-19	4.52e-18	Sig	2041.839348	0.355153368	0.108067243	10.73046123	0.001053862	0.090333728	Not Sig	12979	NA	NA	NA	13	127037	0.042665108	20315.9	0.262474012
CAPN11	NW_005081620.1	702426	715405	Nestling Female	Hyp	Nestling Female Brain	2379.842112	0.156570177	0.036576642	18.30749035	1.88e-05	8.29e-05	Sig	8460.091336	-0.314610316	0.177971343	3.118756214	0.077395839	0.676878334	Not Sig	12979	NA	NA	NA	13	127037	0.042665108	20315.9	0.262474012
CAPN11	NW_005081620.1	702426	715405	Nestling Female	AMV	Nestling Female Brain	2643.710867	0.063519193	0.061671727	1.057565073	0.303771193	0.456981373	Not Sig	8439.955549	0.33572575	0.147806935	5.121130545	0.023636213	0.996634902	Not Sig	12979	NA	NA	NA	13	127037	0.042665108	20315.9	0.262474012
CAPN11	NW_005081620.1	702426	715405	Nestling Male	Hyp	Nestling Male Brain	2927.165657	0.029311182	0.048119518	0.370601862	0.542676384	0.726004025	Not Sig	9390.360505	0.123129205	0.227826047	0.293038659	0.588279834	0.997652922	Not Sig	12979	NA	NA	NA	13	127037	0.042665108	20315.9	0.262474012
CAPN11	NW_005081620.1	702426	715405	Nestling Male	AMV	Nestling Male Brain	2844.469026	-0.11593305	0.065376402	3.136256676	0.076569356	0.161403836	Not Sig	7203.305301	0.831560766	0.154512975	29.55728892	5.43e-08	0.000103684	Sig	12979	NA	NA	NA	13	127037	0.042665108	20315.9	0.262474012
CAPN13	NW_005081602.1	139032	186751	Adult Female	Hyp	Adult Female Brain	1.736441786	0.037980421	2.996799969	0.000182317	0.989226909	1	Not Sig	6.534548888	0.839414695	0.911137266	0.829402582	0.362445335	0.998912819	Not Sig	47719	NA	3	2	24	NA	-1	NA	-1
CAPN13	NW_005081602.1	139032	186751	Adult Female	AMV	Adult Female Brain	0	NA	NA	NA	NA	100	Not Sig	1.392625452	-1.819036419	2.66357369	0.465706914	0.494968847	100	Not Sig	47719	NA	3	2	24	NA	-1	NA	-1
CAPN13	NW_005081602.1	139032	186751	Adult Male	Heart	Adult Male Horton et al	0.291201085	-0.354058657	2.953491444	0.024146694	0.876512238	100	Not Sig	NA	NA	NA	NA	NA	NA	NA	47719	NA	3	2	24	NA	-1	NA	-1
CAPN13	NW_005081602.1	139032	186751	Adult Male	Liver	Adult Male Horton et al	2.726337843	-0.41100344	2.938408151	0.02674691	0.870089482	0.922491358	Not Sig	NA	NA	NA	NA	NA	NA	NA	47719	NA	3	2	24	NA	-1	NA	-1
CAPN13	NW_005081602.1	139032	186751	Adult Male	Hyp	Adult Male Brain	0.304658115	-0.391298206	3.026690492	0.026598358	0.870447549	100	Not Sig	1.887324737	0.177546684	1.432801833	0.015385086	0.901286271	100	Not Sig	47719	NA	3	2	24	NA	-1	NA	-1
CAPN13	NW_005081602.1	139032	186751	Adult Male	AMV	Adult Male Brain	0.195916891	-0.389472663	3.02743915	0.0263668	0.871007746	100	Not Sig	1.239770344	-2.347930591	2.428047195	1.029006834	0.310392048	100	Not Sig	47719	NA	3	2	24	NA	-1	NA	-1
CAPN13	NW_005081602.1	139032	186751	Nestling Female	Hyp	Nestling Female Brain	4.650461484	-0.878130949	2.864223252	0.056221104	0.812571533	0.860711623	Not Sig	13.94686749	-0.897507131	0.550079547	2.658737003	0.102982477	0.737778282	Not Sig	47719	NA	3	2	24	NA	-1	NA	-1
CAPN13	NW_005081602.1	139032	186751	Nestling Female	AMV	Nestling Female Brain	1.224030131	-0.598636454	3.020721326	0.056664378	0.811847894	100	Not Sig	6.472615736	-0.948405601	1.062985971	0.800557912	0.370926615	0.996634902	Not Sig	47719	NA	3	2	24	NA	-1	NA	-1
CAPN13	NW_005081602.1	139032	186751	Nestling Male	Hyp	Nestling Male Brain	3.703583194	0.937476439	3.001484575	0.083276187	0.772905759	0.885297327	Not Sig	15.59528876	0.238955122	0.480867939	0.248878684	0.617865739	1	Not Sig	47719	NA	3	2	24	NA	-1	NA	-1
CAPN13	NW_005081602.1	139032	186751	Nestling Male	AMV	Nestling Male Brain	3.104612926	-0.785269208	2.808646151	0.106004396	0.744739752	0.845897892	Not Sig	11.03030708	-1.160828709	1.082962163	1.087802062	0.296958714	0.778802592	Not Sig	47719	NA	3	2	24	NA	-1	NA	-1
CAPN14	NW_005081602.1	316613	358877	Adult Female	Hyp	Adult Female Brain	5.743559585	0.245874788	1.320044334	0.015041153	0.902390296	0.956060686	Not Sig	21.09715343	-0.352378414	0.61383356	0.330774705	0.56520327	0.998912819	Not Sig	42264	NA	1	3	17	NA	-1	NA	-1
CAPN14	NW_005081602.1	316613	358877	Adult Female	AMV	Adult Female Brain	2.690981504	-1.582623921	2.168402547	0.49218588	0.48295385	0.641152578	Not Sig	15.48597011	-0.359016237	0.818982303	0.193223424	0.660247222	0.990552154	Not Sig	42264	NA	1	3	17	NA	-1	NA	-1
CAPN14	NW_005081602.1	316613	358877	Adult Male	Heart	Adult Male Horton et al	16.72030958	0.702447012	0.386382761	2.815267624	0.093371323	0.149567027	Not Sig	NA	NA	NA	NA	NA	NA	NA	42264	NA	1	3	17	NA	-1	NA	-1
CAPN14	NW_005081602.1	316613	358877	Adult Male	Liver	Adult Male Horton et al	10.01746813	-0.444124801	0.835589527	0.172729009	0.677697753	0.794250487	Not Sig	NA	NA	NA	NA	NA	NA	NA	42264	NA	1	3	17	NA	-1	NA	-1
CAPN14	NW_005081602.1	316613	358877	Adult Male	Hyp	Adult Male Brain	1.276977181	-1.208226306	2.987152249	0.161988369	0.687332433	0.801633835	Not Sig	6.730604147	-0.613458915	0.67425679	0.828533201	0.362697012	0.964851606	Not Sig	42264	NA	1	3	17	NA	-1	NA	-1
CAPN14	NW_005081602.1	316613	358877	Adult Male	AMV	Adult Male Brain	2.407280011	-3.501267602	1.720718579	2.436375468	0.118549868	0.19968303	Not Sig	9.139142874	-0.679912419	0.625161095	1.180917322	0.277169326	0.835353279	Not Sig	42264	NA	1	3	17	NA	-1	NA	-1
CAPN14	NW_005081602.1	316613	358877	Nestling Female	Hyp	Nestling Female Brain	10.71149581	0.076427861	0.823245674	0.005560891	0.940555745	0.956231674	Not Sig	30.16152152	0.099955365	0.33880902	0.087015931	0.768005622	0.996352332	Not Sig	42264	NA	1	3	17	NA	-1	NA	-1
CAPN14	NW_005081602.1	316613	358877	Nestling Female	AMV	Nestling Female Brain	5.335196977	-1.262378353	1.850124667	0.26360558	0.607653823	0.745167899	Not Sig	18.53548398	0.032234081	0.755771616	0.001909171	0.965148274	0.996634902	Not Sig	42264	NA	1	3	17	NA	-1	NA	-1
CAPN14	NW_005081602.1	316613	358877	Nestling Male	Hyp	Nestling Male Brain	7.754466477	-0.516977094	0.842134153	0.312482864	0.576160583	0.756903265	Not Sig	25.73781634	-0.095856467	0.357100423	0.071825083	0.788697764	1	Not Sig	42264	NA	1	3	17	NA	-1	NA	-1
CAPN14	NW_005081602.1	316613	358877	Nestling Male	AMV	Nestling Male Brain	5.740812502	-1.900668009	1.594266533	1.007217997	0.315570244	0.485312337	Not Sig	25.72184942	-0.250997746	0.463896704	0.289745124	0.590383907	0.894512289	Not Sig	42264	NA	1	3	17	NA	-1	NA	-1
CAPN2	NW_005081602.1	1762981	1787039	Adult Female	Hyp	Adult Female Brain	216.6808415	-0.227573088	0.169773564	1.781414555	0.181975723	0.323068387	Not Sig	595.1237734	-0.0659789	0.164024238	0.162111333	0.687220057	0.998912819	Not Sig	24058	NA	NA	3	3	NA	-1	NA	-1
CAPN2	NW_005081602.1	1762981	1787039	Adult Female	AMV	Adult Female Brain	108.643356	-1.904730008	0.292506946	38.79849728	4.7e-10	4.95e-09	Sig	405.3905097	-0.65809158	0.154247038	18.29465789	1.89e-05	0.005402719	Sig	24058	NA	NA	3	3	NA	-1	NA	-1
CAPN2	NW_005081602.1	1762981	1787039	Adult Male	Heart	Adult Male Horton et al	29.28705892	-1.145875951	0.231519646	22.51518507	2.08e-06	7.51e-06	Sig	NA	NA	NA	NA	NA	NA	NA	24058	NA	NA	3	3	NA	-1	NA	-1
CAPN2	NW_005081602.1	1762981	1787039	Adult Male	Liver	Adult Male Horton et al	18.30300682	-0.832911977	0.270256156	8.717594045	0.003151537	0.008111258	Sig	NA	NA	NA	NA	NA	NA	NA	24058	NA	NA	3	3	NA	-1	NA	-1
CAPN2	NW_005081602.1	1762981	1787039	Adult Male	Hyp	Adult Male Brain	84.93890616	0.019436452	0.151605972	0.016212892	0.898679332	0.936977856	Not Sig	314.0163965	-0.08758862	0.111105106	0.621979889	0.430312497	0.96600323	Not Sig	24058	NA	NA	3	3	NA	-1	NA	-1
CAPN2	NW_005081602.1	1762981	1787039	Adult Male	AMV	Adult Male Brain	43.42840292	-1.502266496	0.206753846	52.24790875	4.89e-13	4.78e-12	Sig	186.4961937	-0.480895927	0.209417284	5.284556846	0.021515367	0.468358185	Not Sig	24058	NA	NA	3	3	NA	-1	NA	-1
CAPN2	NW_005081602.1	1762981	1787039	Nestling Female	Hyp	Nestling Female Brain	303.0864697	-0.64885668	0.112801105	32.62520537	1.12e-08	7.94e-08	Sig	915.7469035	-0.105504024	0.143520341	0.540429072	0.46225496	0.974887283	Not Sig	24058	NA	NA	3	3	NA	-1	NA	-1
CAPN2	NW_005081602.1	1762981	1787039	Nestling Female	AMV	Nestling Female Brain	344.6456452	-1.191970042	0.160510119	53.07361	3.21e-13	5.54e-12	Sig	1150.641246	-0.359828313	0.168815341	4.556154591	0.032800641	0.996634902	Not Sig	24058	NA	NA	3	3	NA	-1	NA	-1
CAPN2	NW_005081602.1	1762981	1787039	Nestling Male	Hyp	Nestling Male Brain	265.941352	-0.504182148	0.150959272	10.99253142	0.000914798	0.004015558	Sig	1029.315151	-0.36574727	0.156939438	5.363893414	0.020557828	0.596903689	Not Sig	24058	NA	NA	3	3	NA	-1	NA	-1
CAPN2	NW_005081602.1	1762981	1787039	Nestling Male	AMV	Nestling Male Brain	386.7094721	-1.161003082	0.178679662	40.39771624	2.07e-10	3.76e-09	Sig	1391.107349	-0.504495053	0.179943208	7.669082343	0.005617502	0.420734369	Not Sig	24058	NA	NA	3	3	NA	-1	NA	-1
CAPN9	NW_005081653.1	943834	967324	Adult Female	Hyp	Adult Female Brain	0.386419989	-0.63283297	3.08876451	0.060905236	0.805070856	100	Not Sig	1.253159775	-1.275445097	3.012890296	0.177871755	0.673208636	100	Not Sig	23490	NA	2	5	13	89262.5	0.318234951	15031.05	0.550155925
CAPN9	NW_005081653.1	943834	967324	Adult Female	AMV	Adult Female Brain	0.928879753	-0.654320303	3.080894154	0.064681783	0.79924361	100	Not Sig	1.013323367	3.244293901	3.067622128	1.43779635	0.230496272	100	Not Sig	23490	NA	2	5	13	89262.5	0.318234951	15031.05	0.550155925
CAPN9	NW_005081653.1	943834	967324	Adult Male	Heart	Adult Male Horton et al	NA	NA	NA	NA	NA	NA	NA	NA	NA	NA	NA	NA	NA	NA	23490	NA	2	5	13	89262.5	0.318234951	15031.05	0.550155925
CAPN9	NW_005081653.1	943834	967324	Adult Male	Liver	Adult Male Horton et al	NA	NA	NA	NA	NA	NA	NA	NA	NA	NA	NA	NA	NA	NA	23490	NA	2	5	13	89262.5	0.318234951	15031.05	0.550155925
CAPN9	NW_005081653.1	943834	967324	Adult Male	Hyp	Adult Male Brain	NA	NA	NA	NA	NA	NA	NA	0.189525905	-0.932765428	3.037628191	0.269701495	0.603532082	100	Not Sig	23490	NA	2	5	13	89262.5	0.318234951	15031.05	0.550155925
CAPN9	NW_005081653.1	943834	967324	Adult Male	AMV	Adult Male Brain	NA	NA	NA	NA	NA	NA	NA	0.271423062	-1.622961663	3.025679489	0.611508563	0.434220374	100	Not Sig	23490	NA	2	5	13	89262.5	0.318234951	15031.05	0.550155925
CAPN9	NW_005081653.1	943834	967324	Nestling Female	Hyp	Nestling Female Brain	0.554746	-0.332981176	3.03931823	0.024636725	0.875275661	100	Not Sig	3.810204548	-3.727270183	2.018233901	2.996221344	0.08345896	0.692906926	Not Sig	23490	NA	2	5	13	89262.5	0.318234951	15031.05	0.550155925
CAPN9	NW_005081653.1	943834	967324	Nestling Female	AMV	Nestling Female Brain	0.982502136	-0.004582497	3.021861318	3.2e-06	0.998573298	100	Not Sig	3.47429645	-1.487689702	1.649344835	0.812689235	0.36732637	0.996634902	Not Sig	23490	NA	2	5	13	89262.5	0.318234951	15031.05	0.550155925
CAPN9	NW_005081653.1	943834	967324	Nestling Male	Hyp	Nestling Male Brain	0	NA	NA	NA	NA	100	Not Sig	2.683832566	-2.339876892	2.567000804	0.730134324	0.392839652	0.995064234	Not Sig	23490	NA	2	5	13	89262.5	0.318234951	15031.05	0.550155925
CAPN9	NW_005081653.1	943834	967324	Nestling Male	AMV	Nestling Male Brain	2.246110525	-0.902951465	2.858475218	0.103813878	0.747299964	0.846423495	Not Sig	4.397758378	0.073905038	1.625155121	0.002164934	0.962888741	0.998042131	Not Sig	23490	NA	2	5	13	89262.5	0.318234951	15031.05	0.550155925
CASP8AP2	NW_005081553.1	4635290	4654764	Adult Female	Hyp	Adult Female Brain	656.7735961	-0.123114648	0.094273457	1.702371303	0.191978154	0.337406421	Not Sig	3433.085257	0.022246854	0.099975475	0.049493976	0.823946144	0.998912819	Not Sig	19474	NA	3	4	0	62400.5	0.82368985	3807.88	0.561146052
CASP8AP2	NW_005081553.1	4635290	4654764	Adult Female	AMV	Adult Female Brain	629.5223821	-0.01067763	0.09807091	0.011835784	0.913367159	0.945044633	Not Sig	3476.004547	-0.002625009	0.079701132	0.001105123	0.973480497	0.997063119	Not Sig	19474	NA	3	4	0	62400.5	0.82368985	3807.88	0.561146052
CASP8AP2	NW_005081553.1	4635290	4654764	Adult Male	Heart	Adult Male Horton et al	167.3316183	-0.17453914	0.066585296	6.840123854	0.008913266	0.018489149	Sig	NA	NA	NA	NA	NA	NA	NA	19474	NA	3	4	0	62400.5	0.82368985	3807.88	0.561146052
CASP8AP2	NW_005081553.1	4635290	4654764	Adult Male	Liver	Adult Male Horton et al	163.2808686	-0.513133275	0.069391171	54.4258316	1.61e-13	1.52e-12	Sig	NA	NA	NA	NA	NA	NA	NA	19474	NA	3	4	0	62400.5	0.82368985	3807.88	0.561146052
CASP8AP2	NW_005081553.1	4635290	4654764	Adult Male	Hyp	Adult Male Brain	260.9144264	0.025109338	0.065884243	0.145185701	0.703179196	0.813800345	Not Sig	1598.521943	0.023704934	0.048941574	0.234539542	0.628178066	0.981669138	Not Sig	19474	NA	3	4	0	62400.5	0.82368985	3807.88	0.561146052
CASP8AP2	NW_005081553.1	4635290	4654764	Adult Male	AMV	Adult Male Brain	243.5753783	-0.013936975	0.088867846	0.024483876	0.875660008	0.917162014	Not Sig	1518.132647	-0.110271436	0.053272118	4.288767077	0.038364977	0.55329498	Not Sig	19474	NA	3	4	0	62400.5	0.82368985	3807.88	0.561146052
CASP8AP2	NW_005081553.1	4635290	4654764	Nestling Female	Hyp	Nestling Female Brain	397.4357227	0.105535358	0.087149752	1.460204634	0.226897564	0.33806433	Not Sig	2182.389851	-0.128363473	0.123871266	1.07368779	0.300113945	0.920503624	Not Sig	19474	NA	3	4	0	62400.5	0.82368985	3807.88	0.561146052
CASP8AP2	NW_005081553.1	4635290	4654764	Nestling Female	AMV	Nestling Female Brain	385.5314818	-0.057997106	0.110813543	0.272471325	0.601678784	0.740472701	Not Sig	1953.244572	-0.124947806	0.163821442	0.582737693	0.445241229	0.996634902	Not Sig	19474	NA	3	4	0	62400.5	0.82368985	3807.88	0.561146052
CASP8AP2	NW_005081553.1	4635290	4654764	Nestling Male	Hyp	Nestling Male Brain	444.5767263	-0.216156146	0.102823412	4.406901818	0.035793793	0.089117576	Not Sig	2498.178703	-0.141103886	0.122844143	1.313983605	0.251674667	0.995064234	Not Sig	19474	NA	3	4	0	62400.5	0.82368985	3807.88	0.561146052
CASP8AP2	NW_005081553.1	4635290	4654764	Nestling Male	AMV	Nestling Male Brain	430.7904807	-0.145342056	0.103682702	1.96161952	0.16134022	0.29713012	Not Sig	2145.733461	-0.294545833	0.1500504	3.803281729	0.051152234	0.557458649	Not Sig	19474	NA	3	4	0	62400.5	0.82368985	3807.88	0.561146052
CCDC167	NW_005081620.1	480360	493512	Adult Female	Hyp	Adult Female Brain	335.7756283	0.524058444	0.127765371	16.73437992	4.3e-05	0.000219357	Sig	568.8298182	0.057936403	0.150179888	0.148665887	0.699813558	0.998912819	Not Sig	13152	NA	1	1	14	119132	0.065848432	10787.3	0.376822917
CCDC167	NW_005081620.1	480360	493512	Adult Female	AMV	Adult Female Brain	359.894781	0.336042215	0.132102548	6.438968411	0.011164346	0.031471149	Sig	544.7703124	0.473244127	0.111419855	17.85904728	2.38e-05	0.0062692	Sig	13152	NA	1	1	14	119132	0.065848432	10787.3	0.376822917
CCDC167	NW_005081620.1	480360	493512	Adult Male	Heart	Adult Male Horton et al	57.431464	0.145966884	0.100090068	2.113885078	0.145968324	0.218252277	Not Sig	NA	NA	NA	NA	NA	NA	NA	13152	NA	1	1	14	119132	0.065848432	10787.3	0.376822917
CCDC167	NW_005081620.1	480360	493512	Adult Male	Liver	Adult Male Horton et al	92.74368357	-0.006869642	0.123391169	0.003030647	0.956097582	0.976773496	Not Sig	NA	NA	NA	NA	NA	NA	NA	13152	NA	1	1	14	119132	0.065848432	10787.3	0.376822917
CCDC167	NW_005081620.1	480360	493512	Adult Male	Hyp	Adult Male Brain	143.1459447	0.769524462	0.109913125	48.72433598	2.95e-12	2.69e-11	Sig	291.5744536	0.463610147	0.11134057	17.22838211	3.31e-05	0.004851637	Sig	13152	NA	1	1	14	119132	0.065848432	10787.3	0.376822917
CCDC167	NW_005081620.1	480360	493512	Adult Male	AMV	Adult Male Brain	123.5463219	0.624076394	0.132715447	21.81371948	3e-06	1.29e-05	Sig	249.2796665	0.533229258	0.132460245	16.06867943	6.11e-05	0.011589245	Sig	13152	NA	1	1	14	119132	0.065848432	10787.3	0.376822917
CCDC167	NW_005081620.1	480360	493512	Nestling Female	Hyp	Nestling Female Brain	378.372267	0.368095991	0.102365516	12.79193571	0.000348117	0.001167562	Sig	570.0416718	0.43243815	0.141276483	9.335247602	0.002247877	0.140540068	Not Sig	13152	NA	1	1	14	119132	0.065848432	10787.3	0.376822917
CCDC167	NW_005081620.1	480360	493512	Nestling Female	AMV	Nestling Female Brain	414.8793763	0.665130492	0.175653416	13.82520303	0.000200627	0.000855819	Sig	559.8820335	0.279401637	0.231844654	1.44317163	0.229626791	0.996634902	Not Sig	13152	NA	1	1	14	119132	0.065848432	10787.3	0.376822917
CCDC167	NW_005081620.1	480360	493512	Nestling Male	Hyp	Nestling Male Brain	355.7968683	0.527251331	0.119453563	19.33562559	1.1e-05	7.85e-05	Sig	557.0138692	0.377037573	0.111335818	11.55331915	0.000676284	0.123055741	Not Sig	13152	NA	1	1	14	119132	0.065848432	10787.3	0.376822917
CCDC167	NW_005081620.1	480360	493512	Nestling Male	AMV	Nestling Male Brain	388.9765431	0.619080105	0.185379387	10.78736843	0.001021951	0.004247867	Sig	511.0294454	0.551502244	0.261617068	4.514521586	0.033608284	0.535471317	Not Sig	13152	NA	1	1	14	119132	0.065848432	10787.3	0.376822917
CCDC170	NW_005081596.1	1679113	1714984	Adult Female	Hyp	Adult Female Brain	119.6408144	0.151597565	0.236832981	0.401634968	0.526246097	0.703670035	Not Sig	289.4518776	0.34184431	0.23646959	2.072920408	0.149934176	0.998912819	Not Sig	35871	NA	8	4	9	89207.13333	0.328982401	13103.83333	0.723839224
CCDC170	NW_005081596.1	1679113	1714984	Adult Female	AMV	Adult Female Brain	4.483208671	2.044283845	1.527069993	1.53331085	0.215616225	0.367574326	Not Sig	6.265302325	0.844920997	1.69638836	0.242144936	0.622661203	0.986738132	Not Sig	35871	NA	8	4	9	89207.13333	0.328982401	13103.83333	0.723839224
CCDC170	NW_005081596.1	1679113	1714984	Adult Male	Heart	Adult Male Horton et al	0.245590891	-0.167935784	2.956602287	0.005747197	0.939570047	100	Not Sig	NA	NA	NA	NA	NA	NA	NA	35871	NA	8	4	9	89207.13333	0.328982401	13103.83333	0.723839224
CCDC170	NW_005081596.1	1679113	1714984	Adult Male	Liver	Adult Male Horton et al	0.752621784	-0.168422884	2.956386465	0.005779064	0.939403061	100	Not Sig	NA	NA	NA	NA	NA	NA	NA	35871	NA	8	4	9	89207.13333	0.328982401	13103.83333	0.723839224
CCDC170	NW_005081596.1	1679113	1714984	Adult Male	Hyp	Adult Male Brain	37.69689024	0.236301307	0.184893267	1.628103598	0.201965548	0.317116055	Not Sig	106.5555673	0.141457772	0.124263437	1.294795899	0.255166005	0.947208594	Not Sig	35871	NA	8	4	9	89207.13333	0.328982401	13103.83333	0.723839224
CCDC170	NW_005081596.1	1679113	1714984	Adult Male	AMV	Adult Male Brain	0.682653191	-0.387216325	3.011660378	0.024749183	0.87499366	0.917162014	Not Sig	1.690523898	-0.331814607	1.867613006	0.031722706	0.858637617	0.984955789	Not Sig	35871	NA	8	4	9	89207.13333	0.328982401	13103.83333	0.723839224
CCDC170	NW_005081596.1	1679113	1714984	Nestling Female	Hyp	Nestling Female Brain	151.0486861	0.317518371	0.141684711	4.969661776	0.025795691	0.054370187	Not Sig	389.1218769	0.246999986	0.195101429	1.601770576	0.205652475	0.865301157	Not Sig	35871	NA	8	4	9	89207.13333	0.328982401	13103.83333	0.723839224
CCDC170	NW_005081596.1	1679113	1714984	Nestling Female	AMV	Nestling Female Brain	7.459123156	3.135586466	1.65000569	2.164012326	0.141275369	0.25220209	Not Sig	14.79857627	0.974803358	1.176076144	0.669565134	0.413203262	0.996634902	Not Sig	35871	NA	8	4	9	89207.13333	0.328982401	13103.83333	0.723839224
CCDC170	NW_005081596.1	1679113	1714984	Nestling Male	Hyp	Nestling Male Brain	118.9608984	0.215653537	0.203722603	1.107256605	0.29267908	0.491395138	Not Sig	412.4478407	-0.5316452	0.188718935	7.7902626	0.005252856	0.353656324	Not Sig	35871	NA	8	4	9	89207.13333	0.328982401	13103.83333	0.723839224
CCDC170	NW_005081596.1	1679113	1714984	Nestling Male	AMV	Nestling Male Brain	7.952771973	2.836066635	1.126982067	4.767923255	0.028994781	0.073038353	Not Sig	24.64732085	-0.567731128	0.615304731	0.830174883	0.362221965	0.810598102	Not Sig	35871	NA	8	4	9	89207.13333	0.328982401	13103.83333	0.723839224
CCDC28A	NW_005081611.1	3400870	3407340	Adult Female	Hyp	Adult Female Brain	980.7364383	-0.460875737	0.075287477	37.35301697	9.86e-10	1.2e-08	Sig	2513.25861	-0.161279595	0.109269873	2.184165544	0.139436617	0.995879656	Not Sig	6470	NA	2	1	2	91376	0.283070329	17317.8	0.388253638
CCDC28A	NW_005081611.1	3400870	3407340	Adult Female	AMV	Adult Female Brain	948.5757768	-0.446897651	0.07737579	33.26050339	8.06e-09	7.3e-08	Sig	2675.04273	-0.328279611	0.164087811	4.021220389	0.04493119	0.608647282	Not Sig	6470	NA	2	1	2	91376	0.283070329	17317.8	0.388253638
CCDC28A	NW_005081611.1	3400870	3407340	Adult Male	Heart	Adult Male Horton et al	73.07518093	-0.095497595	0.098119712	0.938550838	0.332650808	0.437964915	Not Sig	NA	NA	NA	NA	NA	NA	NA	6470	NA	2	1	2	91376	0.283070329	17317.8	0.388253638
CCDC28A	NW_005081611.1	3400870	3407340	Adult Male	Liver	Adult Male Horton et al	88.68860465	-0.336211432	0.098701148	11.48842012	0.000700311	0.00203355	Sig	NA	NA	NA	NA	NA	NA	NA	6470	NA	2	1	2	91376	0.283070329	17317.8	0.388253638
CCDC28A	NW_005081611.1	3400870	3407340	Adult Male	Hyp	Adult Male Brain	619.6823278	-0.142905345	0.047741038	8.953309125	0.002769674	0.007667624	Sig	1716.736045	-0.098422522	0.096148126	1.049022052	0.305732425	0.96020163	Not Sig	6470	NA	2	1	2	91376	0.283070329	17317.8	0.388253638
CCDC28A	NW_005081611.1	3400870	3407340	Adult Male	AMV	Adult Male Brain	506.8518163	-0.082456592	0.047840409	2.970213343	0.084810669	0.1511277	Not Sig	1826.48264	-0.283425686	0.168549984	2.832928433	0.092349822	0.68013344	Not Sig	6470	NA	2	1	2	91376	0.283070329	17317.8	0.388253638
CCDC28A	NW_005081611.1	3400870	3407340	Nestling Female	Hyp	Nestling Female Brain	864.1472972	-0.536763676	0.054599238	96.414224	9.32e-23	2.76e-21	Sig	2670.111227	-0.37166964	0.183970292	4.069946574	0.043652655	0.561449281	Not Sig	6470	NA	2	1	2	91376	0.283070329	17317.8	0.388253638
CCDC28A	NW_005081611.1	3400870	3407340	Nestling Female	AMV	Nestling Female Brain	956.8407654	-0.640821657	0.062399893	104.935987	1.26e-24	5.68e-23	Sig	2892.409005	0.176547469	0.266420834	0.437608418	0.508279035	0.996634902	Not Sig	6470	NA	2	1	2	91376	0.283070329	17317.8	0.388253638
CCDC28A	NW_005081611.1	3400870	3407340	Nestling Male	Hyp	Nestling Male Brain	828.424628	-0.593794477	0.084455985	49.05540283	2.49e-12	5.79e-11	Sig	2696.612803	-0.463960023	0.197190073	5.440231327	0.019678063	0.588355444	Not Sig	6470	NA	2	1	2	91376	0.283070329	17317.8	0.388253638
CCDC28A	NW_005081611.1	3400870	3407340	Nestling Male	AMV	Nestling Male Brain	1056.68913	-0.61944436	0.087325489	49.87242843	1.64e-12	3.54e-11	Sig	2905.186337	-0.021256999	0.248763279	0.007296453	0.931928067	0.990258637	Not Sig	6470	NA	2	1	2	91376	0.283070329	17317.8	0.388253638
CCDC85A	NW_005081577.1	2192906	2260589	Adult Female	Hyp	Adult Female Brain	526.916933	-0.181246412	0.131507987	1.877076338	0.170666813	0.307668646	Not Sig	2793.530174	0.01862693	0.106908583	0.030363248	0.861668573	0.998912819	Not Sig	67683	NA	NA	NA	22	85636.38	0.398012858	2783.788	0.768553459
CCDC85A	NW_005081577.1	2192906	2260589	Adult Female	AMV	Adult Female Brain	109.8973738	0.865945087	0.290239698	8.41945891	0.003712263	0.011830771	Sig	589.2994045	0.260918675	0.221741678	1.374831488	0.240983499	0.890256797	Not Sig	67683	NA	NA	NA	22	85636.38	0.398012858	2783.788	0.768553459
CCDC85A	NW_005081577.1	2192906	2260589	Adult Male	Heart	Adult Male Horton et al	34.03295388	-0.122892559	0.144677293	0.709941418	0.399463261	0.507394597	Not Sig	NA	NA	NA	NA	NA	NA	NA	67683	NA	NA	NA	22	85636.38	0.398012858	2783.788	0.768553459
CCDC85A	NW_005081577.1	2192906	2260589	Adult Male	Liver	Adult Male Horton et al	9.974547984	-0.113208286	0.541542275	0.031983004	0.858064964	0.92130228	Not Sig	NA	NA	NA	NA	NA	NA	NA	67683	NA	NA	NA	22	85636.38	0.398012858	2783.788	0.768553459
CCDC85A	NW_005081577.1	2192906	2260589	Adult Male	Hyp	Adult Male Brain	177.8260418	-0.006646502	0.090961583	0.0053241	0.94183283	0.964759627	Not Sig	1118.704245	-0.000202002	0.050828005	0.000820402	0.977149588	0.994897174	Not Sig	67683	NA	NA	NA	22	85636.38	0.398012858	2783.788	0.768553459
CCDC85A	NW_005081577.1	2192906	2260589	Adult Male	AMV	Adult Male Brain	44.39648905	0.526260079	0.254965061	4.036827593	0.044517433	0.084973056	Not Sig	278.79321	0.549079474	0.20756395	6.917981965	0.008533322	0.329289843	Not Sig	67683	NA	NA	NA	22	85636.38	0.398012858	2783.788	0.768553459
CCDC85A	NW_005081577.1	2192906	2260589	Nestling Female	Hyp	Nestling Female Brain	716.5581342	0.036298964	0.07131672	0.258093664	0.611432869	0.731655224	Not Sig	3609.796985	0.091094944	0.095117232	0.916928796	0.338282664	0.940391207	Not Sig	67683	NA	NA	NA	22	85636.38	0.398012858	2783.788	0.768553459
CCDC85A	NW_005081577.1	2192906	2260589	Nestling Female	AMV	Nestling Female Brain	219.0769294	0.037458305	0.146904878	0.064486851	0.799539893	0.885052181	Not Sig	998.8105128	0.331567849	0.277829942	1.414238255	0.234354091	0.996634902	Not Sig	67683	NA	NA	NA	22	85636.38	0.398012858	2783.788	0.768553459
CCDC85A	NW_005081577.1	2192906	2260589	Nestling Male	Hyp	Nestling Male Brain	681.870407	0.040235968	0.083400995	0.232379382	0.629765138	0.797605209	Not Sig	3929.721844	-0.023656838	0.098802104	0.057299041	0.810817	1	Not Sig	67683	NA	NA	NA	22	85636.38	0.398012858	2783.788	0.768553459
CCDC85A	NW_005081577.1	2192906	2260589	Nestling Male	AMV	Nestling Male Brain	243.5133594	-0.188394976	0.150800998	1.55038137	0.213079149	0.360944221	Not Sig	1082.817692	0.200308969	0.221655184	0.822478107	0.364456621	0.810598102	Not Sig	67683	NA	NA	NA	22	85636.38	0.398012858	2783.788	0.768553459
CCDC88A	NW_005081577.1	1897926	1932998	Adult Female	Hyp	Adult Female Brain	745.6664264	0.017708432	0.123931378	0.020144878	0.887133203	0.945615615	Not Sig	10441.81255	-0.075564397	0.106502681	0.504145648	0.477684202	0.998912819	Not Sig	35072	NA	1	1	60	148213	0.013637249	3789.936667	0.563475425
CCDC88A	NW_005081577.1	1897926	1932998	Adult Female	Hyp	Adult Female Brain	745.6664264	0.017708432	0.123931378	0.020144878	0.887133203	0.945615615	Not Sig	10441.81255	-0.075564397	0.106502681	0.504145648	0.477684202	0.998912819	Not Sig	35072	NA	1	2	60	148213	0.013637249	3789.936667	0.563475425
CCDC88A	NW_005081577.1	1897926	1932998	Adult Female	AMV	Adult Female Brain	630.9978472	0.0517798	0.101790269	0.258132992	0.611405725	0.747892653	Not Sig	9016.347712	0.095947986	0.128037087	0.560319531	0.454131527	0.962072467	Not Sig	35072	NA	1	1	60	148213	0.013637249	3789.936667	0.563475425
CCDC88A	NW_005081577.1	1897926	1932998	Adult Female	AMV	Adult Female Brain	630.9978472	0.0517798	0.101790269	0.258132992	0.611405725	0.747892653	Not Sig	9016.347712	0.095947986	0.128037087	0.560319531	0.454131527	0.962072467	Not Sig	35072	NA	1	2	60	148213	0.013637249	3789.936667	0.563475425
CCDC88A	NW_005081577.1	1897926	1932998	Adult Male	Heart	Adult Male Horton et al	17.08365981	-0.354737205	0.373751246	0.797312061	0.371898236	0.476580703	Not Sig	NA	NA	NA	NA	NA	NA	NA	35072	NA	1	1	60	148213	0.013637249	3789.936667	0.563475425
CCDC88A	NW_005081577.1	1897926	1932998	Adult Male	Heart	Adult Male Horton et al	17.08365981	-0.354737205	0.373751246	0.797312061	0.371898236	0.476580703	Not Sig	NA	NA	NA	NA	NA	NA	NA	35072	NA	1	2	60	148213	0.013637249	3789.936667	0.563475425
CCDC88A	NW_005081577.1	1897926	1932998	Adult Male	Liver	Adult Male Horton et al	25.90650985	-0.487735942	0.456824127	0.869460937	0.351104587	0.482411994	Not Sig	NA	NA	NA	NA	NA	NA	NA	35072	NA	1	1	60	148213	0.013637249	3789.936667	0.563475425
CCDC88A	NW_005081577.1	1897926	1932998	Adult Male	Liver	Adult Male Horton et al	25.90650985	-0.487735942	0.456824127	0.869460937	0.351104587	0.482411994	Not Sig	NA	NA	NA	NA	NA	NA	NA	35072	NA	1	2	60	148213	0.013637249	3789.936667	0.563475425
CCDC88A	NW_005081577.1	1897926	1932998	Adult Male	Hyp	Adult Male Brain	177.2889033	-0.018668489	0.090658508	0.042284452	0.837078507	0.905973858	Not Sig	2577.86039	-0.006119918	0.060835874	0.010254276	0.91934137	0.992784155	Not Sig	35072	NA	1	1	60	148213	0.013637249	3789.936667	0.563475425
CCDC88A	NW_005081577.1	1897926	1932998	Adult Male	Hyp	Adult Male Brain	177.2889033	-0.018668489	0.090658508	0.042284452	0.837078507	0.905973858	Not Sig	2577.86039	-0.006119918	0.060835874	0.010254276	0.91934137	0.992784155	Not Sig	35072	NA	1	2	60	148213	0.013637249	3789.936667	0.563475425
CCDC88A	NW_005081577.1	1897926	1932998	Adult Male	AMV	Adult Male Brain	135.5705382	0.046335671	0.105263263	0.193043618	0.660395422	0.796740036	Not Sig	2047.025788	-0.113551414	0.108127751	1.103882453	0.293415644	0.846809657	Not Sig	35072	NA	1	1	60	148213	0.013637249	3789.936667	0.563475425
CCDC88A	NW_005081577.1	1897926	1932998	Adult Male	AMV	Adult Male Brain	135.5705382	0.046335671	0.105263263	0.193043618	0.660395422	0.796740036	Not Sig	2047.025788	-0.113551414	0.108127751	1.103882453	0.293415644	0.846809657	Not Sig	35072	NA	1	2	60	148213	0.013637249	3789.936667	0.563475425
CCDC88A	NW_005081577.1	1897926	1932998	Nestling Female	Hyp	Nestling Female Brain	727.2786047	0.133595229	0.120428833	1.216777076	0.269994081	0.386184637	Not Sig	11458.41512	-0.114598808	0.14880006	0.593005762	0.441259157	0.972210088	Not Sig	35072	NA	1	1	60	148213	0.013637249	3789.936667	0.563475425
CCDC88A	NW_005081577.1	1897926	1932998	Nestling Female	Hyp	Nestling Female Brain	727.2786047	0.133595229	0.120428833	1.216777076	0.269994081	0.386184637	Not Sig	11458.41512	-0.114598808	0.14880006	0.593005762	0.441259157	0.972210088	Not Sig	35072	NA	1	2	60	148213	0.013637249	3789.936667	0.563475425
CCDC88A	NW_005081577.1	1897926	1932998	Nestling Female	AMV	Nestling Female Brain	798.2485096	0.111968362	0.153714113	0.516787292	0.472215359	0.624990916	Not Sig	12146.97323	-0.222126619	0.160607182	1.917503677	0.166132115	0.996634902	Not Sig	35072	NA	1	1	60	148213	0.013637249	3789.936667	0.563475425
CCDC88A	NW_005081577.1	1897926	1932998	Nestling Female	AMV	Nestling Female Brain	798.2485096	0.111968362	0.153714113	0.516787292	0.472215359	0.624990916	Not Sig	12146.97323	-0.222126619	0.160607182	1.917503677	0.166132115	0.996634902	Not Sig	35072	NA	1	2	60	148213	0.013637249	3789.936667	0.563475425
CCDC88A	NW_005081577.1	1897926	1932998	Nestling Male	Hyp	Nestling Male Brain	754.917392	-0.023108907	0.090484792	0.064966559	0.798811625	0.893018329	Not Sig	14156.53497	-0.309490246	0.154826829	3.953189549	0.046782616	0.760163492	Not Sig	35072	NA	1	1	60	148213	0.013637249	3789.936667	0.563475425
CCDC88A	NW_005081577.1	1897926	1932998	Nestling Male	Hyp	Nestling Male Brain	754.917392	-0.023108907	0.090484792	0.064966559	0.798811625	0.893018329	Not Sig	14156.53497	-0.309490246	0.154826829	3.953189549	0.046782616	0.760163492	Not Sig	35072	NA	1	2	60	148213	0.013637249	3789.936667	0.563475425
CCDC88A	NW_005081577.1	1897926	1932998	Nestling Male	AMV	Nestling Male Brain	754.9843123	0.092832957	0.113604209	0.662912398	0.415533636	0.59567495	Not Sig	13451.66263	-0.473754577	0.226861055	4.260239985	0.039014409	0.538875011	Not Sig	35072	NA	1	1	60	148213	0.013637249	3789.936667	0.563475425
CCDC88A	NW_005081577.1	1897926	1932998	Nestling Male	AMV	Nestling Male Brain	754.9843123	0.092832957	0.113604209	0.662912398	0.415533636	0.59567495	Not Sig	13451.66263	-0.473754577	0.226861055	4.260239985	0.039014409	0.538875011	Not Sig	35072	NA	1	2	60	148213	0.013637249	3789.936667	0.563475425
CCN2	NW_005081729.1	518681	520790	Adult Female	Hyp	Adult Female Brain	319.7021374	-0.414709313	0.13934467	8.799040721	0.00301389	0.010419731	Sig	3353.418024	-0.215757254	0.188497379	1.31498518	0.251494041	0.998912819	Not Sig	2109	NA	NA	NA	0	74623.95	0.606273135	10750.91	0.723665432
CCN2	NW_005081729.1	518681	520790	Adult Female	AMV	Adult Female Brain	540.5007973	-0.706951188	0.126223707	30.90570801	2.71e-08	2.19e-07	Sig	6530.358534	-0.46533016	0.157792582	8.744472785	0.003105419	0.170226632	Not Sig	2109	NA	NA	NA	0	74623.95	0.606273135	10750.91	0.723665432
CCN2	NW_005081729.1	518681	520790	Adult Male	Heart	Adult Male Horton et al	21.76451712	-0.950632522	0.243938803	14.1599774	0.000167904	0.000459611	Sig	NA	NA	NA	NA	NA	NA	NA	2109	NA	NA	NA	0	74623.95	0.606273135	10750.91	0.723665432
CCN2	NW_005081729.1	518681	520790	Adult Male	Liver	Adult Male Horton et al	5.590333864	-1.566017793	0.998316726	2.173396688	0.140415787	0.227301417	Not Sig	NA	NA	NA	NA	NA	NA	NA	2109	NA	NA	NA	0	74623.95	0.606273135	10750.91	0.723665432
CCN2	NW_005081729.1	518681	520790	Adult Male	Hyp	Adult Male Brain	114.0251561	-0.465900695	0.104727143	19.79706577	8.61e-06	3.62e-05	Sig	1248.223822	-0.179171413	0.137016357	1.712659877	0.190640628	0.916417239	Not Sig	2109	NA	NA	NA	0	74623.95	0.606273135	10750.91	0.723665432
CCN2	NW_005081729.1	518681	520790	Adult Male	AMV	Adult Male Brain	244.93009	-1.620794671	0.187520951	69.97656087	6e-17	8.84e-16	Sig	2874.726468	-0.472159692	0.14696755	10.335581	0.0013049	0.101461356	Not Sig	2109	NA	NA	NA	0	74623.95	0.606273135	10750.91	0.723665432
CCN2	NW_005081729.1	518681	520790	Nestling Female	Hyp	Nestling Female Brain	231.9917283	-0.398309667	0.122060694	10.52892626	0.001175205	0.003501975	Sig	2239.797489	0.016109703	0.23311003	0.004776469	0.944900469	0.996896415	Not Sig	2109	NA	NA	NA	0	74623.95	0.606273135	10750.91	0.723665432
CCN2	NW_005081729.1	518681	520790	Nestling Female	AMV	Nestling Female Brain	363.4860599	-0.782947723	0.162454229	22.54191492	2.06e-06	1.31e-05	Sig	3891.336978	-0.546304142	0.217188931	6.342136289	0.01179028	0.970101733	Not Sig	2109	NA	NA	NA	0	74623.95	0.606273135	10750.91	0.723665432
CCN2	NW_005081729.1	518681	520790	Nestling Male	Hyp	Nestling Male Brain	308.526778	-0.285875905	0.163892818	2.980198777	0.08428892	0.180997622	Not Sig	2932.02457	0.174437116	0.372500987	0.220273397	0.638831682	1	Not Sig	2109	NA	NA	NA	0	74623.95	0.606273135	10750.91	0.723665432
CCN2	NW_005081729.1	518681	520790	Nestling Male	AMV	Nestling Male Brain	421.2582718	-0.903742247	0.174584163	25.88044372	3.63e-07	3.69e-06	Sig	3806.207649	-0.111654582	0.227049916	0.24066927	0.62372315	0.906694845	Not Sig	2109	NA	NA	NA	0	74623.95	0.606273135	10750.91	0.723665432
CCN6	NW_005081561.1	298730	306411	Adult Female	Hyp	Adult Female Brain	0	NA	NA	NA	NA	100	Not Sig	1.10585527	-3.754527253	3.043576442	1.974732643	0.159946413	100	Not Sig	7681	NA	2	3	16	88673.3	0.323397623	9232.685	0.606510416
CCN6	NW_005081561.1	298730	306411	Adult Female	AMV	Adult Female Brain	1.107818663	-2.394965185	3.059776204	0.671715516	0.412454139	100	Not Sig	2.782897252	0.98072248	2.530791922	0.145003666	0.703356505	100	Not Sig	7681	NA	2	3	16	88673.3	0.323397623	9232.685	0.606510416
CCN6	NW_005081561.1	298730	306411	Adult Male	Heart	Adult Male Horton et al	0	NA	NA	NA	NA	100	Not Sig	NA	NA	NA	NA	NA	NA	NA	7681	NA	2	3	16	88673.3	0.323397623	9232.685	0.606510416
CCN6	NW_005081561.1	298730	306411	Adult Male	Liver	Adult Male Horton et al	0.194176393	-0.35147757	2.954543124	0.023816407	0.877352971	100	Not Sig	NA	NA	NA	NA	NA	NA	NA	7681	NA	2	3	16	88673.3	0.323397623	9232.685	0.606510416
CCN6	NW_005081561.1	298730	306411	Adult Male	Hyp	Adult Male Brain	0.152798672	-0.382407627	3.030361735	0.025476346	0.873185848	100	Not Sig	0.544431548	-1.7825479	2.983670039	0.492724757	0.482714364	100	Not Sig	7681	NA	2	3	16	88673.3	0.323397623	9232.685	0.606510416
CCN6	NW_005081561.1	298730	306411	Adult Male	AMV	Adult Male Brain	0.186931716	0.382369453	3.030361675	0.025473157	0.873193719	100	Not Sig	0.504188204	0.960226378	3.02104013	0.123387552	0.725389068	100	Not Sig	7681	NA	2	3	16	88673.3	0.323397623	9232.685	0.606510416
CCN6	NW_005081561.1	298730	306411	Nestling Female	Hyp	Nestling Female Brain	6.839085385	-0.463566742	1.159004232	0.073609558	0.78615199	0.851240609	Not Sig	21.00723646	-0.780378852	0.736606438	1.109786819	0.292128294	0.917724814	Not Sig	7681	NA	2	3	16	88673.3	0.323397623	9232.685	0.606510416
CCN6	NW_005081561.1	298730	306411	Nestling Female	AMV	Nestling Female Brain	6.691034052	-1.63469541	1.139490331	1.182949948	0.276756262	0.427526464	Not Sig	11.17089817	0.280314957	0.807527733	0.120735263	0.728238402	0.996634902	Not Sig	7681	NA	2	3	16	88673.3	0.323397623	9232.685	0.606510416
CCN6	NW_005081561.1	298730	306411	Nestling Male	Hyp	Nestling Male Brain	6.585487521	0.234260786	2.929867418	0.000433627	0.983386286	0.991755352	Not Sig	17.94744314	0.005120627	0.711032126	8.63e-05	0.992587365	1	Not Sig	7681	NA	2	3	16	88673.3	0.323397623	9232.685	0.606510416
CCN6	NW_005081561.1	298730	306411	Nestling Male	AMV	Nestling Male Brain	2.788737045	3.637010586	2.560709507	1.501010607	0.220515929	0.370509718	Not Sig	7.938564349	-1.148690607	1.117613395	1.001264697	0.317004682	0.78614981	Not Sig	7681	NA	2	3	16	88673.3	0.323397623	9232.685	0.606510416
CCNC	NW_005081553.1	8712118	8727618	Adult Female	Hyp	Adult Female Brain	339.0342501	-0.006825706	0.13189986	0.00267049	0.958786238	0.982274741	Not Sig	NA	NA	NA	NA	NA	NA	NA	NA	NA	NA	NA	40	177419	0.003896357	2816.895	0.761006289
CCNC	NW_005081553.1	8712118	8727618	Adult Female	AMV	Adult Female Brain	284.4183436	0.075461335	0.164885304	0.207163906	0.648999445	0.776197555	Not Sig	NA	NA	NA	NA	NA	NA	NA	NA	NA	NA	NA	40	177419	0.003896357	2816.895	0.761006289
CCNC	NW_005081553.1	8712118	8727618	Adult Male	Heart	Adult Male Horton et al	34.4762397	-0.226515338	0.213755471	1.054017055	0.304583734	0.404708033	Not Sig	NA	NA	NA	NA	NA	NA	NA	NA	NA	NA	NA	40	177419	0.003896357	2816.895	0.761006289
CCNC	NW_005081553.1	8712118	8727618	Adult Male	Liver	Adult Male Horton et al	79.17685753	-0.346480478	0.214088438	2.439092851	0.118344647	0.197231552	Not Sig	NA	NA	NA	NA	NA	NA	NA	NA	NA	NA	NA	40	177419	0.003896357	2816.895	0.761006289
CCNC	NW_005081553.1	8712118	8727618	Adult Male	Hyp	Adult Male Brain	175.3664129	0.079272937	0.131919302	0.354361547	0.551654488	0.687607252	Not Sig	1816.051261	0.188588006	0.082102234	5.262482729	0.021789914	0.48021681	Not Sig	NA	NA	NA	NA	40	177419	0.003896357	2816.895	0.761006289
CCNC	NW_005081553.1	8712118	8727618	Adult Male	AMV	Adult Male Brain	130.2811244	-0.051242718	0.10757664	0.225948068	0.634544688	0.768210352	Not Sig	1356.203426	0.196829257	0.104325646	3.549625195	0.059558902	0.618937992	Not Sig	NA	NA	NA	NA	40	177419	0.003896357	2816.895	0.761006289
CCNC	NW_005081553.1	8712118	8727618	Nestling Female	Hyp	Nestling Female Brain	365.8620937	0.303439226	0.097973612	9.51392113	0.00203919	0.005699837	Sig	NA	NA	NA	NA	NA	NA	NA	NA	NA	NA	NA	40	177419	0.003896357	2816.895	0.761006289
CCNC	NW_005081553.1	8712118	8727618	Nestling Female	AMV	Nestling Female Brain	297.5889246	0.451423759	0.141474158	10.04608867	0.001526718	0.005180828	Sig	NA	NA	NA	NA	NA	NA	NA	NA	NA	NA	NA	40	177419	0.003896357	2816.895	0.761006289
CCNC	NW_005081553.1	8712118	8727618	Nestling Male	Hyp	Nestling Male Brain	330.105438	0.375432593	0.136550273	7.475172176	0.006255558	0.020409926	Sig	NA	NA	NA	NA	NA	NA	NA	NA	NA	NA	NA	40	177419	0.003896357	2816.895	0.761006289
CCNC	NW_005081553.1	8712118	8727618	Nestling Male	AMV	Nestling Male Brain	363.8864092	0.108213903	0.13054868	0.683076714	0.408529278	0.592168434	Not Sig	NA	NA	NA	NA	NA	NA	NA	NA	NA	NA	NA	40	177419	0.003896357	2816.895	0.761006289
CCR6	NW_005081574.1	753056	765468	Adult Female	Hyp	Adult Female Brain	54.60741058	1.759394205	0.468893794	12.15134513	0.000490525	0.001952809	Sig	119.5070295	1.079846537	0.242031782	19.34328512	1.09e-05	0.004330662	Sig	12412	NA	2	3	19	78483.5	0.522891097	11425.75	0.606957077
CCR6	NW_005081574.1	753056	765468	Adult Female	AMV	Adult Female Brain	43.65908911	1.868385127	0.431468004	16.83885698	4.07e-05	0.000191679	Sig	93.78732439	1.214994482	0.213339329	31.69574227	1.8e-08	1.77e-05	Sig	12412	NA	2	3	19	78483.5	0.522891097	11425.75	0.606957077
CCR6	NW_005081574.1	753056	765468	Adult Male	Heart	Adult Male Horton et al	8.946288603	1.208163505	0.440233399	6.521920759	0.010655287	0.021434472	Sig	NA	NA	NA	NA	NA	NA	NA	12412	NA	2	3	19	78483.5	0.522891097	11425.75	0.606957077
CCR6	NW_005081574.1	753056	765468	Adult Male	Liver	Adult Male Horton et al	7.14674426	0.358092748	0.797411317	0.137122755	0.711158305	0.824319298	Not Sig	NA	NA	NA	NA	NA	NA	NA	12412	NA	2	3	19	78483.5	0.522891097	11425.75	0.606957077
CCR6	NW_005081574.1	753056	765468	Adult Male	Hyp	Adult Male Brain	24.45557061	1.365011226	0.248557568	30.20098754	3.9e-08	2.29e-07	Sig	74.6471479	0.481583415	0.200359855	5.724638836	0.016728477	0.433181032	Not Sig	12412	NA	2	3	19	78483.5	0.522891097	11425.75	0.606957077
CCR6	NW_005081574.1	753056	765468	Adult Male	AMV	Adult Male Brain	21.68225222	1.277212811	0.376603897	10.46081499	0.001219335	0.003419368	Sig	57.76852337	0.777925659	0.217502838	12.6236616	0.000380894	0.043759718	Sig	12412	NA	2	3	19	78483.5	0.522891097	11425.75	0.606957077
CCR6	NW_005081574.1	753056	765468	Nestling Female	Hyp	Nestling Female Brain	31.00776655	2.394693513	0.368589909	39.32113969	3.6e-10	3.01e-09	Sig	61.94113692	1.308659748	0.281372888	21.21646378	4.1e-06	0.002070613	Sig	12412	NA	2	3	19	78483.5	0.522891097	11425.75	0.606957077
CCR6	NW_005081574.1	753056	765468	Nestling Female	AMV	Nestling Female Brain	18.96131467	4.096649142	0.83983841	17.92650694	2.3e-05	0.000119416	Sig	39.17602511	1.558184939	0.683037177	4.909459912	0.026709992	0.996634902	Not Sig	12412	NA	2	3	19	78483.5	0.522891097	11425.75	0.606957077
CCR6	NW_005081574.1	753056	765468	Nestling Male	Hyp	Nestling Male Brain	31.02523258	3.344692452	0.526569985	35.73643758	2.26e-09	3.29e-08	Sig	67.56357375	1.50064364	0.432036013	12.10679583	0.000502384	0.097729565	Not Sig	12412	NA	2	3	19	78483.5	0.522891097	11425.75	0.606957077
CCR6	NW_005081574.1	753056	765468	Nestling Male	AMV	Nestling Male Brain	28.73469643	5.075372166	0.916521366	17.16320539	3.43e-05	0.000220511	Sig	45.53532682	1.526678756	0.556397184	7.67659604	0.005594159	0.420734369	Not Sig	12412	NA	2	3	19	78483.5	0.522891097	11425.75	0.606957077
CCSAP	NW_005081653.1	426044	439822	Adult Female	Hyp	Adult Female Brain	2360.240713	-0.097215154	0.053965754	3.242150338	0.071766388	0.153618073	Not Sig	7719.011874	0.208830795	0.256561153	0.659059125	0.416892304	0.998912819	Not Sig	13778	NA	NA	NA	17	94490.5	0.241768946	13601.8	0.685031185
CCSAP	NW_005081653.1	426044	439822	Adult Female	AMV	Adult Female Brain	6704.74201	-0.079716077	0.040099135	3.94821899	0.046921003	0.107908259	Not Sig	17064.09685	0.444496355	0.622364301	0.503410367	0.478005457	0.964345	Not Sig	13778	NA	NA	NA	17	94490.5	0.241768946	13601.8	0.685031185
CCSAP	NW_005081653.1	426044	439822	Adult Male	Heart	Adult Male Horton et al	34.91148708	-0.2293621	0.142552863	2.551364071	0.110199075	0.172372875	Not Sig	NA	NA	NA	NA	NA	NA	NA	13778	NA	NA	NA	17	94490.5	0.241768946	13601.8	0.685031185
CCSAP	NW_005081653.1	426044	439822	Adult Male	Liver	Adult Male Horton et al	65.77775963	0.121260541	0.109407189	1.214896471	0.270364552	0.396127151	Not Sig	NA	NA	NA	NA	NA	NA	NA	13778	NA	NA	NA	17	94490.5	0.241768946	13601.8	0.685031185
CCSAP	NW_005081653.1	426044	439822	Adult Male	Hyp	Adult Male Brain	981.2550691	-0.025894475	0.036138087	0.513316367	0.473706739	0.611459497	Not Sig	3691.939673	0.038215809	0.050263608	0.578025242	0.447087406	0.970132487	Not Sig	13778	NA	NA	NA	17	94490.5	0.241768946	13601.8	0.685031185
CCSAP	NW_005081653.1	426044	439822	Adult Male	AMV	Adult Male Brain	2256.429931	-0.063309852	0.03136533	4.072438353	0.043588311	0.083504346	Not Sig	8484.160606	-0.106455762	0.105383998	1.021480871	0.312168	0.858302888	Not Sig	13778	NA	NA	NA	17	94490.5	0.241768946	13601.8	0.685031185
CCSAP	NW_005081653.1	426044	439822	Nestling Female	Hyp	Nestling Female Brain	1472.302437	0.117037128	0.046892114	6.22092262	0.012624931	0.028647819	Sig	4848.085693	0.206389211	0.145781641	2.002666689	0.157022743	0.814685178	Not Sig	13778	NA	NA	NA	17	94490.5	0.241768946	13601.8	0.685031185
CCSAP	NW_005081653.1	426044	439822	Nestling Female	AMV	Nestling Female Brain	2437.672734	0.069804544	0.061822255	1.27120717	0.259540338	0.407624051	Not Sig	5736.939436	0.658433017	0.445978621	2.139660487	0.143533654	0.996634902	Not Sig	13778	NA	NA	NA	17	94490.5	0.241768946	13601.8	0.685031185
CCSAP	NW_005081653.1	426044	439822	Nestling Male	Hyp	Nestling Male Brain	1547.76293	0.194440261	0.054778091	12.58816796	0.000388196	0.001877428	Sig	4431.618159	0.472586387	0.375089897	1.602151021	0.205598646	0.987419244	Not Sig	13778	NA	NA	NA	17	94490.5	0.241768946	13601.8	0.685031185
CCSAP	NW_005081653.1	426044	439822	Nestling Male	AMV	Nestling Male Brain	2566.172232	0.002657411	0.05526541	0.002308924	0.96167539	0.985848682	Not Sig	5064.271731	-0.669882363	0.46062572	2.04141525	0.153067178	0.681244803	Not Sig	13778	NA	NA	NA	17	94490.5	0.241768946	13601.8	0.685031185
CCT4	NW_005081577.1	4037880	4043197	Adult Female	Hyp	Adult Female Brain	2448.078496	-0.114766724	0.048448392	5.609441142	0.017863959	0.048893285	Sig	15400.69704	-0.111712778	0.076723752	2.124406304	0.144968944	0.998912819	Not Sig	5317	NA	1	2	10	58302.25	0.870933178	3969.095	0.526205451
CCT4	NW_005081577.1	4037880	4043197	Adult Female	AMV	Adult Female Brain	1979.288945	-0.088292869	0.055125808	2.564325566	0.109299162	0.21682044	Not Sig	12170.29913	-0.054746187	0.078973074	0.481105664	0.487921922	0.967023817	Not Sig	5317	NA	1	2	10	58302.25	0.870933178	3969.095	0.526205451
CCT4	NW_005081577.1	4037880	4043197	Adult Male	Heart	Adult Male Horton et al	161.6149231	-0.165811666	0.088283291	3.482391105	0.062025056	0.104380688	Not Sig	NA	NA	NA	NA	NA	NA	NA	5317	NA	1	2	10	58302.25	0.870933178	3969.095	0.526205451
CCT4	NW_005081577.1	4037880	4043197	Adult Male	Liver	Adult Male Horton et al	273.0372225	-0.396437352	0.062138139	40.46367095	2e-10	1.47e-09	Sig	NA	NA	NA	NA	NA	NA	NA	5317	NA	1	2	10	58302.25	0.870933178	3969.095	0.526205451
CCT4	NW_005081577.1	4037880	4043197	Adult Male	Hyp	Adult Male Brain	826.5865025	-0.104256236	0.042658509	5.96871448	0.014561893	0.03335674	Sig	5897.814858	-0.097281561	0.063914042	2.318994364	0.127802626	0.872764365	Not Sig	5317	NA	1	2	10	58302.25	0.870933178	3969.095	0.526205451
CCT4	NW_005081577.1	4037880	4043197	Adult Male	AMV	Adult Male Brain	646.4918878	-0.127732996	0.050596672	6.366210008	0.011631375	0.026108194	Sig	4349.930999	-0.008833887	0.059882607	0.021771402	0.88269685	0.987795363	Not Sig	5317	NA	1	2	10	58302.25	0.870933178	3969.095	0.526205451
CCT4	NW_005081577.1	4037880	4043197	Nestling Female	Hyp	Nestling Female Brain	2253.952362	-0.002500742	0.041525088	0.003622205	0.952008483	0.964094528	Not Sig	14397.97922	-0.114260018	0.098520045	1.344649483	0.246215684	0.886025665	Not Sig	5317	NA	1	2	10	58302.25	0.870933178	3969.095	0.526205451
CCT4	NW_005081577.1	4037880	4043197	Nestling Female	AMV	Nestling Female Brain	2657.697372	-0.212403102	0.055816228	14.44051114	0.000144657	0.000631729	Sig	16146.43004	-0.074219978	0.151267345	0.240979903	0.623499272	0.996634902	Not Sig	5317	NA	1	2	10	58302.25	0.870933178	3969.095	0.526205451
CCT4	NW_005081577.1	4037880	4043197	Nestling Male	Hyp	Nestling Male Brain	2325.567036	-0.078670124	0.052606504	2.233010244	0.135090428	0.267974298	Not Sig	15129.68373	-0.030251855	0.094651669	0.102060305	0.749371058	1	Not Sig	5317	NA	1	2	10	58302.25	0.870933178	3969.095	0.526205451
CCT4	NW_005081577.1	4037880	4043197	Nestling Male	AMV	Nestling Male Brain	2678.276957	-0.145772191	0.057670675	6.378897845	0.011548513	0.033764719	Sig	15239.44804	-0.018070985	0.100889138	0.032059802	0.857896469	0.97226302	Not Sig	5317	NA	1	2	10	58302.25	0.870933178	3969.095	0.526205451
CD109	NW_005081654.1	977479	1047341	Adult Female	Hyp	Adult Female Brain	781.4046082	1.039826658	0.135955246	56.34262592	6.09e-14	1.18e-12	Sig	2108.519311	0.905418032	0.178560323	24.8686718	6.14e-07	0.000473244	Sig	69862	NA	7	8	29	54324.86	0.927021235	3303.074	0.663871418
CD109	NW_005081654.1	977479	1047341	Adult Female	AMV	Adult Female Brain	831.034932	2.322259311	0.119999021	346.4430606	2.52e-77	6.77e-75	Sig	1634.612536	1.751071596	0.261664908	40.98125191	1.54e-10	3.01e-07	Sig	69862	NA	7	8	29	54324.86	0.927021235	3303.074	0.663871418
CD109	NW_005081654.1	977479	1047341	Adult Male	Heart	Adult Male Horton et al	29.78637881	0.222694953	0.163228768	1.816714574	0.177704848	0.257478549	Not Sig	NA	NA	NA	NA	NA	NA	NA	69862	NA	7	8	29	54324.86	0.927021235	3303.074	0.663871418
CD109	NW_005081654.1	977479	1047341	Adult Male	Liver	Adult Male Horton et al	3.236522582	-0.186514541	2.113024088	0.006562112	0.935436492	0.968863219	Not Sig	NA	NA	NA	NA	NA	NA	NA	69862	NA	7	8	29	54324.86	0.927021235	3303.074	0.663871418
CD109	NW_005081654.1	977479	1047341	Adult Male	Hyp	Adult Male Brain	266.2706237	0.832906096	0.234438072	11.88550057	0.000565726	0.001818946	Sig	779.6546339	0.626979731	0.135968987	20.96606187	4.67e-06	0.000942546	Sig	69862	NA	7	8	29	54324.86	0.927021235	3303.074	0.663871418
CD109	NW_005081654.1	977479	1047341	Adult Male	AMV	Adult Male Brain	246.8574455	2.146908319	0.137579347	229.131059	9.22e-52	5.67e-50	Sig	576.1380047	1.759139514	0.199076441	72.67129083	1.53e-17	2.42e-14	Sig	69862	NA	7	8	29	54324.86	0.927021235	3303.074	0.663871418
CD109	NW_005081654.1	977479	1047341	Nestling Female	Hyp	Nestling Female Brain	417.6383901	0.612606494	0.091092625	44.83347614	2.15e-11	2.16e-10	Sig	1244.736627	0.26162994	0.253240887	1.066152145	0.301816205	0.921966686	Not Sig	69862	NA	7	8	29	54324.86	0.927021235	3303.074	0.663871418
CD109	NW_005081654.1	977479	1047341	Nestling Female	AMV	Nestling Female Brain	253.371207	0.964873313	0.252655282	13.55779388	0.000231329	0.000965425	Sig	647.489593	0.463471802	0.32648998	1.993961364	0.1579273	0.996634902	Not Sig	69862	NA	7	8	29	54324.86	0.927021235	3303.074	0.663871418
CD109	NW_005081654.1	977479	1047341	Nestling Male	Hyp	Nestling Male Brain	434.0575318	0.748084646	0.143308417	26.57147533	2.54e-07	2.52e-06	Sig	1503.200671	0.028451822	0.230556438	0.015250278	0.901717496	1	Not Sig	69862	NA	7	8	29	54324.86	0.927021235	3303.074	0.663871418
CD109	NW_005081654.1	977479	1047341	Nestling Male	AMV	Nestling Male Brain	371.772984	1.220034613	0.231538352	25.83764883	3.71e-07	3.7e-06	Sig	885.1280788	0.551271846	0.26652842	4.350114053	0.037006468	0.538875011	Not Sig	69862	NA	7	8	29	54324.86	0.927021235	3303.074	0.663871418
CD164	NW_005081561.1	1463258	1471520	Adult Female	Hyp	Adult Female Brain	999.1348384	-0.515762539	0.078887298	42.5399313	6.93e-11	9.84e-10	Sig	5537.849642	-0.238727905	0.104479486	5.240562892	0.022066133	0.646155968	Not Sig	8262	NA	NA	1	29	105302	0.132086499	27643.4	0.094074844
CD164	NW_005081561.1	1463258	1471520	Adult Female	AMV	Adult Female Brain	1658.547478	-0.303873223	0.059006317	26.48341261	2.66e-07	1.83e-06	Sig	8500.65705	0.030135482	0.101711202	0.087728371	0.767085172	0.992913561	Not Sig	8262	NA	NA	1	29	105302	0.132086499	27643.4	0.094074844
CD164	NW_005081561.1	1463258	1471520	Adult Male	Heart	Adult Male Horton et al	366.1404978	-1.546155729	0.069432666	481.3878765	1.07e-106	1.15e-104	Sig	NA	NA	NA	NA	NA	NA	NA	8262	NA	NA	1	29	105302	0.132086499	27643.4	0.094074844
CD164	NW_005081561.1	1463258	1471520	Adult Male	Liver	Adult Male Horton et al	1432.272686	-0.276436493	0.072516779	14.33703618	0.000152828	0.00049861	Sig	NA	NA	NA	NA	NA	NA	NA	8262	NA	NA	1	29	105302	0.132086499	27643.4	0.094074844
CD164	NW_005081561.1	1463258	1471520	Adult Male	Hyp	Adult Male Brain	441.5100764	-0.486860828	0.057404853	71.88199763	2.28e-17	3.25e-16	Sig	2784.253842	-0.106595685	0.063981477	2.778543716	0.095535	0.824903945	Not Sig	8262	NA	NA	1	29	105302	0.132086499	27643.4	0.094074844
CD164	NW_005081561.1	1463258	1471520	Adult Male	AMV	Adult Male Brain	729.7582707	-0.251824799	0.050747822	24.5884789	7.1e-07	3.37e-06	Sig	4677.687029	-0.088699709	0.077905385	1.29734686	0.254698419	0.821419721	Not Sig	8262	NA	NA	1	29	105302	0.132086499	27643.4	0.094074844
CD164	NW_005081561.1	1463258	1471520	Nestling Female	Hyp	Nestling Female Brain	934.8165754	-0.587025829	0.055323263	112.179875	3.26e-26	1.21e-24	Sig	5464.241535	-0.237861486	0.110255795	4.649427613	0.031063904	0.49243869	Not Sig	8262	NA	NA	1	29	105302	0.132086499	27643.4	0.094074844
CD164	NW_005081561.1	1463258	1471520	Nestling Female	AMV	Nestling Female Brain	765.2558991	-0.664602725	0.086699308	58.21651899	2.35e-14	4.42e-13	Sig	4161.201826	-0.193337338	0.157625655	1.50791525	0.219457477	0.996634902	Not Sig	8262	NA	NA	1	29	105302	0.132086499	27643.4	0.094074844
CD164	NW_005081561.1	1463258	1471520	Nestling Male	Hyp	Nestling Male Brain	1122.953243	-0.516634267	0.093591837	30.08439671	4.14e-08	4.75e-07	Sig	6366.245957	-0.017112352	0.120136952	0.020284952	0.886744119	1	Not Sig	8262	NA	NA	1	29	105302	0.132086499	27643.4	0.094074844
CD164	NW_005081561.1	1463258	1471520	Nestling Male	AMV	Nestling Male Brain	877.5118197	-0.690070204	0.090442038	57.66434625	3.11e-14	7.48e-13	Sig	5158.69749	-0.338113811	0.124513828	7.259748591	0.007051716	0.447958874	Not Sig	8262	NA	NA	1	29	105302	0.132086499	27643.4	0.094074844
CD24	NW_005081708.1	1048028	1052754	Adult Female	Hyp	Adult Female Brain	0	NA	NA	NA	NA	100	Not Sig	14730.64417	0.068484839	0.166993235	0.16793205	0.681956238	0.998912819	Not Sig	NA	NA	NA	NA	0	NA	-1	NA	-1
CD24	NW_005081708.1	1048028	1052754	Adult Female	AMV	Adult Female Brain	0	NA	NA	NA	NA	100	Not Sig	3814.418731	0.581071504	0.309568051	3.458284475	0.06293558	0.660549815	Not Sig	NA	NA	NA	NA	0	NA	-1	NA	-1
CD24	NW_005081708.1	1048028	1052754	Adult Male	Heart	Adult Male Horton et al	NA	NA	NA	NA	NA	NA	NA	NA	NA	NA	NA	NA	NA	NA	NA	NA	NA	NA	0	NA	-1	NA	-1
CD24	NW_005081708.1	1048028	1052754	Adult Male	Liver	Adult Male Horton et al	NA	NA	NA	NA	NA	NA	NA	NA	NA	NA	NA	NA	NA	NA	NA	NA	NA	NA	0	NA	-1	NA	-1
CD24	NW_005081708.1	1048028	1052754	Adult Male	Hyp	Adult Male Brain	NA	NA	NA	NA	NA	NA	NA	7567.377765	-0.058237024	0.063397876	0.844395564	0.358142656	0.964851606	Not Sig	NA	NA	NA	NA	0	NA	-1	NA	-1
CD24	NW_005081708.1	1048028	1052754	Adult Male	AMV	Adult Male Brain	NA	NA	NA	NA	NA	NA	NA	1613.397408	-0.378856978	0.215077779	3.108140761	0.07790184	0.66058718	Not Sig	NA	NA	NA	NA	0	NA	-1	NA	-1
CD24	NW_005081708.1	1048028	1052754	Nestling Female	Hyp	Nestling Female Brain	0	NA	NA	NA	NA	100	Not Sig	14465.90624	-0.006527063	0.180466365	0.00130822	0.971147343	0.996952305	Not Sig	NA	NA	NA	NA	0	NA	-1	NA	-1
CD24	NW_005081708.1	1048028	1052754	Nestling Female	AMV	Nestling Female Brain	0.1559761	-0.439113983	3.04656794	0.032451875	0.857039489	100	Not Sig	5800.511849	0.197010415	0.292473582	0.452035155	0.501370073	0.996634902	Not Sig	NA	NA	NA	NA	0	NA	-1	NA	-1
CD24	NW_005081708.1	1048028	1052754	Nestling Male	Hyp	Nestling Male Brain	0	NA	NA	NA	NA	100	Not Sig	17547.95065	0.088022458	0.158105628	0.310693525	0.577254922	0.996116837	Not Sig	NA	NA	NA	NA	0	NA	-1	NA	-1
CD24	NW_005081708.1	1048028	1052754	Nestling Male	AMV	Nestling Male Brain	0	NA	NA	NA	NA	100	Not Sig	6766.435711	0.038404801	0.292384984	0.017278814	0.895420206	0.980514966	Not Sig	NA	NA	NA	NA	0	NA	-1	NA	-1
CD2AP	NW_005081561.1	2753670	2831484	Adult Female	Hyp	Adult Female Brain	417.1840971	-0.125352595	0.127452335	0.961692784	0.32676075	0.514110102	Not Sig	2186.165293	-0.21983281	0.089297516	6.081740406	0.013658614	0.54166162	Not Sig	77814	NA	1	3	6	74594.62	0.611299435	13786.66	0.166041667
CD2AP	NW_005081561.1	2753670	2831484	Adult Female	AMV	Adult Female Brain	424.8326767	-0.320831729	0.131933216	5.867337392	0.015424364	0.040802382	Sig	1967.763644	-0.02522097	0.089463445	0.079540605	0.777920937	0.992913561	Not Sig	77814	NA	1	3	6	74594.62	0.611299435	13786.66	0.166041667
CD2AP	NW_005081561.1	2753670	2831484	Adult Male	Heart	Adult Male Horton et al	140.7310681	-0.373839312	0.081684831	20.77237973	5.17e-06	1.73e-05	Sig	NA	NA	NA	NA	NA	NA	NA	77814	NA	1	3	6	74594.62	0.611299435	13786.66	0.166041667
CD2AP	NW_005081561.1	2753670	2831484	Adult Male	Liver	Adult Male Horton et al	249.5235893	-0.660980998	0.064775783	103.3349012	2.83e-24	5.56e-23	Sig	NA	NA	NA	NA	NA	NA	NA	77814	NA	1	3	6	74594.62	0.611299435	13786.66	0.166041667
CD2AP	NW_005081561.1	2753670	2831484	Adult Male	Hyp	Adult Male Brain	199.9816094	-0.126287033	0.096602326	1.699568708	0.19234439	0.304323204	Not Sig	1069.189663	-0.060621025	0.070733318	0.73516125	0.391215325	0.964851606	Not Sig	77814	NA	1	3	6	74594.62	0.611299435	13786.66	0.166041667
CD2AP	NW_005081561.1	2753670	2831484	Adult Male	AMV	Adult Male Brain	187.862951	-0.172903645	0.096406268	3.202654749	0.073518841	0.133046208	Not Sig	960.0891646	-0.131281292	0.071510123	3.372699298	0.066285068	0.630069076	Not Sig	77814	NA	1	3	6	74594.62	0.611299435	13786.66	0.166041667
CD2AP	NW_005081561.1	2753670	2831484	Nestling Female	Hyp	Nestling Female Brain	453.9489838	0.481519963	0.085644728	31.38177932	2.12e-08	1.47e-07	Sig	2093.053715	0.050331118	0.100673432	0.249925203	0.617127749	0.98605262	Not Sig	77814	NA	1	3	6	74594.62	0.611299435	13786.66	0.166041667
CD2AP	NW_005081561.1	2753670	2831484	Nestling Female	AMV	Nestling Female Brain	376.9887088	0.160464872	0.114220975	1.962129449	0.161285761	0.280555903	Not Sig	1502.771623	0.18647791	0.157508531	1.397535495	0.237136645	0.996634902	Not Sig	77814	NA	1	3	6	74594.62	0.611299435	13786.66	0.166041667
CD2AP	NW_005081561.1	2753670	2831484	Nestling Male	Hyp	Nestling Male Brain	515.5127302	0.102616822	0.106649571	0.920828	0.33725766	0.543691184	Not Sig	2486.110294	-0.041158808	0.136696697	0.090588499	0.76343033	1	Not Sig	77814	NA	1	3	6	74594.62	0.611299435	13786.66	0.166041667
CD2AP	NW_005081561.1	2753670	2831484	Nestling Male	AMV	Nestling Male Brain	421.286543	0.24809799	0.12310241	4.036722371	0.044520209	0.103314834	Not Sig	1821.976005	0.013903156	0.144691216	0.009252862	0.923368245	0.987702365	Not Sig	77814	NA	1	3	6	74594.62	0.611299435	13786.66	0.166041667
CDC40	NW_005081561.1	1146994	1175121	Adult Female	Hyp	Adult Female Brain	608.7281182	0.002000397	0.101818326	0.000384541	0.984354705	0.998606945	Not Sig	2316.710826	-0.155415544	0.071274052	4.765361993	0.029037952	0.688566656	Not Sig	28127	NA	NA	4	15	64242.8	0.80654588	7583.835	0.848177083
CDC40	NW_005081561.1	1146994	1175121	Adult Female	AMV	Adult Female Brain	858.1469844	-0.116842415	0.091947247	1.609999026	0.204491939	0.354805077	Not Sig	3750.329087	-0.428708225	0.141110383	9.279287862	0.002317595	0.143064523	Not Sig	28127	NA	NA	4	15	64242.8	0.80654588	7583.835	0.848177083
CDC40	NW_005081561.1	1146994	1175121	Adult Male	Heart	Adult Male Horton et al	159.2650403	-0.235816351	0.070859907	11.01387897	0.000904322	0.002215973	Sig	NA	NA	NA	NA	NA	NA	NA	28127	NA	NA	4	15	64242.8	0.80654588	7583.835	0.848177083
CDC40	NW_005081561.1	1146994	1175121	Adult Male	Liver	Adult Male Horton et al	150.5639478	0.171139969	0.085942746	3.926331139	0.047535543	0.092127372	Not Sig	NA	NA	NA	NA	NA	NA	NA	28127	NA	NA	4	15	64242.8	0.80654588	7583.835	0.848177083
CDC40	NW_005081561.1	1146994	1175121	Adult Male	Hyp	Adult Male Brain	322.5692576	-0.153454741	0.07212087	4.515566873	0.033587754	0.069555743	Not Sig	1176.94794	-0.051547189	0.052488575	0.967300276	0.325354407	0.96020163	Not Sig	28127	NA	NA	4	15	64242.8	0.80654588	7583.835	0.848177083
CDC40	NW_005081561.1	1146994	1175121	Adult Male	AMV	Adult Male Brain	442.7010063	-0.200422055	0.069422796	8.305240866	0.003953084	0.009963677	Sig	1640.90704	-0.034076164	0.084511443	0.162694973	0.686687344	0.959696801	Not Sig	28127	NA	NA	4	15	64242.8	0.80654588	7583.835	0.848177083
CDC40	NW_005081561.1	1146994	1175121	Nestling Female	Hyp	Nestling Female Brain	523.0702526	-0.02699632	0.066491476	0.164705237	0.684860953	0.786522764	Not Sig	2029.400682	-0.090799336	0.064566802	1.977159394	0.159689979	0.81576297	Not Sig	28127	NA	NA	4	15	64242.8	0.80654588	7583.835	0.848177083
CDC40	NW_005081561.1	1146994	1175121	Nestling Female	AMV	Nestling Female Brain	654.4324897	-0.502407661	0.102722935	23.68257516	1.14e-06	7.59e-06	Sig	2311.741676	-0.054209572	0.112367546	0.232961783	0.629336354	0.996634902	Not Sig	28127	NA	NA	4	15	64242.8	0.80654588	7583.835	0.848177083
CDC40	NW_005081561.1	1146994	1175121	Nestling Male	Hyp	Nestling Male Brain	563.5216272	-0.111867569	0.106390749	1.098680457	0.294555871	0.493031497	Not Sig	2229.825437	-0.045255102	0.071599264	0.398989324	0.527611674	0.995064234	Not Sig	28127	NA	NA	4	15	64242.8	0.80654588	7583.835	0.848177083
CDC40	NW_005081561.1	1146994	1175121	Nestling Male	AMV	Nestling Male Brain	736.8507699	-0.46442094	0.116922363	15.59198759	7.86e-05	0.000456952	Sig	2577.854589	-0.018610722	0.151450197	0.015093069	0.902222829	0.981709544	Not Sig	28127	NA	NA	4	15	64242.8	0.80654588	7583.835	0.848177083
CDC42BPA	NW_005081602.1	529240	712881	Adult Female	Hyp	Adult Female Brain	4449.47708	-0.338825395	0.041977665	65.00580538	7.47e-16	1.74e-14	Sig	19475.33448	-0.148430623	0.08665187	2.942031284	0.086302141	0.939420196	Not Sig	183641	NA	2	7	13	NA	-1	NA	-1
CDC42BPA	NW_005081602.1	529240	712881	Adult Female	AMV	Adult Female Brain	3898.863689	-0.302390919	0.049555034	37.134826	1.1e-09	1.14e-08	Sig	16292.90309	-0.07369273	0.101674196	0.526062668	0.468266916	0.963105262	Not Sig	183641	NA	2	7	13	NA	-1	NA	-1
CDC42BPA	NW_005081602.1	529240	712881	Adult Male	Heart	Adult Male Horton et al	3312.599432	-0.038274228	0.034681352	1.215053322	0.270333629	0.367670737	Not Sig	NA	NA	NA	NA	NA	NA	NA	183641	NA	2	7	13	NA	-1	NA	-1
CDC42BPA	NW_005081602.1	529240	712881	Adult Male	Liver	Adult Male Horton et al	984.8953747	-0.240225542	0.038441249	38.94813574	4.35e-10	2.99e-09	Sig	NA	NA	NA	NA	NA	NA	NA	183641	NA	2	7	13	NA	-1	NA	-1
CDC42BPA	NW_005081602.1	529240	712881	Adult Male	Hyp	Adult Male Brain	1570.613384	-0.334843535	0.039570298	71.4594969	2.83e-17	3.97e-16	Sig	7535.586927	-0.128788672	0.033081552	15.17402713	9.8e-05	0.01169119	Sig	183641	NA	2	7	13	NA	-1	NA	-1
CDC42BPA	NW_005081602.1	529240	712881	Adult Male	AMV	Adult Male Brain	1244.1355	-0.214499403	0.039688069	29.18319438	6.58e-08	3.68e-07	Sig	5912.931191	-0.20919595	0.054821465	14.58396452	0.00013405	0.021771463	Sig	183641	NA	2	7	13	NA	-1	NA	-1
CDC42BPA	NW_005081602.1	529240	712881	Nestling Female	Hyp	Nestling Female Brain	4251.632061	-0.209030603	0.029700394	49.49042837	1.99e-12	2.27e-11	Sig	18732.9541	-0.16989001	0.101270764	2.812775805	0.093516436	0.717833293	Not Sig	183641	NA	2	7	13	NA	-1	NA	-1
CDC42BPA	NW_005081602.1	529240	712881	Nestling Female	AMV	Nestling Female Brain	3814.481186	-0.257391129	0.045385692	32.08958175	1.47e-08	1.34e-07	Sig	15674.02132	-0.350637873	0.330220757	1.13082681	0.287599048	0.996634902	Not Sig	183641	NA	2	7	13	NA	-1	NA	-1
CDC42BPA	NW_005081602.1	529240	712881	Nestling Male	Hyp	Nestling Male Brain	4356.038687	-0.180038793	0.054908956	10.70655855	0.001067564	0.004557999	Sig	21903.02455	-0.313570785	0.143119078	4.748293813	0.029327359	0.654140571	Not Sig	183641	NA	2	7	13	NA	-1	NA	-1
CDC42BPA	NW_005081602.1	529240	712881	Nestling Male	AMV	Nestling Male Brain	4126.286913	-0.173587819	0.062767517	7.624249187	0.005758864	0.019289399	Sig	19110.76402	-0.440748372	0.185702493	5.513313797	0.018872258	0.496865707	Not Sig	183641	NA	2	7	13	NA	-1	NA	-1
CDC42EP3	NW_005081574.1	4710595	4737195	Adult Female	Hyp	Adult Female Brain	554.1694604	0.060220417	0.102184823	0.346636476	0.556023343	0.735995634	Not Sig	2438.646044	-0.08198772	0.090822444	0.816411826	0.366231357	0.998912819	Not Sig	26600	NA	NA	1	19	73688.4	0.630820183	9000.115	0.644791667
CDC42EP3	NW_005081574.1	4710595	4737195	Adult Female	AMV	Adult Female Brain	419.1608794	-0.280561805	0.121221572	5.33715479	0.020875518	0.053128688	Not Sig	1788.172305	-0.033636123	0.095577355	0.123963205	0.724775201	0.992913561	Not Sig	26600	NA	NA	1	19	73688.4	0.630820183	9000.115	0.644791667
CDC42EP3	NW_005081574.1	4710595	4737195	Adult Male	Heart	Adult Male Horton et al	250.0077504	-0.124587296	0.059819466	4.318846781	0.037692459	0.067086372	Not Sig	NA	NA	NA	NA	NA	NA	NA	26600	NA	NA	1	19	73688.4	0.630820183	9000.115	0.644791667
CDC42EP3	NW_005081574.1	4710595	4737195	Adult Male	Liver	Adult Male Horton et al	80.50138838	0.73065411	0.381196526	2.795376033	0.094536586	0.164708073	Not Sig	NA	NA	NA	NA	NA	NA	NA	26600	NA	NA	1	19	73688.4	0.630820183	9000.115	0.644791667
CDC42EP3	NW_005081574.1	4710595	4737195	Adult Male	Hyp	Adult Male Brain	323.6890442	-0.013030778	0.059626235	0.047739908	0.827043733	0.900672886	Not Sig	1477.101155	0.007211297	0.057984329	0.016069549	0.899125825	0.992784155	Not Sig	26600	NA	NA	1	19	73688.4	0.630820183	9000.115	0.644791667
CDC42EP3	NW_005081574.1	4710595	4737195	Adult Male	AMV	Adult Male Brain	208.5610346	-0.333977001	0.084400228	15.62168456	7.74e-05	0.00026273	Sig	859.2736061	-0.467864115	0.640240712	0.534726346	0.464626555	0.915175217	Not Sig	26600	NA	NA	1	19	73688.4	0.630820183	9000.115	0.644791667
CDC42EP3	NW_005081574.1	4710595	4737195	Nestling Female	Hyp	Nestling Female Brain	465.9775149	0.225879836	0.076281551	8.742929676	0.003108048	0.008306818	Sig	1877.006867	0.173973515	0.11906143	2.133972552	0.144066962	0.800353132	Not Sig	26600	NA	NA	1	19	73688.4	0.630820183	9000.115	0.644791667
CDC42EP3	NW_005081574.1	4710595	4737195	Nestling Female	AMV	Nestling Female Brain	519.405235	-0.103415614	0.113526499	0.823089334	0.364278463	0.521477468	Not Sig	2189.919914	-0.06293791	0.170536816	0.136309233	0.711978057	0.996634902	Not Sig	26600	NA	NA	1	19	73688.4	0.630820183	9000.115	0.644791667
CDC42EP3	NW_005081574.1	4710595	4737195	Nestling Male	Hyp	Nestling Male Brain	488.3664922	0.058000452	0.102185346	0.321161713	0.570910333	0.750908536	Not Sig	1988.170876	0.210952337	0.135913106	2.42135192	0.119691595	0.944510351	Not Sig	26600	NA	NA	1	19	73688.4	0.630820183	9000.115	0.644791667
CDC42EP3	NW_005081574.1	4710595	4737195	Nestling Male	AMV	Nestling Male Brain	542.6539883	-0.129334462	0.124707319	1.066554663	0.301724964	0.466794228	Not Sig	2112.455441	0.126304458	0.155765442	0.66048333	0.416389361	0.832333289	Not Sig	26600	NA	NA	1	19	73688.4	0.630820183	9000.115	0.644791667
CDC5L	NW_005081635.1	1046331	1079821	Adult Female	Hyp	Adult Female Brain	NA	NA	NA	NA	NA	NA	NA	7403.723045	0.036598532	0.062087561	0.34718577	0.555710537	0.998912819	Not Sig	NA	NA	NA	NA	0	NA	-1	NA	-1
CDC5L	NW_005081635.1	1046331	1079821	Adult Female	AMV	Adult Female Brain	NA	NA	NA	NA	NA	NA	NA	6571.406929	0.002716734	0.064339238	0.001801858	0.966141329	0.997063119	Not Sig	NA	NA	NA	NA	0	NA	-1	NA	-1
CDC5L	NW_005081635.1	1046331	1079821	Adult Male	Heart	Adult Male Horton et al	NA	NA	NA	NA	NA	NA	NA	NA	NA	NA	NA	NA	NA	NA	NA	NA	NA	NA	0	NA	-1	NA	-1
CDC5L	NW_005081635.1	1046331	1079821	Adult Male	Liver	Adult Male Horton et al	NA	NA	NA	NA	NA	NA	NA	NA	NA	NA	NA	NA	NA	NA	NA	NA	NA	NA	0	NA	-1	NA	-1
CDC5L	NW_005081635.1	1046331	1079821	Adult Male	Hyp	Adult Male Brain	NA	NA	NA	NA	NA	NA	NA	3235.829016	0.03839918	0.038474987	0.995934431	0.31829626	0.96020163	Not Sig	NA	NA	NA	NA	0	NA	-1	NA	-1
CDC5L	NW_005081635.1	1046331	1079821	Adult Male	AMV	Adult Male Brain	NA	NA	NA	NA	NA	NA	NA	2672.280924	0.001993371	0.044017624	0.002719218	0.95841226	0.994087908	Not Sig	NA	NA	NA	NA	0	NA	-1	NA	-1
CDC5L	NW_005081635.1	1046331	1079821	Nestling Female	Hyp	Nestling Female Brain	NA	NA	NA	NA	NA	NA	NA	5888.810813	-0.001071504	0.054626027	0.000405694	0.983930214	0.998146184	Not Sig	NA	NA	NA	NA	0	NA	-1	NA	-1
CDC5L	NW_005081635.1	1046331	1079821	Nestling Female	AMV	Nestling Female Brain	NA	NA	NA	NA	NA	NA	NA	5868.157422	0.011002472	0.073891666	0.022225385	0.881489083	0.996634902	Not Sig	NA	NA	NA	NA	0	NA	-1	NA	-1
CDC5L	NW_005081635.1	1046331	1079821	Nestling Male	Hyp	Nestling Male Brain	NA	NA	NA	NA	NA	NA	NA	6306.494184	0.061265269	0.054897601	1.247390269	0.264051508	0.995064234	Not Sig	NA	NA	NA	NA	0	NA	-1	NA	-1
CDC5L	NW_005081635.1	1046331	1079821	Nestling Male	AMV	Nestling Male Brain	NA	NA	NA	NA	NA	NA	NA	5984.484008	0.039332726	0.058505335	0.452658265	0.501075282	0.864610659	Not Sig	NA	NA	NA	NA	0	NA	-1	NA	-1
CDK19	NW_005081561.1	861477	997367	Adult Female	Hyp	Adult Female Brain	879.5346019	0.064822272	0.095703703	0.456597631	0.499218383	0.679635389	Not Sig	3696.628729	-0.080445946	0.091000562	0.782662999	0.376327936	0.998912819	Not Sig	135890	NA	NA	2	21	75130.6	0.598814394	11864.82857	0.359668752
CDK19	NW_005081561.1	861477	997367	Adult Female	AMV	Adult Female Brain	1398.500906	0.141085402	0.076962415	3.350587223	0.067181044	0.145762507	Not Sig	5431.989395	0.121276512	0.093956551	1.661568712	0.197391653	0.859510848	Not Sig	135890	NA	NA	2	21	75130.6	0.598814394	11864.82857	0.359668752
CDK19	NW_005081561.1	861477	997367	Adult Male	Heart	Adult Male Horton et al	298.6505897	0.080485288	0.043129928	3.478499843	0.062171077	0.104423265	Not Sig	NA	NA	NA	NA	NA	NA	NA	135890	NA	NA	2	21	75130.6	0.598814394	11864.82857	0.359668752
CDK19	NW_005081561.1	861477	997367	Adult Male	Liver	Adult Male Horton et al	150.8542578	-0.300369058	0.116524583	6.483000733	0.010891097	0.025008089	Sig	NA	NA	NA	NA	NA	NA	NA	135890	NA	NA	2	21	75130.6	0.598814394	11864.82857	0.359668752
CDK19	NW_005081561.1	861477	997367	Adult Male	Hyp	Adult Male Brain	367.422547	0.110022159	0.056217199	3.829012465	0.050372603	0.097771178	Not Sig	1643.955144	-0.047784243	0.055619792	0.738371933	0.390182906	0.964851606	Not Sig	135890	NA	NA	2	21	75130.6	0.598814394	11864.82857	0.359668752
CDK19	NW_005081561.1	861477	997367	Adult Male	AMV	Adult Male Brain	522.2381679	0.117413086	0.055930847	4.401178803	0.035914098	0.069566938	Not Sig	2398.052745	0.037763203	0.060979956	0.383333151	0.535824766	0.933674629	Not Sig	135890	NA	NA	2	21	75130.6	0.598814394	11864.82857	0.359668752
CDK19	NW_005081561.1	861477	997367	Nestling Female	Hyp	Nestling Female Brain	664.1776741	0.16435934	0.071579158	5.252504658	0.021915204	0.047345972	Sig	2897.462922	-0.194561265	0.116554366	2.784434091	0.095184312	0.720251116	Not Sig	135890	NA	NA	2	21	75130.6	0.598814394	11864.82857	0.359668752
CDK19	NW_005081561.1	861477	997367	Nestling Female	AMV	Nestling Female Brain	660.8212956	0.051725711	0.083381765	0.383796779	0.535578236	0.679415165	Not Sig	2440.953514	0.110087926	0.220026507	0.249893011	0.617150422	0.996634902	Not Sig	135890	NA	NA	2	21	75130.6	0.598814394	11864.82857	0.359668752
CDK19	NW_005081561.1	861477	997367	Nestling Male	Hyp	Nestling Male Brain	881.0431388	0.210840536	0.072956686	8.337826483	0.003882802	0.013734313	Sig	3558.12149	0.225478534	0.122564294	3.402698545	0.065089853	0.818704622	Not Sig	135890	NA	NA	2	21	75130.6	0.598814394	11864.82857	0.359668752
CDK19	NW_005081561.1	861477	997367	Nestling Male	AMV	Nestling Male Brain	742.9923004	0.034102063	0.105615024	0.103669598	0.747469637	0.846423495	Not Sig	2923.798641	-0.094332034	0.126408448	0.554873849	0.456333052	0.845468815	Not Sig	135890	NA	NA	2	21	75130.6	0.598814394	11864.82857	0.359668752
CEBPZ	NW_005081699.1	828737	843152	Adult Female	Hyp	Adult Female Brain	2080.267114	-0.997295943	0.064849596	232.6215158	1.6e-52	2.4e-50	Sig	5692.225887	-0.417090117	0.077744564	28.93057731	7.5e-08	7.44e-05	Sig	14415	NA	4	9	3	74459.35	0.615624391	11361.15	0.313020833
CEBPZ	NW_005081699.1	828737	843152	Adult Female	AMV	Adult Female Brain	2036.186427	-1.263381138	0.054404764	529.3131944	3.98e-117	4.28e-114	Sig	5671.204234	-0.503175446	0.067299791	56.19807699	6.55e-14	1.8e-10	Sig	14415	NA	4	9	3	74459.35	0.615624391	11361.15	0.313020833
CEBPZ	NW_005081699.1	828737	843152	Adult Male	Heart	Adult Male Horton et al	323.2430355	-1.432296222	0.050319186	811.4697286	1.73e-178	4.99e-176	Sig	NA	NA	NA	NA	NA	NA	NA	14415	NA	4	9	3	74459.35	0.615624391	11361.15	0.313020833
CEBPZ	NW_005081699.1	828737	843152	Adult Male	Liver	Adult Male Horton et al	380.7001483	-1.273087478	0.067355683	349.0216356	6.92e-78	7.31e-76	Sig	NA	NA	NA	NA	NA	NA	NA	14415	NA	4	9	3	74459.35	0.615624391	11361.15	0.313020833
CEBPZ	NW_005081699.1	828737	843152	Adult Male	Hyp	Adult Male Brain	804.4754575	-0.771653402	0.044078414	306.3081305	1.39e-68	1.63e-66	Sig	2446.967288	-0.32062385	0.036256736	78.35970473	8.59e-19	1.31e-15	Sig	14415	NA	4	9	3	74459.35	0.615624391	11361.15	0.313020833
CEBPZ	NW_005081699.1	828737	843152	Adult Male	AMV	Adult Male Brain	717.5664058	-1.090416622	0.054909349	391.6382819	3.64e-87	9.52e-85	Sig	2220.967015	-0.423881185	0.047920636	78.3797357	8.5e-19	1.73e-15	Sig	14415	NA	4	9	3	74459.35	0.615624391	11361.15	0.313020833
CEBPZ	NW_005081699.1	828737	843152	Nestling Female	Hyp	Nestling Female Brain	2049.421141	-1.385837341	0.055624933	603.2291574	3.32e-133	3.45e-130	Sig	5643.216233	-0.381941457	0.039772947	92.00093539	8.66e-22	6.12e-18	Sig	14415	NA	4	9	3	74459.35	0.615624391	11361.15	0.313020833
CEBPZ	NW_005081699.1	828737	843152	Nestling Female	AMV	Nestling Female Brain	2130.626185	-1.251672118	0.092690177	175.941377	3.73e-40	3.22e-38	Sig	5530.969997	-0.394138399	0.08212894	23.09637552	1.54e-06	0.001751033	Sig	14415	NA	4	9	3	74459.35	0.615624391	11361.15	0.313020833
CEBPZ	NW_005081699.1	828737	843152	Nestling Male	Hyp	Nestling Male Brain	2080.49633	-1.249993315	0.057585857	460.7559542	3.29e-102	3.6e-99	Sig	6127.806779	-0.428361345	0.058740728	52.39168082	4.55e-13	1.75e-09	Sig	14415	NA	4	9	3	74459.35	0.615624391	11361.15	0.313020833
CEBPZ	NW_005081699.1	828737	843152	Nestling Male	AMV	Nestling Male Brain	2199.681175	-1.189800086	0.072224038	264.6444834	1.67e-59	8.63e-57	Sig	5773.241459	-0.436502736	0.074873224	33.29689514	7.91e-09	2.42e-05	Sig	14415	NA	4	9	3	74459.35	0.615624391	11361.15	0.313020833
CENPF	NW_005081548.1	2767537	2801628	Adult Female	Hyp	Adult Female Brain	106.4947434	2.225974563	0.259834083	69.16440735	9.06e-17	2.21e-15	Sig	220.8621938	1.505656338	0.225630997	42.02510111	9.01e-11	3.13e-07	Sig	34091	NA	45	22	6	85108.73333	0.387492694	22426.16667	0.197505198
CENPF	NW_005081548.1	2767537	2801628	Adult Female	AMV	Adult Female Brain	229.3226402	2.023481297	0.161398648	151.1750169	9.6e-35	5.42e-33	Sig	470.3725184	1.513215142	0.125964705	137.6999327	8.48e-32	1.16e-27	Sig	34091	NA	45	22	6	85108.73333	0.387492694	22426.16667	0.197505198
CENPF	NW_005081548.1	2767537	2801628	Adult Male	Heart	Adult Male Horton et al	28.34770735	1.52183416	0.638660788	3.928793302	0.047465992	0.082611837	Not Sig	NA	NA	NA	NA	NA	NA	NA	34091	NA	45	22	6	85108.73333	0.387492694	22426.16667	0.197505198
CENPF	NW_005081548.1	2767537	2801628	Adult Male	Liver	Adult Male Horton et al	67.25381311	-0.199633157	0.185425352	1.136106742	0.286476498	0.416648263	Not Sig	NA	NA	NA	NA	NA	NA	NA	34091	NA	45	22	6	85108.73333	0.387492694	22426.16667	0.197505198
CENPF	NW_005081548.1	2767537	2801628	Adult Male	Hyp	Adult Male Brain	34.77391782	2.643227974	0.579517358	16.59440014	4.63e-05	0.000177717	Sig	73.86533267	1.729773358	0.176074416	94.65975344	2.26e-22	5.17e-19	Sig	34091	NA	45	22	6	85108.73333	0.387492694	22426.16667	0.197505198
CENPF	NW_005081548.1	2767537	2801628	Adult Male	AMV	Adult Male Brain	76.89265304	2.421720063	0.181711654	177.290894	1.89e-40	9.42e-39	Sig	154.2521128	1.514248288	0.165200099	80.76263116	2.55e-19	6.04e-16	Sig	34091	NA	45	22	6	85108.73333	0.387492694	22426.16667	0.197505198
CENPF	NW_005081548.1	2767537	2801628	Nestling Female	Hyp	Nestling Female Brain	221.0188503	0.695371919	0.128192033	28.95798056	7.4e-08	4.71e-07	Sig	601.6467274	0.156276174	0.157037439	0.99012888	0.319710877	0.930855373	Not Sig	34091	NA	45	22	6	85108.73333	0.387492694	22426.16667	0.197505198
CENPF	NW_005081548.1	2767537	2801628	Nestling Female	AMV	Nestling Female Brain	371.0234019	1.045128374	0.1425219	52.27958485	4.81e-13	7.91e-12	Sig	847.3409574	0.375663493	0.210269021	3.166732778	0.075152646	0.996634902	Not Sig	34091	NA	45	22	6	85108.73333	0.387492694	22426.16667	0.197505198
CENPF	NW_005081548.1	2767537	2801628	Nestling Male	Hyp	Nestling Male Brain	278.1821252	0.601285117	0.123446861	23.59332652	1.19e-06	1.09e-05	Sig	746.1888085	0.294544849	0.149158474	3.927237611	0.047509925	0.762371176	Not Sig	34091	NA	45	22	6	85108.73333	0.387492694	22426.16667	0.197505198
CENPF	NW_005081548.1	2767537	2801628	Nestling Male	AMV	Nestling Male Brain	418.2440043	0.890453731	0.118580796	55.60421645	8.86e-14	2.08e-12	Sig	911.8859407	0.502507618	0.204680654	6.121032859	0.013358273	0.489435729	Not Sig	34091	NA	45	22	6	85108.73333	0.387492694	22426.16667	0.197505198
CENPQ	NW_005081635.1	1131980	1136477	Adult Female	Hyp	Adult Female Brain	NA	NA	NA	NA	NA	NA	NA	549.7609324	0.016007996	0.213178869	0.00563707	0.940150724	0.998912819	Not Sig	NA	NA	NA	NA	0	NA	-1	NA	-1
CENPQ	NW_005081635.1	1131980	1136477	Adult Female	AMV	Adult Female Brain	NA	NA	NA	NA	NA	NA	NA	448.1477807	-0.099856709	0.179724686	0.309333584	0.578089413	0.983434407	Not Sig	NA	NA	NA	NA	0	NA	-1	NA	-1
CENPQ	NW_005081635.1	1131980	1136477	Adult Male	Heart	Adult Male Horton et al	NA	NA	NA	NA	NA	NA	NA	NA	NA	NA	NA	NA	NA	NA	NA	NA	NA	NA	0	NA	-1	NA	-1
CENPQ	NW_005081635.1	1131980	1136477	Adult Male	Liver	Adult Male Horton et al	NA	NA	NA	NA	NA	NA	NA	NA	NA	NA	NA	NA	NA	NA	NA	NA	NA	NA	0	NA	-1	NA	-1
CENPQ	NW_005081635.1	1131980	1136477	Adult Male	Hyp	Adult Male Brain	NA	NA	NA	NA	NA	NA	NA	283.9404988	-0.128646046	0.161669081	0.635124324	0.425481884	0.96600323	Not Sig	NA	NA	NA	NA	0	NA	-1	NA	-1
CENPQ	NW_005081635.1	1131980	1136477	Adult Male	AMV	Adult Male Brain	NA	NA	NA	NA	NA	NA	NA	231.1755854	-0.037292226	0.146341078	0.065302874	0.798302756	0.976150894	Not Sig	NA	NA	NA	NA	0	NA	-1	NA	-1
CENPQ	NW_005081635.1	1131980	1136477	Nestling Female	Hyp	Nestling Female Brain	NA	NA	NA	NA	NA	NA	NA	394.032294	-0.213677376	0.188780271	1.279704633	0.257953961	0.893532568	Not Sig	NA	NA	NA	NA	0	NA	-1	NA	-1
CENPQ	NW_005081635.1	1131980	1136477	Nestling Female	AMV	Nestling Female Brain	NA	NA	NA	NA	NA	NA	NA	269.3279054	-0.02276726	0.205358204	0.012336816	0.911559869	0.996634902	Not Sig	NA	NA	NA	NA	0	NA	-1	NA	-1
CENPQ	NW_005081635.1	1131980	1136477	Nestling Male	Hyp	Nestling Male Brain	NA	NA	NA	NA	NA	NA	NA	420.7626277	-0.047030036	0.188612783	0.062169247	0.803099637	1	Not Sig	NA	NA	NA	NA	0	NA	-1	NA	-1
CENPQ	NW_005081635.1	1131980	1136477	Nestling Male	AMV	Nestling Male Brain	NA	NA	NA	NA	NA	NA	NA	290.6065931	0.065249641	0.130513076	0.250760068	0.616540398	0.904129066	Not Sig	NA	NA	NA	NA	0	NA	-1	NA	-1
CENPW	NW_005081591.1	1964183	1974671	Adult Female	Hyp	Adult Female Brain	134.0814165	1.097271841	0.249818416	18.38680037	1.8e-05	0.000100264	Sig	353.518513	0.239507423	0.152150593	2.464791634	0.11642314	0.982560447	Not Sig	10488	NA	NA	NA	14	104559	0.136956945	15929.5	0.481288981
CENPW	NW_005081591.1	1964183	1974671	Adult Female	AMV	Adult Female Brain	285.3181381	-0.14267635	0.160877739	0.778878701	0.377484293	0.541137857	Not Sig	740.1360057	-0.008855695	0.206914141	0.001838143	0.96580232	0.997063119	Not Sig	10488	NA	NA	NA	14	104559	0.136956945	15929.5	0.481288981
CENPW	NW_005081591.1	1964183	1974671	Adult Male	Heart	Adult Male Horton et al	1.675723033	-2.037340376	2.940909968	0.550174128	0.458246554	0.57033564	Not Sig	NA	NA	NA	NA	NA	NA	NA	10488	NA	NA	NA	14	104559	0.136956945	15929.5	0.481288981
CENPW	NW_005081591.1	1964183	1974671	Adult Male	Liver	Adult Male Horton et al	3.064191675	0.594794496	1.473062463	0.186980264	0.665441892	0.785332959	Not Sig	NA	NA	NA	NA	NA	NA	NA	10488	NA	NA	NA	14	104559	0.136956945	15929.5	0.481288981
CENPW	NW_005081591.1	1964183	1974671	Adult Male	Hyp	Adult Male Brain	70.13342315	0.796934921	0.142134752	31.35274923	2.15e-08	1.33e-07	Sig	203.0644318	0.272050323	0.118693631	5.242872018	0.022036865	0.481091431	Not Sig	10488	NA	NA	NA	14	104559	0.136956945	15929.5	0.481288981
CENPW	NW_005081591.1	1964183	1974671	Adult Male	AMV	Adult Male Brain	106.021711	-0.606263076	0.115105816	27.69460349	1.42e-07	7.5e-07	Sig	388.4442702	-0.479357726	0.172680659	7.710259967	0.005490784	0.251147457	Not Sig	10488	NA	NA	NA	14	104559	0.136956945	15929.5	0.481288981
CENPW	NW_005081591.1	1964183	1974671	Nestling Female	Hyp	Nestling Female Brain	216.4747149	1.167628929	0.140673469	66.85542069	2.92e-16	5.22e-15	Sig	513.9994823	0.53945495	0.145813104	13.6243168	0.000223275	0.035858427	Sig	10488	NA	NA	NA	14	104559	0.136956945	15929.5	0.481288981
CENPW	NW_005081591.1	1964183	1974671	Nestling Female	AMV	Nestling Female Brain	248.3544446	0.343263073	0.18706953	3.273831912	0.070393021	0.138774813	Not Sig	596.5421167	0.342149903	0.19977942	2.912457992	0.087897818	0.996634902	Not Sig	10488	NA	NA	NA	14	104559	0.136956945	15929.5	0.481288981
CENPW	NW_005081591.1	1964183	1974671	Nestling Male	Hyp	Nestling Male Brain	244.6827506	1.108977561	0.155692086	49.44408154	2.04e-12	4.86e-11	Sig	541.1643739	0.847882386	0.125300757	46.21870242	1.06e-11	3.25e-08	Sig	10488	NA	NA	NA	14	104559	0.136956945	15929.5	0.481288981
CENPW	NW_005081591.1	1964183	1974671	Nestling Male	AMV	Nestling Male Brain	264.4204147	0.120409117	0.201359421	0.347447456	0.555561632	0.729703413	Not Sig	656.6976174	0.251741696	0.198104045	1.628589259	0.201898285	0.722338805	Not Sig	10488	NA	NA	NA	14	104559	0.136956945	15929.5	0.481288981
CEP162	NW_005081569.1	2968920	3013377	Adult Female	Hyp	Adult Female Brain	848.4158512	-0.413317995	0.088076123	21.92314456	2.84e-06	1.89e-05	Sig	3005.262751	-0.196154624	0.153828444	1.631447189	0.201502999	0.998912819	Not Sig	44457	1	13	9	6	61141.73333	0.850185077	7035.173333	0.355307696
CEP162	NW_005081569.1	2968920	3013377	Adult Female	AMV	Adult Female Brain	497.0143631	-0.637479165	0.12244866	26.80417618	2.25e-07	1.56e-06	Sig	1805.045311	-0.103557099	0.091673551	1.278246882	0.258225252	0.903564257	Not Sig	44457	1	13	9	6	61141.73333	0.850185077	7035.173333	0.355307696
CEP162	NW_005081569.1	2968920	3013377	Adult Male	Heart	Adult Male Horton et al	52.1445898	-0.263443325	0.111878876	5.492070668	0.019102905	0.03663861	Sig	NA	NA	NA	NA	NA	NA	NA	44457	1	13	9	6	61141.73333	0.850185077	7035.173333	0.355307696
CEP162	NW_005081569.1	2968920	3013377	Adult Male	Liver	Adult Male Horton et al	41.2917872	0.077984423	0.19116926	0.159602435	0.689522809	0.803650722	Not Sig	NA	NA	NA	NA	NA	NA	NA	44457	1	13	9	6	61141.73333	0.850185077	7035.173333	0.355307696
CEP162	NW_005081569.1	2968920	3013377	Adult Male	Hyp	Adult Male Brain	334.2426311	-0.340836832	0.061868692	30.34125427	3.62e-08	2.16e-07	Sig	1483.112562	-0.166621346	0.068101082	5.992406811	0.014367586	0.400365045	Not Sig	44457	1	13	9	6	61141.73333	0.850185077	7035.173333	0.355307696
CEP162	NW_005081569.1	2968920	3013377	Adult Male	AMV	Adult Male Brain	187.9783551	-0.389077066	0.113541339	11.61258715	0.00065507	0.001935601	Sig	866.0464316	-0.326894777	0.092087781	12.6214358	0.000381348	0.043759718	Sig	44457	1	13	9	6	61141.73333	0.850185077	7035.173333	0.355307696
CEP162	NW_005081569.1	2968920	3013377	Nestling Female	Hyp	Nestling Female Brain	631.0403466	-0.369004456	0.085253521	18.56721754	1.64e-05	7.43e-05	Sig	2356.333141	-0.230113532	0.161285431	2.033938802	0.15382151	0.808287437	Not Sig	44457	1	13	9	6	61141.73333	0.850185077	7035.173333	0.355307696
CEP162	NW_005081569.1	2968920	3013377	Nestling Female	AMV	Nestling Female Brain	315.7389834	-0.561477168	0.149869914	13.80454185	0.000202845	0.00086043	Sig	1061.685888	-0.133716063	0.171874198	0.606724781	0.43602366	0.996634902	Not Sig	44457	1	13	9	6	61141.73333	0.850185077	7035.173333	0.355307696
CEP162	NW_005081569.1	2968920	3013377	Nestling Male	Hyp	Nestling Male Brain	636.0767621	-0.375260835	0.11286248	10.92452368	0.000948996	0.004132481	Sig	2771.06353	-0.453501335	0.143633867	9.805743343	0.001739677	0.200117411	Not Sig	44457	1	13	9	6	61141.73333	0.850185077	7035.173333	0.355307696
CEP162	NW_005081569.1	2968920	3013377	Nestling Male	AMV	Nestling Male Brain	355.5529059	-0.460825392	0.149944307	9.313244932	0.002275032	0.008581858	Sig	1301.419203	-0.420397964	0.238815719	3.03784548	0.081343814	0.604606353	Not Sig	44457	1	13	9	6	61141.73333	0.850185077	7035.173333	0.355307696
CEP170	NW_005081620.1	1670189	1763303	Adult Female	Hyp	Adult Female Brain	3322.763164	-0.105795825	0.047307731	4.996917168	0.025392508	0.065410604	Not Sig	11280.15458	0.019749426	0.087835851	0.050535077	0.822134802	0.998912819	Not Sig	93114	NA	5	13	3	73756.93333	0.624098968	12825.21667	0.285491381
CEP170	NW_005081620.1	1670189	1763303	Adult Female	AMV	Adult Female Brain	3458.094881	-0.081876155	0.051284138	2.545363997	0.110618415	0.218792224	Not Sig	10135.86154	-0.076793989	0.126629682	0.368315063	0.543924138	0.981988557	Not Sig	93114	NA	5	13	3	73756.93333	0.624098968	12825.21667	0.285491381
CEP170	NW_005081620.1	1670189	1763303	Adult Male	Heart	Adult Male Horton et al	629.0560378	-0.429815332	0.032891421	170.6839587	5.25e-39	1.06e-37	Sig	NA	NA	NA	NA	NA	NA	NA	93114	NA	5	13	3	73756.93333	0.624098968	12825.21667	0.285491381
CEP170	NW_005081620.1	1670189	1763303	Adult Male	Liver	Adult Male Horton et al	126.2793454	-0.03008121	0.098239962	0.092469258	0.761061167	0.857462248	Not Sig	NA	NA	NA	NA	NA	NA	NA	93114	NA	5	13	3	73756.93333	0.624098968	12825.21667	0.285491381
CEP170	NW_005081620.1	1670189	1763303	Adult Male	Hyp	Adult Male Brain	958.8315979	-0.029083514	0.040124045	0.525065252	0.468688951	0.607217705	Not Sig	4308.829072	0.052027743	0.114963849	0.204677297	0.650971663	0.982981186	Not Sig	93114	NA	5	13	3	73756.93333	0.624098968	12825.21667	0.285491381
CEP170	NW_005081620.1	1670189	1763303	Adult Male	AMV	Adult Male Brain	877.966744	-0.016301075	0.063537587	0.065549581	0.797930356	0.880416828	Not Sig	4269.69234	-0.107265832	0.134868791	0.633208603	0.426180814	0.904482379	Not Sig	93114	NA	5	13	3	73756.93333	0.624098968	12825.21667	0.285491381
CEP170	NW_005081620.1	1670189	1763303	Nestling Female	Hyp	Nestling Female Brain	3065.567944	0.103752997	0.036999604	7.854511547	0.005069405	0.012759642	Sig	10445.22939	-0.135775099	0.096399573	1.983162445	0.159057646	0.815608684	Not Sig	93114	NA	5	13	3	73756.93333	0.624098968	12825.21667	0.285491381
CEP170	NW_005081620.1	1670189	1763303	Nestling Female	AMV	Nestling Female Brain	3911.441041	0.023818727	0.035830689	0.441704968	0.506300686	0.654208751	Not Sig	13730.02612	-0.318198167	0.177911397	3.208078776	0.073275477	0.996634902	Not Sig	93114	NA	5	13	3	73756.93333	0.624098968	12825.21667	0.285491381
CEP170	NW_005081620.1	1670189	1763303	Nestling Male	Hyp	Nestling Male Brain	3296.068041	0.124913858	0.039369634	10.06145003	0.00151404	0.006197925	Sig	11356.7691	-0.0197232	0.213301136	0.008545411	0.926347354	1	Not Sig	93114	NA	5	13	3	73756.93333	0.624098968	12825.21667	0.285491381
CEP170	NW_005081620.1	1670189	1763303	Nestling Male	AMV	Nestling Male Brain	4533.108933	0.025595184	0.04480277	0.326151951	0.567933793	0.738456627	Not Sig	15682.91128	-0.157721761	0.12338208	1.622912367	0.202686177	0.722379777	Not Sig	93114	NA	5	13	3	73756.93333	0.624098968	12825.21667	0.285491381
CEP57L1	NW_005081561.1	1561326	1585093	Adult Female	Hyp	Adult Female Brain	55.9745649	1.795014134	0.355081419	23.69740069	1.13e-06	8.12e-06	Sig	107.2837976	1.984008965	0.599865222	9.892482137	0.001659554	0.181790331	Not Sig	23767	NA	3	2	10	106364.5	0.12838496	16842.05	0.427754677
CEP57L1	NW_005081561.1	1561326	1585093	Adult Female	AMV	Adult Female Brain	39.25511452	2.900453577	0.516308334	26.90491983	2.14e-07	1.49e-06	Sig	71.02235364	1.953298323	0.363001339	26.98710776	2.05e-07	0.000122035	Sig	23767	NA	3	2	10	106364.5	0.12838496	16842.05	0.427754677
CEP57L1	NW_005081561.1	1561326	1585093	Adult Male	Heart	Adult Male Horton et al	3.752641393	3.146404488	0.732668335	15.45758726	8.44e-05	0.000245746	Sig	NA	NA	NA	NA	NA	NA	NA	23767	NA	3	2	10	106364.5	0.12838496	16842.05	0.427754677
CEP57L1	NW_005081561.1	1561326	1585093	Adult Male	Liver	Adult Male Horton et al	9.205885335	2.883211099	0.551517339	20.66513172	5.47e-06	2.38e-05	Sig	NA	NA	NA	NA	NA	NA	NA	23767	NA	3	2	10	106364.5	0.12838496	16842.05	0.427754677
CEP57L1	NW_005081561.1	1561326	1585093	Adult Male	Hyp	Adult Male Brain	29.65965383	2.16931899	0.31340529	45.49058474	1.53e-11	1.29e-10	Sig	68.11423593	1.280361117	0.320628875	15.38409066	8.77e-05	0.010738331	Sig	23767	NA	3	2	10	106364.5	0.12838496	16842.05	0.427754677
CEP57L1	NW_005081561.1	1561326	1585093	Adult Male	AMV	Adult Male Brain	16.72034883	3.381712099	0.606219749	23.54877391	1.22e-06	5.61e-06	Sig	37.14580781	2.284919189	0.258214316	76.75555422	1.93e-18	3.44e-15	Sig	23767	NA	3	2	10	106364.5	0.12838496	16842.05	0.427754677
CEP57L1	NW_005081561.1	1561326	1585093	Nestling Female	Hyp	Nestling Female Brain	56.27142673	2.184070618	0.275059172	59.01846974	1.56e-14	2.38e-13	Sig	109.34021	1.522832643	0.262041297	32.76083295	1.04e-08	1.31e-05	Sig	23767	NA	3	2	10	106364.5	0.12838496	16842.05	0.427754677
CEP57L1	NW_005081561.1	1561326	1585093	Nestling Female	AMV	Nestling Female Brain	40.11158394	3.627031655	0.681993482	19.64548828	9.32e-06	5.19e-05	Sig	59.6879771	2.964276334	0.530441043	26.97032769	2.07e-07	0.000334697	Sig	23767	NA	3	2	10	106364.5	0.12838496	16842.05	0.427754677
CEP57L1	NW_005081561.1	1561326	1585093	Nestling Male	Hyp	Nestling Male Brain	54.16533134	1.647704898	0.309195146	27.04004184	1.99e-07	2.02e-06	Sig	105.4410657	1.215454639	0.313557952	15.10450493	0.00010172	0.037219926	Sig	23767	NA	3	2	10	106364.5	0.12838496	16842.05	0.427754677
CEP57L1	NW_005081561.1	1561326	1585093	Nestling Male	AMV	Nestling Male Brain	36.03167855	3.947256412	0.638962082	30.49909854	3.34e-08	4.13e-07	Sig	45.14265482	3.374235248	0.76416473	18.39261778	1.8e-05	0.015258038	Sig	23767	NA	3	2	10	106364.5	0.12838496	16842.05	0.427754677
CEP68	NW_005081615.1	1900165	1908151	Adult Female	Hyp	Adult Female Brain	NA	NA	NA	NA	NA	NA	NA	891.8884482	0.28124634	0.119528822	5.500107814	0.019015301	0.609368102	Not Sig	7986	NA	4	2	5	NA	-1	NA	-1
CEP68	NW_005081615.1	1900165	1908151	Adult Female	AMV	Adult Female Brain	NA	NA	NA	NA	NA	NA	NA	788.3568583	0.401719418	0.130416265	9.394085658	0.002176865	0.138679177	Not Sig	7986	NA	4	2	5	NA	-1	NA	-1
CEP68	NW_005081615.1	1900165	1908151	Adult Male	Heart	Adult Male Horton et al	42.76851196	0.507939882	0.116962543	18.73596269	1.5e-05	4.79e-05	Sig	NA	NA	NA	NA	NA	NA	NA	7986	NA	4	2	5	NA	-1	NA	-1
CEP68	NW_005081615.1	1900165	1908151	Adult Male	Liver	Adult Male Horton et al	35.2894612	0.672371533	0.351939642	3.077150497	0.079399521	0.140831043	Not Sig	NA	NA	NA	NA	NA	NA	NA	7986	NA	4	2	5	NA	-1	NA	-1
CEP68	NW_005081615.1	1900165	1908151	Adult Male	Hyp	Adult Male Brain	135.679437	0.275967326	0.094343428	8.550985427	0.003453352	0.009244088	Sig	333.7016547	-0.054672751	0.143919477	0.144376921	0.703967958	0.987192483	Not Sig	7986	NA	4	2	5	NA	-1	NA	-1
CEP68	NW_005081615.1	1900165	1908151	Adult Male	AMV	Adult Male Brain	118.9461754	0.302559242	0.121945288	6.107305006	0.013462425	0.029771029	Sig	285.0283365	0.21314323	0.110045247	3.740407457	0.053111492	0.602919369	Not Sig	7986	NA	4	2	5	NA	-1	NA	-1
CEP68	NW_005081615.1	1900165	1908151	Nestling Female	Hyp	Nestling Female Brain	NA	NA	NA	NA	NA	NA	NA	881.0669916	0.162922383	0.095193714	2.928454186	0.087030787	0.699662182	Not Sig	7986	NA	4	2	5	NA	-1	NA	-1
CEP68	NW_005081615.1	1900165	1908151	Nestling Female	AMV	Nestling Female Brain	NA	NA	NA	NA	NA	NA	NA	898.0017465	-0.060852618	0.133846292	0.206869206	0.649232434	0.996634902	Not Sig	7986	NA	4	2	5	NA	-1	NA	-1
CEP68	NW_005081615.1	1900165	1908151	Nestling Male	Hyp	Nestling Male Brain	NA	NA	NA	NA	NA	NA	NA	963.9654755	-0.059639129	0.072775926	0.670912392	0.412733686	0.995064234	Not Sig	7986	NA	4	2	5	NA	-1	NA	-1
CEP68	NW_005081615.1	1900165	1908151	Nestling Male	AMV	Nestling Male Brain	NA	NA	NA	NA	NA	NA	NA	913.7100369	-0.013039041	0.111680568	0.01363628	0.907038766	0.983091814	Not Sig	7986	NA	4	2	5	NA	-1	NA	-1
CEP85L	NW_005081697.1	340991	481120	Adult Female	Hyp	Adult Female Brain	741.4770149	0.08465299	0.112191971	0.564517861	0.452445633	0.64086302	Not Sig	2205.848105	-0.019624361	0.116900838	0.028211652	0.866612193	0.998912819	Not Sig	140129	NA	2	6	12	76446.375	0.569574323	10698.87875	0.734381091
CEP85L	NW_005081697.1	340991	481120	Adult Female	AMV	Adult Female Brain	960.4068231	0.146318178	0.075935278	3.710847222	0.054059944	0.12163754	Not Sig	2634.968741	0.155987999	0.14725653	1.117863734	0.290378913	0.918274419	Not Sig	140129	NA	2	6	12	76446.375	0.569574323	10698.87875	0.734381091
CEP85L	NW_005081697.1	340991	481120	Adult Male	Heart	Adult Male Horton et al	287.9492524	0.133776162	0.054560082	5.991457494	0.01437532	0.028132696	Sig	NA	NA	NA	NA	NA	NA	NA	140129	NA	2	6	12	76446.375	0.569574323	10698.87875	0.734381091
CEP85L	NW_005081697.1	340991	481120	Adult Male	Liver	Adult Male Horton et al	88.43686582	0.152309351	0.101890644	2.208958581	0.13721127	0.223869076	Not Sig	NA	NA	NA	NA	NA	NA	NA	140129	NA	2	6	12	76446.375	0.569574323	10698.87875	0.734381091
CEP85L	NW_005081697.1	340991	481120	Adult Male	Hyp	Adult Male Brain	340.9141899	0.137134313	0.083154404	2.704534767	0.100063269	0.176621743	Not Sig	1078.891535	0.157555876	0.048121594	10.70480326	0.001068577	0.082769477	Not Sig	140129	NA	2	6	12	76446.375	0.569574323	10698.87875	0.734381091
CEP85L	NW_005081697.1	340991	481120	Adult Male	AMV	Adult Male Brain	444.1738957	0.192576776	0.055855385	11.87871731	0.00056779	0.001692047	Sig	1333.323039	0.147093587	0.155401289	0.894146842	0.344356021	0.876376466	Not Sig	140129	NA	2	6	12	76446.375	0.569574323	10698.87875	0.734381091
CEP85L	NW_005081697.1	340991	481120	Nestling Female	Hyp	Nestling Female Brain	498.9882912	0.244623549	0.072133657	11.47083776	0.000706968	0.00220821	Sig	1470.775927	-0.053616716	0.137521986	0.152046675	0.696587106	0.99229163	Not Sig	140129	NA	2	6	12	76446.375	0.569574323	10698.87875	0.734381091
CEP85L	NW_005081697.1	340991	481120	Nestling Female	AMV	Nestling Female Brain	618.1877519	0.193178769	0.094408766	4.168100684	0.041191952	0.089755095	Not Sig	1406.373209	0.266196564	0.40593122	0.427750539	0.513094794	0.996634902	Not Sig	140129	NA	2	6	12	76446.375	0.569574323	10698.87875	0.734381091
CEP85L	NW_005081697.1	340991	481120	Nestling Male	Hyp	Nestling Male Brain	570.8152965	0.31313655	0.111079138	7.871492662	0.005022018	0.017153331	Sig	1749.403767	-0.040400251	0.133948058	0.090916484	0.763015254	1	Not Sig	140129	NA	2	6	12	76446.375	0.569574323	10698.87875	0.734381091
CEP85L	NW_005081697.1	340991	481120	Nestling Male	AMV	Nestling Male Brain	766.1040253	0.041958409	0.08987462	0.217500233	0.640951252	0.790684799	Not Sig	1953.924751	-0.015882899	0.305659189	0.002698747	0.958568958	0.997071255	Not Sig	140129	NA	2	6	12	76446.375	0.569574323	10698.87875	0.734381091
CFAP206	NW_005081569.1	3996651	4037237	Adult Female	Hyp	Adult Female Brain	NA	NA	NA	NA	NA	NA	NA	NA	NA	NA	NA	NA	NA	NA	40586	NA	1	4	26	69604.16667	0.708552503	7428.24	0.303874039
CFAP206	NW_005081569.1	3996651	4037237	Adult Female	AMV	Adult Female Brain	NA	NA	NA	NA	NA	NA	NA	NA	NA	NA	NA	NA	NA	NA	40586	NA	1	4	26	69604.16667	0.708552503	7428.24	0.303874039
CFAP206	NW_005081569.1	3996651	4037237	Adult Male	Heart	Adult Male Horton et al	NA	NA	NA	NA	NA	NA	NA	NA	NA	NA	NA	NA	NA	NA	40586	NA	1	4	26	69604.16667	0.708552503	7428.24	0.303874039
CFAP206	NW_005081569.1	3996651	4037237	Adult Male	Liver	Adult Male Horton et al	NA	NA	NA	NA	NA	NA	NA	NA	NA	NA	NA	NA	NA	NA	40586	NA	1	4	26	69604.16667	0.708552503	7428.24	0.303874039
CFAP206	NW_005081569.1	3996651	4037237	Adult Male	Hyp	Adult Male Brain	NA	NA	NA	NA	NA	NA	NA	NA	NA	NA	NA	NA	NA	NA	40586	NA	1	4	26	69604.16667	0.708552503	7428.24	0.303874039
CFAP206	NW_005081569.1	3996651	4037237	Adult Male	AMV	Adult Male Brain	NA	NA	NA	NA	NA	NA	NA	NA	NA	NA	NA	NA	NA	NA	40586	NA	1	4	26	69604.16667	0.708552503	7428.24	0.303874039
CFAP206	NW_005081569.1	3996651	4037237	Nestling Female	Hyp	Nestling Female Brain	NA	NA	NA	NA	NA	NA	NA	NA	NA	NA	NA	NA	NA	NA	40586	NA	1	4	26	69604.16667	0.708552503	7428.24	0.303874039
CFAP206	NW_005081569.1	3996651	4037237	Nestling Female	AMV	Nestling Female Brain	NA	NA	NA	NA	NA	NA	NA	NA	NA	NA	NA	NA	NA	NA	40586	NA	1	4	26	69604.16667	0.708552503	7428.24	0.303874039
CFAP206	NW_005081569.1	3996651	4037237	Nestling Male	Hyp	Nestling Male Brain	NA	NA	NA	NA	NA	NA	NA	NA	NA	NA	NA	NA	NA	NA	40586	NA	1	4	26	69604.16667	0.708552503	7428.24	0.303874039
CFAP206	NW_005081569.1	3996651	4037237	Nestling Male	AMV	Nestling Male Brain	NA	NA	NA	NA	NA	NA	NA	NA	NA	NA	NA	NA	NA	NA	40586	NA	1	4	26	69604.16667	0.708552503	7428.24	0.303874039
CFAP36	NW_005081577.1	1990044	1996433	Adult Female	Hyp	Adult Female Brain	243.7072172	-0.151796084	0.178261054	0.713438924	0.398304531	0.58384667	Not Sig	2672.197274	0.097364603	0.113825407	0.729985319	0.392887947	0.998912819	Not Sig	6389	NA	NA	NA	37	131164	0.03526203	2854.14	0.751222921
CFAP36	NW_005081577.1	1990044	1996433	Adult Female	AMV	Adult Female Brain	223.9580819	-0.167406404	0.198404824	0.696149014	0.404080715	0.570279485	Not Sig	2429.724374	0.119600074	0.081418708	2.151994956	0.142384775	0.816757012	Not Sig	6389	NA	NA	NA	37	131164	0.03526203	2854.14	0.751222921
CFAP36	NW_005081577.1	1990044	1996433	Adult Male	Heart	Adult Male Horton et al	5.886337187	2.377921682	0.770178146	5.174459351	0.022921303	0.043290235	Sig	NA	NA	NA	NA	NA	NA	NA	6389	NA	NA	NA	37	131164	0.03526203	2854.14	0.751222921
CFAP36	NW_005081577.1	1990044	1996433	Adult Male	Liver	Adult Male Horton et al	4.09584074	1.407327091	1.501446969	0.594207518	0.440796694	0.57747784	Not Sig	NA	NA	NA	NA	NA	NA	NA	6389	NA	NA	NA	37	131164	0.03526203	2854.14	0.751222921
CFAP36	NW_005081577.1	1990044	1996433	Adult Male	Hyp	Adult Male Brain	123.651432	-0.082248216	0.114235001	0.51547212	0.472779564	0.611012409	Not Sig	1444.179487	0.056217725	0.066023897	0.724715875	0.39460136	0.964851606	Not Sig	6389	NA	NA	NA	37	131164	0.03526203	2854.14	0.751222921
CFAP36	NW_005081577.1	1990044	1996433	Adult Male	AMV	Adult Male Brain	117.6060179	0.400325494	0.128310129	9.640054671	0.001903796	0.005119204	Sig	1265.312627	0.198827928	0.066433097	8.93541736	0.002796936	0.166812444	Not Sig	6389	NA	NA	NA	37	131164	0.03526203	2854.14	0.751222921
CFAP36	NW_005081577.1	1990044	1996433	Nestling Female	Hyp	Nestling Female Brain	260.7007444	-0.143140494	0.106583842	1.792956745	0.180566328	0.279891303	Not Sig	2399.001561	0.264489334	0.098699428	7.171763642	0.007405993	0.249211666	Not Sig	6389	NA	NA	NA	37	131164	0.03526203	2854.14	0.751222921
CFAP36	NW_005081577.1	1990044	1996433	Nestling Female	AMV	Nestling Female Brain	361.4050438	0.015234207	0.133449639	0.01291428	0.909522375	0.94717945	Not Sig	3023.482433	0.443049285	0.176348751	6.244862305	0.012455406	0.970101733	Not Sig	6389	NA	NA	NA	37	131164	0.03526203	2854.14	0.751222921
CFAP36	NW_005081577.1	1990044	1996433	Nestling Male	Hyp	Nestling Male Brain	191.6924941	0.108664439	0.197955106	0.292748705	0.588464456	0.765704346	Not Sig	2523.508267	-0.245586338	0.167436485	2.133893294	0.144074409	0.965444738	Not Sig	6389	NA	NA	NA	37	131164	0.03526203	2854.14	0.751222921
CFAP36	NW_005081577.1	1990044	1996433	Nestling Male	AMV	Nestling Male Brain	306.9168766	0.328540198	0.155511249	4.407194845	0.035787644	0.086338828	Not Sig	2785.15631	0.272884944	0.16135832	2.887297803	0.089280555	0.621777753	Not Sig	6389	NA	NA	NA	37	131164	0.03526203	2854.14	0.751222921
CFAP61	NW_005081577.1	671217	753647	Adult Female	Hyp	Adult Female Brain	359.5457484	-0.801633662	0.134581454	35.0002133	3.3e-09	3.5e-08	Sig	953.4688458	-0.293674389	0.106811379	7.589036184	0.005872434	0.362263908	Not Sig	82430	1	6	12	26	93743.42	0.273524255	8599.478	0.547183787
CFAP61	NW_005081577.1	671217	753647	Adult Female	AMV	Adult Female Brain	86.73691006	-1.043455809	0.253576106	16.65057597	4.49e-05	0.000210751	Sig	208.3304639	-0.469758064	0.305990854	2.367592806	0.12387794	0.790851032	Not Sig	82430	1	6	12	26	93743.42	0.273524255	8599.478	0.547183787
CFAP61	NW_005081577.1	671217	753647	Adult Male	Heart	Adult Male Horton et al	0.221624863	0.167750652	2.956677532	0.005735171	0.939633183	100	Not Sig	NA	NA	NA	NA	NA	NA	NA	82430	1	6	12	26	93743.42	0.273524255	8599.478	0.547183787
CFAP61	NW_005081577.1	671217	753647	Adult Male	Liver	Adult Male Horton et al	7.652512806	-4.524762733	1.264075503	6.780751253	0.00921461	0.021391059	Sig	NA	NA	NA	NA	NA	NA	NA	82430	1	6	12	26	93743.42	0.273524255	8599.478	0.547183787
CFAP61	NW_005081577.1	671217	753647	Adult Male	Hyp	Adult Male Brain	110.1741713	-0.766537953	0.10266644	56.0050718	7.23e-14	7.38e-13	Sig	344.3309408	-0.430812143	0.115601874	13.90148827	0.000192646	0.01971026	Sig	82430	1	6	12	26	93743.42	0.273524255	8599.478	0.547183787
CFAP61	NW_005081577.1	671217	753647	Adult Male	AMV	Adult Male Brain	24.13065954	-1.766309108	0.660255186	5.344443868	0.020788414	0.043058774	Sig	72.00120308	-0.509954619	0.226842283	5.062096032	0.024454645	0.49112057	Not Sig	82430	1	6	12	26	93743.42	0.273524255	8599.478	0.547183787
CFAP61	NW_005081577.1	671217	753647	Nestling Female	Hyp	Nestling Female Brain	336.8941078	-0.356413084	0.096036538	13.69026289	0.000215569	0.000768197	Sig	902.4173809	-0.192870972	0.192730579	1.001155932	0.317030968	0.927276214	Not Sig	82430	1	6	12	26	93743.42	0.273524255	8599.478	0.547183787
CFAP61	NW_005081577.1	671217	753647	Nestling Female	AMV	Nestling Female Brain	95.17213906	-1.056649199	0.310931822	10.98463671	0.000918703	0.003325293	Sig	192.5036585	-0.26868673	0.3976072	0.458692393	0.49823572	0.996634902	Not Sig	82430	1	6	12	26	93743.42	0.273524255	8599.478	0.547183787
CFAP61	NW_005081577.1	671217	753647	Nestling Male	Hyp	Nestling Male Brain	284.1713414	-0.465328585	0.131533988	12.42902794	0.000422712	0.002017572	Sig	1023.128363	-0.714405122	0.154293068	20.84628128	4.98e-06	0.003410437	Sig	82430	1	6	12	26	93743.42	0.273524255	8599.478	0.547183787
CFAP61	NW_005081577.1	671217	753647	Nestling Male	AMV	Nestling Male Brain	106.8623618	-0.943607687	0.237071525	15.42576005	8.58e-05	0.000491544	Sig	226.9047231	-0.612116411	0.223220985	7.317972107	0.00682684	0.447958874	Not Sig	82430	1	6	12	26	93743.42	0.273524255	8599.478	0.547183787
CGA	NW_005081569.1	3896956	3902183	Adult Female	Hyp	Adult Female Brain	3.008600718	-0.464912335	2.182571656	0.052831908	0.818206833	0.909022602	Not Sig	4.212508891	5.373794853	2.11075481	5.665526443	0.017301524	0.594104512	Not Sig	5227	NA	NA	1	36	83239.35	0.452756673	4234.78	0.488469601
CGA	NW_005081569.1	3896956	3902183	Adult Female	AMV	Adult Female Brain	3.790276328	1.21518679	2.180310828	0.234616933	0.628121374	0.761402208	Not Sig	4.161070829	-1.448857728	2.069309636	0.48189114	0.487566954	0.967023817	Not Sig	5227	NA	NA	1	36	83239.35	0.452756673	4234.78	0.488469601
CGA	NW_005081569.1	3896956	3902183	Adult Male	Heart	Adult Male Horton et al	NA	NA	NA	NA	NA	NA	NA	NA	NA	NA	NA	NA	NA	NA	5227	NA	NA	1	36	83239.35	0.452756673	4234.78	0.488469601
CGA	NW_005081569.1	3896956	3902183	Adult Male	Liver	Adult Male Horton et al	NA	NA	NA	NA	NA	NA	NA	NA	NA	NA	NA	NA	NA	NA	5227	NA	NA	1	36	83239.35	0.452756673	4234.78	0.488469601
CGA	NW_005081569.1	3896956	3902183	Adult Male	Hyp	Adult Male Brain	0.165002436	0.38249468	3.030363876	0.025484218	0.873166423	100	Not Sig	1.277265976	3.736961684	2.580015578	2.516869352	0.112633997	100	Not Sig	5227	NA	NA	1	36	83239.35	0.452756673	4234.78	0.488469601
CGA	NW_005081569.1	3896956	3902183	Adult Male	AMV	Adult Male Brain	0	NA	NA	NA	NA	100	Not Sig	0	NA	NA	NA	NA	100	Not Sig	5227	NA	NA	1	36	83239.35	0.452756673	4234.78	0.488469601
CGA	NW_005081569.1	3896956	3902183	Nestling Female	Hyp	Nestling Female Brain	527.9295709	1.272873004	0.774132486	2.025963167	0.154630857	0.24860806	Not Sig	272.2891199	2.055514337	1.977810015	0.999668529	0.317390727	0.927560618	Not Sig	5227	NA	NA	1	36	83239.35	0.452756673	4234.78	0.488469601
CGA	NW_005081569.1	3896956	3902183	Nestling Female	AMV	Nestling Female Brain	5.233732987	4.049512276	1.590897251	4.198424957	0.040461543	0.088536358	Not Sig	2.936730183	2.311508628	2.220947052	0.982841812	0.321498214	0.996634902	Not Sig	5227	NA	NA	1	36	83239.35	0.452756673	4234.78	0.488469601
CGA	NW_005081569.1	3896956	3902183	Nestling Male	Hyp	Nestling Male Brain	1880.023973	0.059561364	0.640104694	0.007010519	0.933272024	0.972417848	Not Sig	3058.956543	0.944365634	2.206149325	0.184986165	0.667122769	1	Not Sig	5227	NA	NA	1	36	83239.35	0.452756673	4234.78	0.488469601
CGA	NW_005081569.1	3896956	3902183	Nestling Male	AMV	Nestling Male Brain	2.948802952	3.648844942	2.506473616	1.571754766	0.209952362	0.357097032	Not Sig	2.385775064	-2.090102752	2.378646115	0.677587729	0.410418621	0.829687132	Not Sig	5227	NA	NA	1	36	83239.35	0.452756673	4234.78	0.488469601
CGAS	NW_005081654.1	890889	896699	Adult Female	Hyp	Adult Female Brain	14.75531819	-0.989025937	0.594983355	2.638924601	0.104274106	0.206388108	Not Sig	96.95990157	-0.281487707	0.365169955	0.595786046	0.440190372	0.998912819	Not Sig	5810	NA	1	1	0	57960.5	0.894993181	4139.28	0.49475891
CGAS	NW_005081654.1	890889	896699	Adult Female	AMV	Adult Female Brain	19.31883044	-0.795610466	0.672370815	1.188116773	0.275709755	0.438035912	Not Sig	107.8028634	-0.173342228	0.288791555	0.361301989	0.547784032	0.981988557	Not Sig	5810	NA	1	1	0	57960.5	0.894993181	4139.28	0.49475891
CGAS	NW_005081654.1	890889	896699	Adult Male	Heart	Adult Male Horton et al	1.147668992	0.491370194	2.944081007	0.04117962	0.839191603	0.890675751	Not Sig	NA	NA	NA	NA	NA	NA	NA	5810	NA	1	1	0	57960.5	0.894993181	4139.28	0.49475891
CGAS	NW_005081654.1	890889	896699	Adult Male	Liver	Adult Male Horton et al	5.902503099	-0.663758482	1.184421766	0.321951452	0.570437247	0.704706833	Not Sig	NA	NA	NA	NA	NA	NA	NA	5810	NA	1	1	0	57960.5	0.894993181	4139.28	0.49475891
CGAS	NW_005081654.1	890889	896699	Adult Male	Hyp	Adult Male Brain	11.95649604	0.186937663	0.605317539	0.07194345	0.788527855	0.872272664	Not Sig	50.82324456	0.383704286	0.271141185	1.988681141	0.158478846	0.901309303	Not Sig	5810	NA	1	1	0	57960.5	0.894993181	4139.28	0.49475891
CGAS	NW_005081654.1	890889	896699	Adult Male	AMV	Adult Male Brain	12.07069919	-0.21543796	0.397342625	0.279465278	0.597051907	0.737327384	Not Sig	49.91300009	0.098894104	0.223124667	0.197808596	0.656495529	0.955042929	Not Sig	5810	NA	1	1	0	57960.5	0.894993181	4139.28	0.49475891
CGAS	NW_005081654.1	890889	896699	Nestling Female	Hyp	Nestling Female Brain	37.32167117	-0.236451608	0.346699715	0.428968618	0.512495466	0.642633372	Not Sig	194.5849741	0.13687065	0.207989476	0.432743555	0.510645789	0.978553032	Not Sig	5810	NA	1	1	0	57960.5	0.894993181	4139.28	0.49475891
CGAS	NW_005081654.1	890889	896699	Nestling Female	AMV	Nestling Female Brain	34.02830529	-0.977220245	0.552507262	2.537263449	0.111187342	0.208099276	Not Sig	151.5402701	0.103350147	0.279899739	0.136613412	0.711671224	0.996634902	Not Sig	5810	NA	1	1	0	57960.5	0.894993181	4139.28	0.49475891
CGAS	NW_005081654.1	890889	896699	Nestling Male	Hyp	Nestling Male Brain	37.00275326	0.420220027	0.368418806	1.247296368	0.264069485	0.45668979	Not Sig	227.5632656	-0.026813914	0.217802022	0.015549937	0.900761543	1	Not Sig	5810	NA	1	1	0	57960.5	0.894993181	4139.28	0.49475891
CGAS	NW_005081654.1	890889	896699	Nestling Male	AMV	Nestling Male Brain	35.9005561	0.676169726	0.501171488	1.639212323	0.200433575	0.344952034	Not Sig	176.3825032	0.096269613	0.279300274	0.119198733	0.729905158	0.938869291	Not Sig	5810	NA	1	1	0	57960.5	0.894993181	4139.28	0.49475891
CHAC2	NW_005081577.1	1401882	1407589	Adult Female	Hyp	Adult Female Brain	374.041456	0.051876591	0.127379203	0.165223617	0.684392094	0.836060926	Not Sig	1296.751701	-0.373579726	0.11720908	10.20694801	0.001399125	0.168008486	Not Sig	5707	NA	NA	NA	7	72167.1	0.666277031	3645.02	0.582809224
CHAC2	NW_005081577.1	1401882	1407589	Adult Female	AMV	Adult Female Brain	386.339232	-0.217062892	0.129431128	2.799702818	0.094281781	0.192141617	Not Sig	1333.915732	-0.337674908	0.096729241	12.23662469	0.000468605	0.050565086	Not Sig	5707	NA	NA	NA	7	72167.1	0.666277031	3645.02	0.582809224
CHAC2	NW_005081577.1	1401882	1407589	Adult Male	Heart	Adult Male Horton et al	404.3927955	0.289847334	0.061995193	21.69404224	3.2e-06	1.11e-05	Sig	NA	NA	NA	NA	NA	NA	NA	5707	NA	NA	NA	7	72167.1	0.666277031	3645.02	0.582809224
CHAC2	NW_005081577.1	1401882	1407589	Adult Male	Liver	Adult Male Horton et al	617.322171	0.539661939	0.056283354	91.12984734	1.35e-21	2.19e-20	Sig	NA	NA	NA	NA	NA	NA	NA	5707	NA	NA	NA	7	72167.1	0.666277031	3645.02	0.582809224
CHAC2	NW_005081577.1	1401882	1407589	Adult Male	Hyp	Adult Male Brain	221.4793661	-0.056302702	0.094107062	0.355882736	0.550801798	0.687358828	Not Sig	755.4797693	0.068942983	0.075160151	0.841662718	0.358921665	0.964851606	Not Sig	5707	NA	NA	NA	7	72167.1	0.666277031	3645.02	0.582809224
CHAC2	NW_005081577.1	1401882	1407589	Adult Male	AMV	Adult Male Brain	271.403686	-0.177650404	0.088064998	4.048567424	0.044208846	0.084538306	Not Sig	914.9392906	-0.110559465	0.164342273	0.453205898	0.500816443	0.925039513	Not Sig	5707	NA	NA	NA	7	72167.1	0.666277031	3645.02	0.582809224
CHAC2	NW_005081577.1	1401882	1407589	Nestling Female	Hyp	Nestling Female Brain	383.8849135	0.093125776	0.086558184	1.153224533	0.282875158	0.399528645	Not Sig	1229.118355	-0.066990501	0.091036389	0.541414239	0.46184721	0.974875267	Not Sig	5707	NA	NA	NA	7	72167.1	0.666277031	3645.02	0.582809224
CHAC2	NW_005081577.1	1401882	1407589	Nestling Female	AMV	Nestling Female Brain	315.6480079	-0.120477128	0.127290688	0.889226912	0.345686893	0.500399909	Not Sig	881.7436585	0.17384276	0.200059571	0.752726313	0.385614434	0.996634902	Not Sig	5707	NA	NA	NA	7	72167.1	0.666277031	3645.02	0.582809224
CHAC2	NW_005081577.1	1401882	1407589	Nestling Male	Hyp	Nestling Male Brain	420.7361185	0.225607808	0.138816839	2.598291342	0.106978995	0.223145117	Not Sig	1351.217532	0.235079006	0.117206165	4.044044851	0.044327457	0.750490116	Not Sig	5707	NA	NA	NA	7	72167.1	0.666277031	3645.02	0.582809224
CHAC2	NW_005081577.1	1401882	1407589	Nestling Male	AMV	Nestling Male Brain	307.1344171	0.249674843	0.169840776	2.12542371	0.144872713	0.273120689	Not Sig	919.8445714	0.171461943	0.215855694	0.634914678	0.425558288	0.833176365	Not Sig	5707	NA	NA	NA	7	72167.1	0.666277031	3645.02	0.582809224
CHGB	NW_005081615.1	801985	807231	Adult Female	Hyp	Adult Female Brain	NA	NA	NA	NA	NA	NA	NA	NA	NA	NA	NA	NA	NA	NA	5246	NA	2	2	11	NA	-1	NA	-1
CHGB	NW_005081615.1	801985	807231	Adult Female	AMV	Adult Female Brain	NA	NA	NA	NA	NA	NA	NA	NA	NA	NA	NA	NA	NA	NA	5246	NA	2	2	11	NA	-1	NA	-1
CHGB	NW_005081615.1	801985	807231	Adult Male	Heart	Adult Male Horton et al	NA	NA	NA	NA	NA	NA	NA	NA	NA	NA	NA	NA	NA	NA	5246	NA	2	2	11	NA	-1	NA	-1
CHGB	NW_005081615.1	801985	807231	Adult Male	Liver	Adult Male Horton et al	NA	NA	NA	NA	NA	NA	NA	NA	NA	NA	NA	NA	NA	NA	5246	NA	2	2	11	NA	-1	NA	-1
CHGB	NW_005081615.1	801985	807231	Adult Male	Hyp	Adult Male Brain	NA	NA	NA	NA	NA	NA	NA	NA	NA	NA	NA	NA	NA	NA	5246	NA	2	2	11	NA	-1	NA	-1
CHGB	NW_005081615.1	801985	807231	Adult Male	AMV	Adult Male Brain	NA	NA	NA	NA	NA	NA	NA	NA	NA	NA	NA	NA	NA	NA	5246	NA	2	2	11	NA	-1	NA	-1
CHGB	NW_005081615.1	801985	807231	Nestling Female	Hyp	Nestling Female Brain	NA	NA	NA	NA	NA	NA	NA	NA	NA	NA	NA	NA	NA	NA	5246	NA	2	2	11	NA	-1	NA	-1
CHGB	NW_005081615.1	801985	807231	Nestling Female	AMV	Nestling Female Brain	NA	NA	NA	NA	NA	NA	NA	NA	NA	NA	NA	NA	NA	NA	5246	NA	2	2	11	NA	-1	NA	-1
CHGB	NW_005081615.1	801985	807231	Nestling Male	Hyp	Nestling Male Brain	NA	NA	NA	NA	NA	NA	NA	NA	NA	NA	NA	NA	NA	NA	5246	NA	2	2	11	NA	-1	NA	-1
CHGB	NW_005081615.1	801985	807231	Nestling Male	AMV	Nestling Male Brain	NA	NA	NA	NA	NA	NA	NA	NA	NA	NA	NA	NA	NA	NA	5246	NA	2	2	11	NA	-1	NA	-1
CHRM3	NW_005081589.1	1108081	1304818	Adult Female	Hyp	Adult Female Brain	950.9049878	-0.250067255	0.086494576	8.328627778	0.003902513	0.013145964	Sig	2755.24649	-0.104749607	0.59896525	0.030646688	0.861030952	0.998912819	Not Sig	196737	NA	4	6	14	99119.40909	0.20983653	11644.21909	0.404143829
CHRM3	NW_005081589.1	1108081	1304818	Adult Female	AMV	Adult Female Brain	1660.609533	-0.031338521	0.062862389	0.248359884	0.618232309	0.755382821	Not Sig	4403.09029	0.117109193	0.502728599	0.054115169	0.816051313	0.992913561	Not Sig	196737	NA	4	6	14	99119.40909	0.20983653	11644.21909	0.404143829
CHRM3	NW_005081589.1	1108081	1304818	Adult Male	Heart	Adult Male Horton et al	19.90057116	1.6265334	0.241003896	42.91383696	5.72e-11	3.34e-10	Sig	NA	NA	NA	NA	NA	NA	NA	196737	NA	4	6	14	99119.40909	0.20983653	11644.21909	0.404143829
CHRM3	NW_005081589.1	1108081	1304818	Adult Male	Liver	Adult Male Horton et al	0.695968098	-0.452602205	2.94288128	0.030359755	0.861676451	100	Not Sig	NA	NA	NA	NA	NA	NA	NA	196737	NA	4	6	14	99119.40909	0.20983653	11644.21909	0.404143829
CHRM3	NW_005081589.1	1108081	1304818	Adult Male	Hyp	Adult Male Brain	354.744071	-0.237052725	0.07387399	10.25801913	0.001360917	0.003965886	Sig	1328.284176	-0.189372282	0.059482821	10.14763461	0.001444865	0.099317383	Not Sig	196737	NA	4	6	14	99119.40909	0.20983653	11644.21909	0.404143829
CHRM3	NW_005081589.1	1108081	1304818	Adult Male	AMV	Adult Male Brain	435.8833563	-0.234358495	0.058446443	16.06792779	6.11e-05	0.000213071	Sig	1537.916537	-0.218125083	0.253158684	0.743507166	0.388539719	0.891071953	Not Sig	196737	NA	4	6	14	99119.40909	0.20983653	11644.21909	0.404143829
CHRM3	NW_005081589.1	1108081	1304818	Nestling Female	Hyp	Nestling Female Brain	737.6709911	-0.158778633	0.066924236	5.61227734	0.017835069	0.039434897	Sig	2361.299752	0.017065709	0.354766726	0.002313774	0.961635192	0.996896415	Not Sig	196737	NA	4	6	14	99119.40909	0.20983653	11644.21909	0.404143829
CHRM3	NW_005081589.1	1108081	1304818	Nestling Female	AMV	Nestling Female Brain	945.2296181	0.253318733	0.1040296	5.871801805	0.015385297	0.039028878	Sig	2672.898047	0.044494789	0.421728462	0.011123011	0.916006297	0.996634902	Not Sig	196737	NA	4	6	14	99119.40909	0.20983653	11644.21909	0.404143829
CHRM3	NW_005081589.1	1108081	1304818	Nestling Male	Hyp	Nestling Male Brain	840.7227183	-0.115446773	0.09422414	1.491523714	0.221980198	0.39343723	Not Sig	2703.171742	0.072518472	0.320484642	0.051301314	0.820814167	1	Not Sig	196737	NA	4	6	14	99119.40909	0.20983653	11644.21909	0.404143829
CHRM3	NW_005081589.1	1108081	1304818	Nestling Male	AMV	Nestling Male Brain	874.2262882	0.30337965	0.110076562	7.530296883	0.006066991	0.020012421	Sig	2808.7356	-0.961052576	0.499822989	3.498039487	0.061441524	0.577231992	Not Sig	196737	NA	4	6	14	99119.40909	0.20983653	11644.21909	0.404143829
CITED2	NW_005081632.1	2489900	2491389	Adult Female	Hyp	Adult Female Brain	223.1946278	-0.143030048	0.159849277	0.796920998	0.372015538	0.560390695	Not Sig	1030.371955	0.165435952	0.193900428	0.725094002	0.39447805	0.998912819	Not Sig	NA	NA	NA	NA	0	53413.7	0.93395675	13588.7	0.686070686
CITED2	NW_005081632.1	2489900	2491389	Adult Female	AMV	Adult Female Brain	294.7678373	-0.340231467	0.151431355	5.008515433	0.025222928	0.062852494	Not Sig	1444.740577	-0.187649512	0.1516954	1.534921723	0.215375282	0.875827973	Not Sig	NA	NA	NA	NA	0	53413.7	0.93395675	13588.7	0.686070686
CITED2	NW_005081632.1	2489900	2491389	Adult Male	Heart	Adult Male Horton et al	14.46150868	0.482897842	0.213095976	5.017908983	0.025086446	0.046566042	Sig	NA	NA	NA	NA	NA	NA	NA	NA	NA	NA	NA	0	53413.7	0.93395675	13588.7	0.686070686
CITED2	NW_005081632.1	2489900	2491389	Adult Male	Liver	Adult Male Horton et al	56.90137041	-0.418445526	0.136669536	9.254013165	0.002349799	0.006204939	Sig	NA	NA	NA	NA	NA	NA	NA	NA	NA	NA	NA	0	53413.7	0.93395675	13588.7	0.686070686
CITED2	NW_005081632.1	2489900	2491389	Adult Male	Hyp	Adult Male Brain	76.70611248	0.258663542	0.134996124	3.655778083	0.055875051	0.106873734	Not Sig	382.9894973	-0.042021624	0.096425253	0.190244474	0.662713222	0.982981186	Not Sig	NA	NA	NA	NA	0	53413.7	0.93395675	13588.7	0.686070686
CITED2	NW_005081632.1	2489900	2491389	Adult Male	AMV	Adult Male Brain	130.7006943	0.001815437	0.10840218	0.000279715	0.986656246	0.997142447	Not Sig	636.2836063	0.104043493	0.117184628	0.787925426	0.374728169	0.891071953	Not Sig	NA	NA	NA	NA	0	53413.7	0.93395675	13588.7	0.686070686
CITED2	NW_005081632.1	2489900	2491389	Nestling Female	Hyp	Nestling Female Brain	164.5355186	0.184755098	0.127377655	2.090583453	0.148209458	0.239770995	Not Sig	836.7880509	0.007235848	0.082176505	0.008549331	0.926330512	0.996896415	Not Sig	NA	NA	NA	NA	0	53413.7	0.93395675	13588.7	0.686070686
CITED2	NW_005081632.1	2489900	2491389	Nestling Female	AMV	Nestling Female Brain	284.3969587	-0.222505741	0.137119627	2.608190135	0.106313032	0.200061797	Not Sig	1323.93997	0.106242808	0.227627405	0.217421923	0.641011344	0.996634902	Not Sig	NA	NA	NA	NA	0	53413.7	0.93395675	13588.7	0.686070686
CITED2	NW_005081632.1	2489900	2491389	Nestling Male	Hyp	Nestling Male Brain	191.2166824	-0.110612936	0.149905621	0.542667469	0.461329338	0.660855789	Not Sig	889.5994714	0.154203048	0.12880287	1.438458151	0.230389008	0.995064234	Not Sig	NA	NA	NA	NA	0	53413.7	0.93395675	13588.7	0.686070686
CITED2	NW_005081632.1	2489900	2491389	Nestling Male	AMV	Nestling Male Brain	324.866692	-0.02291988	0.144038889	0.025107518	0.874099443	0.933635628	Not Sig	1418.627969	0.289753772	0.240364084	1.467877709	0.225680842	0.73557116	Not Sig	NA	NA	NA	NA	0	53413.7	0.93395675	13588.7	0.686070686
CLDN20	NW_005081596.1	3368843	3374482	Adult Female	Hyp	Adult Female Brain	122.1750513	-0.629972066	0.242721465	6.545147406	0.010517061	0.031491258	Sig	478.2769069	-0.36945177	0.273394831	1.836166168	0.175400961	0.998912819	Not Sig	5639	NA	1	3	12	80684	0.472238457	12531.2	0.788981289
CLDN20	NW_005081596.1	3368843	3374482	Adult Female	AMV	Adult Female Brain	74.5550312	0.988693533	0.28019974	12.25290396	0.000464535	0.001769185	Sig	212.9749579	0.491924573	0.312792156	2.440955686	0.11820419	0.782325831	Not Sig	5639	NA	1	3	12	80684	0.472238457	12531.2	0.788981289
CLDN20	NW_005081596.1	3368843	3374482	Adult Male	Heart	Adult Male Horton et al	3.696470258	0.697143416	1.027767523	0.339952257	0.559856781	0.665214445	Not Sig	NA	NA	NA	NA	NA	NA	NA	5639	NA	1	3	12	80684	0.472238457	12531.2	0.788981289
CLDN20	NW_005081596.1	3368843	3374482	Adult Male	Liver	Adult Male Horton et al	4.040223455	-1.677885028	1.431871972	1.011087962	0.314642338	0.443121293	Not Sig	NA	NA	NA	NA	NA	NA	NA	5639	NA	1	3	12	80684	0.472238457	12531.2	0.788981289
CLDN20	NW_005081596.1	3368843	3374482	Adult Male	Hyp	Adult Male Brain	71.06678117	-0.393526945	0.174619448	4.971192658	0.02577287	0.054996063	Not Sig	269.1439067	-0.055945147	0.144305755	0.150387063	0.698165741	0.98678485	Not Sig	5639	NA	1	3	12	80684	0.472238457	12531.2	0.788981289
CLDN20	NW_005081596.1	3368843	3374482	Adult Male	AMV	Adult Male Brain	36.57856353	0.942815654	0.247285466	14.04026448	0.000178938	0.000572382	Sig	107.1217417	0.667390943	0.26576859	6.216931233	0.012653425	0.39164363	Not Sig	5639	NA	1	3	12	80684	0.472238457	12531.2	0.788981289
CLDN20	NW_005081596.1	3368843	3374482	Nestling Female	Hyp	Nestling Female Brain	116.307174	-0.389864095	0.154994341	6.267796851	0.012295193	0.027960779	Sig	370.3383131	0.14012325	0.291055414	0.231727678	0.63024573	0.988158743	Not Sig	5639	NA	1	3	12	80684	0.472238457	12531.2	0.788981289
CLDN20	NW_005081596.1	3368843	3374482	Nestling Female	AMV	Nestling Female Brain	9.766804818	-0.099142234	1.296463177	0.004053892	0.949232849	0.969847975	Not Sig	21.91175255	1.135868443	0.598500994	3.505131018	0.061179006	0.996634902	Not Sig	5639	NA	1	3	12	80684	0.472238457	12531.2	0.788981289
CLDN20	NW_005081596.1	3368843	3374482	Nestling Male	Hyp	Nestling Male Brain	145.7900476	0.271734661	0.294231848	0.771133197	0.379866717	0.587262124	Not Sig	495.1544236	0.145018347	0.30807105	0.222417242	0.637204241	1	Not Sig	5639	NA	1	3	12	80684	0.472238457	12531.2	0.788981289
CLDN20	NW_005081596.1	3368843	3374482	Nestling Male	AMV	Nestling Male Brain	4.991565707	0.786432194	1.249756285	0.370490647	0.542736945	0.717209084	Not Sig	18.53617947	0.110234716	0.785558685	0.019805112	0.888082743	0.9791377	Not Sig	5639	NA	1	3	12	80684	0.472238457	12531.2	0.788981289
CLIC5	NW_005081635.1	270103	329122	Adult Female	Hyp	Adult Female Brain	NA	NA	NA	NA	NA	NA	NA	2303.000488	0.690619061	0.192978186	12.51696378	0.000403274	0.071762037	Not Sig	NA	NA	NA	NA	0	NA	-1	NA	-1
CLIC5	NW_005081635.1	270103	329122	Adult Female	AMV	Adult Female Brain	NA	NA	NA	NA	NA	NA	NA	290.100884	0.287502052	0.228797358	1.567166415	0.210618997	0.871235487	Not Sig	NA	NA	NA	NA	0	NA	-1	NA	-1
CLIC5	NW_005081635.1	270103	329122	Adult Male	Heart	Adult Male Horton et al	NA	NA	NA	NA	NA	NA	NA	NA	NA	NA	NA	NA	NA	NA	NA	NA	NA	NA	0	NA	-1	NA	-1
CLIC5	NW_005081635.1	270103	329122	Adult Male	Liver	Adult Male Horton et al	NA	NA	NA	NA	NA	NA	NA	NA	NA	NA	NA	NA	NA	NA	NA	NA	NA	NA	0	NA	-1	NA	-1
CLIC5	NW_005081635.1	270103	329122	Adult Male	Hyp	Adult Male Brain	NA	NA	NA	NA	NA	NA	NA	665.5357817	-0.079165343	0.13333901	0.35276473	0.55255224	0.981669138	Not Sig	NA	NA	NA	NA	0	NA	-1	NA	-1
CLIC5	NW_005081635.1	270103	329122	Adult Male	AMV	Adult Male Brain	NA	NA	NA	NA	NA	NA	NA	166.6114424	0.321800716	0.268681178	1.42819788	0.232058771	0.812700387	Not Sig	NA	NA	NA	NA	0	NA	-1	NA	-1
CLIC5	NW_005081635.1	270103	329122	Nestling Female	Hyp	Nestling Female Brain	NA	NA	NA	NA	NA	NA	NA	973.7401824	0.570929488	0.283330014	4.035188315	0.044560702	0.562802859	Not Sig	NA	NA	NA	NA	0	NA	-1	NA	-1
CLIC5	NW_005081635.1	270103	329122	Nestling Female	AMV	Nestling Female Brain	NA	NA	NA	NA	NA	NA	NA	92.46652365	0.874568869	0.462658486	3.489623604	0.061754624	0.996634902	Not Sig	NA	NA	NA	NA	0	NA	-1	NA	-1
CLIC5	NW_005081635.1	270103	329122	Nestling Male	Hyp	Nestling Male Brain	NA	NA	NA	NA	NA	NA	NA	974.4257806	-0.163631078	0.313292324	0.271418748	0.602381648	0.997652922	Not Sig	NA	NA	NA	NA	0	NA	-1	NA	-1
CLIC5	NW_005081635.1	270103	329122	Nestling Male	AMV	Nestling Male Brain	NA	NA	NA	NA	NA	NA	NA	108.1198979	-0.500663397	0.588602129	0.707128456	0.400398746	0.824820338	Not Sig	NA	NA	NA	NA	0	NA	-1	NA	-1
CLIP4	NW_005081742.1	712854	745107	Adult Female	Hyp	Adult Female Brain	794.2900615	0.045087146	0.08450138	0.284401286	0.593830862	0.769563793	Not Sig	3413.176198	0.16311396	0.146216169	1.239890924	0.265492077	0.998912819	Not Sig	32253	NA	3	8	25	65419.16667	0.774271057	20524.46667	0.264033264
CLIP4	NW_005081742.1	712854	745107	Adult Female	AMV	Adult Female Brain	1518.313838	-0.211478098	0.071593047	8.702807347	0.003177204	0.010278062	Sig	6011.930495	0.136989832	0.186269569	0.539120037	0.46279764	0.963105262	Not Sig	32253	NA	3	8	25	65419.16667	0.774271057	20524.46667	0.264033264
CLIP4	NW_005081742.1	712854	745107	Adult Male	Heart	Adult Male Horton et al	679.8665317	1.695012472	0.045638886	1351.948005	5.81e-296	5.03e-293	Sig	NA	NA	NA	NA	NA	NA	NA	32253	NA	3	8	25	65419.16667	0.774271057	20524.46667	0.264033264
CLIP4	NW_005081742.1	712854	745107	Adult Male	Liver	Adult Male Horton et al	4.561843882	-1.046110531	0.868861271	1.107966967	0.292524312	0.4214919	Not Sig	NA	NA	NA	NA	NA	NA	NA	32253	NA	3	8	25	65419.16667	0.774271057	20524.46667	0.264033264
CLIP4	NW_005081742.1	712854	745107	Adult Male	Hyp	Adult Male Brain	381.1331991	0.012850075	0.073903669	0.030111752	0.862236908	0.919020493	Not Sig	1763.962005	0.134748905	0.076790283	3.073820693	0.079562278	0.784913494	Not Sig	32253	NA	3	8	25	65419.16667	0.774271057	20524.46667	0.264033264
CLIP4	NW_005081742.1	712854	745107	Adult Male	AMV	Adult Male Brain	645.5784918	-0.128329126	0.045280526	8.029392233	0.004602428	0.011380945	Sig	2952.710658	0.002370124	0.040723768	0.003393347	0.95354755	0.993668169	Not Sig	32253	NA	3	8	25	65419.16667	0.774271057	20524.46667	0.264033264
CLIP4	NW_005081742.1	712854	745107	Nestling Female	Hyp	Nestling Female Brain	387.2967287	-0.170841922	0.074695578	5.226889483	0.022240271	0.047848882	Sig	1727.207343	-0.086869508	0.164205789	0.279859417	0.596793375	0.98605262	Not Sig	32253	NA	3	8	25	65419.16667	0.774271057	20524.46667	0.264033264
CLIP4	NW_005081742.1	712854	745107	Nestling Female	AMV	Nestling Female Brain	425.7623674	-0.273228707	0.099741476	7.473280969	0.006262133	0.017757006	Sig	1652.309104	-0.173445825	0.120208809	2.086532468	0.148603029	0.996634902	Not Sig	32253	NA	3	8	25	65419.16667	0.774271057	20524.46667	0.264033264
CLIP4	NW_005081742.1	712854	745107	Nestling Male	Hyp	Nestling Male Brain	402.2163875	-0.216174066	0.116249169	3.438511906	0.063693036	0.142365007	Not Sig	1935.043946	-0.100831543	0.153664234	0.429301037	0.512332118	0.995064234	Not Sig	32253	NA	3	8	25	65419.16667	0.774271057	20524.46667	0.264033264
CLIP4	NW_005081742.1	712854	745107	Nestling Male	AMV	Nestling Male Brain	412.3836943	-0.236156235	0.148775984	2.484940849	0.11494067	0.225737368	Not Sig	1750.299002	-0.112947134	0.183922953	0.375321819	0.540117616	0.878262464	Not Sig	32253	NA	3	8	25	65419.16667	0.774271057	20524.46667	0.264033264
CLN6	NW_005082517.1	19235	32369	Adult Female	Hyp	Adult Female Brain	NA	NA	NA	NA	NA	NA	NA	1222.403241	-0.225176117	0.17182207	1.723480277	0.189245673	0.998912819	Not Sig	NA	NA	NA	NA	0	NA	-1	NA	-1
CLN6	NW_005082517.1	19235	32369	Adult Female	AMV	Adult Female Brain	NA	NA	NA	NA	NA	NA	NA	1082.315932	-0.059676889	0.103127424	0.335464028	0.562459247	0.983434407	Not Sig	NA	NA	NA	NA	0	NA	-1	NA	-1
CLN6	NW_005082517.1	19235	32369	Adult Male	Heart	Adult Male Horton et al	NA	NA	NA	NA	NA	NA	NA	NA	NA	NA	NA	NA	NA	NA	NA	NA	NA	NA	0	NA	-1	NA	-1
CLN6	NW_005082517.1	19235	32369	Adult Male	Liver	Adult Male Horton et al	NA	NA	NA	NA	NA	NA	NA	NA	NA	NA	NA	NA	NA	NA	NA	NA	NA	NA	0	NA	-1	NA	-1
CLN6	NW_005082517.1	19235	32369	Adult Male	Hyp	Adult Male Brain	NA	NA	NA	NA	NA	NA	NA	780.3280623	-0.060934544	0.08074335	0.570433606	0.450086664	0.970132487	Not Sig	NA	NA	NA	NA	0	NA	-1	NA	-1
CLN6	NW_005082517.1	19235	32369	Adult Male	AMV	Adult Male Brain	NA	NA	NA	NA	NA	NA	NA	625.4619927	0.027033872	0.090966155	0.088484463	0.766112761	0.975306535	Not Sig	NA	NA	NA	NA	0	NA	-1	NA	-1
CLN6	NW_005082517.1	19235	32369	Nestling Female	Hyp	Nestling Female Brain	NA	NA	NA	NA	NA	NA	NA	1241.746857	0.066759534	0.126212756	0.279738489	0.596872672	0.98605262	Not Sig	NA	NA	NA	NA	0	NA	-1	NA	-1
CLN6	NW_005082517.1	19235	32369	Nestling Female	AMV	Nestling Female Brain	NA	NA	NA	NA	NA	NA	NA	1218.305282	0.218202378	0.225207191	0.934578116	0.333676123	0.996634902	Not Sig	NA	NA	NA	NA	0	NA	-1	NA	-1
CLN6	NW_005082517.1	19235	32369	Nestling Male	Hyp	Nestling Male Brain	NA	NA	NA	NA	NA	NA	NA	1257.148474	-0.125946034	0.130115377	0.93330292	0.334006132	0.995064234	Not Sig	NA	NA	NA	NA	0	NA	-1	NA	-1
CLN6	NW_005082517.1	19235	32369	Nestling Male	AMV	Nestling Male Brain	NA	NA	NA	NA	NA	NA	NA	1152.357962	0.120997531	0.133573968	0.823926814	0.364034554	0.810598102	Not Sig	NA	NA	NA	NA	0	NA	-1	NA	-1
CLN8	NW_005081609.1	1545270	1552033	Adult Female	Hyp	Adult Female Brain	NA	NA	NA	NA	NA	NA	NA	NA	NA	NA	NA	NA	NA	NA	6763	NA	NA	1	19	NA	-1	NA	-1
CLN8	NW_005081609.1	1545270	1552033	Adult Female	AMV	Adult Female Brain	NA	NA	NA	NA	NA	NA	NA	NA	NA	NA	NA	NA	NA	NA	6763	NA	NA	1	19	NA	-1	NA	-1
CLN8	NW_005081609.1	1545270	1552033	Adult Male	Heart	Adult Male Horton et al	428.0964846	-0.361989463	0.055548335	42.21767698	8.17e-11	4.65e-10	Sig	NA	NA	NA	NA	NA	NA	NA	6763	NA	NA	1	19	NA	-1	NA	-1
CLN8	NW_005081609.1	1545270	1552033	Adult Male	Liver	Adult Male Horton et al	658.3781598	-0.116610769	0.041628305	7.829354329	0.005140446	0.012626967	Sig	NA	NA	NA	NA	NA	NA	NA	6763	NA	NA	1	19	NA	-1	NA	-1
CLN8	NW_005081609.1	1545270	1552033	Adult Male	Hyp	Adult Male Brain	1113.508324	0.016379307	0.036512805	0.201143388	0.653799515	0.772805719	Not Sig	NA	NA	NA	NA	NA	NA	NA	6763	NA	NA	1	19	NA	-1	NA	-1
[truncated: 9,775 more rows]
