# Supplementary material for: Dynamic molecular evolution of a supergene with suppressed recombination in white-throated sparrows
Source: eLife. 2022 Aug 30;11:e79387. doi: 10.7554/eLife.79387 (PMC9427109; doi:10.7554/eLife.79387)
Supplement: Supplementary file 3. [file elife-79387-supp3.xlsx]

## Sheet: Sheet1
		TS Assembly1		SWS assembly
Longest scaffold		45240865		27536075
Number of scaffolds > 1K nt		5673		14669
Number of scaffolds > 10K nt		1611		2092
Number of scaffolds > 100K nt		535		672
Number of scaffolds > 1M nt		210		244
Number of scaffolds > 10M nt		18		13
N50 scaffold length		4866725		3189904
L50 scaffold count		52		81
N50 contig length		116237		216976
L50 contig count		2295		1331
			1 Tuttle et al., 2016
