# Supplementary material for: Dynamic molecular evolution of a supergene with suppressed recombination in white-throated sparrows
Source: eLife. 2022 Aug 30;11:e79387. doi: 10.7554/eLife.79387 (PMC9427109; doi:10.7554/eLife.79387)
Supplement: Supplementary file 6. [file elife-79387-supp6.xlsx]

## Sheet: Males_Hyp_WvsT
gene_name	baseMean	log2FoldChange	lfcSE	stat	pvalue	padj	CHROM	Start	End	Strand	Zfinch_Chromosome	ZAL3	ZAL2
AARS2	1309.17	-0.47129	0.0501986	88.3083	5.60088e-21	1.09697e-17	NW_005081620.1	536276	552865	+	3	Genome	Chr2
ABCB10	514.666	-0.332838	0.0686748	23.5181	1.23745e-06	0.000282757	NW_005081653.1	498650	521597	-	3	Genome	Chr2
ABCC10	732.142	-0.381692	0.108601	12.3686	0.000436619	0.0391245	NW_005081574.1	3886189	3903757	-	3	Genome	Chr2
ACAT2	1160.49	-0.195539	0.0482161	16.4799	4.91682e-05	0.00664265	NW_005081596.1	621378	630224	-	3	Genome	Chr2
ACSS1	58.6821	0.852769	0.220318	14.8027	0.000119366	0.0137522	NW_005081577.1	414432	447854	+	3	Genome	Chr2
ACTN2	101.657	-0.815771	0.231891	12.3452	0.000442121	0.0393603	NW_005081589.1	2380882	2462749	-	3	Genome	Chr2
ADI1	1821.11	-0.452954	0.0527017	73.9868	7.86399e-18	1.07815e-14	NW_005081582.1	3781916	3787434	+	3	Genome	Chr2
AGPAT3	6398.56	0.0995283	0.0266322	13.9509	0.000187645	0.0193429	NW_005081607.1	2131899	2227072	+	1	Chr3	Genome
AGT	48923.6	-0.376956	0.0556201	46.0129	1.17477e-11	6.44243e-09	NW_005081653.1	922303	933218	-	3	Genome	Chr2
AKT3	4584.6	-0.158319	0.0421823	14.1042	0.000172959	0.0182405	NW_005081620.1	1871641	2006775	-	3	Genome	Chr2
ALKAL2	775.205	-0.384818	0.0894629	18.5439	1.66039e-05	0.00277608	NW_005081609.1	581075	594005	+	3	Genome	Chr2
AMD1	10110.9	0.178369	0.0457305	15.1736	9.80661e-05	0.0116912	NW_005081561.1	826729	844066	-	3	Genome	Chr2
APMAP	3057.8	0.372983	0.100614	13.6464	0.000220664	0.0220825	NW_005081602.1	3550574	3561021	+	3	Genome	Chr2
ASCC3	1070.56	0.296688	0.0655666	20.3906	6.31382e-06	0.00118579	NW_005081553.1	9182502	9441284	-	3	Genome	Chr2
BEND6	870.625	-0.576305	0.109966	27.4843	1.58373e-07	4.34258e-05	NW_005081569.1	4823934	4846725	-	3	Genome	Chr2
BPNT1	2024.15	0.261877	0.0409042	40.8721	1.62525e-10	7.95793e-08	NW_005081548.1	491857	500068	+	3	Genome	Chr2
BROX	4741.96	0.111945	0.0316209	12.5176	0.000403137	0.0366027	NW_005081821.1	310511	327948	-	3	Genome	Chr2
C1D	840.792	-0.317945	0.0640618	24.6855	6.74913e-07	0.000165233	NW_005081615.1	3254190	3268208	-	3	Genome	Chr2
CAV2	587.877	-0.374709	0.0962768	15.1818	9.76387e-05	0.0116912	NW_005081543.1	13401247	13410106	-	1A	Genome	Genome
CCDC167	291.574	0.46361	0.111341	17.2284	3.31447e-05	0.00485164	NW_005081620.1	480360	493512	+	3	Genome	Chr2
CD109	779.655	0.62698	0.135969	20.9661	4.67492e-06	0.000942546	NW_005081654.1	977479	1047341	+	3	Genome	Chr2
CDC42BPA	7535.59	-0.128789	0.0330816	15.174	9.80427e-05	0.0116912	NW_005081602.1	529240	712881	+	3	Genome	Chr2
CEBPZ	2446.97	-0.320624	0.0362567	78.3597	8.58864e-19	1.30834e-15	NW_005081699.1	828737	843152	-	3	Genome	Chr2
CENPF	73.8653	1.72977	0.176074	94.6598	2.2609e-22	5.16615e-19	NW_005081548.1	2767537	2801628	-	3	Genome	Chr2
CEP192	975.448	-0.361129	0.0805344	20.1408	7.19463e-06	0.00133295	NW_005081576.1	4180757	4240080	+	2	Genome	Genome
CEP57L1	68.1142	1.28036	0.320629	15.3841	8.77238e-05	0.0107383	NW_005081561.1	1561326	1585093	-	3	Genome	Chr2
CFAP161	1400.09	-0.230612	0.0649067	12.6422	0.000377128	0.0347008	NW_005081550.1	3514292	3521025	-	10	Genome	Genome
CFAP61	344.331	-0.430812	0.115602	13.9015	0.000192646	0.0197103	NW_005081577.1	671217	753647	+	3	Genome	Chr2
CMPK2	306.445	-0.976412	0.109582	79.2539	5.46181e-19	9.36017e-16	NW_005081582.1	2460384	2467571	+	3	Genome	Chr2
CNR1	9418.31	0.953111	0.122874	58.4575	2.07726e-14	1.89862e-11	NW_005081569.1	4312018	4330605	-	3	Genome	Chr2
COQ8A	2176.06	-0.388995	0.0627761	38.459	5.59155e-10	2.47291e-07	NW_005081602.1	715342	758552	-	3	Genome	Chr2
DISC1	452.583	-0.485186	0.0944543	26.4272	2.73658e-07	7.21511e-05	NW_005081589.1	4313836	4447333	-	3	Genome	Chr2
DNAJC10	2440.26	0.214312	0.0600581	12.6948	0.000366678	0.0339673	NW_005081554.1	6992710	7014785	+	7	Genome	Genome
EDARADD	277.973	0.415214	0.0901787	21.096	4.36838e-06	0.000893888	NW_005081589.1	2521104	2534395	-	3	Genome	Chr2
EFEMP1	1485.05	-0.618441	0.115908	28.4742	9.49574e-08	2.76993e-05	NW_005081577.1	2056151	2100841	-	3	Genome	Chr2
EHD3	10490.2	-0.12126	0.030199	16.1421	5.87639e-05	0.00767288	NW_005081602.1	363343	392669	+	3	Genome	Chr2
EPHA7	1754.75	-0.314122	0.0892008	12.4232	0.000424027	0.0382461	NW_005081553.1	6061424	6224456	-	3	Genome	Chr2
EPM2A	1301.95	0.697598	0.0570878	147.4	6.41651e-34	2.93234e-30	NW_005081611.1	1301773	1330662	+	3	Genome	Chr2
FERMT1	185.805	0.762597	0.109196	48.3467	3.57151e-12	2.19101e-09	NW_005081577.1	4064865	4083366	-	3	Genome	Chr2
FIG4	1328.87	-0.428414	0.0515007	69.2893	8.50305e-17	9.71474e-14	NW_005081561.1	1317339	1372551	-	3	Genome	Chr2
FMN2	3106.37	-0.146314	0.0396883	13.6056	0.00022551	0.022404	NW_005081589.1	920023	1071952	-	3	Genome	Chr2
FUCA2	506.743	-0.366655	0.0765677	22.9893	1.62905e-06	0.00036023	NW_005081632.1	926890	938315	+	3	Genome	Chr2
GAA	687.829	-0.363618	0.0893784	16.5806	4.66267e-05	0.00659023	NW_005082053.1	75332	81882	-	18	Genome	Genome
GLO1	5313.84	-0.235376	0.0597729	15.5347	8.10041e-05	0.0100961	NW_005081548.1	11696849	11704220	+	3	Genome	Chr2
GNPAT	2892.48	-0.141888	0.0361632	15.4118	8.64446e-05	0.0106771	NW_005081653.1	1159608	1179847	+	3	Genome	Chr2
GPATCH11	1478.71	0.249929	0.0562121	19.7082	9.02115e-06	0.00164907	NW_005081574.1	4966422	4981314	-	3	Genome	Chr2
GPR63	1411.73	-0.271416	0.0715387	14.4188	0.000146332	0.0161791	NW_005081553.1	7366422	7379617	-	3	Genome	Chr2
GSTCD	635.298	0.415664	0.102014	16.4889	4.89355e-05	0.00664265	NW_005081558.1	6807485	6853589	-	4	Genome	Genome
HEY2	1006.48	-0.310963	0.0607867	26.2095	3.06316e-07	7.92377e-05	NW_005081591.1	2229291	2240672	-	3	Genome	Chr2
HINT3	1982.15	-0.206065	0.0483355	18.208	1.98041e-05	0.00315715	NW_005081591.1	2124662	2131554	-	3	Genome	Chr2
HP1BP3	1967.17	-0.13544	0.0343262	15.5868	7.8803e-05	0.00991183	NW_005081906.1	226012	238994	-	21	Genome	Genome
HPS5	488.349	0.371661	0.101425	13.3533	0.00025797	0.0250835	NW_005081575.1	2205333	2236927	+	5	Genome	Genome
HTR1E	141.602	-0.790588	0.198856	15.7616	7.18466e-05	0.00912052	NW_005081569.1	3831418	3867770	+	3	Genome	Chr2
IARS2	2915.51	0.200317	0.0498858	16.082	6.06583e-05	0.00784552	NW_005081548.1	461922	487724	-	3	Genome	Chr2
IGF2R	2521.69	0.177526	0.0304476	33.9485	5.65913e-09	2.13095e-06	NW_005081596.1	504656	560828	-	3	Genome	Chr2
IYD	15.1487	2.59167	0.540671	21.36	3.80625e-06	0.000802827	NW_005081596.1	1198166	1216693	+	3	Genome	Chr2
KCNK5	383.99	-0.47358	0.123736	14.6715	0.000127963	0.014499	NW_005081548.1	11381424	11416202	+	3	Genome	Chr2
KIF25	548.641	0.553068	0.152062	13.0727	0.00029963	0.0285273	NW_005081574.1	309193	350508	-	3	Genome	Chr2
LOC102060438	1151.08	-0.373894	0.0497725	56.5246	5.55001e-14	4.47592e-11	NW_005081574.1	3737471	3748682	+	3	Genome	Chr2
LOC102061438	484.283	-0.321634	0.0865639	13.8285	0.000200274	0.0202664	NW_005081558.1	7501359	7508603	+	4	Genome	Genome
LOC102062779	29.8628	1.87733	0.251623	55.6532	8.64525e-14	6.5848e-11	NW_005081611.1	3023100	3039444	-	3	Genome	Chr2
LOC102063416	822.269	-0.268763	0.064842	17.2014	3.36182e-05	0.00485164	NW_005081577.1	5398826	5404127	+	3	Genome	Chr2
LOC102063741	729.928	3.06331	0.733118	14.5013	0.000140064	0.015612	NW_005081766.1	447280	456669	-	27	Genome	Genome
LOC102065273	1564.11	-0.323958	0.0682386	22.5768	2.01912e-06	0.0004394	NW_005081577.1	1893007	1897379	+	3	Genome	Chr2
LOC102065572	406.058	-0.346644	0.0760223	20.8367	5.00163e-06	0.000993802	NW_005081561.1	7401446	7408275	+	3	Genome	Chr2
LOC102066018	503.153	0.866733	0.170938	25.1231	5.3785e-07	0.000134071	NW_005081602.1	3684267	3691625	+	3	Genome	Chr2
LOC102066248	1658.42	-0.225691	0.0549406	16.9009	3.9383e-05	0.00562438	NW_005081569.1	6382106	6391140	+	3	Genome	Chr2
LOC102067572	212.971	0.508962	0.131051	14.9728	0.000109073	0.0126728	NW_005081921.1	175004	207193	+	13	Genome	Genome
LOC102068329	441.77	-0.274558	0.076762	12.8096	0.000344838	0.0321614	NW_005081589.1	3296856	3298685	-	3	Genome	Chr2
LOC102068570	64.9118	0.887446	0.212369	17.215	3.33798e-05	0.00485164	NW_005081615.1	3556	5915	-	3	Genome	Chr2
LOC102071011	309.883	0.528347	0.115477	20.7319	5.28292e-06	0.0010347	NW_005081616.1	1758712	1771610	+	9	Genome	Genome
LOC102074112	528.06	-0.756712	0.0968697	61.0065	5.68855e-15	5.99923e-12	NW_005081642.1	439799	444037	-	3	Genome	Chr2
LOC102074665	2736.82	-0.310319	0.0625804	24.6349	6.92839e-07	0.000166646	NW_005081620.1	2304231	2306462	+	3	Genome	Chr2
LOC106629369	35.2039	1.26085	0.311439	15.9662	6.44844e-05	0.00826244	NA	NA	NA	NA	NA	NA	NA
LOC106629396	31.3048	2.1751	0.257849	71.1676	3.2813e-17	4.08969e-14	NA	NA	NA	NA	NA	NA	NA
LOC106629504	792.394	-0.345268	0.0646605	28.5488	9.13655e-08	2.72309e-05	NA	NA	NA	NA	NA	NA	NA
LOC113458746	182.403	-0.549615	0.136804	16.1787	5.76384e-05	0.00759829	NA	NA	NA	NA	NA	NA	NA
LOC113458752	236.887	-0.97849	0.270706	12.9881	0.000313479	0.0296399	NA	NA	NA	NA	NA	NA	NA
LOC113458759	22.8706	2.21197	0.31644	48.236	3.77882e-12	2.19101e-09	NA	NA	NA	NA	NA	NA	NA
LOC113458862	410.949	0.458828	0.0934636	23.941	9.93335e-07	0.000234804	NW_005081553.1	7662258	7822646	+	3	Genome	Chr2
LOC113458864	44.8125	7.91122	0.715014	317.342	5.49394e-71	7.53219e-67	NA	NA	NA	NA	NA	NA	NA
LOC113459042	107.966	-1.14397	0.190008	36.0755	1.89822e-09	7.88623e-07	NA	NA	NA	NA	NA	NA	NA
LOC113459045	24.1268	-1.02006	0.272042	14.1196	0.000171551	0.0182323	NA	NA	NA	NA	NA	NA	NA
LOC113459138	29.2962	-1.84599	0.27943	43.6991	3.82951e-11	2.01933e-08	NA	NA	NA	NA	NA	NA	NA
LOC113459215	208.927	0.532672	0.127421	17.3408	3.12407e-05	0.00465555	NA	NA	NA	NA	NA	NA	NA
LOC113459313	7.06237	3.20715	0.72553	18.9639	1.33212e-05	0.00237187	NA	NA	NA	NA	NA	NA	NA
LOC113459358	29.132	1.60166	0.253209	39.7413	2.89931e-10	1.37068e-07	NA	NA	NA	NA	NA	NA	NA
LOC113459407	147.907	-0.99246	0.243194	16.5487	4.74174e-05	0.0066336	NA	NA	NA	NA	NA	NA	NA
LOC113459444	117.881	1.3583	0.214624	38.547	5.34512e-10	2.44272e-07	NW_005081599.1	2064557	2065688	-	Z	Genome	Genome
LOC113459462	23.526	1.82551	0.311173	33.811	6.07338e-09	2.19121e-06	NA	NA	NA	NA	NA	NA	NA
LOC113459466	14.1475	3.80731	0.686774	28.1436	1.1264e-07	3.21729e-05	NA	NA	NA	NA	NA	NA	NA
LOC113459573	126.293	1.05504	0.15058	48.2068	3.83546e-12	2.19101e-09	NA	NA	NA	NA	NA	NA	NA
LOC113459574	50.3955	2.03894	0.258765	59.4081	1.2814e-14	1.25485e-11	NA	NA	NA	NA	NA	NA	NA
LOC113459616	84.8576	-0.930137	0.193234	23.1565	1.49334e-06	0.000335634	NA	NA	NA	NA	NA	NA	NA
LOC113459726	98.1148	-0.891007	0.196571	20.5391	5.84244e-06	0.00112817	NA	NA	NA	NA	NA	NA	NA
LOC113460087	2178.8	-0.136857	0.0395635	11.9792	0.000537975	0.0474422	NA	NA	NA	NA	NA	NA	NA
LOC113460451	331.129	4.45283	0.895136	18.0377	2.16568e-05	0.00341281	NA	NA	NA	NA	NA	NA	NA
LRRTM3	798.592	0.691702	0.126553	29.3999	5.88816e-08	1.87737e-05	NW_005081651.1	915525	917551	+	6	Genome	Genome
LTBP1	436.975	-0.737579	0.102238	52.0119	5.51664e-13	3.98069e-10	NW_005081574.1	4046046	4231553	-	3	Genome	Chr2
LTV1	1658.51	0.234816	0.0541851	18.7239	1.51076e-05	0.00258906	NW_005081632.1	775138	785102	-	3	Genome	Chr2
MAP3K5	843.431	0.319295	0.05764	30.5784	3.20636e-08	1.07217e-05	NW_005081611.1	2465623	2563486	-	3	Genome	Chr2
MAP3K7	3820.7	0.224573	0.0415264	29.1559	6.67831e-08	2.0809e-05	NW_005081553.1	4949665	4997583	-	3	Genome	Chr2
MBOAT2	17827.2	-0.101505	0.0271392	14.0026	0.000182559	0.0189612	NW_005081582.1	1448661	1524206	+	3	Genome	Chr2
MCFD2	4864.83	-0.18101	0.0391181	21.4457	3.63984e-06	0.000779723	NW_005081548.1	8972599	8978247	-	3	Genome	Chr2
MEA1	3292.71	-0.151988	0.0439903	11.9525	0.000545728	0.0476556	NW_005081577.1	98242	99572	+	3	Genome	Chr2
MGME1	220.13	-0.5558	0.105852	27.5876	1.50141e-07	4.20087e-05	NW_005081602.1	3903835	3911455	+	3	Genome	Chr2
MKKS	2343.64	-0.238357	0.0587319	16.4957	4.87612e-05	0.00664265	NW_005081577.1	5535192	5542568	-	3	Genome	Chr2
MOV10L1	19.4489	-2.25706	0.637113	11.9728	0.000539824	0.0474422	NW_005081543.1	8442809	8473763	+	1A	Genome	Genome
MRPS18A	1311.33	0.256476	0.03581	51.2254	8.23471e-13	5.6449e-10	NW_005081620.1	1237874	1260176	+	3	Genome	Chr2
MSH2	702.075	0.233695	0.053904	18.7625	1.48052e-05	0.00256935	NW_005081662.1	70957	119370	+	3	Genome	Chr2
MTO1	1513.88	-0.144789	0.0345148	17.6091	2.71287e-05	0.00408719	NW_005081654.1	898118	905255	+	3	Genome	Chr2
NBAS	2309.33	0.123545	0.0343442	12.9235	0.000324476	0.0304696	NW_005081621.1	1454601	1615580	+	3	Genome	Chr2
NENF	1361.38	-0.252886	0.0588916	18.4729	1.72333e-05	0.00284661	NW_005081548.1	3728264	3732969	-	3	Genome	Chr2
NTPCR	1466.51	-0.853217	0.0600887	201.243	1.11863e-45	7.66822e-42	NW_005081589.1	3852325	3866096	-	3	Genome	Chr2
NTRK2	24227.1	0.126412	0.0300842	17.6255	2.6896e-05	0.00408719	NW_005081623.1	647185	845977	+	Z	Genome	Genome
NUS1	2323.52	0.123742	0.0340336	13.2062	0.000279026	0.0267514	NW_005081697.1	10636	20458	+	3	Genome	Chr2
OLIG3	17.0784	1.74602	0.345377	25.3751	4.71982e-07	0.000119831	NW_005081611.1	2841670	2843721	-	3	Genome	Chr2
PEX13	1513.9	-0.227883	0.0504147	20.4615	6.08438e-06	0.00115857	NW_005081577.1	3731883	3739248	+	3	Genome	Chr2
PM20D2	2290.57	-0.363601	0.0677858	28.8184	7.94916e-08	2.42184e-05	NW_005081569.1	4687362	4703770	+	3	Genome	Chr2
PNRC1	2108.13	-0.15818	0.0420973	14.1384	0.000169837	0.0181911	NW_005081569.1	4659267	4661603	+	3	Genome	Chr2
POLR1B	675.094	-0.315649	0.0606001	27.1598	1.87316e-07	5.03548e-05	NW_005081577.1	255139	266783	-	3	Genome	Chr2
PPIL4	1357.19	-0.277266	0.0366339	57.3586	3.63168e-14	3.11189e-11	NW_005081589.1	347047	368961	-	3	Genome	Chr2
PREPL	789.288	-0.346441	0.10049	11.9013	0.000560948	0.0486747	NW_005081548.1	7454449	7481033	-	3	Genome	Chr2
PRRG4	99.027	0.709769	0.191812	13.5282	0.000235008	0.0231795	NW_005081652.1	831035	839412	+	5	Genome	Genome
PTRH1	79.7811	-0.642451	0.148392	18.8089	1.4449e-05	0.0025397	NW_005081640.1	1723471	1725261	+	17	Genome	Genome
RBM38	559.062	-0.299783	0.0794141	14.2767	0.000157803	0.0171705	NW_005081608.1	632097	645399	+	20	Genome	Genome
RIPPLY2	1003.12	-0.206876	0.0472225	19.214	1.16854e-05	0.00210798	NW_005081569.1	2883891	2891403	+	3	Genome	Chr2
RMDN2	505.855	0.319914	0.0836453	14.5649	0.000135411	0.0152171	NW_005081574.1	4799225	4849883	+	3	Genome	Chr2
RNASEH1	1206.04	-0.228057	0.0562816	16.4517	4.99046e-05	0.00664265	NW_005081582.1	3773052	3780144	+	3	Genome	Chr2
RNF144A	3712.18	0.338892	0.0340357	98.6846	2.961e-23	8.11905e-20	NW_005081582.1	2381842	2444090	-	3	Genome	Chr2
RRP36	2648.37	-0.307722	0.0532388	33.4634	7.26188e-09	2.55283e-06	NW_005081577.1	64393	71382	-	3	Genome	Chr2
SCG2	101833	0.237029	0.0646812	13.3757	0.000254901	0.024962	NW_005081614.1	1674677	1680392	+	9	Genome	Genome
SEC11C	3082.68	0.219139	0.051069	18.3558	1.8326e-05	0.00295588	NW_005081874.1	326349	330589	+	Z	Genome	Genome
SH3YL1	211.835	-0.313718	0.0810275	15.0023	0.000107381	0.0125829	NW_005081609.1	617157	662650	+	3	Genome	Chr2
SHLD1	23738.1	0.269732	0.0639717	17.6958	2.59205e-05	0.00399292	NW_005081615.1	754300	788076	+	3	Genome	Chr2
SLC35B2	1493.32	-0.382022	0.0644713	35.1704	3.02084e-09	1.18331e-06	NW_005081620.1	624805	630419	+	3	Genome	Chr2
SLC4A1AP	955.536	-0.202585	0.0528644	14.712	0.000125247	0.0143095	NW_005081548.1	9881845	9897824	-	3	Genome	Chr2
SMIM8	486.997	0.775824	0.131984	33.9172	5.75093e-09	2.13095e-06	NW_005081569.1	3993069	3996668	+	3	Genome	Chr2
SMYD3	248.02	0.458505	0.106507	18.4423	1.75124e-05	0.00285827	NW_005081620.1	2690069	3073244	-	3	Genome	Chr2
SNTG2	261.17	0.896588	0.236564	14.0196	0.000180917	0.0189341	NW_005081582.1	4787189	4915546	-	3	Genome	Chr2
SOBP	2259.4	-0.186245	0.0479355	15.1161	0.000101095	0.0119484	NW_005081561.1	2286782	2400657	-	3	Genome	Chr2
SORBS1	3100.19	0.422123	0.0996143	17.8064	2.44559e-05	0.00381012	NW_005081541.1	12109507	12181377	-	6	Genome	Genome
SRBD1	449.877	0.340303	0.0899722	14.239	0.000161003	0.0173807	NW_005081548.1	8098943	8223451	-	3	Genome	Chr2
TAF5L	1865.74	-0.555813	0.0529757	110.164	9.02325e-26	3.09272e-22	NW_005081653.1	530522	546109	-	3	Genome	Chr2
TBXT	83.5124	-0.504573	0.138926	13.2075	0.000278825	0.0267514	NW_005081574.1	1257637	1265694	+	3	Genome	Chr2
TCTE1	78.0662	1.02066	0.248505	16.4535	4.98578e-05	0.00664265	NW_005081620.1	567499	583297	+	3	Genome	Chr2
TGFB2	1245.79	0.344129	0.0562902	37.2047	1.06356e-09	4.55668e-07	NW_005081548.1	1053944	1113953	-	3	Genome	Chr2
TMEM18	783.821	-0.386652	0.0554405	48.7544	2.90105e-12	1.89397e-09	NW_005081609.1	410462	413193	+	3	Genome	Chr2
TMEM181	5933.06	0.238568	0.0396886	36.0084	1.96466e-09	7.92222e-07	NW_005081632.1	512091	534209	+	3	Genome	Chr2
TPBG	2002.89	0.289078	0.0763064	14.2836	0.000157232	0.0171705	NW_005081569.1	2243461	2250786	+	3	Genome	Chr2
TRAPPC3L	272.783	-0.776477	0.118001	43.2715	4.76464e-11	2.41938e-08	NW_005081642.1	429188	446676	+	3	Genome	Chr2
UFL1	1401.93	0.208571	0.0560252	13.8214	0.000201038	0.0202664	NW_005081553.1	7271835	7293309	+	3	Genome	Chr2
URB2	418.499	-0.352233	0.0764869	21.2525	4.02592e-06	0.000836294	NW_005081653.1	550298	569557	+	3	Genome	Chr2
UST	781.89	-0.352901	0.0817398	18.6764	1.54887e-05	0.00262161	NW_005081589.1	91739	188548	+	3	Genome	Chr2
VTA1	2209.23	0.285282	0.0510505	31.1068	2.44214e-08	8.37043e-06	NW_005081632.1	1512443	1551579	-	3	Genome	Chr2
WDR27	199.715	-0.624519	0.115178	29.4202	5.82678e-08	1.87737e-05	NW_005081653.1	1648459	1738823	+	3	Genome	Chr2
WDR92	404.567	-0.410963	0.0847054	23.5856	1.19479e-06	0.000277636	NW_005081615.1	3278980	3286065	-	3	Genome	Chr2
YPEL5	15044	0.12941	0.036399	12.6181	0.000382033	0.0349178	NW_005081742.1	301560	313956	-	3	Genome	Chr2

## Sheet: Males_AMV_WvsT
gene_name	baseMean	log2FoldChange	lfcSE	stat	pvalue	padj	CHROM	Start	End	Strand	Zfinch_Chromosome	ZAL3	ZAL2
AARS2	1357.11	-0.500604	0.0454148	121.639	2.77e-28	1.31e-24	NW_005081620.1	536276	552865	+	3	Genome	Chr2
ABCB10	367.136	-0.518719	0.0769306	45.5438	1.49e-11	1.12e-08	NW_005081653.1	498650	521597	-	3	Genome	Chr2
ADI1	1889.59	-0.366087	0.0789839	21.528	3.49e-06	0.00124041	NW_005081582.1	3781916	3787434	+	3	Genome	Chr2
AGT	59829	-0.302423	0.0697593	18.8292	1.43e-05	0.00412131	NW_005081653.1	922303	933218	-	3	Genome	Chr2
ALKAL2	703.492	-0.599585	0.0781918	58.8612	1.69e-14	1.6e-11	NW_005081609.1	581075	594005	+	3	Genome	Chr2
APLF	202.225	-0.563125	0.135328	17.3347	3.13e-05	0.00737487	NW_005081615.1	3400348	3421032	+	3	Genome	Chr2
APMAP	1084.08	0.438215	0.103356	17.8295	2.42e-05	0.00603122	NW_005081602.1	3550574	3561021	+	3	Genome	Chr2
ARID1B	2264.13	-0.234794	0.0574881	16.7058	4.36e-05	0.0090646	NW_005081596.1	3963850	4255992	+	3	Genome	Chr2
ARPC1A	5670.91	0.195865	0.0535906	13.3198	0.00026262	0.0359315	NW_005081585.1	4448393	4465057	+	14	Genome	Genome
ASCC3	782.557	0.311533	0.085852	13.105	0.00029451	0.0388012	NW_005081553.1	9182502	9441284	-	3	Genome	Chr2
B3GALNT2	1135.48	0.298558	0.0807947	13.5942	0.00022689	0.0326581	NW_005081589.1	2839206	2858355	+	3	Genome	Chr2
BCL2L1	5301.5	0.235677	0.0650912	13.0616	0.00030141	0.0393464	NW_005081656.1	953093	970201	-	20	Genome	Genome
BEND6	1018.17	-0.687081	0.130889	27.5363	1.54e-07	6.65e-05	NW_005081569.1	4823934	4846725	-	3	Genome	Chr2
BICRAL	1647.9	-0.220824	0.0547152	16.3088	5.38e-05	0.0103475	NW_005081548.1	4948887	4994562	+	3	Genome	Chr2
BPNT1	1603.2	0.276639	0.0478473	33.3179	7.83e-09	3.98e-06	NW_005081548.1	491857	500068	+	3	Genome	Chr2
BTBD3	7905.43	0.342842	0.0616886	30.696	3.02e-08	1.43e-05	NW_005081602.1	3423342	3434195	-	3	Genome	Chr2
C1D	776.554	-0.372768	0.0609994	37.4195	9.53e-10	5.65e-07	NW_005081615.1	3254190	3268208	-	3	Genome	Chr2
CCDC167	249.28	0.533229	0.13246	16.0687	6.11e-05	0.0115893	NW_005081620.1	480360	493512	+	3	Genome	Chr2
CCR6	57.7685	0.777926	0.217503	12.6237	0.00038089	0.0437597	NW_005081574.1	753056	765468	-	3	Genome	Chr2
CD109	576.138	1.75914	0.199076	72.6713	1.53e-17	2.42e-14	NW_005081654.1	977479	1047341	+	3	Genome	Chr2
CDC42BPA	5912.93	-0.209196	0.0548215	14.584	0.00013405	0.0217715	NW_005081602.1	529240	712881	+	3	Genome	Chr2
CEBPZ	2220.97	-0.423881	0.0479206	78.3797	8.5e-19	1.73e-15	NW_005081699.1	828737	843152	-	3	Genome	Chr2
CENPF	154.252	1.51425	0.1652	80.7626	2.55e-19	6.04e-16	NW_005081548.1	2767537	2801628	-	3	Genome	Chr2
CEP162	866.046	-0.326895	0.0920878	12.6214	0.00038135	0.0437597	NW_005081569.1	2968920	3013377	-	3	Genome	Chr2
CEP57L1	37.1458	2.28492	0.258214	76.7556	1.93e-18	3.44e-15	NW_005081561.1	1561326	1585093	-	3	Genome	Chr2
CMPK2	121.101	-0.789627	0.213972	13.5914	0.00022722	0.0326581	NW_005081582.1	2460384	2467571	+	3	Genome	Chr2
CNST	1554.83	0.334798	0.052539	40.4042	2.07e-10	1.34e-07	NW_005081620.1	3091761	3144565	+	3	Genome	Chr2
COQ8A	2062.39	-0.40549	0.0942866	18.5244	1.68e-05	0.00452841	NW_005081602.1	715342	758552	-	3	Genome	Chr2
CPSF3	897.846	-0.180766	0.043639	17.1844	3.39e-05	0.00766148	NW_005081582.1	1254877	1273884	-	3	Genome	Chr2
DISC1	418.137	-0.648371	0.125343	26.7718	2.29e-07	9.31e-05	NW_005081589.1	4313836	4447333	-	3	Genome	Chr2
DLG5	3181.88	-0.232484	0.0633182	13.5035	0.00023812	0.0337056	NW_005081541.1	15170675	15231612	-	6	Genome	Genome
EHD3	13366.9	-0.21241	0.0326157	42.481	7.14e-11	4.84e-08	NW_005081602.1	363343	392669	+	3	Genome	Chr2
EPM2A	875.336	0.613577	0.100201	37.026	1.17e-09	6.63e-07	NW_005081611.1	1301773	1330662	+	3	Genome	Chr2
FGFR1OP	1192.29	-0.234808	0.0628564	13.9798	0.00018479	0.0282727	NW_005081574.1	777519	801004	-	3	Genome	Chr2
FIG4	709.952	-0.309721	0.0745333	17.2999	3.19e-05	0.00737487	NW_005081561.1	1317339	1372551	-	3	Genome	Chr2
FNDC1	132.001	1.18404	0.207726	31.4894	2.01e-08	9.84e-06	NW_005081596.1	819771	882154	-	3	Genome	Chr2
FOXO3	2294.26	-0.312256	0.0805222	15.0668	0.00010377	0.0175786	NW_005081561.1	1808903	1824873	-	3	Genome	Chr2
GALNT18	3263.09	0.222547	0.0623069	12.7166	0.00036243	0.0433367	NW_005081652.1	2217994	2427835	-	5	Genome	Genome
GDPD4	67.5154	0.677174	0.188405	12.8145	0.00034395	0.0421897	NW_005081836.1	282704	321494	+	1	Chr3	Genome
GJD2	718.606	-0.421683	0.119664	12.4333	0.00042175	0.0472521	NW_005081537.1	9452459	9456941	-	5	Genome	Genome
GLP1R	364.553	0.388368	0.0819182	22.3925	2.22e-06	0.00083216	NW_005081548.1	11484788	11568286	-	3	Genome	Chr2
GPATCH11	1489.06	0.345459	0.0662653	27.0332	2e-07	8.37e-05	NW_005081574.1	4966422	4981314	-	3	Genome	Chr2
GRM1	655.789	-0.726192	0.185851	15.2473	9.43e-05	0.0163657	NW_005081611.1	974929	1160117	-	3	Genome	Chr2
GTF2H5	3542.21	-0.233563	0.0576718	16.4276	5.05e-05	0.0101427	NW_005081632.1	316356	321195	+	3	Genome	Chr2
HAO1	162.941	0.413847	0.116114	12.6369	0.00037821	0.0437597	NW_005081577.1	4637903	4663658	-	3	Genome	Chr2
HDHD5	1095.26	-0.176495	0.0445868	15.6824	7.49e-05	0.0134935	NW_005081546.1	2389957	2397647	+	1A	Genome	Genome
HINT3	1534.6	-0.249802	0.0643498	15.0947	0.00010225	0.0175289	NW_005081591.1	2124662	2131554	-	3	Genome	Chr2
IARS2	2462.41	0.263551	0.0611302	18.5139	1.69e-05	0.00452841	NW_005081548.1	461922	487724	-	3	Genome	Chr2
ISM1	38.8906	-1.865	0.461711	15.8317	6.92e-05	0.0126296	NW_005081602.1	3048194	3090087	-	3	Genome	Chr2
IYD	21.4164	3.09231	0.64545	20.1924	7e-06	0.00226465	NW_005081596.1	1198166	1216693	+	3	Genome	Chr2
KCNK5	464.497	-0.699831	0.156031	20.1004	7.35e-06	0.00232346	NW_005081548.1	11381424	11416202	+	3	Genome	Chr2
KLHL32	460.526	-0.350892	0.0940939	13.9355	0.00018919	0.0286383	NW_005081553.1	7441249	7562907	+	3	Genome	Chr2
LHPP	1393.64	-0.332469	0.0916492	13.18	0.00028295	0.0379816	NW_005081646.1	40092	109365	+	6	Genome	Genome
LOC102060438	363.226	-0.590554	0.125557	22.1577	2.51e-06	0.0009163	NW_005081574.1	3737471	3748682	+	3	Genome	Chr2
LOC102061123	138.837	0.515202	0.129077	15.8331	6.92e-05	0.0126296	NW_005082404.1	5065	5992	-	25	Genome	Genome
LOC102063741	188.211	1.78721	0.431637	15.8945	6.7e-05	0.0125391	NW_005081766.1	447280	456669	-	27	Genome	Genome
LOC102065273	1392.96	-0.302938	0.0832262	13.2727	0.00026929	0.0364931	NW_005081577.1	1893007	1897379	+	3	Genome	Chr2
LOC102065341	98.4723	-0.857503	0.201509	18.1272	2.07e-05	0.00525018	NA	NA	NA	NA	NA	NA	NA
LOC102066523	170.625	0.824707	0.189199	18.6531	1.57e-05	0.00437439	NA	NA	NA	NA	NA	NA	NA
LOC102066658	104.223	-1.34333	0.316751	17.67	2.63e-05	0.00644585	NW_005081574.1	22895	48720	-	3	Genome	Chr2
LOC102067096	1511.61	0.281256	0.0675042	17.2872	3.21e-05	0.00737487	NW_005081742.1	347780	353803	+	3	Genome	Chr2
LOC102069767	15.948	3.41266	0.601884	29.3582	6.02e-08	2.76e-05	NA	NA	NA	NA	NA	NA	NA
LOC102073345	2.60325	3.74532	0.998185	14.1456	0.00016919	0.0267495	NW_005081545.1	9280759	9290226	+	1	Chr3	Genome
LOC102073467	3.22035	5.0895	1.33927	13.424	0.00024843	0.0346554	NA	NA	NA	NA	NA	NA	NA
LOC102073706	899.405	-0.30873	0.0868587	12.6507	0.00037542	0.0437597	NA	NA	NA	NA	NA	NA	NA
LOC102074043	53.2613	-0.708652	0.198492	12.7456	0.00035684	0.0433367	NW_005081561.1	2833434	2845929	+	3	Genome	Chr2
LOC102074112	274.243	-0.599583	0.1613	13.8249	0.00020066	0.0297412	NW_005081642.1	439799	444037	-	3	Genome	Chr2
LOC102074665	2158.57	-0.404776	0.0752735	28.9695	7.35e-08	3.27e-05	NW_005081620.1	2304231	2306462	+	3	Genome	Chr2
LOC102075198	2259.24	-0.204124	0.0429742	22.598	2e-06	0.00076794	NW_005081699.1	1154774	1172650	+	3	Genome	Chr2
LOC106629307	18.2392	2.81267	0.375501	56.7791	4.88e-14	4.34e-11	NA	NA	NA	NA	NA	NA	NA
LOC106629369	85.2706	2.1916	0.253983	69.3974	8.05e-17	1.04e-13	NA	NA	NA	NA	NA	NA	NA
LOC113458860	13.785	5.09484	0.707213	62.0547	3.34e-15	3.4e-12	NA	NA	NA	NA	NA	NA	NA
LOC113458864	33.5265	7.50896	0.756289	165.092	8.74e-38	1.24e-33	NA	NA	NA	NA	NA	NA	NA
LOC113458865	86.3339	0.87449	0.24558	12.4357	0.00042122	0.0472521	NA	NA	NA	NA	NA	NA	NA
LOC113459042	48.9807	-0.903551	0.247106	13.3853	0.0002536	0.0350337	NA	NA	NA	NA	NA	NA	NA
LOC113459185	17.7191	2.24017	0.598151	12.9668	0.00031706	0.0402808	NW_005081537.1	8320232	8508399	+	5	Genome	Genome
LOC113459251	90.2647	1.15525	0.290924	15.2612	9.36e-05	0.0163657	NA	NA	NA	NA	NA	NA	NA
LOC113459313	5.04132	4.7262	0.859954	34.5577	4.14e-09	2.26e-06	NA	NA	NA	NA	NA	NA	NA
LOC113459375	58.2037	-0.643058	0.154673	17.316	3.17e-05	0.00737487	NA	NA	NA	NA	NA	NA	NA
LOC113459407	34.3024	-1.03156	0.249474	17.0791	3.59e-05	0.00797151	NA	NA	NA	NA	NA	NA	NA
LOC113459466	28.2242	5.94406	0.662309	92.7413	5.96e-22	1.7e-18	NA	NA	NA	NA	NA	NA	NA
LOC113459574	49.5683	1.96646	0.231234	70.2358	5.26e-17	7.49e-14	NA	NA	NA	NA	NA	NA	NA
LOC113459726	71.5973	-0.82382	0.180392	20.9134	4.81e-06	0.00162797	NA	NA	NA	NA	NA	NA	NA
LOC113459787	131.35	-0.749862	0.196242	14.5756	0.00013465	0.0217715	NA	NA	NA	NA	NA	NA	NA
LOC113460666	113.014	0.533509	0.15038	12.5008	0.00040678	0.0463049	NA	NA	NA	NA	NA	NA	NA
LOC113460771	283.508	-1.1241	0.314119	12.6634	0.00037288	0.0437597	NW_005084012.1	815	2603	-	3	Genome	Chr2
LOXL4	114.772	0.769849	0.186153	16.887	3.97e-05	0.00855303	NW_005081541.1	6394753	6409232	-	6	Genome	Genome
LRRC75A	307.999	-0.612374	0.174278	12.3471	0.00044167	0.0487167	NW_005081732.1	17048	76073	+	19	Genome	Genome
LTV1	1278.33	0.273164	0.0725655	14.1167	0.00017181	0.0268644	NW_005081632.1	775138	785102	-	3	Genome	Chr2
LYPLAL1	250.497	-0.343733	0.0955361	12.9733	0.00031597	0.0402808	NW_005081548.1	812666	838641	-	3	Genome	Chr2
MAP3K21	775.575	-0.419424	0.097663	18.4623	1.73e-05	0.00456631	NW_005081589.1	3650445	3691409	-	3	Genome	Chr2
MED23	2696.98	-0.208209	0.045967	20.5433	5.83e-06	0.00192915	NW_005081729.1	346650	384400	-	3	Genome	Chr2
MGME1	186.408	-0.360324	0.0981092	13.4946	0.00023925	0.0337056	NW_005081602.1	3903835	3911455	+	3	Genome	Chr2
MOV10L1	38.3955	-1.5684	0.43168	12.9248	0.00032426	0.0408307	NW_005081543.1	8442809	8473763	+	1A	Genome	Genome
MRPL33	799.4	0.316691	0.0771642	16.7816	4.19e-05	0.0089066	NW_005081548.1	9725306	9731002	-	3	Genome	Chr2
MRPS18A	1307.04	0.226287	0.0589617	14.69	0.00012671	0.0212119	NW_005081620.1	1237874	1260176	+	3	Genome	Chr2
MSH2	519.614	0.528308	0.0758815	48.1228	4e-12	3.16e-09	NW_005081662.1	70957	119370	+	3	Genome	Chr2
MSH5	7.45679	3.023	0.747454	15.4946	8.27e-05	0.0147169	NW_005081729.1	202339	205323	-	3	Genome	Chr2
NDUFAF5	1426.03	0.24028	0.066978	12.8297	0.00034116	0.0421897	NW_005081602.1	2892229	2900418	-	3	Genome	Chr2
NTPCR	966.439	-0.741311	0.0587251	159.44	1.5e-36	1.07e-32	NW_005081589.1	3852325	3866096	-	3	Genome	Chr2
NUS1	1696.65	0.183263	0.0421373	18.8755	1.4e-05	0.00412131	NW_005081697.1	10636	20458	+	3	Genome	Chr2
OLIG3	6.47038	5.09461	0.812149	49.1059	2.43e-12	2.03e-09	NW_005081611.1	2841670	2843721	-	3	Genome	Chr2
POLR1B	603.207	-0.403469	0.0613846	43.2404	4.84e-11	3.44e-08	NW_005081577.1	255139	266783	-	3	Genome	Chr2
PPIL4	866.183	-0.170715	0.0462062	13.6768	0.00021712	0.0318492	NW_005081589.1	347047	368961	-	3	Genome	Chr2
PRELID3B	1544.53	0.777817	0.205848	13.9832	0.00018445	0.0282727	NW_005081608.1	1441582	1446845	-	20	Genome	Genome
PREPL	567.657	-0.374077	0.103909	12.9737	0.00031589	0.0402808	NW_005081548.1	7454449	7481033	-	3	Genome	Chr2
RGS9	213.593	-0.713389	0.173407	16.9072	3.93e-05	0.00855303	NW_005081792.1	441856	469273	-	18	Genome	Genome
RPS27A	3318.91	0.332158	0.0745026	19.7627	8.77e-06	0.00265441	NW_005081577.1	1880165	1881392	+	3	Genome	Chr2
RRM2	56.941	1.58488	0.308869	25.1094	5.42e-07	0.0002141	NW_005081582.1	872319	877657	-	3	Genome	Chr2
SEC63	3737.35	0.259602	0.0723335	12.8279	0.00034148	0.0421897	NW_005081561.1	2117938	2172897	+	3	Genome	Chr2
SLC29A1	1506.4	-0.336234	0.0776153	18.8046	1.45e-05	0.00412131	NW_005081620.1	641427	675201	-	3	Genome	Chr2
SLC35B2	1813.2	-0.269312	0.0716241	14.1611	0.00016781	0.0267495	NW_005081620.1	624805	630419	+	3	Genome	Chr2
SLC4A1AP	990.285	-0.153633	0.0401531	14.6524	0.00012927	0.0213884	NW_005081548.1	9881845	9897824	-	3	Genome	Chr2
SLX4IP	249.657	0.410192	0.109959	13.8478	0.00019823	0.02969	NW_005081577.1	5542703	5627154	+	3	Genome	Chr2
SMIM8	310.341	0.976255	0.118226	66.7187	3.13e-16	3.71e-13	NW_005081569.1	3993069	3996668	+	3	Genome	Chr2
SMOC2	577.156	0.574081	0.160006	12.7192	0.00036192	0.0433367	NW_005081844.1	93025	231237	-	3	Genome	Chr2
SMYD3	161.156	0.607534	0.141264	18.3237	1.86e-05	0.00482165	NW_005081620.1	2690069	3073244	-	3	Genome	Chr2
SOBP	2212.67	-0.328461	0.05367	37.5085	9.1e-10	5.63e-07	NW_005081561.1	2286782	2400657	-	3	Genome	Chr2
SOS1	1338.15	-0.212906	0.0460442	21.4131	3.7e-06	0.00128488	NW_005081615.1	98138	131803	+	3	Genome	Chr2
TAF5L	1842.31	-0.532539	0.0520417	104.842	1.32e-24	4.71e-21	NW_005081653.1	530522	546109	-	3	Genome	Chr2
TBCC	729.292	-0.205114	0.0566088	13.1564	0.00028654	0.0381048	NW_005081548.1	4946147	4948769	-	3	Genome	Chr2
TBXT	63.0899	-0.854437	0.191267	19.9376	8e-06	0.00247492	NW_005081574.1	1257637	1265694	+	3	Genome	Chr2
TCTE1	96.6842	2.27522	0.270652	64.8633	8.03e-16	8.79e-13	NW_005081620.1	567499	583297	+	3	Genome	Chr2
TENT5A	1380.49	-0.282605	0.06989	16.3725	5.2e-05	0.0101427	NW_005081569.1	2007751	2014021	-	3	Genome	Chr2
TMEM18	604.973	-0.390195	0.0668793	34.1157	5.19e-09	2.74e-06	NW_005081609.1	410462	413193	+	3	Genome	Chr2
TMX4	2088.74	-0.228723	0.0564996	16.4165	5.08e-05	0.0101427	NW_005081577.1	4663759	4675633	-	3	Genome	Chr2
TNFRSF11A	266.16	0.769741	0.216695	12.389	0.00043187	0.0480087	NW_005081542.1	4465806	4493914	+	2	Genome	Genome
TTC13	3122.09	-0.229711	0.0562684	16.6924	4.4e-05	0.0090646	NW_005081653.1	1007814	1044847	-	3	Genome	Chr2
USH2A	348.129	-0.470165	0.116238	16.3884	5.16e-05	0.0101427	NW_005081548.1	2099514	2476250	+	3	Genome	Chr2

## Sheet: Females_Hyp_WvsT
gene_name	baseMean	log2FoldChange	lfcSE	stat	pvalue	padj	CHROM	Start	End	Strand	Zfinch_Chromosome	ZAL3	ZAL2
AARS2	3055.8	-0.348401	0.08936	15.2739	9.29938e-05	0.0230492	NW_005081620.1	536276	552865	+	3	Genome	Chr2
ADI1	3629.13	-0.450014	0.108176	17.3973	3.03256e-05	0.0092087	NW_005081582.1	3781916	3787434	+	3	Genome	Chr2
AGT	111255	-0.385076	0.0769736	25.1557	5.28832e-07	0.000431776	NW_005081653.1	922303	933218	-	3	Genome	Chr2
ALKAL2	1290.45	-0.63006	0.153732	16.8867	3.9678e-05	0.0109932	NW_005081609.1	581075	594005	+	3	Genome	Chr2
APMAP	5192.51	0.713661	0.116854	36.4139	1.59565e-09	3.69128e-06	NW_005081602.1	3550574	3561021	+	3	Genome	Chr2
BPNT1	3154.67	0.315215	0.0731165	18.4446	1.74912e-05	0.00622506	NW_005081548.1	491857	500068	+	3	Genome	Chr2
CCR6	119.507	1.07985	0.242032	19.3433	1.09203e-05	0.00433066	NW_005081574.1	753056	765468	-	3	Genome	Chr2
CD109	2108.52	0.905418	0.17856	24.8687	6.13717e-07	0.000473244	NW_005081654.1	977479	1047341	+	3	Genome	Chr2
CD44	1374.55	-0.658293	0.120933	29.7734	4.85615e-08	5.18488e-05	NW_005081537.1	23745206	23796176	-	5	Genome	Genome
CEBPZ	5692.23	-0.41709	0.0777446	28.9306	7.50193e-08	7.43762e-05	NW_005081699.1	828737	843152	-	3	Genome	Chr2
CENPF	220.862	1.50566	0.225631	42.0251	9.01093e-11	3.12679e-07	NW_005081548.1	2767537	2801628	-	3	Genome	Chr2
CLIC4	5949.42	-0.478078	0.108322	19.5843	9.62594e-06	0.00404873	NW_005081782.1	945854	954941	+	23	Genome	Genome
CLMP	112.703	-1.65317	0.399518	16.8969	3.94668e-05	0.0109932	NW_005082036.1	3794	80418	+	24	Genome	Genome
CMPK2	777.728	-1.5573	0.328434	22.1621	2.50577e-06	0.00139121	NW_005081582.1	2460384	2467571	+	3	Genome	Chr2
COG2	2288.57	-0.416311	0.101906	16.7699	4.21963e-05	0.0112632	NW_005081653.1	891790	922678	+	3	Genome	Chr2
COL21A1	106.188	-1.21788	0.2965	16.8528	4.0393e-05	0.0109932	NW_005081569.1	5214849	5281533	+	3	Genome	Chr2
CUNH10orf88	1220.21	0.577064	0.155644	13.5053	0.000237895	0.0474572	NW_005081788.1	647966	651658	+	6	Genome	Genome
DTL	68.8053	1.38067	0.367472	13.4939	0.000239338	0.0474572	NW_005081548.1	3837600	3861707	-	3	Genome	Chr2
ESR1	4719.63	0.405806	0.106217	14.433	0.000145237	0.0319982	NW_005081596.1	1727842	1914363	+	3	Genome	Chr2
GLO1	10712.2	-0.351962	0.0625925	31.77	1.73549e-08	2.63478e-05	NW_005081548.1	11696849	11704220	+	3	Genome	Chr2
GPR34	277.034	-0.961151	0.248375	15.0075	0.000107086	0.0251924	NW_005081607.1	3848960	3854036	-	1	Chr3	Genome
HHIP	1478.36	0.462246	0.106368	18.6567	1.565e-05	0.00571638	NW_005081563.1	3048264	3115888	-	4	Genome	Genome
HINT3	3940.2	-0.336795	0.0904189	13.9392	0.000188822	0.0397099	NW_005081591.1	2124662	2131554	-	3	Genome	Chr2
IYD	53.0503	1.81542	0.45892	14.5364	0.000137475	0.0312812	NW_005081596.1	1198166	1216693	+	3	Genome	Chr2
LIPG	727.227	1.23737	0.304953	15.6227	7.73208e-05	0.019513	NW_005081629.1	390655	400317	-	Z	Genome	Genome
LMBRD1	6439.31	-0.350909	0.0796384	19.5087	1.0014e-05	0.00408808	NW_005081553.1	693345	760718	+	3	Genome	Chr2
LOC102062622	1152.43	-0.370747	0.0746965	24.7355	6.57619e-07	0.000480408	NW_005081876.1	208051	216485	+	3	Genome	Chr2
LOC102062779	91.6074	1.99818	0.502281	14.3723	0.000149992	0.0325295	NW_005081611.1	3023100	3039444	-	3	Genome	Chr2
LOC102068570	136.635	1.46948	0.295592	23.3852	1.32597e-06	0.000800195	NW_005081615.1	3556	5915	-	3	Genome	Chr2
LOC102069515	8420.85	0.738032	0.15644	21.6921	3.201e-06	0.00170884	NA	NA	NA	NA	NA	NA	NA
LOC102073467	12.3365	2.71791	0.726054	13.3529	0.000258017	0.0497399	NA	NA	NA	NA	NA	NA	NA
LOC102073706	2044.01	-0.579592	0.139355	17.3952	3.03591e-05	0.0092087	NA	NA	NA	NA	NA	NA	NA
LOC102074112	1077.7	-0.93649	0.164197	32.6184	1.1215e-08	1.9458e-05	NW_005081642.1	439799	444037	-	3	Genome	Chr2
LOC106629396	90.7533	2.50372	0.450297	27.3329	1.71269e-07	0.000148576	NA	NA	NA	NA	NA	NA	NA
LOC106630015	129.679	-0.715892	0.173936	17.0463	3.64798e-05	0.0105487	NW_005081912.1	431163	432029	-	28	Genome	Genome
LOC113458759	37.0392	1.93415	0.420293	20.0656	7.48316e-06	0.0035816	NA	NA	NA	NA	NA	NA	NA
LOC113458864	81.9834	4.10612	0.791209	20.6695	5.4579e-06	0.00280577	NA	NA	NA	NA	NA	NA	NA
LOC113459042	151.194	-1.32813	0.218996	36.7293	1.35723e-09	3.69128e-06	NA	NA	NA	NA	NA	NA	NA
LOC113459138	79.615	-1.70416	0.301992	31.5959	1.89826e-08	2.63478e-05	NA	NA	NA	NA	NA	NA	NA
LOC113459212	62.9977	-1.91503	0.383254	24.5929	7.08128e-07	0.000491441	NA	NA	NA	NA	NA	NA	NA
LOC113459313	23.1221	2.87271	0.656905	17.3444	3.11822e-05	0.0092087	NA	NA	NA	NA	NA	NA	NA
LOC113459444	139.536	1.71885	0.281214	34.9863	3.32036e-09	6.5838e-06	NW_005081599.1	2064557	2065688	-	Z	Genome	Genome
LOC113459574	114.674	1.43716	0.289591	23.4549	1.27874e-06	0.000800195	NA	NA	NA	NA	NA	NA	NA
LOC113459616	134.156	-1.0238	0.27756	13.6492	0.000220331	0.0449734	NA	NA	NA	NA	NA	NA	NA
LOC113459726	159.11	-0.902898	0.227092	15.8772	6.75896e-05	0.0177008	NA	NA	NA	NA	NA	NA	NA
LOC113459787	1046.94	-1.00792	0.232256	18.8535	1.41151e-05	0.00544214	NA	NA	NA	NA	NA	NA	NA
LOC113459925	170.609	-1.74209	0.35687	23.4222	1.3007e-06	0.000800195	NW_005081684.1	4324	47560	+	8	Genome	Genome
LOC113460743	145.423	1.76686	0.463831	13.3662	0.0002562	0.0497399	NA	NA	NA	NA	NA	NA	NA
LTBP1	999.847	-0.446594	0.112796	15.7589	7.19481e-05	0.0184933	NW_005081574.1	4046046	4231553	-	3	Genome	Chr2
MSH2	1591.57	0.269613	0.0640028	17.6526	2.65159e-05	0.00876286	NW_005081662.1	70957	119370	+	3	Genome	Chr2
MUL1	4847.78	-2.16621	0.573167	13.6717	0.000217716	0.0449734	NW_005081866.1	475266	478653	-	21	Genome	Genome
NADK2	2975.12	-1.03702	0.233739	19.6934	9.09137e-06	0.00394338	NW_005081604.1	1846528	1878726	-	Z	Genome	Genome
NID1	2853.61	-0.39753	0.0936923	18.0939	2.1027e-05	0.00729636	NW_005081589.1	2627523	2670714	+	3	Genome	Chr2
NTPCR	3082.85	-0.892683	0.0940839	90.3146	2.03145e-21	2.81965e-17	NW_005081589.1	3852325	3866096	-	3	Genome	Chr2
PBX1	4141.21	0.556465	0.142003	15.0929	0.000102348	0.0244929	NW_005081682.1	525718	654645	+	8	Genome	Genome
PLB1	810.704	-0.401147	0.105604	14.4994	0.000140204	0.0313877	NW_005081548.1	9331888	9426676	-	3	Genome	Chr2
POLR1B	1529.9	-0.428059	0.103032	17.3514	3.10668e-05	0.0092087	NW_005081577.1	255139	266783	-	3	Genome	Chr2
PPIL4	2891.38	-0.3429	0.0758384	20.5335	5.85978e-06	0.00290478	NW_005081589.1	347047	368961	-	3	Genome	Chr2
RASGRP3	911.34	-0.686525	0.163556	17.7047	2.57992e-05	0.00873397	NW_005081574.1	3972496	4032312	-	3	Genome	Chr2
RGS7	5692.07	-0.402896	0.0934712	18.6749	1.5501e-05	0.00571638	NW_005081589.1	626829	862414	+	3	Genome	Chr2
RNASEH1	1879.28	-0.380074	0.0804753	22.4075	2.20506e-06	0.00127526	NW_005081582.1	3773052	3780144	+	3	Genome	Chr2
S1PR3	1229.16	-1.00453	0.240826	17.4238	2.99064e-05	0.0092087	NW_005081571.1	803435	812575	+	Z	Genome	Genome
SCEL	69.0539	1.09021	0.279403	14.8503	0.000116388	0.0269245	NW_005081587.1	3113488	3182521	+	1	Chr3	Genome
SLC10A1	3160.57	-0.634418	0.143231	19.7228	8.95283e-06	0.00394338	NW_005081537.1	14098298	14105504	-	5	Genome	Genome
SLC30A6	1280.01	-0.269887	0.0720289	14.0853	0.000174708	0.0373068	NW_005081699.1	918237	933535	-	3	Genome	Chr2
SMIM8	931.028	0.823559	0.145459	31.2115	2.3139e-08	2.91972e-05	NW_005081569.1	3993069	3996668	+	3	Genome	Chr2
SNCG	6973.96	0.874569	0.193698	19.7315	8.91203e-06	0.00394338	NW_005081541.1	18786707	18802830	-	6	Genome	Genome
TAF5L	4048.48	-0.449592	0.0610764	54.4573	1.58862e-13	1.1025e-09	NW_005081653.1	530522	546109	-	3	Genome	Chr2
TAGLN	428.837	0.471522	0.120641	15.1389	9.98856e-05	0.024323	NW_005081833.1	470146	471960	-	24	Genome	Genome
TCTE1	382.895	2.14139	0.288354	49.4141	2.07248e-12	9.58868e-09	NW_005081620.1	567499	583297	+	3	Genome	Chr2
TMEM18	1137.15	-0.393713	0.0749141	27.7439	1.38487e-07	0.000128147	NW_005081609.1	410462	413193	+	3	Genome	Chr2
TPBG	5297.42	0.707381	0.127246	30.1761	3.94551e-08	4.56364e-05	NW_005081569.1	2243461	2250786	+	3	Genome	Chr2

## Sheet: Females_AMV_WvsT
gene_name	baseMean	log2FoldChange	lfcSE	stat	pvalue	padj	CHROM	Start	End	Strand	Zfinch_Chromosome	ZAL3	ZAL2
AARS2	3460.28	-0.507417	0.0968594	27.5947	1.49592e-07	9.76193e-05	NW_005081620.1	536276	552865	+	3	Genome	Chr2
ABCB10	717.23	-0.447852	0.115624	15.0813	0.000102981	0.0181648	NW_005081653.1	498650	521597	-	3	Genome	Chr2
ADAMTS3	918.043	-0.632665	0.179308	12.5127	0.000404192	0.0446697	NW_005081808.1	554176	613993	+	4	Genome	Genome
ADI1	3908.77	-0.622292	0.115536	29.17	6.6298e-08	4.78183e-05	NW_005081582.1	3781916	3787434	+	3	Genome	Chr2
ALKAL2	1269.13	-0.594765	0.125764	22.4901	2.11225e-06	0.000904572	NW_005081609.1	581075	594005	+	3	Genome	Chr2
APMAP	2051.47	0.678466	0.147481	20.6984	5.3762e-06	0.00188911	NW_005081602.1	3550574	3561021	+	3	Genome	Chr2
ATP6V1C2	155.678	-0.799387	0.202439	15.6531	7.60892e-05	0.0151692	NW_005081582.1	431766	454886	-	3	Genome	Chr2
BDH1	14891	0.853983	0.179024	22.0462	2.66166e-06	0.00110531	NW_005081616.1	630092	642441	+	9	Genome	Genome
BLOC1S4	1143.45	-0.777755	0.176301	19.5422	9.84003e-06	0.00313599	NW_005081547.1	5175663	5182675	+	2	Genome	Genome
BTBD19	444.535	-0.536062	0.144775	13.7751	0.000206048	0.0291101	NW_005081544.1	9729600	9737069	+	8	Genome	Genome
CAPN2	405.391	-0.658092	0.154247	18.2947	1.89237e-05	0.00540272	NW_005081602.1	1762981	1787039	-	3	Genome	Chr2
CARMIL2	8277.78	-0.35576	0.0967085	13.5993	0.000226271	0.0304002	NW_005081644.1	95039	116561	+	11	Genome	Genome
CCDC167	544.77	0.473244	0.11142	17.859	2.37886e-05	0.0062692	NW_005081620.1	480360	493512	+	3	Genome	Chr2
CCR6	93.7873	1.21499	0.213339	31.6957	1.80317e-08	1.76505e-05	NW_005081574.1	753056	765468	-	3	Genome	Chr2
CD109	1634.61	1.75107	0.261665	40.9813	1.53697e-10	3.00894e-07	NW_005081654.1	977479	1047341	+	3	Genome	Chr2
CDH2	10360.8	0.450558	0.120213	13.8633	0.000196601	0.0283602	NW_005081536.1	1360735	1476892	-	2	Genome	Genome
CEBPZ	5671.2	-0.503175	0.0672998	56.1981	6.55256e-14	1.79593e-10	NW_005081699.1	828737	843152	-	3	Genome	Chr2
CENPF	470.373	1.51322	0.125965	137.7	8.47645e-32	1.16161e-27	NW_005081548.1	2767537	2801628	-	3	Genome	Chr2
CEP57L1	71.0224	1.9533	0.363001	26.9871	2.04817e-07	0.000122035	NW_005081561.1	1561326	1585093	-	3	Genome	Chr2
CNKSR3	1127.59	-0.709711	0.137185	26.8947	2.14846e-07	0.000122677	NW_005081596.1	2933689	2988450	-	3	Genome	Chr2
CNST	3812.53	0.45026	0.115219	15.0738	0.00010339	0.0181648	NW_005081620.1	3091761	3144565	+	3	Genome	Chr2
CNTN5	4914.65	0.545865	0.154352	12.2969	0.000453706	0.049346	NW_005081545.1	15053401	15658543	-	1	Chr3	Genome
COL12A1	1530.09	0.923228	0.166467	29.734	4.9558e-08	3.99496e-05	NW_005081654.1	1505224	1605015	-	3	Genome	Chr2
DMP1	73.3724	-1.09074	0.287691	14.4117	0.000146888	0.0228744	NW_005081565.1	6230266	6254283	-	4	Genome	Genome
EFNB1	5051.14	0.300335	0.0807328	13.7325	0.000210776	0.0293762	NW_005081598.1	2177916	2223683	-	4A	Genome	Genome
EIPR1	4112.85	-0.402695	0.0961493	17.6298	2.68351e-05	0.00693864	NW_005081582.1	3847478	3921229	+	3	Genome	Chr2
FAM49A	26311	-0.395969	0.11173	12.6249	0.000380648	0.0427574	NW_005081621.1	783325	823427	+	3	Genome	Chr2
FILIP1L	26239.2	-0.481557	0.133451	13.0929	0.000296418	0.0362689	NW_005081581.1	489117	589835	-	1	Chr3	Genome
FNDC1	360.8	1.91655	0.299799	37.1735	1.08071e-09	1.48101e-06	NW_005081596.1	819771	882154	-	3	Genome	Chr2
FXYD2	652.982	-1.14681	0.31008	13.6571	0.000219411	0.0297704	NW_005081833.1	290630	292999	+	24	Genome	Genome
GABRR1	24.4005	-3.09332	0.618503	23.9435	9.92063e-07	0.000438556	NW_005081569.1	4706398	4736755	-	3	Genome	Chr2
GLO1	7556.84	-0.281432	0.0551341	26.1649	3.13474e-07	0.000165225	NW_005081548.1	11696849	11704220	+	3	Genome	Chr2
GTF3C1	2806.7	0.280936	0.0739691	14.3315	0.000153282	0.023602	NW_005081678.1	867882	908527	+	14	Genome	Genome
HSF2	3100.93	-0.506036	0.139017	13.3202	0.000262557	0.0333155	NW_005081591.1	3733700	3748748	-	3	Genome	Chr2
IPO8	5219.27	1.2026	0.307667	14.5079	0.000139571	0.022502	NW_005081546.1	8572048	8611341	-	1A	Genome	Genome
KYAT3	1577.42	-0.345221	0.0681124	25.7901	3.8064e-07	0.000186296	NW_005081544.1	4009916	4031909	+	8	Genome	Genome
LOC102060438	691.178	-0.628654	0.136646	21.2851	3.95791e-06	0.00154969	NW_005081574.1	3737471	3748682	+	3	Genome	Chr2
LOC102061823	371.567	-0.784457	0.206092	14.5582	0.000135897	0.0221707	NW_005081543.1	3940999	3998373	+	1A	Genome	Genome
LOC102062254	85.3279	-2.11393	0.558336	13.8198	0.000201207	0.0287223	NA	NA	NA	NA	NA	NA	NA
LOC102063416	1338.38	-0.531597	0.107299	24.663	6.82827e-07	0.000311915	NW_005081577.1	5398826	5404127	+	3	Genome	Chr2
LOC102066872	273.111	-1.15809	0.326329	12.5744	0.000391057	0.0435694	NW_005081766.1	766206	767005	-	27	Genome	Genome
LOC102067096	2995.45	0.377213	0.0992325	14.3052	0.000155436	0.0236678	NW_005081742.1	347780	353803	+	3	Genome	Chr2
LOC102069767	33.0954	2.76432	0.68773	14.2353	0.000161317	0.0239397	NA	NA	NA	NA	NA	NA	NA
LOC102072152	336.745	-2.35683	0.557474	16.9447	3.84854e-05	0.00958917	NW_005081698.1	1104536	1117791	-	21	Genome	Genome
LOC102072446	117.766	1.04759	0.284956	13.1072	0.000294168	0.0362689	NA	NA	NA	NA	NA	NA	NA
LOC102073706	1972.83	-0.636368	0.124166	26.4012	2.7737e-07	0.000152043	NA	NA	NA	NA	NA	NA	NA
LOC102073894	657.564	-0.888317	0.222579	15.9789	6.40538e-05	0.0139332	NA	NA	NA	NA	NA	NA	NA
LOC102073951	11461.3	0.461559	0.126989	13.0307	0.000306424	0.0371614	NW_005081776.1	164500	602533	-	4A	Genome	Genome
LOC102074165	4426.06	-1.11855	0.203076	30.3007	3.69984e-08	3.16892e-05	NW_005081632.1	651095	696794	+	3	Genome	Chr2
LOC102074785	28.1657	-2.42534	0.607992	15.3404	8.97758e-05	0.0165878	NW_005081611.1	2325668	2352388	+	3	Genome	Chr2
LOC106629307	32.5788	2.98496	0.722079	14.7994	0.000119572	0.0197423	NA	NA	NA	NA	NA	NA	NA
LOC106629369	148.456	2.03182	0.420766	21.0988	4.36201e-06	0.00166047	NA	NA	NA	NA	NA	NA	NA
LOC106629513	418.596	1.77516	0.447021	14.4212	0.000146151	0.0228744	NA	NA	NA	NA	NA	NA	NA
LOC106629973	2243.45	-1.24418	0.3013	16.9781	3.78132e-05	0.00958917	NW_005081876.1	251954	254395	-	3	Genome	Chr2
LOC106630388	181.29	-1.91882	0.483956	15.2873	9.23332e-05	0.0166491	NW_005082626.1	7444	11094	-	22	Genome	Genome
LOC106630545	9.2286	6.44887	1.47766	15.8878	6.72107e-05	0.0143915	NA	NA	NA	NA	NA	NA	NA
LOC113458746	368.304	-1.03015	0.23725	18.871	1.39866e-05	0.00416834	NA	NA	NA	NA	NA	NA	NA
LOC113458864	79.0838	5.04633	0.740905	35.409	2.67255e-09	2.81728e-06	NA	NA	NA	NA	NA	NA	NA
LOC113459042	95.1404	-0.949253	0.247116	14.8164	0.000118502	0.0197423	NA	NA	NA	NA	NA	NA	NA
LOC113459138	67.1976	-1.27035	0.314545	16.3617	5.23321e-05	0.0117567	NA	NA	NA	NA	NA	NA	NA
LOC113459144	64.9459	1.6428	0.432458	13.5261	0.000235269	0.0313021	NA	NA	NA	NA	NA	NA	NA
LOC113459313	7.6728	6.17896	1.56757	12.9655	0.000317285	0.0381409	NA	NA	NA	NA	NA	NA	NA
LOC113459389	11.9645	6.8282	1.70376	12.3307	0.000445564	0.0488481	NW_005081593.1	536895	562665	+	7	Genome	Genome
LOC113459462	40.0999	1.39725	0.376774	13.2592	0.00027124	0.0341016	NA	NA	NA	NA	NA	NA	NA
LOC113459466	41.7433	8.62733	0.995044	119.869	6.75814e-28	4.63068e-24	NA	NA	NA	NA	NA	NA	NA
LOC113459521	1017.47	-0.28172	0.0710803	15.7594	7.19304e-05	0.0147124	NA	NA	NA	NA	NA	NA	NA
LOC113459574	109.567	1.66438	0.267609	36.6084	1.44408e-09	1.79906e-06	NA	NA	NA	NA	NA	NA	NA
LOC113459726	182.466	-1.00978	0.275264	13.4807	0.000241034	0.0316989	NA	NA	NA	NA	NA	NA	NA
LOC113459787	398.908	-0.768913	0.181856	17.9447	2.27422e-05	0.00611095	NA	NA	NA	NA	NA	NA	NA
LOC113459925	203.095	-1.458	0.381081	14.4845	0.000141315	0.0225183	NW_005081684.1	4324	47560	+	8	Genome	Genome
LOC113460301	521.886	1.24848	0.296299	16.8554	4.0339e-05	0.00969835	NA	NA	NA	NA	NA	NA	NA
LOC113460743	136.822	1.90019	0.428877	17.9563	2.26031e-05	0.00611095	NA	NA	NA	NA	NA	NA	NA
MAEL	132.914	-1.70613	0.472365	12.7915	0.000348192	0.0407276	NW_005081650.1	457918	469697	-	1	Chr3	Genome
METTL24	526.444	-1.00058	0.270881	13.6608	0.000218981	0.0297704	NW_005081561.1	1094442	1141027	+	3	Genome	Chr2
MGME1	430.167	-0.443955	0.111113	16.0347	6.21922e-05	0.0137465	NW_005081602.1	3903835	3911455	+	3	Genome	Chr2
MICALCL	110.463	-1.14335	0.29214	15.3193	9.07827e-05	0.0165878	NW_005081676.1	290106	313321	+	5	Genome	Genome
MLPH	2190.78	-0.954126	0.209591	20.7668	5.18741e-06	0.00187074	NW_005081578.1	127586	156101	+	7	Genome	Genome
MND1	222.221	-1.15055	0.319853	12.9122	0.000326454	0.0389019	NW_005081572.1	4733137	4773487	-	4	Genome	Genome
MPC1	10686.6	-0.22382	0.0548537	16.7081	4.35947e-05	0.0101258	NW_005081574.1	1143347	1154316	+	3	Genome	Chr2
MSH2	1168.03	0.640855	0.11698	29.4546	5.72427e-08	4.35807e-05	NW_005081662.1	70957	119370	+	3	Genome	Chr2
MSH5	14.9335	3.15785	0.811913	13.7197	0.000212218	0.0293762	NW_005081729.1	202339	205323	-	3	Genome	Chr2
MTERF3	1128.12	-0.507958	0.118179	18.5655	1.64167e-05	0.00478669	NW_005081536.1	24522212	24538394	+	2	Genome	Genome
NAPRT	1451.52	-0.471515	0.125257	14.2489	0.000160151	0.0239397	NW_005081536.1	45191851	45199734	-	2	Genome	Genome
NAV1	5711.21	0.5814	0.146275	15.5095	8.20898e-05	0.0157703	NW_005081690.1	934289	995953	-	26	Genome	Genome
NDP	1292.83	-0.509045	0.132583	14.8189	0.000118341	0.0197423	NW_005081607.1	3173372	3193600	+	1	Chr3	Genome
NENF	2847.3	-0.320421	0.0641768	25.0335	5.63437e-07	0.000266253	NW_005081548.1	3728264	3732969	-	3	Genome	Chr2
NTPCR	2134.01	-0.818596	0.106028	59.8301	1.03407e-14	3.54273e-11	NW_005081589.1	3852325	3866096	-	3	Genome	Chr2
OLIG3	25.4583	4.45915	0.800116	27.9512	1.24417e-07	8.52503e-05	NW_005081611.1	2841670	2843721	-	3	Genome	Chr2
PGM3	2499.43	-0.887314	0.216934	16.781	4.19516e-05	0.00991214	NW_005081569.1	2549964	2558228	-	3	Genome	Chr2
PHLDA3	5.71189	5.76196	1.2641	19.8317	8.45673e-06	0.00282661	NW_005081690.1	720994	722299	-	26	Genome	Genome
PIGM	461.073	-0.513763	0.112292	21.0416	4.49416e-06	0.00166454	NW_005081589.1	598078	600448	-	3	Genome	Chr2
PLB1	707.631	-0.876468	0.223026	15.492	8.28563e-05	0.0157703	NW_005081548.1	9331888	9426676	-	3	Genome	Chr2
PLN	105.012	2.15934	0.528871	14.9076	0.000112906	0.0193407	NW_005081697.1	388770	405213	+	3	Genome	Chr2
PSEN2	5642.42	-0.737915	0.186074	15.7995	7.04198e-05	0.0147124	NW_005081602.1	769335	786951	-	3	Genome	Chr2
QPCT	954.759	-0.644923	0.105728	37.415	9.54872e-10	1.45395e-06	NW_005081699.1	894878	913202	+	3	Genome	Chr2
REL	277.076	-0.733985	0.178932	16.8899	3.96114e-05	0.00969347	NW_005081577.1	3683147	3706950	+	3	Genome	Chr2
RIPPLY2	2270.8	-0.44531	0.100593	19.7015	9.05301e-06	0.00295387	NW_005081569.1	2883891	2891403	+	3	Genome	Chr2
RNASEH1	1747.92	-0.326286	0.0914656	12.7782	0.00035069	0.0407276	NW_005081582.1	3773052	3780144	+	3	Genome	Chr2
RNF144A	7972.59	0.570121	0.0939766	36.1577	1.8198e-09	2.07821e-06	NW_005081582.1	2381842	2444090	-	3	Genome	Chr2
RPS6KA2	2101.77	-0.680685	0.152106	20.1257	7.25162e-06	0.00248441	NW_005081574.1	851664	1130471	+	3	Genome	Chr2
RRAD	1187.52	0.634727	0.123139	26.0877	3.26253e-07	0.000165591	NW_005081837.1	357605	360875	-	11	Genome	Genome
RRM2B	2211.67	0.98457	0.208233	21.524	3.49435e-06	0.00140843	NW_005081536.1	22175968	22197644	+	2	Genome	Genome
RRP36	10638.9	-0.311902	0.0791361	15.605	7.80488e-05	0.0152797	NW_005081577.1	64393	71382	-	3	Genome	Chr2
SERAC1	3044.1	0.34676	0.0916624	14.1847	0.000165712	0.0241587	NW_005081632.1	291472	316304	-	3	Genome	Chr2
SERTAD4	525.291	-0.729865	0.130839	31.2423	2.27747e-08	2.08069e-05	NW_005081548.1	4573031	4579016	-	3	Genome	Chr2
SGK1	4048.96	-0.372967	0.0713967	27.4179	1.63911e-07	0.000102102	NW_005081746.1	145372	215279	+	3	Genome	Chr2
SH3BGRL2	20636.2	-0.4525	0.123751	13.443	0.000245924	0.0317938	NW_005081569.1	1105267	1143760	+	3	Genome	Chr2
SLC35D3	5513.14	0.358717	0.0838483	18.128	2.06539e-05	0.00577635	NW_005081611.1	2615938	2621108	+	3	Genome	Chr2
SLC3A1	1395.82	-0.804227	0.226433	12.6657	0.000372429	0.0421799	NW_005081548.1	7442257	7463043	+	3	Genome	Chr2
SMIM8	544.906	0.881337	0.224643	14.9253	0.000111855	0.0193407	NW_005081569.1	3993069	3996668	+	3	Genome	Chr2
SMOC2	919.373	0.490667	0.112269	18.8702	1.39918e-05	0.00416834	NW_005081844.1	93025	231237	-	3	Genome	Chr2
SNTG2	175.175	0.569479	0.154846	13.3855	0.000253576	0.0324767	NW_005081582.1	4787189	4915546	-	3	Genome	Chr2
SPATA17	369.664	-0.661355	0.163339	16.4738	4.9326e-05	0.0112661	NW_005081548.1	1359116	1445990	-	3	Genome	Chr2
TAF5L	4393.6	-0.55132	0.064717	72.9548	1.32651e-17	6.0595e-14	NW_005081653.1	530522	546109	-	3	Genome	Chr2
TBXAS1	924.412	-1.37627	0.373529	13.4664	0.000242877	0.0316989	NW_005081546.1	7698504	7960991	-	1A	Genome	Genome
TCTE1	507.158	2.28034	0.30944	47.9001	4.48497e-12	1.02437e-08	NW_005081620.1	567499	583297	+	3	Genome	Chr2
TMA16	2134.72	-1.22006	0.342193	12.6663	0.000372296	0.0421799	NW_005081572.1	1205120	1230223	-	4	Genome	Genome
TRAF3IP2	309.515	-0.532606	0.149271	12.8023	0.000346193	0.0407276	NW_005081561.1	516055	549080	+	3	Genome	Chr2
TRAPPC12	5168.45	-0.281379	0.0775559	13.2185	0.0002772	0.0345341	NW_005081582.1	3796169	3847459	-	3	Genome	Chr2
TRNAS-AGA	658.863	-0.587078	0.164989	12.732	0.000359449	0.041394	NA	NA	NA	NA	NA	NA	NA
UBALD1	6216.2	-0.42678	0.0969778	19.4703	1.02177e-05	0.00318234	NW_005081678.1	1371304	1379634	+	14	Genome	Genome
UXS1	1953.4	-0.428162	0.109355	15.4099	8.65353e-05	0.0162449	NW_005081594.1	445582	488271	-	1	Chr3	Genome
VDAC1	20103.6	-0.483372	0.0760134	40.6581	1.81336e-10	3.10628e-07	NW_005081551.1	4401038	4416522	-	13	Genome	Genome
VSTM2B	527.478	-0.533233	0.134626	15.7766	7.12771e-05	0.0147124	NW_005081628.1	1809514	1828658	-	11	Genome	Genome
VTA1	3930.55	0.262353	0.0693539	14.222	0.000162463	0.0239397	NW_005081632.1	1512443	1551579	-	3	Genome	Chr2
XPO5	3884.96	0.269406	0.0678888	15.6459	7.63773e-05	0.0151692	NW_005081574.1	3774087	3803477	+	3	Genome	Chr2

## Sheet: Nestling_Males_Hyp_WvsT
gene_name	baseMean	log2FoldChange	lfcSE	stat	pvalue	padj	CHROM	Start	End	Strand	Chromosome	ZAL3	ZAL2
ADI1	3003.18	-0.302451	0.0838335	12.8884	0.00033063	0.075347	NW_005081582.1	3781916	3787434	+	3	Genome	Chr2
AGBL2	130.602	-0.766648	0.197036	14.8108	0.000118853	0.0398208	NW_005082052.1	136461	140400	+	5	Genome	Genome
ALKAL2	997.202	-0.612247	0.126733	22.8022	1.79559e-06	0.00172466	NW_005081609.1	581075	594005	+	3	Genome	Chr2
APLF	510.898	-0.819109	0.176624	20.8236	5.03581e-06	0.00341044	NW_005081615.1	3400348	3421032	+	3	Genome	Chr2
ATP6V1C2	600.15	-0.737236	0.129763	31.3995	2.10033e-08	4.03473e-05	NW_005081582.1	431766	454886	-	3	Genome	Chr2
BEND6	1623.38	-0.594495	0.119235	24.3061	8.21779e-07	0.000971469	NW_005081569.1	4823934	4846725	-	3	Genome	Chr2
CEBPZ	6127.81	-0.428361	0.0587407	52.3917	4.54646e-13	1.74675e-09	NW_005081699.1	828737	843152	-	3	Genome	Chr2
CENPW	541.164	0.847882	0.125301	46.2187	1.05763e-11	3.25072e-08	NW_005081591.1	1964183	1974671	-	3	Genome	Chr2
CEP57L1	105.441	1.21545	0.313558	15.1045	0.00010172	0.0372199	NW_005081561.1	1561326	1585093	-	3	Genome	Chr2
CFAP61	1023.13	-0.714405	0.154293	20.8463	4.97658e-06	0.00341044	NW_005081577.1	671217	753647	+	3	Genome	Chr2
COL21A1	246.338	-1.05756	0.280623	13.5668	0.000230216	0.0586741	NW_005081569.1	5214849	5281533	+	3	Genome	Chr2
CRYBA2	3615.01	-0.515541	0.138203	13.647	0.000220595	0.0574593	NW_005081562.1	6017364	6033770	-	7	Genome	Genome
CUNH1orf131	864.122	0.438565	0.119656	13.5451	0.000232894	0.0586741	NW_005081653.1	1151164	1159898	-	3	Genome	Chr2
DDX43	53.4619	0.909957	0.246073	13.7958	0.000203795	0.0563266	NW_005081654.1	869093	890764	+	3	Genome	Chr2
ECHDC1	783.835	-0.477016	0.133425	12.5778	0.000390353	0.0828296	NW_005081591.1	1551576	1595334	+	3	Genome	Chr2
EFCAB5	1269.5	-0.530485	0.134218	15.319	9.0799e-05	0.0354767	NW_005081728.1	108606	144235	+	19	Genome	Genome
EPHX1	66.9285	-1.13835	0.243008	21.2653	3.99896e-06	0.00323453	NW_005081602.1	1242305	1256155	-	3	Genome	Chr2
EYA4	135.988	-0.990906	0.267669	13.1868	0.000281935	0.0668779	NW_005081746.1	419679	560306	-	3	Genome	Chr2
F8	187.657	-1.26306	0.343278	12.7484	0.000356306	0.0782245	NW_005081557.1	7685328	7709863	+	4A	Genome	Genome
FIG4	3088.09	-0.482774	0.0846753	31.9546	1.57816e-08	3.46475e-05	NW_005081561.1	1317339	1372551	-	3	Genome	Chr2
FRMPD2	557.555	-0.699913	0.176116	15.3653	8.86013e-05	0.0354767	NW_005081541.1	10293797	10359938	+	6	Genome	Genome
HEBP2	1816.99	1.28977	0.304245	18.0526	2.14885e-05	0.0106527	NW_005081580.1	1309307	1314385	+	8	Genome	Genome
LOC102063416	2050.83	-0.484136	0.133752	12.8728	0.000333394	0.075347	NW_005081577.1	5398826	5404127	+	3	Genome	Chr2
LOC102063488	127.103	-1.58271	0.400939	14.359	0.000151052	0.0483618	NW_005081617.1	29647	35938	+	9	Genome	Genome
LOC102065341	318.354	-1.09357	0.282959	14.1961	0.000164707	0.0516576	NA	NA	NA	NA	NA	NA	NA
LOC102065471	32.0479	-2.05722	0.440144	20.1584	7.12847e-06	0.00422472	NW_005081615.1	957388	966410	+	3	Genome	Chr2
LOC102066482	38.3752	-1.85213	0.383691	21.7279	3.14182e-06	0.00268241	NW_005081574.1	173	22268	-	3	Genome	Chr2
LOC102067187	526.75	-0.608577	0.118472	25.8532	3.68397e-07	0.000566152	NA	NA	NA	NA	NA	NA	NA
LOC102068036	354.982	0.711839	0.193347	13.6788	0.00021689	0.0574593	NA	NA	NA	NA	NA	NA	NA
LOC102070911	807.097	-0.656512	0.167924	14.9056	0.000113025	0.0394765	NW_005081718.1	1168676	1198239	+	17	Genome	Genome
LOC106629396	35.6922	1.60369	0.328131	23.9884	9.69165e-07	0.00106387	NA	NA	NA	NA	NA	NA	NA
LOC106629504	1283.73	-0.360805	0.100134	12.8398	0.000339324	0.0755758	NA	NA	NA	NA	NA	NA	NA
LOC106629587	411.421	1.70561	0.377606	20.2681	6.73141e-06	0.00422472	NW_005081646.1	1314875	1336272	+	6	Genome	Genome
LOC106629973	325.884	-0.819822	0.216592	13.8692	0.000195983	0.0563266	NW_005081876.1	251954	254395	-	3	Genome	Chr2
LOC113458864	50.6835	4.81431	0.913792	22.9813	1.63583e-06	0.00167596	NA	NA	NA	NA	NA	NA	NA
LOC113459042	166.839	-1.02422	0.173506	33.6229	6.69001e-09	1.71353e-05	NA	NA	NA	NA	NA	NA	NA
LOC113459046	120.99	-0.685619	0.178566	14.4626	0.000142971	0.0467486	NA	NA	NA	NA	NA	NA	NA
LOC113459138	193.757	-1.06777	0.254736	16.7937	4.16715e-05	0.0188355	NA	NA	NA	NA	NA	NA	NA
LOC113459407	402.435	-1.23946	0.230053	27.3796	1.67187e-07	0.000285481	NA	NA	NA	NA	NA	NA	NA
LOC113459463	218.899	-0.719539	0.184707	14.8054	0.000119193	0.0398208	NA	NA	NA	NA	NA	NA	NA
LOC113459466	10.2922	5.30045	1.0235	25.1667	5.25828e-07	0.000734629	NA	NA	NA	NA	NA	NA	NA
LOC113459543	143.338	-1.92314	0.427427	18.1896	1.99965e-05	0.0102435	NA	NA	NA	NA	NA	NA	NA
LOC113459574	124.193	1.85523	0.238338	60.2613	8.30645e-15	6.38268e-11	NA	NA	NA	NA	NA	NA	NA
LOC113459616	69.468	-1.3401	0.300821	18.8552	1.41024e-05	0.00802686	NA	NA	NA	NA	NA	NA	NA
LOC113459726	121.328	-1.1437	0.225525	24.7049	6.68146e-07	0.000855673	NA	NA	NA	NA	NA	NA	NA
LOC113459787	1231.08	-0.981529	0.229811	17.4426	2.96116e-05	0.0141981	NA	NA	NA	NA	NA	NA	NA
LPAR1	2065	0.54057	0.139279	15.2111	9.61365e-05	0.0360348	NW_005081780.1	82255	149863	+	Z	Genome	Genome
LTV1	2132.72	0.280741	0.0756758	13.8435	0.000198686	0.0563266	NW_005081632.1	775138	785102	-	3	Genome	Chr2
MAP3K5	1251.23	0.354721	0.0899157	15.6745	7.52306e-05	0.0315948	NW_005081611.1	2465623	2563486	-	3	Genome	Chr2
MAPKAPK5	1975.6	0.300717	0.080999	13.8742	0.000195465	0.0563266	NW_005081664.1	2176161	2204661	+	15	Genome	Genome
MRAP2	986.591	-0.609589	0.150199	16.0915	6.03533e-05	0.0265003	NW_005081569.1	2953326	2964960	+	3	Genome	Chr2
MRPS18A	2573.41	0.331133	0.0939501	12.5094	0.000404911	0.082969	NW_005081620.1	1237874	1260176	+	3	Genome	Chr2
MTBP	284.366	-0.54895	0.153651	12.5669	0.000392633	0.0828296	NW_005081536.1	33275115	33308123	+	2	Genome	Genome
MYB	386.048	-0.774551	0.205448	13.793	0.0002041	0.0563266	NW_005081596.1	263410	289364	+	3	Genome	Chr2
NEUROD1	825.93	-0.537808	0.134601	15.6536	7.60677e-05	0.0315948	NW_005081554.1	6632548	6635542	-	7	Genome	Genome
NTPCR	2313.64	-0.742554	0.0977665	56.0061	7.22467e-14	3.70096e-10	NW_005081589.1	3852325	3866096	-	3	Genome	Chr2
PLB1	988.405	-0.731711	0.167591	18.5084	1.6916e-05	0.00928444	NW_005081548.1	9331888	9426676	-	3	Genome	Chr2
PREPL	1386.04	-0.515279	0.14061	13.1806	0.000282865	0.0668779	NW_005081548.1	7454449	7481033	-	3	Genome	Chr2
REL	254.957	-0.659602	0.175984	13.7607	0.000207639	0.0563266	NW_005081577.1	3683147	3706950	+	3	Genome	Chr2
RRBP1	3177.01	0.632497	0.179669	12.5208	0.000402439	0.082969	NW_005081602.1	3826805	3843843	-	3	Genome	Chr2
SAMD3	704.587	-0.494312	0.104845	21.8854	2.8943e-06	0.00261644	NW_005081591.1	200171	243121	+	3	Genome	Chr2
SLC22A4	911.726	-0.652739	0.181816	12.563	0.000393451	0.0828296	NW_005081551.1	3436697	3454627	-	13	Genome	Genome
SLC4A1AP	1854.6	-0.278869	0.075974	13.3545	0.000257809	0.062889	NW_005081548.1	9881845	9897824	-	3	Genome	Chr2
SPATA17	896.511	-0.503729	0.134633	13.7491	0.000208916	0.0563266	NW_005081548.1	1359116	1445990	-	3	Genome	Chr2
STX7	5363.31	0.260082	0.0723394	13.0016	0.000311233	0.07247	NW_005081729.1	791148	815860	-	3	Genome	Chr2
TAF5L	3702.38	-0.565023	0.066694	70.3384	4.99559e-17	7.67723e-13	NW_005081653.1	530522	546109	-	3	Genome	Chr2
TCTE1	357.599	1.08237	0.296985	13.3911	0.000252815	0.0626656	NW_005081620.1	567499	583297	+	3	Genome	Chr2
TDRD9	160.314	2.29576	0.503523	20.1534	7.14749e-06	0.00422472	NW_005081549.1	10031704	10092320	+	5	Genome	Genome
TMEM100	14354.5	0.359377	0.0958928	14.1544	0.0001684	0.0517594	NW_005081638.1	1614238	1618542	+	18	Genome	Genome
TMX4	7656.08	-0.293102	0.0746003	15.2872	9.23392e-05	0.0354767	NW_005081577.1	4663759	4675633	-	3	Genome	Chr2
TPRN	1284.32	0.488072	0.117586	17.3872	3.04879e-05	0.0141981	NW_005081672.1	694728	712606	-	17	Genome	Genome
USH2A	3940.45	-0.584998	0.149712	14.9223	0.000112028	0.0394765	NW_005081548.1	2099514	2476250	+	3	Genome	Chr2
VTA1	3730.67	0.275069	0.0645083	18.2938	1.89324e-05	0.0100329	NW_005081632.1	1512443	1551579	-	3	Genome	Chr2
WDR27	284.968	-1.08968	0.233401	20.7978	5.10412e-06	0.00341044	NW_005081653.1	1648459	1738823	+	3	Genome	Chr2
ZUP1	1796.06	-0.408408	0.0882202	21.1464	4.25508e-06	0.0032696	NW_005081642.1	395447	406175	+	3	Genome	Chr2

## Sheet: Nestling_Males_AMV_WvsT
gene_name	baseMean	log2FoldChange	lfcSE	stat	pvalue	padj	CHROM	Start	End	Strand	Chromosome	ZAL3	ZAL2
ATP6V1C2	206.171	-0.892802	0.208877	17.4835	2.89808e-05	0.0178212	NW_005081582.1	431766	454886	-	3	Genome	Chr2
CAPN11	7203.31	0.831561	0.154513	29.5573	5.42881e-08	0.000103684	NW_005081620.1	702426	715405	-	3	Genome	Chr2
CCK	1600.21	4.58952	0.926522	20.8709	4.91307e-06	0.00469168	NW_005081568.1	63850	70696	+	2	Genome	Genome
CEBPZ	5773.24	-0.436503	0.0748732	33.2969	7.91088e-09	2.41741e-05	NW_005081699.1	828737	843152	-	3	Genome	Chr2
CEP19	1493.63	-2.06025	0.252384	57.525	3.33707e-14	1.69957e-10	NW_005081617.1	2253214	2254927	-	9	Genome	Genome
CEP57L1	45.1427	3.37424	0.764165	18.3926	1.79753e-05	0.015258	NW_005081561.1	1561326	1585093	-	3	Genome	Chr2
FAM83B	73.4984	-1.21457	0.280411	17.7474	2.52268e-05	0.0171252	NW_005081569.1	5665430	5721543	-	3	Genome	Chr2
FIG4	2267.12	-0.608784	0.112094	28.6239	8.78914e-08	0.00014921	NW_005081561.1	1317339	1372551	-	3	Genome	Chr2
IARS2	4778.19	0.403825	0.0856984	22.491	2.1113e-06	0.00230418	NW_005081548.1	461922	487724	-	3	Genome	Chr2
IYD	78.0765	1.77253	0.424216	17.7062	2.57791e-05	0.0171252	NW_005081596.1	1198166	1216693	+	3	Genome	Chr2
KLHL10	5.88718	-5.85349	1.23126	19.1424	1.2132e-05	0.0109038	NW_005081766.1	957949	964850	-	27	Genome	Genome
LOC102066021	15.996	3.11066	0.627073	24.4408	7.66289e-07	0.000975678	NA	NA	NA	NA	NA	NA	NA
LOC102069767	27.177	3.26202	0.811857	15.457	8.4404e-05	0.0496004	NA	NA	NA	NA	NA	NA	NA
LOC113458864	36.7292	7.04458	0.755523	102.377	4.5908e-24	7.01428e-20	NA	NA	NA	NA	NA	NA	NA
LOC113459466	17.4037	7.80929	0.967109	61.0227	5.64212e-15	4.3103e-11	NA	NA	NA	NA	NA	NA	NA
LOC113459543	32.8126	-2.10628	0.472302	17.8456	2.39578e-05	0.0171252	NA	NA	NA	NA	NA	NA	NA
LOC113459574	141.484	1.32046	0.201933	43.6685	3.88987e-11	1.48583e-07	NA	NA	NA	NA	NA	NA	NA
LOC113459787	604.794	-1.22892	0.216556	29.9704	4.38695e-08	9.57545e-05	NA	NA	NA	NA	NA	NA	NA
NTPCR	1294.19	-0.511304	0.101373	24.8573	6.17345e-07	0.000857492	NW_005081589.1	3852325	3866096	-	3	Genome	Chr2
RMND1	2074.1	0.450166	0.0896204	25.5739	4.2576e-07	0.000650519	NW_005081596.1	1645576	1665208	-	3	Genome	Chr2
SCCPDH	10010.9	0.289114	0.0683636	18.0631	2.13701e-05	0.0171252	NW_005081620.1	3170714	3181122	+	3	Genome	Chr2
SLC8A1	28730.5	-0.812796	0.188519	17.7729	2.48901e-05	0.0171252	NW_005081615.1	337645	452272	-	3	Genome	Chr2
SPTLC3	139.182	-0.648289	0.153416	17.4718	2.91597e-05	0.0178212	NW_005081602.1	3115394	3349539	-	3	Genome	Chr2
TAF5L	3332.08	-0.472265	0.0824367	32.1065	1.45949e-08	3.71659e-05	NW_005081653.1	530522	546109	-	3	Genome	Chr2
TCTE1	398.214	2.01208	0.424602	22.5397	2.05845e-06	0.00230418	NW_005081620.1	567499	583297	+	3	Genome	Chr2
TMEM40	791.965	4.01738	0.820347	21.3563	3.81359e-06	0.00388452	NW_005081564.1	4132274	4151199	-	12	Genome	Genome

## Sheet: Nestling_Females_Hyp_WvsT
gene_name	baseMean	log2FoldChange	lfcSE	stat	pvalue	padj	CHROM	Start	End	Strand	Chromosome	ZAL3	ZAL2
ADI1	2657.07	-0.585921	0.105013	30.9305	2.67431e-08	2.69971e-05	NW_005081582.1	3781916	3787434	+	3	Genome	Chr2
ALKAL2	959.306	-0.726849	0.10098	51.362	7.68105e-13	2.71391e-09	NW_005081609.1	581075	594005	+	3	Genome	Chr2
ANGEL2	1542.26	0.320891	0.061457	27.2226	1.81323e-07	0.000144745	NW_005081548.1	3501733	3517130	+	3	Genome	Chr2
ARHGAP32	8071.01	-1.2614	0.276359	20.203	6.96435e-06	0.0028122	NW_005081744.1	594983	779298	-	24	Genome	Genome
BEND6	1353.97	-0.628236	0.138139	20.5257	5.88345e-06	0.00251972	NW_005081569.1	4823934	4846725	-	3	Genome	Chr2
C3AR1	271.427	-2.72125	0.492657	26.9708	2.0655e-07	0.00015364	NW_005081713.1	21885	32051	+	1	Chr3	Genome
CCR6	61.9411	1.30866	0.281373	21.2165	4.10226e-06	0.00207061	NW_005081574.1	753056	765468	-	3	Genome	Chr2
CEBPZ	5643.22	-0.381941	0.0397729	92.0009	8.66355e-22	6.1221e-18	NW_005081699.1	828737	843152	-	3	Genome	Chr2
CEP57L1	109.34	1.52283	0.262041	32.7608	1.04224e-08	1.31055e-05	NW_005081561.1	1561326	1585093	-	3	Genome	Chr2
CMPK2	403.975	-1.08903	0.14564	54.9094	1.26214e-13	5.94594e-10	NW_005081582.1	2460384	2467571	+	3	Genome	Chr2
CNKSR3	661.342	-0.857193	0.20238	17.6913	2.59813e-05	0.00800635	NW_005081596.1	2933689	2988450	-	3	Genome	Chr2
CUNH1orf115	585.288	-0.484904	0.0885821	29.8551	4.65574e-08	4.38664e-05	NW_005081548.1	241754	245951	-	3	Genome	Chr2
DISC1	1126.53	-0.604703	0.131208	21.098	4.36374e-06	0.00212665	NW_005081589.1	4313836	4447333	-	3	Genome	Chr2
ENPP6	1266.1	-1.45044	0.313579	20.5617	5.77385e-06	0.00251972	NW_005081552.1	5095265	5126168	-	4	Genome	Genome
FERMT1	494.121	0.433933	0.0968212	20.0459	7.56041e-06	0.00288787	NW_005081577.1	4064865	4083366	-	3	Genome	Chr2
FIG4	2716.63	-0.451396	0.0881509	26.1266	3.19754e-07	0.000215195	NW_005081561.1	1317339	1372551	-	3	Genome	Chr2
GALNT14	1036.14	0.562207	0.13606	16.9774	3.7828e-05	0.0109107	NW_005081602.1	217501	316180	-	3	Genome	Chr2
GLO1	9073.41	-0.268623	0.0573917	21.8768	2.90733e-06	0.00152183	NW_005081548.1	11696849	11704220	+	3	Genome	Chr2
GPR17	2177.84	-1.39542	0.269533	25.8294	3.72969e-07	0.000239598	NW_005081805.1	433843	441035	+	9	Genome	Genome
GREB1	4997.33	1.47921	0.290503	24.8707	6.13082e-07	0.000361029	NW_005081621.1	3100814	3165186	-	3	Genome	Chr2
LOC102062779	79.2498	1.64724	0.329587	23.9986	9.64039e-07	0.000544991	NW_005081611.1	3023100	3039444	-	3	Genome	Chr2
LOC102068868	1418.45	1.47237	0.34589	17.3895	3.04496e-05	0.00915625	NW_005081554.1	3060071	3061775	+	7	Genome	Genome
LOC102070290	270.55	-2.3336	0.52933	17.6856	2.6059e-05	0.00800635	NW_005081557.1	7520472	7522220	+	4A	Genome	Genome
LOC102074112	812.319	-0.786882	0.173715	20.2788	6.6939e-06	0.0027825	NW_005081642.1	439799	444037	-	3	Genome	Chr2
LOC102075255	145.707	0.706778	0.167413	17.7295	2.54648e-05	0.00800635	NA	NA	NA	NA	NA	NA	NA
LOC106629396	44.9028	1.81702	0.429081	17.1679	3.42168e-05	0.0100747	NA	NA	NA	NA	NA	NA	NA
LOC113458759	44.107	1.96522	0.437681	19.1923	1.18192e-05	0.0043958	NA	NA	NA	NA	NA	NA	NA
LOC113458864	58.7615	5.00722	0.711101	39.0984	4.02979e-10	9.49217e-07	NA	NA	NA	NA	NA	NA	NA
LOC113459042	151.045	-0.942686	0.181413	26.68	2.401e-07	0.000169666	NA	NA	NA	NA	NA	NA	NA
LOC113459313	28.7024	3.10361	0.622535	22.2413	2.40442e-06	0.00130699	NA	NA	NA	NA	NA	NA	NA
LOC113459358	68.3075	1.55635	0.255226	36.306	1.68645e-09	2.97932e-06	NA	NA	NA	NA	NA	NA	NA
LOC113459574	109.87	1.85683	0.259112	49.0229	2.52992e-12	7.15108e-09	NA	NA	NA	NA	NA	NA	NA
MAP3K5	1120.26	0.393553	0.068828	32.6336	1.11276e-08	1.31055e-05	NW_005081611.1	2465623	2563486	-	3	Genome	Chr2
MAS1	3.79501	5.38964	1.02784	27.1906	1.84349e-07	0.000144745	NW_005081596.1	572780	574167	-	3	Genome	Chr2
MSTN	57.6349	-1.16754	0.269644	18.4356	1.75748e-05	0.00591393	NW_005081578.1	5519558	5527922	-	7	Genome	Genome
NTPCR	2020.83	-0.720905	0.0748049	92.081	8.31997e-22	6.1221e-18	NW_005081589.1	3852325	3866096	-	3	Genome	Chr2
PAX6	268.826	-2.29636	0.436435	25.2874	4.93919e-07	0.000303503	NW_005081652.1	331451	345607	-	5	Genome	Genome
PEBP4	2914.55	0.63067	0.14582	18.5637	1.64318e-05	0.00566416	NW_005082022.1	63765	190457	+	22	Genome	Genome
PGM3	2840.07	-0.590271	0.131291	20.0788	7.43149e-06	0.00288787	NW_005081569.1	2549964	2558228	-	3	Genome	Chr2
POLR1B	1452.94	-0.404536	0.0706318	32.7243	1.06199e-08	1.31055e-05	NW_005081577.1	255139	266783	-	3	Genome	Chr2
PPIL4	2536.99	-0.265286	0.0436046	36.9952	1.18418e-09	2.39086e-06	NW_005081589.1	347047	368961	-	3	Genome	Chr2
SERPINE3	59.9141	-1.66263	0.357231	20.8429	4.98526e-06	0.0022728	NW_005081545.1	2136529	2156547	+	1	Chr3	Genome
SLC44A5	5160.2	-1.21211	0.279002	18.3463	1.84176e-05	0.0060534	NW_005081829.1	474186	522718	-	8	Genome	Genome
SMPX	70.1942	-1.23328	0.281398	18.7967	1.45415e-05	0.00513789	NW_005081556.1	2553092	2595143	-	1	Chr3	Genome
TAF5L	3137.86	-0.417043	0.0719	33.5461	6.95964e-09	1.0929e-05	NW_005081653.1	530522	546109	-	3	Genome	Chr2
TCTE1	391.55	1.59858	0.289417	29.1383	6.73915e-08	5.95277e-05	NW_005081620.1	567499	583297	+	3	Genome	Chr2
TFAP2B	142.616	-3.64846	0.58195	32.4273	1.23736e-08	1.3452e-05	NW_005081635.1	1657844	1695757	+	3	Genome	Chr2
TRNAS-AGA	498.374	-0.55117	0.126247	18.9605	1.33451e-05	0.00483607	NA	NA	NA	NA	NA	NA	NA
UTP25	924.52	0.297436	0.065109	20.859	4.94374e-06	0.0022728	NW_005081548.1	4718869	4735175	-	3	Genome	Chr2

## Sheet: Nestling_Females_AMV_WvsT
gene_name	baseMean	log2FoldChange	lfcSE	stat	pvalue	padj	CHROM	Start	End	Strand	Chromosome	ZAL3	ZAL2
AARS2	2837.17	-0.442389	0.0984375	20.2528	6.78533e-06	0.00581942	NW_005081620.1	536276	552865	+	3	Genome	Chr2
CEBPZ	5530.97	-0.394138	0.0821289	23.0964	1.54081e-06	0.00175103	NW_005081699.1	828737	843152	-	3	Genome	Chr2
CEP57L1	59.688	2.96428	0.530441	26.9703	2.06603e-07	0.000334697	NW_005081561.1	1561326	1585093	-	3	Genome	Chr2
CMPK2	211.203	-0.848411	0.218885	15.033	0.00010565	0.046678	NW_005081582.1	2460384	2467571	+	3	Genome	Chr2
EIPR1	5626.87	-0.402604	0.0864134	21.7709	3.07231e-06	0.00308327	NW_005081582.1	3847478	3921229	+	3	Genome	Chr2
EPCAM	421.607	1.13547	0.259933	18.3422	1.84571e-05	0.0128145	NW_005081662.1	58224	65237	+	3	Genome	Chr2
FERMT1	270.302	1.46043	0.210106	45.9013	1.24365e-11	4.53311e-08	NW_005081577.1	4064865	4083366	-	3	Genome	Chr2
FIG4	1932.76	-0.523911	0.134187	15.2872	9.23395e-05	0.0434294	NW_005081561.1	1317339	1372551	-	3	Genome	Chr2
GALM	1142.43	0.555076	0.140247	15.4494	8.47437e-05	0.0412726	NW_005081615.1	198018	212689	-	3	Genome	Chr2
HBS1L	3951.32	-0.307668	0.0717939	18.4117	1.77964e-05	0.0128145	NW_005081596.1	157125	216143	-	3	Genome	Chr2
INSR	15632.6	1.1329	0.20956	28.0355	1.19111e-07	0.000248092	NW_005081908.1	98651	168573	-	28	Genome	Genome
IYD	107.399	2.48098	0.471999	24.3735	7.93545e-07	0.00105181	NW_005081596.1	1198166	1216693	+	3	Genome	Chr2
KCNK5	1132.4	-0.753736	0.179397	17.6638	2.636e-05	0.0174695	NW_005081548.1	11381424	11416202	+	3	Genome	Chr2
LOC102066018	339.879	1.06696	0.2082	25.4208	4.6093e-07	0.000672036	NW_005081602.1	3684267	3691625	+	3	Genome	Chr2
LOC102068321	962.935	0.736133	0.166623	19.1174	1.22919e-05	0.0094324	NA	NA	NA	NA	NA	NA	NA
LOC102069767	50.1201	4.03102	0.788445	20.6392	5.54492e-06	0.00505281	NA	NA	NA	NA	NA	NA	NA
LOC102070035	44.2816	-2.31275	0.539768	17.5217	2.84054e-05	0.0180066	NA	NA	NA	NA	NA	NA	NA
LOC102073952	94.3956	1.65711	0.38609	17.2508	3.27558e-05	0.0191032	NW_005081781.1	804693	805261	-	24	Genome	Genome
LOC106629220	177.749	1.11163	0.277961	15.4454	8.49231e-05	0.0412726	NA	NA	NA	NA	NA	NA	NA
LOC106629307	37.0504	2.35135	0.369708	37.9772	7.15754e-10	2.08714e-06	NA	NA	NA	NA	NA	NA	NA
LOC113458860	61.6559	3.66369	0.744524	19.3799	1.07131e-05	0.00867759	NA	NA	NA	NA	NA	NA	NA
LOC113458864	39.8803	7.87696	0.844703	155.208	1.26117e-35	1.83879e-31	NA	NA	NA	NA	NA	NA	NA
LOC113459466	24.5472	8.00122	0.935009	78.8762	6.61261e-19	3.21373e-15	NA	NA	NA	NA	NA	NA	NA
LOC113459574	141.343	2.03733	0.219516	80.5025	2.90337e-19	2.11656e-15	NA	NA	NA	NA	NA	NA	NA
LPP	511.455	2.17104	0.492581	17.35	3.10899e-05	0.0188871	NW_005081559.1	6803896	7100569	+	9	Genome	Genome
LYZ	60.3616	1.85162	0.438905	16.5449	4.75116e-05	0.02474	NW_005081690.1	1797245	1799707	-	26	Genome	Genome
MSH5	15.0046	2.61726	0.618347	16.5769	4.67177e-05	0.02474	NW_005081729.1	202339	205323	-	3	Genome	Chr2
NTPCR	1176.28	-0.655087	0.159428	16.9186	3.90182e-05	0.0218802	NW_005081589.1	3852325	3866096	-	3	Genome	Chr2
POLR1B	1800.02	-0.494445	0.127237	15.1452	9.95529e-05	0.0453588	NW_005081577.1	255139	266783	-	3	Genome	Chr2
PUS10	916.704	-0.466802	0.100369	21.7095	3.17209e-06	0.00308327	NW_005081577.1	3707052	3731733	-	3	Genome	Chr2
SLC24A5	1030.36	1.41497	0.259337	28.112	1.14494e-07	0.000248092	NW_005081550.1	1416256	1424703	+	10	Genome	Genome
TCTE1	409.1	1.83582	0.333956	27.7731	1.36411e-07	0.00024861	NW_005081620.1	567499	583297	+	3	Genome	Chr2
YPEL5	8655.61	0.313817	0.0651218	23.071	1.56128e-06	0.00175103	NW_005081742.1	301560	313956	-	3	Genome	Chr2

## Sheet: Males_Hyp_2vs2m
gene_name	baseMean	log2FoldChange	lfcSE	stat	pvalue	padj	CHROM	Start	End	Strand	Zfinch_Chromosome	ZAL3	ZAL2
AARS2	282.382	-0.990562	0.0733457	182.404	1.44761e-41	7.25183e-40	NW_005081620.1	536276	552865	+	3	Genome	Chr2
ABCB10	97.9443	-0.505949	0.130481	14.9182	0.000112275	0.000410114	NW_005081653.1	498650	521597	-	3	Genome	Chr2
ABHD12	1477.13	-0.0954941	0.0314041	9.24421	0.00236241	0.00660038	NW_005081577.1	151549	169265	+	3	Genome	Chr2
ACAT2	337.408	-0.252611	0.0633739	15.8742	6.76959e-05	0.000253438	NW_005081596.1	621378	630224	-	3	Genome	Chr2
ACBD3	246.233	0.188676	0.0741731	6.46184	0.0110215	0.0263515	NW_005081602.1	1095404	1113963	+	3	Genome	Chr2
ACP1	942.628	-0.157597	0.0375743	17.5878	2.74342e-05	0.000108093	NW_005081609.1	597191	617179	-	3	Genome	Chr2
ACSS1	20.133	1.46851	0.504687	6.74938	0.00937805	0.0227845	NW_005081577.1	414432	447854	+	3	Genome	Chr2
ACTN2	14.0011	-3.36674	0.536242	36.62	1.4355e-09	9.93519e-09	NW_005081589.1	2380882	2462749	-	3	Genome	Chr2
ACTR2	2316.52	-0.123394	0.0323606	14.5285	0.000138052	0.000497367	NW_005081615.1	1948869	1971862	+	3	Genome	Chr2
ADAT2	109.073	-0.472163	0.132073	12.6463	0.000376315	0.00126886	NW_005081632.1	960691	970183	+	3	Genome	Chr2
ADI1	429.935	-0.988163	0.0819766	143.081	5.64176e-33	2.0466e-31	NW_005081582.1	3781916	3787434	+	3	Genome	Chr2
AGPAT4	325.675	-0.216893	0.0635255	11.6469	0.000643084	0.00202552	NW_005081574.1	3533620	3602502	+	3	Genome	Chr2
AGPAT5	1207.92	-0.183585	0.0381464	23.1424	1.5044e-06	7.19377e-06	NW_005081876.1	117210	171658	+	3	Genome	Chr2
AGT	16190.5	-0.771489	0.0392907	380.734	8.61498e-85	1.29471e-82	NW_005081653.1	922303	933218	-	3	Genome	Chr2
AHSA2P	617.866	-0.369464	0.0597532	38.0913	6.75091e-10	4.93191e-09	NW_005081577.1	3802749	3812702	+	3	Genome	Chr2
AIDA	509.897	-0.151088	0.0492301	9.41502	0.00215215	0.00608619	NW_005081821.1	328044	363487	+	3	Genome	Chr2
AKAP12	1595.04	-0.422236	0.0348609	146.5	1.00953e-33	3.79294e-32	NW_005081596.1	1597993	1614727	+	3	Genome	Chr2
AKT3	1108.42	-0.236066	0.0386053	37.3624	9.8097e-10	6.87987e-09	NW_005081620.1	1871641	2006775	-	3	Genome	Chr2
ALK	597.011	-0.266648	0.0520152	26.2432	3.01015e-07	1.60745e-06	NW_005081742.1	404906	709885	+	3	Genome	Chr2
ALKAL2	194.661	-1.28463	0.0855953	226.933	2.78161e-51	1.95083e-49	NW_005081609.1	581075	594005	+	3	Genome	Chr2
ANGEL2	220.758	0.322059	0.0931585	11.8809	0.000567124	0.00181895	NW_005081548.1	3501733	3517130	+	3	Genome	Chr2
ANKRD6	463.265	0.184669	0.0753884	5.96584	0.0145856	0.0333567	NW_005081553.1	4450554	4538690	+	3	Genome	Chr2
APLF	52.2401	-1.41231	0.162699	76.2338	2.51996e-18	3.78714e-17	NW_005081615.1	3400348	3421032	+	3	Genome	Chr2
ARHGAP18	316.689	0.329721	0.0588819	31.3789	2.12272e-08	1.32136e-07	NW_005081591.1	361148	463334	+	3	Genome	Chr2
ARID1B	421.396	-0.175052	0.0592112	8.72936	0.00313126	0.00848992	NW_005081596.1	3963850	4255992	+	3	Genome	Chr2
ARMT1	1139.88	-0.411248	0.0368191	124.689	5.95318e-29	1.49113e-27	NW_005081596.1	1668105	1676653	+	3	Genome	Chr2
ARV1	106.795	0.396028	0.122378	10.4085	0.0012544	0.00367583	NW_005081653.1	1061193	1066871	+	3	Genome	Chr2
ATP6V1C2	95.2812	-0.811492	0.149485	29.0583	7.02326e-08	4.01547e-07	NW_005081582.1	431766	454886	-	3	Genome	Chr2
B3GALNT2	267.701	0.35444	0.0838771	17.7753	2.48588e-05	9.86848e-05	NW_005081589.1	2839206	2858355	+	3	Genome	Chr2
B3GAT2	839.358	0.349218	0.0533508	42.7024	6.37341e-11	4.9725e-10	NW_005081553.1	142485	161736	+	3	Genome	Chr2
BABAM2	1408.98	-0.161539	0.0328106	24.2314	8.54285e-07	4.18004e-06	NW_005081548.1	9488969	9653305	-	3	Genome	Chr2
BAG2	276.475	0.64722	0.0869913	54.9849	1.21457e-13	1.21688e-12	NW_005081569.1	4770633	4776412	-	3	Genome	Chr2
BCKDHB	110.623	-0.456197	0.11865	14.7058	0.00012566	0.000457421	NW_005081569.1	1345044	1455354	+	3	Genome	Chr2
BICRAL	428.209	-0.230383	0.0639731	12.9366	0.000322227	0.00110418	NW_005081548.1	4948887	4994562	+	3	Genome	Chr2
BPNT1	200.782	0.493078	0.0980734	25.1095	5.41645e-07	2.73947e-06	NW_005081548.1	491857	500068	+	3	Genome	Chr2
BROX	756.098	0.143304	0.0403634	12.6021	0.00038531	0.00129504	NW_005081821.1	310511	327948	-	3	Genome	Chr2
BTBD3	1279.83	-0.200549	0.0356382	31.6495	1.8466e-08	1.16325e-07	NW_005081602.1	3423342	3434195	-	3	Genome	Chr2
C1D	233.722	-0.658205	0.0732553	80.8531	2.43131e-19	3.81753e-18	NW_005081615.1	3254190	3268208	-	3	Genome	Chr2
CALHM4	3.33597	-4.69874	1.42574	8.93669	0.00279499	0.00767711	NW_005081642.1	420558	423552	-	3	Genome	Chr2
CALM2	7281.29	-0.293164	0.0314	86.9753	1.09888e-20	1.9267e-19	NW_005081548.1	9193679	9202322	-	3	Genome	Chr2
CAPN11	637.872	0.335861	0.0459916	53.3197	2.83457e-13	2.76108e-12	NW_005081620.1	702426	715405	-	3	Genome	Chr2
CCDC167	143.146	0.769524	0.109913	48.7243	2.94588e-12	2.69484e-11	NW_005081620.1	480360	493512	+	3	Genome	Chr2
CCDC28A	619.682	-0.142905	0.047741	8.95331	0.00276967	0.00766762	NW_005081611.1	3400870	3407340	+	3	Genome	Chr2
CCN2	114.025	-0.465901	0.104727	19.7971	8.61148e-06	3.62371e-05	NW_005081729.1	518681	520790	-	3	Genome	Chr2
CCR6	24.4556	1.36501	0.248558	30.201	3.89511e-08	2.28919e-07	NW_005081574.1	753056	765468	-	3	Genome	Chr2
CCT4	826.587	-0.104256	0.0426585	5.96871	0.0145619	0.0333567	NW_005081577.1	4037880	4043197	-	3	Genome	Chr2
CD109	266.271	0.832906	0.234438	11.8855	0.000565726	0.00181895	NW_005081654.1	977479	1047341	+	3	Genome	Chr2
CD164	441.51	-0.486861	0.0574049	71.882	2.28459e-17	3.24782e-16	NW_005081561.1	1463258	1471520	+	3	Genome	Chr2
CDC42BPA	1570.61	-0.334844	0.0395703	71.4595	2.83008e-17	3.96966e-16	NW_005081602.1	529240	712881	+	3	Genome	Chr2
CEBPZ	804.475	-0.771653	0.0440784	306.308	1.39152e-68	1.62653e-66	NW_005081699.1	828737	843152	-	3	Genome	Chr2
CENPF	34.7739	2.64323	0.579517	16.5944	4.62875e-05	0.000177717	NW_005081548.1	2767537	2801628	-	3	Genome	Chr2
CENPW	70.1334	0.796935	0.142135	31.3527	2.15154e-08	1.33142e-07	NW_005081591.1	1964183	1974671	-	3	Genome	Chr2
CEP162	334.243	-0.340837	0.0618687	30.3413	3.62337e-08	2.15767e-07	NW_005081569.1	2968920	3013377	-	3	Genome	Chr2
CEP57L1	29.6597	2.16932	0.313405	45.4906	1.53374e-11	1.2908e-10	NW_005081561.1	1561326	1585093	-	3	Genome	Chr2
CEP68	135.679	0.275967	0.0943434	8.55099	0.00345335	0.00924409	NW_005081615.1	1900165	1908151	+	3	Genome	Chr2
CFAP61	110.174	-0.766538	0.102666	56.0051	7.22843e-14	7.38282e-13	NW_005081577.1	671217	753647	+	3	Genome	Chr2
CHRM3	354.744	-0.237053	0.073874	10.258	0.00136092	0.00396589	NW_005081589.1	1108081	1304818	-	3	Genome	Chr2
CMPK2	73.5585	-4.34194	0.46471	69.7875	6.605e-17	8.90828e-16	NW_005081582.1	2460384	2467571	+	3	Genome	Chr2
CNIH3	361.262	-0.352441	0.0997573	12.3066	0.000451348	0.00148846	NW_005081602.1	1496803	1543738	-	3	Genome	Chr2
CNKSR3	98.4461	-0.829725	0.147485	31.0977	2.4536e-08	1.50946e-07	NW_005081596.1	2933689	2988450	-	3	Genome	Chr2
CNRIP1	826.42	-0.288639	0.0445777	41.8783	9.71353e-11	7.4048e-10	NW_005081615.1	3355161	3366270	-	3	Genome	Chr2
COG2	390.481	-0.631135	0.0605886	108.454	2.13804e-25	4.59024e-24	NW_005081653.1	891790	922678	+	3	Genome	Chr2
COL12A1	555.721	-0.663858	0.0637875	107.664	3.18379e-25	6.69869e-24	NW_005081654.1	1505224	1605015	-	3	Genome	Chr2
COLEC11	96.6446	-0.931942	0.134087	47.909	4.46473e-12	3.98042e-11	NW_005081582.1	3716965	3762766	-	3	Genome	Chr2
COQ3	50.9831	-0.636288	0.199103	9.9714	0.00158991	0.00460053	NW_005081553.1	8613142	8619725	-	3	Genome	Chr2
COQ8A	353.063	-0.768374	0.0660253	135.327	2.79993e-31	8.18202e-30	NW_005081602.1	715342	758552	-	3	Genome	Chr2
CPSF3	133.219	-0.410856	0.11916	11.7848	0.000597171	0.00189796	NW_005081582.1	1254877	1273884	-	3	Genome	Chr2
CRLS1	1301.92	-0.154248	0.039398	15.3115	9.1162e-05	0.000335323	NW_005081615.1	837783	843224	+	3	Genome	Chr2
CRNKL1	180.008	-0.205421	0.0845357	5.89719	0.015165	0.0343088	NW_005081577.1	658531	671209	-	3	Genome	Chr2
CSMD1	479.755	-0.18185	0.0592421	9.40481	0.00216416	0.00610375	NW_005081609.1	2431647	3287877	-	3	Genome	Chr2
CUL9	377.213	-0.205324	0.0689243	8.84849	0.00293332	0.00801519	NW_005081602.1	96299	124795	+	3	Genome	Chr2
CUNH6orf120	128.687	-0.435001	0.110525	15.4163	8.62429e-05	0.000319463	NW_005081653.1	1635086	1639634	-	3	Genome	Chr2
DCBLD1	58.3514	-0.428083	0.150625	8.0519	0.00454558	0.0118659	NW_005081642.1	56325	102509	-	3	Genome	Chr2
DEGS1	463.719	-0.426384	0.0547985	60.5164	7.29677e-15	8.43539e-14	NW_005081602.1	1671835	1676655	-	3	Genome	Chr2
DISC1	135.509	-1.27161	0.110457	132.279	1.30019e-30	3.59946e-29	NW_005081589.1	4313836	4447333	-	3	Genome	Chr2
DLGAP2	554.661	-0.191945	0.0585041	10.7393	0.00104887	0.00315259	NW_005081609.1	1061212	1514790	+	3	Genome	Chr2
DPY30	187.441	-0.260649	0.100197	6.72494	0.00950742	0.0230424	NW_005081699.1	978948	984563	+	3	Genome	Chr2
DTD1	681.199	-0.300156	0.0419378	51.2389	8.17811e-13	7.68158e-12	NW_005081602.1	4010290	4024101	+	3	Genome	Chr2
DUSP10	169.779	0.319288	0.096508	10.9047	0.000959184	0.00290796	NW_005081832.1	232012	255845	+	3	Genome	Chr2
DZANK1	79.7421	0.331822	0.14474	5.20774	0.0224866	0.0490911	NW_005081602.1	3956752	3980657	-	3	Genome	Chr2
E2F6	1536.9	-0.258574	0.0411975	39.3154	3.60579e-10	2.65265e-09	NW_005081582.1	24475	46577	+	3	Genome	Chr2
ECHDC1	82.7533	-0.366673	0.146803	6.17013	0.0129925	0.0302393	NW_005081591.1	1551576	1595334	+	3	Genome	Chr2
EDARADD	100.225	0.846994	0.125802	45.1244	1.84903e-11	1.5428e-10	NW_005081589.1	2521104	2534395	-	3	Genome	Chr2
EEF1A1	8077.76	0.129378	0.0234304	30.4763	3.37965e-08	2.04333e-07	NW_005081654.1	913826	918554	-	3	Genome	Chr2
EFEMP1	203.175	-0.96113	0.108953	76.6982	1.99189e-18	3.03692e-17	NW_005081577.1	2056151	2100841	-	3	Genome	Chr2
EGLN1	660.104	-0.201557	0.0420331	22.9947	1.62451e-06	7.69812e-06	NW_005081653.1	150849	159318	+	3	Genome	Chr2
EHBP1	571.971	0.156631	0.0552983	8.00834	0.00465623	0.0120649	NW_005081615.1	1034124	1232305	+	3	Genome	Chr2
EHD3	2845.87	-0.257568	0.0265041	94.3844	2.59838e-22	4.97e-21	NW_005081602.1	363343	392669	+	3	Genome	Chr2
EIF2AK2	68.8971	0.374202	0.153031	5.92617	0.0149176	0.0338219	NW_005081574.1	4950757	4972569	+	3	Genome	Chr2
EIPR1	319.098	-0.244578	0.0745704	10.7227	0.00105831	0.0031719	NW_005081582.1	3847478	3921229	+	3	Genome	Chr2
ELOVL4	367.725	-0.220482	0.0628792	12.2779	0.000458356	0.00150288	NW_005081569.1	1192178	1229931	-	3	Genome	Chr2
EML6	163.837	-0.271537	0.0974813	7.73064	0.00542914	0.0138628	NW_005081577.1	1693414	1785269	+	3	Genome	Chr2
ENTPD6	1418.79	0.540327	0.0373382	208.982	2.29107e-47	1.50638e-45	NW_005081577.1	187563	200778	-	3	Genome	Chr2
EPAS1	2310.91	0.179968	0.034062	27.8844	1.28782e-07	7.24484e-07	NW_005081548.1	8618158	8658591	+	3	Genome	Chr2
EPB41L2	507.794	0.161876	0.0573048	7.96635	0.00476549	0.0122875	NW_005081729.1	41095	149789	-	3	Genome	Chr2
EPHA7	70.1702	-0.542481	0.141863	14.5665	0.000135297	0.000489116	NW_005081553.1	6061424	6224456	-	3	Genome	Chr2
EPM2A	423.003	1.32072	0.0580928	521.734	1.77537e-115	3.73538e-113	NW_005081611.1	1301773	1330662	+	3	Genome	Chr2
EPRS	941.236	-0.193368	0.0401954	23.1282	1.51552e-06	7.21413e-06	NW_005081548.1	503298	540756	+	3	Genome	Chr2
ERMARD	213.097	-0.596509	0.193633	9.14669	0.00249169	0.00691624	NW_005081653.1	1594348	1620775	-	3	Genome	Chr2
ERO1B	429.559	-0.333519	0.0541035	37.9981	7.08121e-10	5.06764e-09	NW_005081589.1	2551503	2575957	+	3	Genome	Chr2
ESF1	369.651	0.191118	0.0591779	10.4224	0.00124496	0.00366552	NW_005081602.1	2900478	2930748	+	3	Genome	Chr2
ESRRG	129.627	-0.3476	0.100657	11.9082	0.00055888	0.0018035	NW_005081548.1	1709670	2071828	+	3	Genome	Chr2
EYS	68.996	-0.440904	0.140107	9.87173	0.00167838	0.00482419	NW_005081553.1	2394077	3190387	+	3	Genome	Chr2
FAM110C	7.80748	-1.60219	0.59329	6.47654	0.0109308	0.026194	NW_005081609.1	763589	771057	+	3	Genome	Chr2
FAM135A	450.791	0.277814	0.0565672	24.0945	9.17215e-07	4.46717e-06	NW_005081553.1	284979	365767	-	3	Genome	Chr2
FAM228B	7.62341	3.78782	0.89925	12.6794	0.000369715	0.00125464	NW_005081561.1	3709948	3721541	-	3	Genome	Chr2
FAM49A	2061.18	-0.0871385	0.0303644	8.23189	0.00411607	0.0109071	NW_005081621.1	783325	823427	+	3	Genome	Chr2
FAM83B	42.2882	-0.555729	0.223351	6.00348	0.0142777	0.0327951	NW_005081569.1	5665430	5721543	-	3	Genome	Chr2
FAXC	1365.84	-0.184773	0.048697	14.3553	0.000151351	0.000539733	NW_005081553.1	8573375	8600423	-	3	Genome	Chr2
FBLN7	27.0996	-1.03128	0.251215	16.5804	4.6631e-05	0.000178385	NW_005081577.1	1267514	1273269	-	3	Genome	Chr2
FBXO25	341.223	-0.24287	0.0623308	15.1696	9.82709e-05	0.000360212	NW_005081609.1	859054	889810	+	3	Genome	Chr2
FBXO30	377.379	-0.295536	0.062456	22.3607	2.25952e-06	1.038e-05	NW_005081611.1	1262752	1280105	+	3	Genome	Chr2
FBXO9	1592.58	-0.167449	0.0278119	36.2532	1.73277e-09	1.19142e-08	NW_005081569.1	6332159	6351151	-	3	Genome	Chr2
FGFR1OP	520.306	-0.259293	0.0506374	26.2082	3.06515e-07	1.62856e-06	NW_005081574.1	777519	801004	-	3	Genome	Chr2
FIG4	330.206	-0.991899	0.0709706	194.919	2.68344e-44	1.48578e-42	NW_005081561.1	1317339	1372551	-	3	Genome	Chr2
FLRT3	278.254	-0.196436	0.0749	6.86267	0.00880148	0.0215329	NW_005081602.1	2733443	2745848	+	3	Genome	Chr2
FLVCR1	921.018	-0.223038	0.043894	25.7873	3.81192e-07	1.96575e-06	NW_005081548.1	3563183	3578397	-	3	Genome	Chr2
FMN2	345.046	-0.339705	0.0616607	30.3375	3.63031e-08	2.15767e-07	NW_005081589.1	920023	1071952	-	3	Genome	Chr2
FOSL2	215.61	0.250646	0.0877398	8.1334	0.00434573	0.0114008	NW_005081548.1	9442825	9453965	-	3	Genome	Chr2
FOXO3	454.496	-0.311109	0.0608422	26.0912	3.25673e-07	1.72165e-06	NW_005081561.1	1808903	1824873	-	3	Genome	Chr2
FUCA2	150.85	-0.711099	0.09946	50.9952	9.25942e-13	8.62027e-12	NW_005081632.1	926890	938315	+	3	Genome	Chr2
GALNT14	117.429	0.37383	0.116347	10.2659	0.00135515	0.00396004	NW_005081602.1	217501	316180	-	3	Genome	Chr2
GEMIN6	130.87	0.256987	0.101421	6.40616	0.0113725	0.027129	NW_005081615.1	191187	196002	-	3	Genome	Chr2
GFRAL	357.185	-0.486365	0.0789722	37.6865	8.30779e-10	5.86563e-09	NW_005081569.1	5529844	5553595	-	3	Genome	Chr2
GGPS1	847.726	0.295807	0.0392393	56.8289	4.7543e-14	4.95201e-13	NW_005081589.1	2886477	2909836	-	3	Genome	Chr2
GINM1	342.88	0.20827	0.0619681	11.286	0.000780956	0.00240928	NW_005081596.1	904184	922740	+	3	Genome	Chr2
GLO1	1575.7	-0.893862	0.0385824	533.514	4.85847e-118	1.27778e-115	NW_005081548.1	11696849	11704220	+	3	Genome	Chr2
GLP1R	416.402	-0.480078	0.0630598	57.8294	2.85859e-14	3.10025e-13	NW_005081548.1	11484788	11568286	-	3	Genome	Chr2
GNG4	104.958	-0.447153	0.116758	14.6173	0.000131699	0.000477749	NW_005081589.1	2806259	2819955	+	3	Genome	Chr2
GNPAT	766.31	-0.391086	0.0411735	90.2415	2.10796e-21	3.89049e-20	NW_005081653.1	1159608	1179847	+	3	Genome	Chr2
GPATCH11	442.615	0.477714	0.0512226	87.0955	1.03406e-20	1.84379e-19	NW_005081574.1	4966422	4981314	-	3	Genome	Chr2
GPATCH2	587.817	-0.353502	0.0452684	61.007	5.6871e-15	6.64758e-14	NW_005081548.1	1446164	1566114	+	3	Genome	Chr2
GPCPD1	479.566	0.265242	0.0570196	21.61	3.34107e-06	1.50703e-05	NW_005081615.1	684157	726204	-	3	Genome	Chr2
GPR6	51.0662	0.565161	0.197067	8.04297	0.00456806	0.011895	NW_005081561.1	1295783	1296796	-	3	Genome	Chr2
GPR63	115.734	-0.728135	0.117719	38.0552	6.87712e-10	4.98947e-09	NW_005081553.1	7366422	7379617	-	3	Genome	Chr2
GREB1	960.387	1.03919	0.189789	28.4751	9.49102e-08	5.36804e-07	NW_005081621.1	3100814	3165186	-	3	Genome	Chr2
GRIK2	654.284	-0.241188	0.0587137	16.8212	4.1071e-05	0.000158266	NW_005081553.1	9599632	9963922	+	3	Genome	Chr2
GTF2H5	800.373	-0.518055	0.046988	121.329	3.23722e-28	7.5679e-27	NW_005081632.1	316356	321195	+	3	Genome	Chr2
GTPBP2	507.011	-0.127219	0.0491146	6.70671	0.00960508	0.0231756	NW_005081574.1	3753666	3762244	+	3	Genome	Chr2
HBS1L	195.719	-0.456396	0.100902	20.3044	6.60483e-06	2.89512e-05	NW_005081596.1	157125	216143	-	3	Genome	Chr2
HDAC2	280.383	-0.165456	0.0671276	6.07028	0.0137475	0.0318507	NW_005081642.1	1462469	1479152	+	3	Genome	Chr2
HEATR1	185.785	-0.312337	0.089401	12.1724	0.000485023	0.00158461	NW_005081589.1	2462853	2497711	+	3	Genome	Chr2
HECA	2350.53	-0.0903526	0.0256851	12.3727	0.000435662	0.00144579	NW_005081611.1	3521928	3547150	+	3	Genome	Chr2
HEY2	178.099	-0.319429	0.106386	8.9455	0.00278154	0.00767711	NW_005081591.1	2229291	2240672	-	3	Genome	Chr2
HINT3	480.092	-0.353428	0.0608968	33.5991	6.7725e-09	4.42526e-08	NW_005081591.1	2124662	2131554	-	3	Genome	Chr2
HMGCLL1	686.612	0.126845	0.0502276	6.36853	0.0116162	0.0275661	NW_005081569.1	5472658	5524810	+	3	Genome	Chr2
HNRNPLL	1087.29	-0.19435	0.0352408	30.4096	3.49792e-08	2.10275e-07	NW_005081615.1	235053	253468	+	3	Genome	Chr2
HNRNPU	1832.86	-0.383483	0.029895	164.476	1.19068e-37	5.44607e-36	NW_005081620.1	2315380	2330008	-	3	Genome	Chr2
HSP90AB1	2867.53	-0.114042	0.0385859	8.71983	0.00314768	0.00851249	NW_005081620.1	632318	639160	-	3	Genome	Chr2
HTR1B	444.085	-0.198827	0.0584492	11.5551	0.000675648	0.00211542	NW_005081569.1	377554	381286	-	3	Genome	Chr2
HTR1E	34.0923	-0.678626	0.199382	11.5599	0.000673888	0.00211542	NW_005081569.1	3831418	3867770	+	3	Genome	Chr2
IAH1	280.492	-0.332315	0.0756284	19.2565	1.1428e-05	4.73316e-05	NW_005081582.1	1248450	1254324	-	3	Genome	Chr2
IARS2	726.286	0.323783	0.0466509	48.1183	4.01258e-12	3.60789e-11	NW_005081548.1	461922	487724	-	3	Genome	Chr2
IFNGR1	635.653	-0.263942	0.0567076	21.6036	3.35214e-06	1.50703e-05	NW_005081611.1	2709193	2731480	-	3	Genome	Chr2
IGF2R	599.486	0.245358	0.0481299	25.9704	3.46699e-07	1.81456e-06	NW_005081596.1	504656	560828	-	3	Genome	Chr2
INTS7	232.015	-0.21022	0.0809856	6.72108	0.00952798	0.0230424	NW_005081548.1	3862035	3887398	+	3	Genome	Chr2
IPCEF1	383.451	-0.386887	0.0590939	42.846	5.92223e-11	4.68435e-10	NW_005081596.1	2846517	2892594	-	3	Genome	Chr2
ITSN2	519.972	-0.187735	0.0560168	11.2143	0.000811691	0.0024895	NW_005081561.1	3630938	3711509	+	3	Genome	Chr2
JAG1	107.277	0.379719	0.109068	12.1045	0.000502993	0.00163823	NW_005081577.1	5619664	5654114	-	3	Genome	Chr2
KBTBD11	3403.97	-0.0941618	0.0268016	12.3382	0.000443787	0.00146813	NW_005081609.1	1677696	1700707	+	3	Genome	Chr2
KCNK12	659.764	-0.272365	0.0503186	29.2559	6.34227e-08	3.64594e-07	NW_005081662.1	137933	150530	-	3	Genome	Chr2
KCNK2	126.109	0.287213	0.115576	6.136	0.0132456	0.0307603	NW_005081548.1	2584149	2715073	-	3	Genome	Chr2
KCNK5	92.2823	-0.802487	0.123099	42.456	7.22904e-11	5.55106e-10	NW_005081548.1	11381424	11416202	+	3	Genome	Chr2
KCNQ5	273.12	-0.453107	0.0877099	26.5249	2.60159e-07	1.39636e-06	NW_005081654.1	589746	866865	+	3	Genome	Chr2
KIDINS220	1224.68	-0.0987806	0.031993	9.532	0.0020192	0.0057256	NW_005081582.1	1535069	1602871	+	3	Genome	Chr2
KIF25	241.122	1.37723	0.108276	158.011	3.07837e-36	1.34935e-34	NW_005081574.1	309193	350508	-	3	Genome	Chr2
KIF6	74.0623	0.722399	0.141645	25.8907	3.61304e-07	1.87238e-06	NW_005081548.1	11104154	11265635	+	3	Genome	Chr2
KIZ	146.515	-0.242372	0.0927598	6.81849	0.00902191	0.022021	NW_005081577.1	930082	961638	+	3	Genome	Chr2
KLC4	1424.4	-0.193451	0.0343318	31.7317	1.77013e-08	1.1218e-07	NW_005081602.1	15797	29803	+	3	Genome	Chr2
KPNA5	536.639	-0.374112	0.0514325	52.8728	3.55867e-13	3.40338e-12	NW_005081642.1	375096	395341	-	3	Genome	Chr2
LAMP5	260.85	-0.224906	0.0892844	6.30627	0.0120311	0.0283784	NW_005081577.1	5214972	5224730	+	3	Genome	Chr2
LBR	474.803	0.178123	0.0547652	10.5688	0.0011501	0.00339862	NW_005081602.1	1441231	1453194	+	3	Genome	Chr2
LCA5	80.0591	-0.464319	0.128438	13.0409	0.000304756	0.00104772	NW_005081569.1	1056489	1074118	-	3	Genome	Chr2
LCLAT1	891.421	0.20045	0.0445009	20.2661	6.73836e-06	2.94139e-05	NW_005081742.1	48299	164028	-	3	Genome	Chr2
LDAH	1645.49	-0.116204	0.0318305	13.3224	0.000262254	0.000904562	NW_005081561.1	5867649	5966501	+	3	Genome	Chr2
LGALSL	947.056	-0.209384	0.0405927	26.5893	2.51628e-07	1.3575e-06	NW_005081615.1	1639872	1648524	+	3	Genome	Chr2
LMBRD1	318.744	-0.465739	0.0843908	30.2426	3.81238e-08	2.25316e-07	NW_005081553.1	693345	760718	+	3	Genome	Chr2
LOC102060438	347.632	-0.605178	0.0617021	96.2478	1.01369e-22	1.97482e-21	NW_005081574.1	3737471	3748682	+	3	Genome	Chr2
LOC102060631	4097.51	-0.423077	0.0305373	191.382	1.58711e-43	8.34818e-42	NW_005081602.1	3785986	3788250	-	3	Genome	Chr2
LOC102062130	16.5824	-5.5756	0.69004	75.4456	3.75624e-18	5.56558e-17	NW_005081662.1	693046	774774	-	3	Genome	Chr2
LOC102062283	110.272	0.336391	0.117243	8.19755	0.00419469	0.0110597	NW_005081548.1	5800144	5807442	-	3	Genome	Chr2
LOC102062622	124.875	-0.473432	0.13677	11.8042	0.000590976	0.00188396	NW_005081876.1	208051	216485	+	3	Genome	Chr2
LOC102062779	14.0861	2.60942	0.47635	27.8641	1.30139e-07	7.28226e-07	NW_005081611.1	3023100	3039444	-	3	Genome	Chr2
LOC102062802	938.635	0.335389	0.040526	68.4449	1.30473e-16	1.73744e-15	NW_005081876.1	217613	227702	-	3	Genome	Chr2
LOC102062840	98.5008	-0.825395	0.121751	45.87	1.26367e-11	1.07208e-10	NW_005081577.1	1365217	1376822	-	3	Genome	Chr2
LOC102063416	148.338	-0.600816	0.105407	32.3278	1.30237e-08	8.45734e-08	NW_005081577.1	5398826	5404127	+	3	Genome	Chr2
LOC102063895	457.085	-0.161931	0.0512261	9.98942	0.00157442	0.00457538	NA	NA	NA	NA	NA	NA	NA
LOC102064078	29.4415	-0.8975	0.237295	14.0915	0.000174126	0.000612643	NW_005081653.1	26746	38322	-	3	Genome	Chr2
LOC102064984	21.0041	-1.56494	0.36987	17.1226	3.50423e-05	0.000135531	NW_005081553.1	4351005	4386785	-	3	Genome	Chr2
LOC102065150	2030.81	0.136282	0.0270831	25.3173	4.86322e-07	2.48355e-06	NW_005081548.1	225748	232709	-	3	Genome	Chr2
LOC102065273	246.868	-0.854987	0.0730188	137.457	9.58069e-32	2.96438e-30	NW_005081577.1	1893007	1897379	+	3	Genome	Chr2
LOC102065341	53.3064	-1.09804	0.237675	20.1268	7.24748e-06	3.12473e-05	NA	NA	NA	NA	NA	NA	NA
LOC102065471	5.31969	-2.42798	0.860832	7.54087	0.00603148	0.0152527	NW_005081615.1	957388	966410	+	3	Genome	Chr2
LOC102065846	190.999	-0.324294	0.118077	7.43788	0.0063865	0.0160348	NA	NA	NA	NA	NA	NA	NA
LOC102066018	264.091	2.20205	0.0981674	497.345	3.59495e-110	6.30315e-108	NW_005081602.1	3684267	3691625	+	3	Genome	Chr2
LOC102066248	387.833	-0.259096	0.064169	16.2696	5.49383e-05	0.000207151	NW_005081569.1	6382106	6391140	+	3	Genome	Chr2
LOC102066490	180.777	0.361617	0.0970721	13.8083	0.000202445	0.000702878	NW_005081602.1	29930	34528	+	3	Genome	Chr2
LOC102066536	2.41354	-4.0041	1.67506	5.2073	0.0224923	0.0490911	NW_005081569.1	6394426	6412159	+	3	Genome	Chr2
LOC102066673	31.453	0.715388	0.22954	9.55185	0.00199748	0.00567932	NW_005081620.1	44257	80271	-	3	Genome	Chr2
LOC102067096	298.682	-0.162532	0.065959	6.06666	0.0137757	0.0318507	NW_005081742.1	347780	353803	+	3	Genome	Chr2
LOC102067187	66.1779	-0.80813	0.147435	29.9701	4.38759e-08	2.55014e-07	NA	NA	NA	NA	NA	NA	NA
LOC102067897	165.578	0.338443	0.104528	10.4188	0.00124739	0.00366552	NW_005081548.1	9787370	9895593	+	3	Genome	Chr2
LOC102068269	67.1146	-0.530735	0.15488	11.6475	0.000642904	0.00202552	NW_005081574.1	4872322	4874935	-	3	Genome	Chr2
LOC102068329	150.164	-0.264422	0.0866165	9.32004	0.0022666	0.00637558	NW_005081589.1	3296856	3298685	-	3	Genome	Chr2
LOC102070236	2.84159	3.58814	1.30427	6.03893	0.0139937	0.0322838	NA	NA	NA	NA	NA	NA	NA
LOC102070362	46.4032	0.55562	0.214169	6.54607	0.0105116	0.0252471	NA	NA	NA	NA	NA	NA	NA
LOC102070476	787.845	-0.361996	0.0401636	81.2564	1.98248e-19	3.20856e-18	NW_005081611.1	5495	531707	-	3	Genome	Chr2
LOC102071828	84.7823	-0.96335	0.122005	62.6525	2.46586e-15	2.98171e-14	NW_005081569.1	2892436	2922541	+	3	Genome	Chr2
LOC102072471	5.29167	-2.24937	0.863075	5.83891	0.0156755	0.0352365	NA	NA	NA	NA	NA	NA	NA
LOC102073633	299.172	-0.511646	0.0680447	56.5051	5.60531e-14	5.78116e-13	NW_005081548.1	4114165	4118829	-	3	Genome	Chr2
LOC102073706	269.234	-0.812244	0.0708962	131.521	1.90455e-30	5.13739e-29	NA	NA	NA	NA	NA	NA	NA
LOC102074043	12.5607	-1.99657	0.59429	8.85795	0.00291815	0.00799452	NW_005081561.1	2833434	2845929	+	3	Genome	Chr2
LOC102074112	148.339	-2.02535	0.149096	176.679	2.57313e-40	1.23043e-38	NW_005081642.1	439799	444037	-	3	Genome	Chr2
LOC102074465	180.816	-0.236056	0.0841054	7.86941	0.00502782	0.0129006	NW_005081577.1	1215991	1223946	+	3	Genome	Chr2
LOC102074649	5821.03	-0.204742	0.0283244	52.1907	5.03641e-13	4.77324e-12	NW_005081577.1	1233522	1240159	-	3	Genome	Chr2
LOC102074665	25.6612	-3.24032	0.359971	81.4013	1.84239e-19	3.02843e-18	NW_005081620.1	2304231	2306462	+	3	Genome	Chr2
LOC106629218	53.2442	1.01481	0.164587	38.0217	6.99624e-10	5.04113e-09	NW_005081548.1	11279599	11307902	+	3	Genome	Chr2
LOC106629220	85.814	1.03748	0.135513	58.3765	2.16466e-14	2.42258e-13	NA	NA	NA	NA	NA	NA	NA
LOC106629369	10.7949	2.88661	0.618582	18.4988	1.70016e-05	6.9594e-05	NA	NA	NA	NA	NA	NA	NA
LOC106629377	115.097	-0.383189	0.149949	6.39407	0.0114502	0.0272525	NW_005081577.1	762222	774607	+	3	Genome	Chr2
LOC106629378	49.2963	0.460708	0.183063	6.27167	0.0122684	0.028724	NA	NA	NA	NA	NA	NA	NA
LOC106629466	25.6905	1.2799	0.410532	8.454	0.00364241	0.00972541	NA	NA	NA	NA	NA	NA	NA
LOC106629504	275.536	-0.479373	0.0726377	43.4986	4.24259e-11	3.40703e-10	NA	NA	NA	NA	NA	NA	NA
LOC106629714	73.1407	0.960051	0.140298	46.7734	7.96875e-12	6.87142e-11	NA	NA	NA	NA	NA	NA	NA
LOC113458737	153.724	0.22018	0.0962818	5.21502	0.0223926	0.0490911	NA	NA	NA	NA	NA	NA	NA
LOC113458741	47.1314	-0.454636	0.194674	5.36032	0.0206	0.0458164	NA	NA	NA	NA	NA	NA	NA
LOC113458750	57.226	-2.39723	0.204816	137.03	1.18791e-31	3.57052e-30	NA	NA	NA	NA	NA	NA	NA
LOC113458752	55.314	-2.79124	0.508924	24.6045	7.03854e-07	3.54285e-06	NA	NA	NA	NA	NA	NA	NA
LOC113458759	12.2408	3.41217	0.610849	27.6946	1.42056e-07	7.82424e-07	NA	NA	NA	NA	NA	NA	NA
LOC113458760	7.96312	-5.15504	1.75174	5.20096	0.0225744	0.0491682	NA	NA	NA	NA	NA	NA	NA
LOC113458863	2.82715	3.39259	1.26396	6.26899	0.0122869	0.028724	NA	NA	NA	NA	NA	NA	NA
LOC113458864	11.518	6.16729	0.844998	54.4965	1.55727e-13	1.53107e-12	NA	NA	NA	NA	NA	NA	NA
LOC113458866	6.49737	-4.1117	0.872812	18.7519	1.48876e-05	6.11786e-05	NA	NA	NA	NA	NA	NA	NA
LOC113459042	22.3583	-3.18363	0.430257	49.3408	2.15141e-12	1.98534e-11	NA	NA	NA	NA	NA	NA	NA
LOC113459045	3.57982	-4.44537	1.20712	11.6967	0.000626119	0.00198397	NA	NA	NA	NA	NA	NA	NA
LOC113459046	10.2456	-3.25214	0.72571	15.348	8.94172e-05	0.000330059	NA	NA	NA	NA	NA	NA	NA
LOC113459138	4.68519	-5.39731	1.12951	20.1764	7.06198e-06	3.05728e-05	NA	NA	NA	NA	NA	NA	NA
LOC113459140	365.87	-0.967338	0.083905	131.248	2.18541e-30	5.74763e-29	NA	NA	NA	NA	NA	NA	NA
LOC113459141	30.7737	-1.15382	0.263292	18.4414	1.75208e-05	7.11655e-05	NA	NA	NA	NA	NA	NA	NA
LOC113459148	1996.23	-0.125853	0.0311342	16.3315	5.31732e-05	0.000201943	NW_005081569.1	5024559	5033224	+	3	Genome	Chr2
LOC113459204	24.9281	-4.62218	0.780203	24.3315	8.1101e-07	4.02445e-06	NA	NA	NA	NA	NA	NA	NA
LOC113459212	7.7643	-5.73489	0.951346	33.8487	5.95683e-09	3.94125e-08	NA	NA	NA	NA	NA	NA	NA
LOC113459213	805.19	-0.386933	0.045834	71.1791	3.26219e-17	4.51556e-16	NA	NA	NA	NA	NA	NA	NA
LOC113459215	51.9392	1.32909	0.214702	36.9538	1.20961e-09	8.4272e-09	NA	NA	NA	NA	NA	NA	NA
LOC113459244	110.326	-0.290714	0.119446	5.89069	0.0152212	0.0343619	NW_005081577.1	1242562	1251365	+	3	Genome	Chr2
LOC113459245	7.0326	2.29129	0.775587	6.34683	0.0117592	0.0277992	NA	NA	NA	NA	NA	NA	NA
LOC113459246	4.96924	-3.36344	1.12635	6.66581	0.00982801	0.0236592	NA	NA	NA	NA	NA	NA	NA
LOC113459249	367.526	-0.47664	0.0698464	46.4127	9.57923e-12	8.19297e-11	NA	NA	NA	NA	NA	NA	NA
LOC113459252	230.252	-1.29009	0.0824141	246.074	1.86356e-55	1.50805e-53	NA	NA	NA	NA	NA	NA	NA
LOC113459313	25.1173	2.313	0.304682	56.8457	4.7139e-14	4.95201e-13	NA	NA	NA	NA	NA	NA	NA
LOC113459358	16.1254	2.39025	0.437725	27.7284	1.39599e-07	7.72936e-07	NA	NA	NA	NA	NA	NA	NA
LOC113459366	27.0582	-1.61605	0.271166	34.834	3.59054e-09	2.40589e-08	NA	NA	NA	NA	NA	NA	NA
LOC113459377	6.90065	-6.07531	0.93597	41.1381	1.41846e-10	1.06587e-09	NA	NA	NA	NA	NA	NA	NA
LOC113459407	36.871	-5.73469	0.819944	34.3037	4.71488e-09	3.13928e-08	NA	NA	NA	NA	NA	NA	NA
LOC113459413	30.4279	1.22324	0.223588	29.8725	4.61408e-08	2.66704e-07	NA	NA	NA	NA	NA	NA	NA
LOC113459462	1043.86	0.326359	0.036003	82.1689	1.24941e-19	2.08631e-18	NA	NA	NA	NA	NA	NA	NA
LOC113459466	6.24566	5.36546	0.9428	31.0438	2.52273e-08	1.53405e-07	NA	NA	NA	NA	NA	NA	NA
LOC113459543	17.2942	-2.66414	0.62233	14.2042	0.000164007	0.000580927	NA	NA	NA	NA	NA	NA	NA
LOC113459545	10.1393	1.81328	0.608709	7.27535	0.00699071	0.0173449	NA	NA	NA	NA	NA	NA	NA
LOC113459572	18.434	-5.89455	1.3078	10.6622	0.00109345	0.00325868	NA	NA	NA	NA	NA	NA	NA
LOC113459573	62.0779	1.67419	0.251444	40.6303	1.83928e-10	1.37228e-09	NA	NA	NA	NA	NA	NA	NA
LOC113459574	25.8021	2.20632	0.322934	45.1102	1.8625e-11	1.5428e-10	NA	NA	NA	NA	NA	NA	NA
LOC113459607	733.876	0.182497	0.0385202	22.4501	2.1568e-06	9.95153e-06	NA	NA	NA	NA	NA	NA	NA
LOC113459615	3.72396	3.34106	1.22823	5.92914	0.0148925	0.0338219	NA	NA	NA	NA	NA	NA	NA
LOC113459616	17.2874	-6.42008	1.11905	20.2037	6.96193e-06	3.02642e-05	NA	NA	NA	NA	NA	NA	NA
LOC113459681	15.3964	-2.19942	0.439276	23.5114	1.24174e-06	6.01987e-06	NA	NA	NA	NA	NA	NA	NA
LOC113459726	16.9558	-5.17904	0.672624	59.5618	1.18512e-14	1.35516e-13	NA	NA	NA	NA	NA	NA	NA
LOC113459787	97.3707	-1.59013	0.13344	142.403	7.94049e-33	2.78446e-31	NA	NA	NA	NA	NA	NA	NA
LRP11	1938.97	-0.333472	0.032694	103.91	2.11712e-24	4.20228e-23	NW_005081596.1	1029361	1042217	-	3	Genome	Chr2
LRPPRC	892.605	-0.290929	0.0512416	32.1442	1.43146e-08	9.12663e-08	NW_005081548.1	7215489	7292568	-	3	Genome	Chr2
LRRC1	225.153	-0.254056	0.0886314	8.17996	0.00423557	0.0111396	NW_005081569.1	6033008	6102272	-	3	Genome	Chr2
LTBP1	59.6606	-1.40337	0.187424	54.9366	1.24484e-13	1.23544e-12	NW_005081574.1	4046046	4231553	-	3	Genome	Chr2
LTV1	535.334	0.354187	0.0528457	44.8818	2.09294e-11	1.7068e-10	NW_005081632.1	775138	785102	-	3	Genome	Chr2
LYPLAL1	67.0167	-0.517615	0.13976	13.6906	0.000215532	0.000745855	NW_005081548.1	812666	838641	-	3	Genome	Chr2
LYST	983.819	-0.327965	0.0429356	58.2639	2.29214e-14	2.53825e-13	NW_005081589.1	2714348	2802997	+	3	Genome	Chr2
MANEA	408.592	-0.651513	0.0722199	80.8762	2.40316e-19	3.81753e-18	NW_005081553.1	6960029	6972883	+	3	Genome	Chr2
MAP3K21	560.143	-0.40648	0.0546156	55.2955	1.03708e-13	1.04905e-12	NW_005081589.1	3650445	3691409	-	3	Genome	Chr2
MAP3K5	132.935	0.40469	0.108093	13.9568	0.000187057	0.000653767	NW_005081611.1	2465623	2563486	-	3	Genome	Chr2
MAP3K7	632.961	0.456953	0.0568501	64.3946	1.01835e-15	1.26036e-14	NW_005081553.1	4949665	4997583	-	3	Genome	Chr2
MAP7	455.017	-0.12478	0.0535702	5.42202	0.0198843	0.0444125	NW_005081611.1	2353795	2452887	-	3	Genome	Chr2
MBOAT2	981.329	-0.435136	0.0349035	155.593	1.0392e-35	4.20477e-34	NW_005081582.1	1448661	1524206	+	3	Genome	Chr2
MCFD2	1314.45	-0.139288	0.0516979	7.23491	0.00714995	0.0176982	NW_005081548.1	8972599	8978247	-	3	Genome	Chr2
MDGA1	326.811	-0.49551	0.0715637	47.8101	4.69574e-12	4.15119e-11	NW_005081620.1	275779	367678	+	3	Genome	Chr2
MDN1	253.267	-0.217612	0.0797753	7.41898	0.00645394	0.0161656	NW_005081553.1	4540917	4627627	-	3	Genome	Chr2
MEA1	1007.93	-0.32353	0.0397391	66.2298	4.013e-16	5.14839e-15	NW_005081577.1	98242	99572	+	3	Genome	Chr2
MED23	610.052	-0.323478	0.0493627	42.9047	5.74723e-11	4.58037e-10	NW_005081729.1	346650	384400	-	3	Genome	Chr2
MEIS1	104.355	-0.304421	0.121111	6.28677	0.0121643	0.0285643	NW_005081615.1	2458778	2566401	+	3	Genome	Chr2
MFSD4B	844.705	0.51035	0.0418737	148.497	3.69375e-34	1.43919e-32	NW_005081561.1	689647	700554	-	3	Genome	Chr2
MGME1	50.2376	-0.869047	0.192472	20.0153	7.6824e-06	3.29873e-05	NW_005081602.1	3903835	3911455	+	3	Genome	Chr2
MKKS	630.252	-0.601812	0.0430005	196.372	1.29268e-44	7.55499e-43	NW_005081577.1	5535192	5542568	-	3	Genome	Chr2
MMS22L	8.92639	1.59686	0.611171	5.85165	0.0155625	0.0350572	NW_005081553.1	7569975	7660583	-	3	Genome	Chr2
MOCS1	404.386	0.172359	0.0605807	8.08303	0.00446818	0.0116928	NW_005081548.1	10842196	10872418	+	3	Genome	Chr2
MOXD1	20.3677	-0.949134	0.321578	8.39054	0.0037718	0.0100454	NW_005081729.1	722652	759529	-	3	Genome	Chr2
MRAP2	123.835	-1.47039	0.131647	123.042	1.36507e-28	3.33966e-27	NW_005081569.1	2953326	2964960	+	3	Genome	Chr2
MRPL33	270.849	0.319476	0.0691275	21.3486	3.8291e-06	1.71413e-05	NW_005081548.1	9725306	9731002	-	3	Genome	Chr2
MRPS18A	517.483	0.423769	0.0647095	42.7001	6.38106e-11	4.9725e-10	NW_005081620.1	1237874	1260176	+	3	Genome	Chr2
MRPS5	334.757	0.368984	0.0573284	41.4709	1.19639e-10	9.05468e-10	NW_005081615.1	644149	671342	+	3	Genome	Chr2
MSH2	179.17	0.371143	0.0843551	19.3456	1.09072e-05	4.54036e-05	NW_005081662.1	70957	119370	+	3	Genome	Chr2
MTA3	858.345	0.205184	0.0428426	22.9166	1.6918e-06	7.94542e-06	NW_005081548.1	5762030	5994678	+	3	Genome	Chr2
MTFR2	177.58	-0.295496	0.106173	7.68656	0.00556336	0.0141368	NW_005081611.1	2279848	2289473	-	3	Genome	Chr2
MTO1	405.746	-0.248916	0.0660751	14.153	0.00016853	0.000594943	NW_005081654.1	898118	905255	+	3	Genome	Chr2
MTR	158.489	-0.799383	0.103699	59.1037	1.49579e-14	1.69201e-13	NW_005081589.1	2317995	2369564	-	3	Genome	Chr2
MYB	37.7784	-0.60619	0.205944	8.55678	0.00344239	0.00923824	NW_005081596.1	263410	289364	+	3	Genome	Chr2
MYT1L	474.818	-0.271481	0.067569	16.0801	6.07186e-05	0.000228128	NW_005081582.1	4217948	4533610	+	3	Genome	Chr2
NANP	273.932	-0.320073	0.0735652	18.8969	1.37976e-05	5.69217e-05	NW_005081574.1	4945575	4950054	-	3	Genome	Chr2
NCOA7	1561.45	-0.190459	0.0322512	34.8602	3.54255e-09	2.38895e-08	NW_005081591.1	2133706	2209866	-	3	Genome	Chr2
NDUFAF5	71.6515	-1.63639	0.140267	139.052	4.29078e-32	1.4106e-30	NW_005081602.1	2892229	2900418	-	3	Genome	Chr2
NDUFAF7	154.299	0.300788	0.0956885	9.85758	0.00169133	0.00484817	NW_005081699.1	843260	850035	+	3	Genome	Chr2
NENF	312.088	-0.534374	0.0607926	77.4151	1.38552e-18	2.14348e-17	NW_005081548.1	3728264	3732969	-	3	Genome	Chr2
NFKBIE	328.256	-0.790848	0.0682711	134.093	5.21458e-31	1.48263e-29	NW_005081620.1	608324	621444	+	3	Genome	Chr2
NID1	323.881	-0.631141	0.0732837	73.8996	8.2192e-18	1.20092e-16	NW_005081589.1	2627523	2670714	+	3	Genome	Chr2
NOL10	115.504	-0.305979	0.116359	6.87884	0.00872222	0.0213887	NW_005081582.1	454964	507658	+	3	Genome	Chr2
NR2E1	141.613	-0.384752	0.11434	11.2416	0.000799825	0.00246028	NW_005081561.1	2013085	2031756	-	3	Genome	Chr2
NRXN1	3101.36	-0.152763	0.027402	31.0629	2.49799e-08	1.52784e-07	NW_005081662.1	1029890	1717427	-	3	Genome	Chr2
NSL1	358.57	0.2747	0.0658961	17.3489	3.11084e-05	0.000121207	NW_005081548.1	3601273	3610776	+	3	Genome	Chr2
NT5E	184.734	-0.314597	0.0896655	12.277	0.000458577	0.00150288	NW_005081569.1	3500853	3527567	+	3	Genome	Chr2
NTPCR	361.509	-2.80537	0.0906475	951.604	5.94411e-209	3.1266e-206	NW_005081589.1	3852325	3866096	-	3	Genome	Chr2
NUP133	190.104	0.190385	0.0806767	5.564	0.0183335	0.0411234	NW_005081653.1	465280	494720	-	3	Genome	Chr2
NUS1	541.525	0.15539	0.0510917	9.24194	0.00236535	0.00660038	NW_005081697.1	10636	20458	+	3	Genome	Chr2
OGFRL1	1193.28	-0.216573	0.0508328	18.0924	2.10441e-05	8.43093e-05	NW_005081553.1	6181	19458	+	3	Genome	Chr2
OPN5	36.1118	0.625773	0.232509	7.04197	0.00796215	0.0195705	NW_005081561.1	2865770	2901203	+	3	Genome	Chr2
OPRM1	3153.99	-0.219159	0.0235393	86.6616	1.28771e-20	2.22076e-19	NW_005081596.1	2829913	2839310	+	3	Genome	Chr2
PACRG	145.351	0.60004	0.100166	35.8081	2.17738e-09	1.47781e-08	NW_005081574.1	2621036	2831876	-	3	Genome	Chr2
PAK5	211.465	-0.331838	0.0875888	14.305	0.000155449	0.000552475	NW_005081577.1	5227680	5416404	-	3	Genome	Chr2
PCMT1	2023.72	-0.301275	0.029496	104.264	1.7708e-24	3.58246e-23	NW_005081596.1	989676	1023736	+	3	Genome	Chr2
PCSK2	2024.21	-0.716966	0.0277573	667.269	3.9213e-147	1.37507e-144	NW_005081883.1	19156	128705	+	3	Genome	Chr2
PDCD2	169.029	0.28146	0.089072	9.96919	0.00159182	0.00460053	NW_005081653.1	1180015	1184789	+	3	Genome	Chr2
PDE10A	407.784	-0.164441	0.0591903	7.70925	0.00549387	0.0139941	NW_005081574.1	1318641	1663542	+	3	Genome	Chr2
PDE7B	1509.55	0.136638	0.0321203	18.0894	2.10773e-05	8.43093e-05	NW_005081611.1	2097145	2266212	+	3	Genome	Chr2
PDSS2	435.116	0.240111	0.0532574	20.3213	6.54679e-06	2.88168e-05	NW_005081561.1	2400430	2528889	+	3	Genome	Chr2
PELI1	315.003	-0.369567	0.0815617	20.4153	6.233e-06	2.75509e-05	NW_005081615.1	1520687	1551172	-	3	Genome	Chr2
PEX13	346.978	-0.509891	0.0738246	47.5024	5.49374e-12	4.81618e-11	NW_005081577.1	3731883	3739248	+	3	Genome	Chr2
PGBD5	574.219	-0.51998	0.0469883	122.552	1.7473e-28	4.17764e-27	NW_005081653.1	771305	839360	-	3	Genome	Chr2
PGM3	201.312	-0.63598	0.120177	27.4869	1.58159e-07	8.66579e-07	NW_005081569.1	2549964	2558228	-	3	Genome	Chr2
PHACTR2	264.659	0.380224	0.0770735	24.2819	8.32194e-07	4.11018e-06	NW_005081632.1	793435	925088	-	3	Genome	Chr2
PHF10	1049.82	-0.104976	0.0365381	8.25143	0.00407199	0.0108175	NW_005081653.1	1613810	1637106	+	3	Genome	Chr2
PIGM	56.8891	-0.823727	0.179151	20.8064	5.08131e-06	2.2555e-05	NW_005081589.1	598078	600448	-	3	Genome	Chr2
PKIB	204.662	-0.487181	0.100745	23.1948	1.46392e-06	7.03218e-06	NW_005081591.1	3638669	3692922	-	3	Genome	Chr2
PLAGL1	194.96	-0.253617	0.094994	7.09173	0.00774407	0.0191238	NW_005081632.1	733586	760599	+	3	Genome	Chr2
PLCB1	1523.52	-0.257615	0.0337767	58.1309	2.45244e-14	2.68747e-13	NW_005081577.1	4723820	5028221	+	3	Genome	Chr2
PLCB4	1144.2	-0.439174	0.0406349	116.619	3.47909e-27	7.62501e-26	NW_005081577.1	5116242	5211246	+	3	Genome	Chr2
PLD5	430.748	-0.491928	0.0706549	48.2309	3.7887e-12	3.43596e-11	NW_005081620.1	1320972	1503301	-	3	Genome	Chr2
PLEKHG1	445.376	0.191473	0.0557037	11.8056	0.000590542	0.00188396	NW_005081596.1	1277335	1403237	+	3	Genome	Chr2
PLN	32.7556	1.0381	0.280983	12.8373	0.000339775	0.00116053	NW_005081697.1	388770	405213	+	3	Genome	Chr2
PM20D2	690.766	-0.734051	0.0440871	277.657	2.43263e-62	2.55912e-60	NW_005081569.1	4687362	4703770	+	3	Genome	Chr2
PNISR	638.398	-0.251163	0.0470423	28.4913	9.4119e-08	5.35206e-07	NW_005081553.1	8624523	8649938	-	3	Genome	Chr2
PNLDC1	26.2039	-0.738796	0.266746	7.45524	0.0063252	0.0159189	NW_005081596.1	596096	607458	-	3	Genome	Chr2
POLR1B	136.037	-0.789119	0.0982716	64.5983	9.18348e-16	1.15012e-14	NW_005081577.1	255139	266783	-	3	Genome	Chr2
PPIL4	378.203	-0.468462	0.0560324	69.9756	6.00429e-17	8.20327e-16	NW_005081589.1	347047	368961	-	3	Genome	Chr2
PPM1B	217.303	-0.498879	0.118708	17.376	3.06676e-05	0.000119934	NW_005081548.1	7404410	7440306	+	3	Genome	Chr2
PPP1CB	2181.19	-0.198399	0.0253047	61.4723	4.49017e-15	5.30749e-14	NW_005081548.1	9275712	9294688	-	3	Genome	Chr2
PPP1R14C	9.1467	4.41087	0.878511	17.5235	2.83772e-05	0.000111391	NW_005081596.1	1095094	1146048	+	3	Genome	Chr2
PPP1R21	187.196	-0.254434	0.0811163	9.83099	0.00171596	0.00490541	NW_005081662.1	490509	519285	+	3	Genome	Chr2
PPP2R5D	2370.09	-0.101828	0.0307	10.9953	0.000913451	0.00277731	NW_005081577.1	99454	127137	-	3	Genome	Chr2
PPP4R3B	277.444	-0.265847	0.0871518	9.25082	0.0023539	0.00660038	NW_005081577.1	1997598	2015269	-	3	Genome	Chr2
PQLC3	155.652	-1.65505	0.599512	5.32209	0.0210567	0.0466231	NW_005081582.1	145999	167768	-	3	Genome	Chr2
PREPL	170.291	-0.8712	0.114648	56.9731	4.41811e-14	4.6948e-13	NW_005081548.1	7454449	7481033	-	3	Genome	Chr2
PRIM2	26.2883	1.14808	0.283408	15.8068	7.0149e-05	0.000261691	NW_005081553.1	4245008	4333820	-	3	Genome	Chr2
PRKCE	1133.68	-0.256652	0.0451175	32.291	1.32726e-08	8.51387e-08	NW_005081548.1	8241902	8528158	+	3	Genome	Chr2
PRKN	73.6334	0.518545	0.149364	11.9379	0.000550026	0.00178039	NW_005081574.1	2831942	3509692	+	3	Genome	Chr2
PROKR1	97.3962	-1.24473	0.149294	68.2278	1.4566e-16	1.91543e-15	NW_005081615.1	3419645	3432995	-	3	Genome	Chr2
PRSS35	103.879	-0.350165	0.124489	7.86196	0.00504857	0.0129224	NW_005081569.1	2754317	2764045	+	3	Genome	Chr2
PTK7	250.857	-0.304409	0.0708055	18.4744	1.72204e-05	7.02166e-05	NW_005081602.1	36567	70738	+	3	Genome	Chr2
PYGB	2189.84	-0.270368	0.0403024	44.8908	2.08336e-11	1.7068e-10	NW_005081577.1	169769	187370	-	3	Genome	Chr2
QKI	598.95	-0.241407	0.0540656	19.9014	8.15403e-06	3.47289e-05	NW_005081574.1	2417678	2570741	-	3	Genome	Chr2
RAB23	638.454	-0.346663	0.0459144	56.9938	4.37189e-14	4.69309e-13	NW_005081569.1	4753464	4770201	+	3	Genome	Chr2
RAB3GAP2	959.085	-0.13325	0.0373822	12.7021	0.000365254	0.00124352	NW_005081548.1	425730	461726	+	3	Genome	Chr2
REL	11.1357	-2.02941	0.591074	9.64496	0.00189872	0.00541315	NW_005081577.1	3683147	3706950	+	3	Genome	Chr2
RGS17	394.872	-0.587866	0.0567265	107.528	3.41065e-25	7.03531e-24	NW_005081596.1	2405230	2444602	-	3	Genome	Chr2
RHOB	524.14	-0.161566	0.049081	10.8314	0.000997915	0.00300804	NW_005081561.1	6258292	6260682	-	3	Genome	Chr2
RIMS1	698.446	-0.163371	0.0462794	12.451	0.000417767	0.00139521	NW_005081654.1	239660	477462	+	3	Genome	Chr2
RIN2	240.58	0.201504	0.0871735	5.31888	0.0210956	0.0466231	NW_005081577.1	457275	522835	-	3	Genome	Chr2
RMDN2	143.116	0.659689	0.0994998	43.8939	3.46668e-11	2.80534e-10	NW_005081574.1	4799225	4849883	+	3	Genome	Chr2
RNASEH1	364.069	-0.769668	0.0648261	140.792	1.7867e-32	6.06325e-31	NW_005081582.1	3773052	3780144	+	3	Genome	Chr2
RNASET2	298.796	-0.233646	0.0822181	8.03608	0.00458547	0.0119109	NW_005081574.1	806047	828923	+	3	Genome	Chr2
RNF144A	1069.09	0.431675	0.0396951	118.149	1.60839e-27	3.60005e-26	NW_005081582.1	2381842	2444090	-	3	Genome	Chr2
RPS12	92.7433	-2.36106	0.184217	157.67	3.65298e-36	1.53717e-34	NW_005081729.1	907660	911630	+	3	Genome	Chr2
RPS27A	868.41	0.143769	0.0429503	11.1949	0.00082024	0.00250841	NW_005081577.1	1880165	1881392	+	3	Genome	Chr2
RRP36	687.999	-0.495435	0.0420709	138.843	4.7674e-32	1.51979e-30	NW_005081577.1	64393	71382	-	3	Genome	Chr2
RSAD2	34.9844	0.69353	0.243461	7.94268	0.00482823	0.0124188	NW_005081582.1	2445279	2453100	-	3	Genome	Chr2
RWDD1	392.44	-0.141501	0.0613508	5.31179	0.0211816	0.046715	NW_005081642.1	406939	417717	-	3	Genome	Chr2
RYR2	795.222	-0.127687	0.0508395	6.29567	0.0121033	0.0284848	NW_005081589.1	1901667	2284289	-	3	Genome	Chr2
SCCPDH	1491.45	0.108619	0.0289905	14.0373	0.000179216	0.00062845	NW_005081620.1	3170714	3181122	+	3	Genome	Chr2
SDCCAG8	111.417	0.643069	0.14325	19.8301	8.46374e-06	3.57584e-05	NW_005081620.1	1762446	1868980	+	3	Genome	Chr2
SERAC1	565.112	0.137003	0.0514795	7.0749	0.00781712	0.019259	NW_005081632.1	291472	316304	-	3	Genome	Chr2
SERINC1	11337.3	-0.273847	0.028876	89.7722	2.67228e-21	4.84697e-20	NW_005081591.1	3714900	3733027	+	3	Genome	Chr2
SESN1	206.059	-0.301282	0.0845426	12.6695	0.000371669	0.00125722	NW_005081561.1	1585705	1665010	+	3	Genome	Chr2
SF3B5	257.204	-0.225895	0.0760824	8.79782	0.0030159	0.00821951	NW_005081611.1	1944704	1945922	+	3	Genome	Chr2
SGK1	635.908	-0.151816	0.0466585	10.5801	0.00114313	0.00338752	NW_005081746.1	145372	215279	+	3	Genome	Chr2
SH3YL1	53.9915	-0.845015	0.176448	22.6709	1.92255e-06	8.98897e-06	NW_005081609.1	617157	662650	+	3	Genome	Chr2
SHLD1	10499.8	0.249712	0.090258	7.58776	0.00587659	0.0148968	NW_005081615.1	754300	788076	+	3	Genome	Chr2
SLC18B1	155.473	-0.366396	0.109662	11.08	0.000872638	0.00266091	NW_005081729.1	884761	901848	-	3	Genome	Chr2
SLC1A4	2359.69	-0.622994	0.0340736	332.887	2.25916e-74	2.97079e-72	NW_005081615.1	1859994	1893874	+	3	Genome	Chr2
SLC22A16	122.968	-0.639745	0.133641	22.6059	1.98873e-06	9.25729e-06	NW_005081561.1	1028636	1064285	+	3	Genome	Chr2
SLC22A3	59.0737	-0.661726	0.166818	15.5911	7.86248e-05	0.000292273	NW_005081596.1	435703	465151	-	3	Genome	Chr2
SLC24A3	1467.08	-0.20104	0.0449723	19.9354	8.01027e-06	3.42553e-05	NW_005081577.1	525405	616036	-	3	Genome	Chr2
SLC29A1	248.882	-0.42472	0.0709312	35.8533	2.12749e-09	1.45332e-08	NW_005081620.1	641427	675201	-	3	Genome	Chr2
SLC2A12	29.5717	-0.599136	0.220895	7.31838	0.00682528	0.0169745	NW_005081746.1	240314	271022	+	3	Genome	Chr2
SLC35A1	206.237	0.24826	0.0829534	8.93937	0.00279089	0.00767711	NW_005081569.1	4041396	4054543	+	3	Genome	Chr2
SLC35B2	108.118	-0.507269	0.107888	22.103	2.58408e-06	1.18194e-05	NW_005081620.1	624805	630419	+	3	Genome	Chr2
SLC35D3	199.026	-0.331575	0.0952862	12.048	0.000518491	0.00168349	NW_005081611.1	2615938	2621108	+	3	Genome	Chr2
SLC35F1	1178.93	-0.31416	0.0370268	71.9364	2.2225e-17	3.20284e-16	NW_005081697.1	75588	305235	+	3	Genome	Chr2
SLC3A1	67.1307	-0.59912	0.204906	8.2165	0.00415111	0.0109723	NW_005081548.1	7442257	7463043	+	3	Genome	Chr2
SLC4A1AP	164.613	-0.492059	0.0968969	25.6953	3.998e-07	2.05165e-06	NW_005081548.1	9881845	9897824	-	3	Genome	Chr2
SLC8A1	2468.88	0.0996091	0.0304729	10.6787	0.00108379	0.00323905	NW_005081615.1	337645	452272	-	3	Genome	Chr2
SMC6	2061.01	0.382447	0.0338675	127.306	1.5926e-29	4.08637e-28	NW_005081621.1	198452	244136	+	3	Genome	Chr2
SMIM26	132.375	0.241142	0.103332	5.42968	0.0197973	0.0443122	NW_005081602.1	4008828	4009316	+	3	Genome	Chr2
SMIM8	169.133	1.12562	0.138985	63.6105	1.51615e-15	1.85464e-14	NW_005081569.1	3993069	3996668	+	3	Genome	Chr2
SMOC2	49.4487	-0.598964	0.182908	10.5876	0.00113847	0.00338325	NW_005081844.1	93025	231237	-	3	Genome	Chr2
SMYD3	68.0685	0.370146	0.141733	6.79669	0.0091327	0.0222398	NW_005081620.1	2690069	3073244	-	3	Genome	Chr2
SNAP25	1464.09	-0.222326	0.0322986	47.3664	5.88825e-12	5.11937e-11	NW_005081577.1	5446107	5508866	+	3	Genome	Chr2
SNAP91	2390.93	-0.150281	0.0295125	25.9153	3.56732e-07	1.85783e-06	NW_005081569.1	2777069	2840434	-	3	Genome	Chr2
SNRPB2	198.474	-0.312746	0.0925825	11.3613	0.000749904	0.00232029	NW_005082187.1	4596	12604	-	3	Genome	Chr2
SNTG2	85.3233	1.54498	0.400659	12.3904	0.000431547	0.00143667	NW_005081582.1	4787189	4915546	-	3	Genome	Chr2
SNX14	494.494	-0.211557	0.0523751	16.3048	5.39261e-05	0.000204066	NW_005081569.1	3527783	3572840	-	3	Genome	Chr2
SNX5	160.066	0.445737	0.085604	27.1292	1.90304e-07	1.03731e-06	NW_005081602.1	3889224	3903741	-	3	Genome	Chr2
SOBP	406.241	-0.347453	0.0632036	30.162	3.97414e-08	2.32267e-07	NW_005081561.1	2286782	2400657	-	3	Genome	Chr2
SOCS5	382.891	-0.254803	0.0571443	19.8739	8.27213e-06	3.50899e-05	NW_005081548.1	8857764	8868905	+	3	Genome	Chr2
SPATA17	82.3342	-0.972853	0.148233	42.5747	6.80336e-11	5.2626e-10	NW_005081548.1	1359116	1445990	-	3	Genome	Chr2
SPRED2	428.963	-0.137965	0.0594507	5.3776	0.0203969	0.0454608	NW_005081615.1	1993967	2027852	-	3	Genome	Chr2
SPRTN	167.561	-0.267777	0.0978728	7.45537	0.00632473	0.0159189	NW_005081653.1	169766	175014	-	3	Genome	Chr2
SPTBN1	2007.32	0.20917	0.0474774	19.3434	1.09193e-05	4.54036e-05	NW_005081577.1	1575401	1686073	+	3	Genome	Chr2
SRBD1	105.434	0.651478	0.131192	24.4257	7.72308e-07	3.85056e-06	NW_005081548.1	8098943	8223451	-	3	Genome	Chr2
SRD5A2	82.7788	-0.520879	0.128423	16.4254	5.06031e-05	0.000192879	NW_005081699.1	1068367	1086859	+	3	Genome	Chr2
SRP9	564.828	-0.231529	0.0496907	21.6941	3.19772e-06	1.45e-05	NW_005081602.1	1276745	1282476	-	3	Genome	Chr2
STX11	5.54658	-3.3762	0.943669	9.92689	0.00162881	0.00469455	NW_005081611.1	1912172	1925004	-	3	Genome	Chr2
STXBP5	2232.23	-0.154928	0.0312945	24.4919	7.46213e-07	3.73817e-06	NW_005081611.1	569606	671885	-	3	Genome	Chr2
SUPT7L	408.461	0.163898	0.0667275	6.01696	0.014169	0.0326167	NW_005081548.1	9897957	9916175	+	3	Genome	Chr2
SYNDIG1	501.5	-0.215042	0.0564496	14.4892	0.000140969	0.00050442	NW_005081602.1	3631640	3684434	-	3	Genome	Chr2
SYNE1	2980.97	0.218517	0.0238761	83.7449	5.62928e-20	9.55162e-19	NW_005081596.1	1914129	2207876	-	3	Genome	Chr2
SYNJ2	743.473	0.225701	0.0402455	31.4514	2.04492e-08	1.28051e-07	NW_005081632.1	221184	291492	+	3	Genome	Chr2
TAF5L	483.805	-1.91218	0.0605946	1009.31	1.69919e-221	1.78754e-218	NW_005081653.1	530522	546109	-	3	Genome	Chr2
TARBP1	187.51	-0.264992	0.0976943	7.31879	0.00682374	0.0169745	NW_005081589.1	3264287	3296301	+	3	Genome	Chr2
TBCC	270.143	-0.286566	0.0768153	13.8831	0.000194537	0.00067766	NW_005081548.1	4946147	4948769	-	3	Genome	Chr2
TBPL1	115.526	-0.748556	0.121287	37.8291	7.72224e-10	5.48906e-09	NW_005081746.1	276352	290710	-	3	Genome	Chr2
TBXT	20.5549	-0.695597	0.282811	5.93399	0.0148516	0.033818	NW_005081574.1	1257637	1265694	+	3	Genome	Chr2
TCTE1	25.6573	2.08585	0.389082	26.0113	3.39422e-07	1.78536e-06	NW_005081620.1	567499	583297	+	3	Genome	Chr2
TDRD15	21.7345	0.867802	0.289922	8.74842	0.0030987	0.00842333	NW_005081561.1	5617869	5626482	-	3	Genome	Chr2
TDRP	353.635	0.221574	0.0874703	6.36576	0.0116344	0.0275661	NW_005081609.1	896951	924572	-	3	Genome	Chr2
TENT5A	429.986	-0.280314	0.0652301	18.4184	1.77339e-05	7.17539e-05	NW_005081569.1	2007751	2014021	-	3	Genome	Chr2
TGFB2	406.843	0.503308	0.0528049	91.0148	1.42602e-21	2.67887e-20	NW_005081548.1	1053944	1113953	-	3	Genome	Chr2
THADA	283.603	-0.260696	0.0855839	9.22642	0.00238548	0.00663896	NW_005081548.1	6935744	7087838	-	3	Genome	Chr2
TIAM2	482.812	-0.188325	0.0555171	11.4928	0.000698676	0.00218103	NW_005081596.1	3225316	3361785	+	3	Genome	Chr2
TJAP1	280.447	0.16374	0.0707183	5.35339	0.020682	0.0459019	NW_005081574.1	3825785	3865805	-	3	Genome	Chr2
TMEM151B	4850.69	-0.179819	0.0246435	53.2124	2.99362e-13	2.88926e-12	NW_005081620.1	579364	591779	-	3	Genome	Chr2
TMEM18	242.018	-1.00382	0.0917919	118.534	1.32437e-27	3.02879e-26	NW_005081609.1	410462	413193	+	3	Genome	Chr2
TMEM181	1952.22	0.272194	0.0344515	62.3413	2.88804e-15	3.45252e-14	NW_005081632.1	512091	534209	+	3	Genome	Chr2
TMEM200A	494.733	-0.424633	0.0521523	66.279	3.91416e-16	5.08358e-15	NW_005081591.1	115297	136574	-	3	Genome	Chr2
TMEM206	208.698	-0.327604	0.0790495	17.1575	3.4405e-05	0.000133557	NW_005081548.1	3734601	3753669	+	3	Genome	Chr2
TMEM30A	1849.77	0.165774	0.03541	21.8941	2.88121e-06	1.31213e-05	NW_005081654.1	1625628	1632656	-	3	Genome	Chr2
TMX4	1061.22	-0.671436	0.0406083	272.913	2.63073e-61	2.51593e-59	NW_005081577.1	4663759	4675633	-	3	Genome	Chr2
TNFRSF21	2666.4	-0.119705	0.0284393	17.7084	2.57484e-05	0.000101832	NW_005081561.1	2663536	2698639	-	3	Genome	Chr2
TOMM20	488.557	-0.238887	0.0626097	14.5163	0.00013895	0.000498893	NW_005081589.1	3013070	3017291	+	3	Genome	Chr2
TP53I3	1070.16	-0.129994	0.0383481	11.4843	0.00070188	0.00218455	NW_005081561.1	3729304	3736140	+	3	Genome	Chr2
TPBG	741.861	0.858116	0.0544723	246.662	1.38719e-55	1.21611e-53	NW_005081569.1	2243461	2250786	+	3	Genome	Chr2
TRAF3IP2	58.2057	-0.807536	0.173996	21.2968	3.93385e-06	1.75356e-05	NW_005081561.1	516055	549080	+	3	Genome	Chr2
TRAF5	114.008	0.353647	0.124791	7.96827	0.00476044	0.0122875	NW_005081548.1	4119359	4142453	-	3	Genome	Chr2
TRAPPC3L	84.1325	-2.25709	0.160654	198.871	3.68376e-45	2.2796e-43	NW_005081642.1	429188	446676	+	3	Genome	Chr2
TRIM67	347.59	-0.190097	0.0776984	5.95856	0.014646	0.0334221	NW_005081653.1	1111328	1151559	+	3	Genome	Chr2
TRNAS-AGA	96.9173	-0.734607	0.141442	26.621	2.47538e-07	1.34232e-06	NA	NA	NA	NA	NA	NA	NA
TSNAX	246.666	-0.295841	0.0872384	11.4434	0.000717486	0.00222653	NW_005081653.1	70648	94513	-	3	Genome	Chr2
TTBK1	836.116	-0.195984	0.040498	23.4099	1.30904e-06	6.31701e-06	NW_005081577.1	309162	398263	-	3	Genome	Chr2
TTC27	207.196	0.534095	0.107801	24.259	8.42121e-07	4.13977e-06	NW_005081574.1	4283989	4395882	-	3	Genome	Chr2
TTK	25.5622	-0.721866	0.283487	6.22462	0.0125986	0.0293874	NW_005081569.1	1266939	1295690	+	3	Genome	Chr2
TTL	708.452	-0.209276	0.0440965	22.5115	2.08886e-06	9.68055e-06	NW_005081577.1	269504	285297	-	3	Genome	Chr2
TULP4	1186.37	-0.198857	0.0349888	32.2912	1.32713e-08	8.51387e-08	NW_005081632.1	334163	480723	+	3	Genome	Chr2
UBE3D	32.358	-0.526296	0.228372	5.21451	0.0223992	0.0490911	NW_005081569.1	2407444	2485208	-	3	Genome	Chr2
UGP2	1095.63	-0.148478	0.0420163	12.4731	0.000412863	0.00138322	NW_005081615.1	1443550	1459315	+	3	Genome	Chr2
URB2	112.875	-0.339772	0.115855	8.56199	0.00343254	0.00923538	NW_005081653.1	550298	569557	+	3	Genome	Chr2
USH2A	356.611	-0.272924	0.064579	17.8323	2.41252e-05	9.61354e-05	NW_005081548.1	2099514	2476250	+	3	Genome	Chr2
UST	190.643	-0.731671	0.0902109	65.6182	5.47318e-16	6.9371e-15	NW_005081589.1	91739	188548	+	3	Genome	Chr2
UTP25	129.847	0.298797	0.13035	5.18541	0.0227774	0.0495078	NW_005081548.1	4718869	4735175	-	3	Genome	Chr2
UTRN	693.655	-0.262264	0.0546498	22.9699	1.64555e-06	7.76284e-06	NW_005081611.1	1538908	1884856	-	3	Genome	Chr2
VTA1	630.489	0.691217	0.0447561	239.068	6.27946e-54	4.71857e-52	NW_005081632.1	1512443	1551579	-	3	Genome	Chr2
WDR27	48.6695	-1.01411	0.224674	19.5699	9.6983e-06	4.06478e-05	NW_005081653.1	1648459	1738823	+	3	Genome	Chr2
WDR35	264.952	-0.211854	0.0780523	7.34674	0.00671847	0.0167882	NW_005081561.1	6586970	6630001	+	3	Genome	Chr2
WDR92	85.4423	-0.808554	0.128507	39.5354	3.2217e-10	2.38678e-09	NW_005081615.1	3278980	3286065	-	3	Genome	Chr2
XDH	51.4263	-0.56799	0.190726	8.70256	0.00317763	0.00857146	NW_005081602.1	419911	529346	-	3	Genome	Chr2
XPO1	583.601	0.181704	0.0551226	10.8474	0.00098932	0.0029907	NW_005081577.1	3939745	3970208	-	3	Genome	Chr2
XRN2	445.115	0.282855	0.056303	25.2141	5.13048e-07	2.60737e-06	NW_005081577.1	962245	995189	+	3	Genome	Chr2
YPEL5	6012.47	0.0565337	0.0245373	5.30665	0.0212442	0.046755	NW_005081742.1	301560	313956	-	3	Genome	Chr2
ZBTB24	171.425	-0.517526	0.0979057	27.8307	1.32407e-07	7.36996e-07	NW_005081561.1	1435631	1456419	+	3	Genome	Chr2
ZFAND3	519.819	-0.297405	0.051234	33.6783	6.50236e-09	4.2753e-08	NW_005081548.1	11862466	11910441	-	3	Genome	Chr2
ZUP1	128.387	-0.409032	0.0960179	18.1524	2.03917e-05	8.21918e-05	NW_005081642.1	395447	406175	+	3	Genome	Chr2

## Sheet: Males_AMV_2vs2m
gene_name	baseMean	log2FoldChange	lfcSE	stat	pvalue	padj	CHROM	Start	End	Strand	Zfinch_Chromosome	ZAL3	ZAL2
AARS2	295.398	-1.29788	0.0775651	279.521	9.54756e-63	9.98675e-61	NW_005081620.1	536276	552865	+	3	Genome	Chr2
ABCB10	70.6724	-1.02726	0.151376	45.7915	1.31531e-11	1.09192e-10	NW_005081653.1	498650	521597	-	3	Genome	Chr2
ABRACL	175.093	-0.28834	0.0882147	10.6631	0.00109297	0.00309822	NW_005081611.1	3493811	3498792	+	3	Genome	Chr2
ACAT2	296.565	-0.418047	0.092248	20.3686	6.38689e-06	2.60964e-05	NW_005081596.1	621378	630224	-	3	Genome	Chr2
ACSS1	11.5658	1.26773	0.412819	9.12333	0.0025237	0.00663264	NW_005081577.1	414432	447854	+	3	Genome	Chr2
ACTN2	7.08043	-1.79152	0.72187	5.24311	0.0220338	0.0455482	NW_005081589.1	2380882	2462749	-	3	Genome	Chr2
ACTR2	3312.71	-0.401244	0.0311705	165.317	7.79787e-38	3.39857e-36	NW_005081615.1	1948869	1971862	+	3	Genome	Chr2
ADAM17	255.938	-0.302409	0.0743816	16.5077	4.8454e-05	0.00017392	NW_005081582.1	1212145	1246792	+	3	Genome	Chr2
ADAT2	67.2565	-0.598645	0.149761	15.867	6.79526e-05	0.000233044	NW_005081632.1	960691	970183	+	3	Genome	Chr2
ADI1	472.072	-1.15671	0.070501	266.323	7.18197e-60	6.26029e-58	NW_005081582.1	3781916	3787434	+	3	Genome	Chr2
ADSS	536.117	-0.450842	0.0508235	78.6886	7.27136e-19	1.19058e-17	NW_005081620.1	2212055	2249058	-	3	Genome	Chr2
AFDN	504.926	-0.206248	0.0589415	12.2228	0.000472083	0.0014313	NW_005081574.1	354953	435976	-	3	Genome	Chr2
AFG1L	314.97	-0.26443	0.0689264	14.6962	0.000126298	0.000415432	NW_005081561.1	1921293	1979202	-	3	Genome	Chr2
AFTPH	452.413	-0.264437	0.0699005	14.258	0.000159386	0.000514561	NW_005081615.1	1670171	1712307	+	3	Genome	Chr2
AGPAT5	1586.97	-0.147643	0.0306985	23.1267	1.51671e-06	6.77984e-06	NW_005081876.1	117210	171658	+	3	Genome	Chr2
AGT	20326.4	-0.505907	0.0411249	150.339	1.46173e-34	5.46061e-33	NW_005081653.1	922303	933218	-	3	Genome	Chr2
AHSA2P	474.056	-0.276955	0.0680478	16.5039	4.85513e-05	0.00017392	NW_005081577.1	3802749	3812702	+	3	Genome	Chr2
AIG1	400.038	-0.269053	0.0758669	12.5167	0.000403334	0.00123005	NW_005081632.1	1000560	1088013	-	3	Genome	Chr2
AKAP12	457.952	-0.465666	0.0708558	42.9771	5.53849e-11	4.22866e-10	NW_005081596.1	1597993	1614727	+	3	Genome	Chr2
AKT3	1806.96	-0.185485	0.028286	42.998	5.47953e-11	4.2144e-10	NW_005081620.1	1871641	2006775	-	3	Genome	Chr2
ALK	236.194	-0.175738	0.0704747	6.21633	0.0126577	0.0281701	NW_005081742.1	404906	709885	+	3	Genome	Chr2
ALKAL2	167.82	-1.14583	0.119847	89.8732	2.53928e-21	5.10785e-20	NW_005081609.1	581075	594005	+	3	Genome	Chr2
AMD1	2651.46	0.157121	0.0300632	27.2991	1.74289e-07	9.02505e-07	NW_005081561.1	826729	844066	-	3	Genome	Chr2
ANGPT2	1175.39	0.324676	0.0491312	43.5392	4.15557e-11	3.26822e-10	NW_005081876.1	10246	53733	-	3	Genome	Chr2
APLF	34.2453	-2.01107	0.248969	64.5294	9.51031e-16	1.15672e-14	NW_005081615.1	3400348	3421032	+	3	Genome	Chr2
ARFGEF3	1683.72	0.105679	0.038466	7.54012	0.00603401	0.0145428	NW_005081611.1	3077584	3173617	+	3	Genome	Chr2
ARID1B	300.919	-0.270261	0.0646809	17.4521	2.94635e-05	0.000108901	NW_005081596.1	3963850	4255992	+	3	Genome	Chr2
ARMT1	827.545	-0.212625	0.045735	21.5935	3.36985e-06	1.42132e-05	NW_005081596.1	1668105	1676653	+	3	Genome	Chr2
ATP6V1C2	27.9891	-1.60586	0.400079	14.7559	0.000122364	0.000403763	NW_005081582.1	431766	454886	-	3	Genome	Chr2
B3GALNT2	303.301	0.324449	0.0705385	21.1247	4.30342e-06	1.78626e-05	NW_005081589.1	2839206	2858355	+	3	Genome	Chr2
B3GAT2	573.936	0.652963	0.0584443	124.418	6.82432e-29	1.87848e-27	NW_005081553.1	142485	161736	+	3	Genome	Chr2
BABAM2	1125.17	-0.18442	0.0438581	17.657	2.64535e-05	9.95338e-05	NW_005081548.1	9488969	9653305	-	3	Genome	Chr2
BACH2	77.5187	-0.319387	0.136534	5.44436	0.0196316	0.0409056	NW_005081553.1	4676987	4817522	-	3	Genome	Chr2
BAG2	97.1541	0.893977	0.147904	35.9376	2.03735e-09	1.34878e-08	NW_005081569.1	4770633	4776412	-	3	Genome	Chr2
BCKDHB	139.527	-0.444198	0.0985271	20.2934	6.6429e-06	2.67619e-05	NW_005081569.1	1345044	1455354	+	3	Genome	Chr2
BEND6	264.673	-0.403295	0.0977648	16.8711	4.00062e-05	0.000145807	NW_005081569.1	4823934	4846725	-	3	Genome	Chr2
BICRAL	282.482	-0.251709	0.0796331	9.95819	0.00160135	0.00437341	NW_005081548.1	4948887	4994562	+	3	Genome	Chr2
BIRC6	776.008	0.119157	0.0452089	6.94193	0.00841981	0.0198093	NW_005081574.1	4423628	4601123	-	3	Genome	Chr2
BORCS6	339.114	0.210718	0.0627382	11.2725	0.000786644	0.00229201	NW_005081569.1	4656371	4659517	-	3	Genome	Chr2
BPNT1	160.614	0.29693	0.090655	10.7125	0.00106414	0.0030247	NW_005081548.1	491857	500068	+	3	Genome	Chr2
BROX	672.256	0.237295	0.0526371	20.2908	6.6521e-06	2.67619e-05	NW_005081821.1	310511	327948	-	3	Genome	Chr2
BTBD3	2000.57	0.531344	0.048606	118.737	1.19608e-27	3.12775e-26	NW_005081602.1	3423342	3434195	-	3	Genome	Chr2
C1D	218.965	-0.873389	0.0845097	106.699	5.18179e-25	1.17829e-23	NW_005081615.1	3254190	3268208	-	3	Genome	Chr2
CALM2	9633.29	-0.221123	0.0371762	35.2964	2.8315e-09	1.82824e-08	NW_005081548.1	9193679	9202322	-	3	Genome	Chr2
CAMKMT	54.3452	0.499938	0.164372	9.1795	0.00244741	0.00646463	NW_005081548.1	7486988	7690789	+	3	Genome	Chr2
CAPN11	583.152	0.444396	0.0494579	80.7242	2.59528e-19	4.52444e-18	NW_005081620.1	702426	715405	-	3	Genome	Chr2
CAPN2	43.4284	-1.50227	0.206754	52.2479	4.8918e-13	4.78208e-12	NW_005081602.1	1762981	1787039	-	3	Genome	Chr2
CCDC167	123.546	0.624076	0.132715	21.8137	3.00444e-06	1.28797e-05	NW_005081620.1	480360	493512	+	3	Genome	Chr2
CCN2	244.93	-1.62079	0.187521	69.9766	6.00133e-17	8.8414e-16	NW_005081729.1	518681	520790	-	3	Genome	Chr2
CCR6	21.6823	1.27721	0.376604	10.4608	0.00121933	0.00341937	NW_005081574.1	753056	765468	-	3	Genome	Chr2
CCT4	646.492	-0.127733	0.0505967	6.36621	0.0116314	0.0261082	NW_005081577.1	4037880	4043197	-	3	Genome	Chr2
CD109	246.857	2.14691	0.137579	229.131	9.22244e-52	5.67451e-50	NW_005081654.1	977479	1047341	+	3	Genome	Chr2
CD164	729.758	-0.251825	0.0507478	24.5885	7.09748e-07	3.37453e-06	NW_005081561.1	1463258	1471520	+	3	Genome	Chr2
CDC40	442.701	-0.200422	0.0694228	8.30524	0.00395308	0.00996368	NW_005081561.1	1146994	1175121	-	3	Genome	Chr2
CDC42BPA	1244.14	-0.214499	0.0396881	29.1832	6.58479e-08	3.68326e-07	NW_005081602.1	529240	712881	+	3	Genome	Chr2
CDC42EP3	208.561	-0.333977	0.0844002	15.6217	7.73623e-05	0.00026273	NW_005081574.1	4710595	4737195	-	3	Genome	Chr2
CEBPZ	717.566	-1.09042	0.0549093	391.638	3.64102e-87	9.52127e-85	NW_005081699.1	828737	843152	-	3	Genome	Chr2
CENPF	76.8927	2.42172	0.181712	177.291	1.89214e-40	9.42464e-39	NW_005081548.1	2767537	2801628	-	3	Genome	Chr2
CENPW	106.022	-0.606263	0.115106	27.6946	1.42058e-07	7.5047e-07	NW_005081591.1	1964183	1974671	-	3	Genome	Chr2
CEP162	187.978	-0.389077	0.113541	11.6126	0.00065507	0.0019356	NW_005081569.1	2968920	3013377	-	3	Genome	Chr2
CEP57L1	16.7203	3.38171	0.60622	23.5488	1.21787e-06	5.61186e-06	NW_005081561.1	1561326	1585093	-	3	Genome	Chr2
CEP68	118.946	0.302559	0.121945	6.10731	0.0134624	0.029771	NW_005081615.1	1900165	1908151	+	3	Genome	Chr2
CEP85L	444.174	0.192577	0.0558554	11.8787	0.00056779	0.00169205	NW_005081697.1	340991	481120	-	3	Genome	Chr2
CFAP36	117.606	0.400325	0.12831	9.64005	0.0019038	0.0051192	NW_005081577.1	1990044	1996433	+	3	Genome	Chr2
CFAP61	24.1307	-1.76631	0.660255	5.34444	0.0207884	0.0430588	NW_005081577.1	671217	753647	+	3	Genome	Chr2
CHRM3	435.883	-0.234358	0.0584464	16.0679	6.11103e-05	0.000213071	NW_005081589.1	1108081	1304818	-	3	Genome	Chr2
CLDN20	36.5786	0.942816	0.247285	14.0403	0.000178938	0.000572382	NW_005081596.1	3368843	3374482	+	3	Genome	Chr2
CLIP4	645.578	-0.128329	0.0452805	8.02939	0.00460243	0.0113809	NW_005081742.1	712854	745107	-	3	Genome	Chr2
CLVS2	3188.13	0.143273	0.0350167	16.7204	4.33123e-05	0.000157308	NW_005081591.1	3485978	3542268	-	3	Genome	Chr2
CMPK2	29.4759	-6.14141	1.01902	22.3228	2.30459e-06	1.00025e-05	NW_005081582.1	2460384	2467571	+	3	Genome	Chr2
CNKSR3	163.304	-0.819675	0.107943	57.2296	3.87782e-14	4.09718e-13	NW_005081596.1	2933689	2988450	-	3	Genome	Chr2
CNR1	6237.72	-0.105255	0.0365979	8.25857	0.00405601	0.0101497	NW_005081569.1	4312018	4330605	-	3	Genome	Chr2
CNRIP1	930.394	-0.302485	0.0424442	50.7439	1.05241e-12	9.82871e-12	NW_005081615.1	3355161	3366270	-	3	Genome	Chr2
CNST	458.726	0.506336	0.0636445	63.1111	1.95374e-15	2.32229e-14	NW_005081620.1	3091761	3144565	+	3	Genome	Chr2
COG2	434.363	-0.559499	0.0674304	68.5724	1.22304e-16	1.69007e-15	NW_005081653.1	891790	922678	+	3	Genome	Chr2
COL12A1	161.208	0.746184	0.135173	29.822	4.7359e-08	2.69225e-07	NW_005081654.1	1505224	1605015	-	3	Genome	Chr2
COL19A1	86.0101	-0.751723	0.143782	27.0632	1.96907e-07	1.00963e-06	NW_005081553.1	489719	668466	-	3	Genome	Chr2
COQ3	41.0173	-0.797767	0.17615	20.5089	5.93554e-06	2.43474e-05	NW_005081553.1	8613142	8619725	-	3	Genome	Chr2
COQ8A	338.212	-0.884474	0.0782958	126.748	2.10904e-29	5.96231e-28	NW_005081602.1	715342	758552	-	3	Genome	Chr2
CPSF3	92.1438	-0.534893	0.167357	9.9597	0.00160004	0.00437341	NW_005081582.1	1254877	1273884	-	3	Genome	Chr2
CRLS1	1169.95	-0.35911	0.0518569	47.7725	4.78652e-12	4.21481e-11	NW_005081615.1	837783	843224	+	3	Genome	Chr2
CSMD1	540.571	-0.207562	0.070272	8.68459	0.00320911	0.00820716	NW_005081609.1	2431647	3287877	-	3	Genome	Chr2
CUNH1orf131	150.843	0.37107	0.111984	10.9018	0.000960693	0.00276828	NW_005081653.1	1151164	1159898	-	3	Genome	Chr2
DAAM2	854.202	-0.149894	0.0528991	8.01172	0.00464756	0.0114385	NW_005081548.1	10883558	11087629	-	3	Genome	Chr2
DCBLD1	137.818	-0.747915	0.103925	51.6984	6.4717e-13	6.154e-12	NW_005081642.1	56325	102509	-	3	Genome	Chr2
DEGS1	350.633	-0.368888	0.0616442	35.8037	2.18239e-09	1.43571e-08	NW_005081602.1	1671835	1676655	-	3	Genome	Chr2
DESI2	227.577	0.226949	0.096279	5.52164	0.0187826	0.0392147	NW_005081620.1	2270590	2285383	+	3	Genome	Chr2
DHX57	292.104	-0.375399	0.0751813	24.8663	6.14464e-07	2.9756e-06	NW_005081615.1	166623	182355	+	3	Genome	Chr2
DISC1	120.771	-1.17841	0.140784	68.5645	1.22797e-16	1.69007e-15	NW_005081589.1	4313836	4447333	-	3	Genome	Chr2
DLGAP2	1276.32	-0.102225	0.0416428	6.01947	0.0141489	0.0309618	NW_005081609.1	1061212	1514790	+	3	Genome	Chr2
DSE	32.1656	-0.915062	0.240341	14.1383	0.000169851	0.000546659	NW_005081642.1	465282	499532	-	3	Genome	Chr2
DSTN	1898.01	-0.102597	0.0296488	11.9715	0.000540194	0.00163144	NW_005081602.1	3811751	3823176	+	3	Genome	Chr2
DTD1	384.344	-0.371545	0.0618706	36.02	1.95304e-09	1.30119e-08	NW_005081602.1	4010290	4024101	+	3	Genome	Chr2
DTL	15.291	1.23736	0.330167	13.8328	0.000199819	0.00063529	NW_005081548.1	3837600	3861707	-	3	Genome	Chr2
DUSP10	182.095	0.240789	0.089462	7.22698	0.0071816	0.0170339	NW_005081832.1	232012	255845	+	3	Genome	Chr2
E2F6	986.662	-0.322603	0.0500524	41.4349	1.2186e-10	9.04013e-10	NW_005081582.1	24475	46577	+	3	Genome	Chr2
EDARADD	57.7255	0.651992	0.146655	19.7654	8.75534e-06	3.44289e-05	NW_005081589.1	2521104	2534395	-	3	Genome	Chr2
EEF1A1	7654.97	0.188716	0.0248351	57.6955	3.05996e-14	3.26604e-13	NW_005081654.1	913826	918554	-	3	Genome	Chr2
EGLN1	567.226	-0.152983	0.0477544	10.2597	0.00135967	0.00377247	NW_005081653.1	150849	159318	+	3	Genome	Chr2
EHBP1	399.361	0.153795	0.062308	6.08349	0.0136451	0.0301114	NW_005081615.1	1034124	1232305	+	3	Genome	Chr2
EHD3	3606.15	-0.46419	0.027125	292.218	1.63407e-65	2.13655e-63	NW_005081602.1	363343	392669	+	3	Genome	Chr2
EIPR1	421.777	-0.520145	0.0761365	46.3711	9.78495e-12	8.25408e-11	NW_005081582.1	3847478	3921229	+	3	Genome	Chr2
ELOVL4	479.904	-0.232243	0.0674536	11.8136	0.000587988	0.00174726	NW_005081569.1	1192178	1229931	-	3	Genome	Chr2
ELOVL5	522.412	-0.146688	0.0575036	6.49734	0.0108036	0.0244602	NW_005081569.1	6274528	6291081	+	3	Genome	Chr2
EML4	227.237	-0.336913	0.0769043	19.1734	1.19366e-05	4.65885e-05	NW_005081548.1	5495348	5642673	+	3	Genome	Chr2
EML6	219.105	-0.22372	0.0787314	8.06311	0.00451756	0.0111976	NW_005081577.1	1693414	1785269	+	3	Genome	Chr2
ENAH	456.295	0.161462	0.0561237	8.26966	0.00403132	0.0101121	NW_005081602.1	1317124	1409083	+	3	Genome	Chr2
ENPP1	129.419	0.364109	0.122856	8.70917	0.00316613	0.00811708	NW_005081729.1	447988	500728	+	3	Genome	Chr2
ENTPD6	935.563	0.449459	0.0449712	99.7024	1.77104e-23	3.85938e-22	NW_005081577.1	187563	200778	-	3	Genome	Chr2
EPAS1	3052.2	0.222292	0.0288367	59.3788	1.30062e-14	1.46285e-13	NW_005081548.1	8618158	8658591	+	3	Genome	Chr2
EPHA7	111.623	-0.510393	0.135168	14.0822	0.00017499	0.000561472	NW_005081553.1	6061424	6224456	-	3	Genome	Chr2
EPHX1	5.86516	-2.08265	0.773903	5.68278	0.0171322	0.0366469	NW_005081602.1	1242305	1256155	-	3	Genome	Chr2
EPM2A	274.599	1.0506	0.0788954	176.882	2.3235e-40	1.10472e-38	NW_005081611.1	1301773	1330662	+	3	Genome	Chr2
EPRS	952.367	-0.139756	0.0393307	12.6214	0.000381361	0.00116981	NW_005081548.1	503298	540756	+	3	Genome	Chr2
ERO1B	405.055	-0.384215	0.069334	30.6026	3.16674e-08	1.85051e-07	NW_005081589.1	2551503	2575957	+	3	Genome	Chr2
ESR1	161.863	0.621738	0.0928335	44.8345	2.14406e-11	1.71198e-10	NW_005081596.1	1727842	1914363	+	3	Genome	Chr2
ESRRG	264.556	-0.370138	0.0743343	24.7574	6.50195e-07	3.11974e-06	NW_005081548.1	1709670	2071828	+	3	Genome	Chr2
EZR	232.567	0.602684	0.0943639	40.5092	1.95694e-10	1.38308e-09	NW_005081632.1	578970	616155	-	3	Genome	Chr2
FABP7	2192.82	0.133305	0.0509204	6.83043	0.00896177	0.0208311	NW_005081591.1	3623179	3626632	-	3	Genome	Chr2
FAM184A	152.749	0.349518	0.101171	11.8899	0.000564402	0.00168676	NW_005081697.1	570764	643859	-	3	Genome	Chr2
FAM49A	3226.14	-0.0721679	0.0290822	6.15506	0.0131037	0.0290391	NW_005081621.1	783325	823427	+	3	Genome	Chr2
FAM84A	284.605	-0.720277	0.0693991	107.863	2.87958e-25	7.00474e-24	NW_005081621.1	1868925	1878499	-	3	Genome	Chr2
FAM89A	565.913	-0.42024	0.0548271	58.6529	1.88091e-14	2.04941e-13	NW_005081653.1	1077641	1079637	-	3	Genome	Chr2
FAM98A	605.194	0.117496	0.0506717	5.37182	0.0204646	0.0424722	NW_005081574.1	3947952	3965007	+	3	Genome	Chr2
FBXL4	139.782	0.576287	0.130346	19.2584	1.14164e-05	4.4725e-05	NW_005081553.1	8378522	8435086	-	3	Genome	Chr2
FBXO30	248.041	-0.462293	0.0831522	30.8033	2.85555e-08	1.67804e-07	NW_005081611.1	1262752	1280105	+	3	Genome	Chr2
FBXO9	1540.6	-0.139545	0.0410174	11.5591	0.000674186	0.00198647	NW_005081569.1	6332159	6351151	-	3	Genome	Chr2
FEZ2	1600.37	-0.263521	0.0590954	19.7745	8.71384e-06	3.4395e-05	NW_005081574.1	5232614	5257112	-	3	Genome	Chr2
FGFR1OP	311.192	-0.494766	0.0716688	47.5605	5.33321e-12	4.64878e-11	NW_005081574.1	777519	801004	-	3	Genome	Chr2
FIG4	188.374	-0.852489	0.0926551	84.4306	3.97939e-20	7.43292e-19	NW_005081561.1	1317339	1372551	-	3	Genome	Chr2
FLRT3	384.083	-0.195481	0.0676631	8.3261	0.00390795	0.0098737	NW_005081602.1	2733443	2745848	+	3	Genome	Chr2
FLVCR1	356.09	-0.27394	0.0638915	18.3627	1.82599e-05	7.02201e-05	NW_005081548.1	3563183	3578397	-	3	Genome	Chr2
FMN2	301.412	-0.237047	0.0616956	14.7642	0.00012183	0.000403271	NW_005081589.1	920023	1071952	-	3	Genome	Chr2
FNDC1	55.7141	1.42141	0.25289	29.3691	5.98226e-08	3.36422e-07	NW_005081596.1	819771	882154	-	3	Genome	Chr2
FOSL2	1442.2	0.124955	0.0424625	8.64773	0.00327469	0.00835445	NW_005081548.1	9442825	9453965	-	3	Genome	Chr2
FOXO3	503.485	-0.231545	0.0586391	15.5667	7.96442e-05	0.000268735	NW_005081561.1	1808903	1824873	-	3	Genome	Chr2
FUCA2	138.59	-0.593859	0.121583	23.5925	1.19052e-06	5.51012e-06	NW_005081632.1	926890	938315	+	3	Genome	Chr2
FUT9	53.4851	0.464291	0.150493	9.52867	0.00202286	0.00541154	NW_005081553.1	7094029	7190355	+	3	Genome	Chr2
GALNT2	386.434	-0.148546	0.0574791	6.67567	0.00977379	0.0223218	NW_005081653.1	662560	757284	+	3	Genome	Chr2
GCLC	814.385	0.169841	0.0395371	18.4522	1.74218e-05	6.72444e-05	NW_005081569.1	6185374	6222082	+	3	Genome	Chr2
GEMIN6	104.113	0.309271	0.119037	6.72101	0.00952836	0.0218567	NW_005081615.1	191187	196002	-	3	Genome	Chr2
GFRAL	31.5554	-0.892039	0.308031	7.69751	0.00552972	0.0134201	NW_005081569.1	5529844	5553595	-	3	Genome	Chr2
GGPS1	802.796	0.244718	0.041155	35.3524	2.75131e-09	1.7875e-08	NW_005081589.1	2886477	2909836	-	3	Genome	Chr2
GLO1	1026.15	-0.805478	0.0418646	369.454	2.46105e-82	4.29042e-80	NW_005081548.1	11696849	11704220	+	3	Genome	Chr2
GLP1R	17.3099	-1.04264	0.363257	7.68245	0.00557605	0.0134701	NW_005081548.1	11484788	11568286	-	3	Genome	Chr2
GNPAT	828.081	-0.359333	0.0470266	58.2961	2.25495e-14	2.43163e-13	NW_005081653.1	1159608	1179847	+	3	Genome	Chr2
GPATCH11	468.026	0.414444	0.0587056	49.7735	1.72562e-12	1.58333e-11	NW_005081574.1	4966422	4981314	-	3	Genome	Chr2
GPATCH2	398.712	-0.334626	0.0635692	27.6616	1.44501e-07	7.5574e-07	NW_005081548.1	1446164	1566114	+	3	Genome	Chr2
GPCPD1	632.865	0.190081	0.0445737	18.1826	2.00706e-05	7.66199e-05	NW_005081615.1	684157	726204	-	3	Genome	Chr2
GPR137B	425.862	-0.15165	0.0599505	6.39121	0.0114687	0.0258539	NW_005081589.1	2577960	2603322	-	3	Genome	Chr2
GPR6	153.239	0.348137	0.114811	9.11677	0.00253277	0.00663979	NW_005081561.1	1295783	1296796	-	3	Genome	Chr2
GREB1	12.6368	4.22458	1.21227	5.67449	0.0172133	0.0367451	NW_005081621.1	3100814	3165186	-	3	Genome	Chr2
GREM2	224.273	-0.22868	0.074325	9.46095	0.00209893	0.00558645	NW_005081589.1	874719	915580	+	3	Genome	Chr2
GRHL1	26.9435	-2.37086	0.27958	73.1469	1.20352e-17	1.8513e-16	NW_005081582.1	946849	987206	-	3	Genome	Chr2
GRM1	147.085	-0.744366	0.108817	46.5432	8.96219e-12	7.6215e-11	NW_005081611.1	974929	1160117	-	3	Genome	Chr2
GTF2H5	650.291	-0.451823	0.0462839	95.2913	1.64332e-22	3.43782e-21	NW_005081632.1	316356	321195	+	3	Genome	Chr2
HAO1	61.4282	0.632316	0.139258	20.6465	5.52379e-06	2.28375e-05	NW_005081577.1	4637903	4663658	-	3	Genome	Chr2
HBS1L	185.918	-0.397743	0.0963777	16.9522	3.83325e-05	0.000140195	NW_005081596.1	157125	216143	-	3	Genome	Chr2
HCRTR2	22.6535	-1.02068	0.300633	11.0248	0.000898991	0.00260483	NW_005081569.1	5560141	5594237	-	3	Genome	Chr2
HDAC2	169.585	-0.397498	0.0830282	22.9283	1.6816e-06	7.48489e-06	NW_005081642.1	1462469	1479152	+	3	Genome	Chr2
HEATR1	121.826	-0.311047	0.0975594	10.1623	0.00143345	0.00395618	NW_005081589.1	2462853	2497711	+	3	Genome	Chr2
HINT3	375.792	-0.450177	0.0550893	66.8786	2.88749e-16	3.82318e-15	NW_005081591.1	2124662	2131554	-	3	Genome	Chr2
HIVEP2	826.912	-0.100331	0.0422188	5.64487	0.0175065	0.0372083	NW_005081632.1	1180935	1285717	+	3	Genome	Chr2
HMGCLL1	428.176	-0.355426	0.0622846	32.5037	1.18964e-08	7.15149e-08	NW_005081569.1	5472658	5524810	+	3	Genome	Chr2
HNRNPU	1801.35	-0.288125	0.0327037	77.5603	1.28729e-18	2.07155e-17	NW_005081620.1	2315380	2330008	-	3	Genome	Chr2
HSP90AB1	2459.3	-0.433453	0.0417987	107.089	4.25531e-25	1.0116e-23	NW_005081620.1	632318	639160	-	3	Genome	Chr2
HTR1B	336.337	-0.176218	0.0771909	5.19271	0.0226819	0.0466115	NW_005081569.1	377554	381286	-	3	Genome	Chr2
IAH1	147.382	-0.419157	0.0980864	18.2213	1.9667e-05	7.53541e-05	NW_005081582.1	1248450	1254324	-	3	Genome	Chr2
IARS2	661.992	0.352985	0.0515545	46.8141	7.80504e-12	6.74717e-11	NW_005081548.1	461922	487724	-	3	Genome	Chr2
IFNGR1	749.851	-0.368871	0.0593765	38.4392	5.64855e-10	3.81186e-09	NW_005081611.1	2709193	2731480	-	3	Genome	Chr2
IGF2R	699.472	0.28472	0.0424252	45.0466	1.92404e-11	1.54859e-10	NW_005081596.1	504656	560828	-	3	Genome	Chr2
INTS7	183.313	-0.279624	0.0888793	9.87548	0.00167496	0.00455067	NW_005081548.1	3862035	3887398	+	3	Genome	Chr2
IRAK1BP1	127.121	0.718727	0.142922	24.7952	6.37567e-07	3.07325e-06	NW_005081569.1	835037	856669	+	3	Genome	Chr2
KBTBD11	3823.68	0.106682	0.0301436	12.5166	0.000403354	0.00123005	NW_005081609.1	1677696	1700707	+	3	Genome	Chr2
KCNF1	56.8049	0.510518	0.164761	9.51851	0.0020341	0.00542771	NW_005081582.1	331424	333991	-	3	Genome	Chr2
KCNG3	125.95	-0.461677	0.121608	14.2933	0.000156418	0.000508115	NW_005081548.1	5821589	5836527	-	3	Genome	Chr2
KCNH1	113.238	-0.261444	0.106443	6.02319	0.0141191	0.0309615	NW_005081548.1	4197878	4370446	+	3	Genome	Chr2
KCNK1	321.872	-0.308163	0.0738923	17.3434	3.11977e-05	0.000114904	NW_005081589.1	3526300	3559457	-	3	Genome	Chr2
KCNK12	649.746	0.765576	0.0468471	267.747	3.51441e-60	3.34189e-58	NW_005081662.1	137933	150530	-	3	Genome	Chr2
KCNK5	107.289	-1.88354	0.206568	76.9833	1.72406e-18	2.73238e-17	NW_005081548.1	11381424	11416202	+	3	Genome	Chr2
KCNQ5	897.248	-0.494045	0.0419809	138.411	5.92499e-32	1.93673e-30	NW_005081654.1	589746	866865	+	3	Genome	Chr2
KIDINS220	1088.31	-0.187292	0.0412905	20.5562	5.79052e-06	2.3846e-05	NW_005081582.1	1535069	1602871	+	3	Genome	Chr2
KIF16B	132.187	-0.440016	0.0981548	20.0837	7.41267e-06	2.94816e-05	NW_005081602.1	1824279	1948092	+	3	Genome	Chr2
KIF25	170.966	0.734959	0.141574	26.247	3.00424e-07	1.50356e-06	NW_005081574.1	309193	350508	-	3	Genome	Chr2
KLC4	1590.3	-0.166634	0.032275	26.6472	2.442e-07	1.23398e-06	NW_005081602.1	15797	29803	+	3	Genome	Chr2
KLHL32	64.1024	-0.551939	0.158797	11.968	0.000541213	0.00163144	NW_005081553.1	7441249	7562907	+	3	Genome	Chr2
KPNA5	435.987	-0.302699	0.0628556	23.1454	1.50202e-06	6.74296e-06	NW_005081642.1	375096	395341	-	3	Genome	Chr2
L3MBTL3	173.383	-0.30013	0.093963	10.1695	0.00142783	0.00395108	NW_005081591.1	241848	310209	-	3	Genome	Chr2
LAMA2	123.215	0.312505	0.124111	6.28131	0.0122018	0.0272715	NW_005081591.1	493181	836481	-	3	Genome	Chr2
LAMA4	421.863	0.415075	0.0780629	28.1022	1.15076e-07	6.17277e-07	NW_005081561.1	182617	282078	+	3	Genome	Chr2
LBR	402.039	0.180976	0.0591805	9.34345	0.00223784	0.00594107	NW_005081602.1	1441231	1453194	+	3	Genome	Chr2
LCA5	55.8921	-0.804741	0.177602	20.2681	6.73135e-06	2.6977e-05	NW_005081569.1	1056489	1074118	-	3	Genome	Chr2
LCLAT1	770.837	0.287196	0.0546594	27.5377	1.54064e-07	8.01747e-07	NW_005081742.1	48299	164028	-	3	Genome	Chr2
LGALSL	915.742	-0.202427	0.0360516	31.5325	1.96132e-08	1.15906e-07	NW_005081615.1	1639872	1648524	+	3	Genome	Chr2
LMBRD1	282.245	-0.466035	0.110295	17.5866	2.74518e-05	0.00010292	NW_005081553.1	693345	760718	+	3	Genome	Chr2
LOC102060438	99.0257	-1.38908	0.130481	113.259	1.89341e-26	4.7155e-25	NW_005081574.1	3737471	3748682	+	3	Genome	Chr2
LOC102060631	5613.94	-0.588752	0.0423662	191.589	1.43072e-43	8.31405e-42	NW_005081602.1	3785986	3788250	-	3	Genome	Chr2
LOC102060825	386.343	-0.482959	0.065943	53.5166	2.56415e-13	2.57895e-12	NW_005081699.1	1109139	1152508	+	3	Genome	Chr2
LOC102061960	205.861	0.379688	0.0845638	20.1157	7.28977e-06	2.91034e-05	NW_005081662.1	526365	571366	+	3	Genome	Chr2
LOC102062003	581.521	-0.170304	0.0572473	8.83266	0.00295886	0.0076754	NW_005081569.1	4784181	4817438	-	3	Genome	Chr2
LOC102062263	3.42461	-3.34746	1.18805	6.50409	0.0107627	0.0244203	NW_005081876.1	256	94214	+	3	Genome	Chr2
LOC102062283	102.385	0.3625	0.120891	8.94611	0.00278061	0.00725316	NW_005081548.1	5800144	5807442	-	3	Genome	Chr2
LOC102062622	142.47	-0.605388	0.134315	19.9668	7.87986e-06	3.12209e-05	NW_005081876.1	208051	216485	+	3	Genome	Chr2
LOC102062802	1324.39	0.389275	0.0326572	142.117	9.16836e-33	3.09358e-31	NW_005081876.1	217613	227702	-	3	Genome	Chr2
LOC102062955	127.709	-0.55643	0.11034	25.3877	4.6889e-07	2.31349e-06	NW_005081611.1	3046608	3057278	-	3	Genome	Chr2
LOC102063416	89.9269	-0.99557	0.13887	51.0676	8.92379e-13	8.40927e-12	NW_005081577.1	5398826	5404127	+	3	Genome	Chr2
LOC102064078	24.2579	-0.625896	0.240076	6.75073	0.00937096	0.0215904	NW_005081653.1	26746	38322	-	3	Genome	Chr2
LOC102064234	3789.9	-0.278833	0.0539193	26.5947	2.50934e-07	1.26191e-06	NW_005081561.1	6517632	6544218	+	3	Genome	Chr2
LOC102064629	270.888	-0.464252	0.0671912	47.769	4.79505e-12	4.21481e-11	NW_005081591.1	2432264	2543256	-	3	Genome	Chr2
LOC102065150	1746.3	0.0785603	0.0332714	5.57258	0.0182438	0.0383965	NW_005081548.1	225748	232709	-	3	Genome	Chr2
LOC102065273	220.792	-1.03814	0.109217	88.8514	4.25615e-21	8.39987e-20	NW_005081577.1	1893007	1897379	+	3	Genome	Chr2
LOC102065341	31.2559	-1.75176	0.264623	42.3907	7.4745e-11	5.62469e-10	NA	NA	NA	NA	NA	NA	NA
LOC102065471	4.85278	-4.35387	0.965746	17.7593	2.50689e-05	9.46643e-05	NW_005081615.1	957388	966410	+	3	Genome	Chr2
LOC102065774	48.4777	-0.900681	0.167393	28.9402	7.46489e-08	4.13136e-07	NW_005081611.1	3557302	3578144	-	3	Genome	Chr2
LOC102065846	238.74	-0.253343	0.0812769	9.69233	0.00185038	0.00500129	NA	NA	NA	NA	NA	NA	NA
LOC102066018	192.109	0.615506	0.203002	8.82919	0.0029645	0.0076754	NW_005081602.1	3684267	3691625	+	3	Genome	Chr2
LOC102066248	386.443	-0.45592	0.0693839	43.0335	5.38106e-11	4.16933e-10	NW_005081569.1	6382106	6391140	+	3	Genome	Chr2
LOC102066536	7.91346	-1.64287	0.621342	6.87948	0.00871911	0.0203576	NW_005081569.1	6394426	6412159	+	3	Genome	Chr2
LOC102067096	504.667	0.465747	0.0617917	56.65	5.2072e-14	5.3928e-13	NW_005081742.1	347780	353803	+	3	Genome	Chr2
LOC102067187	77.5951	-0.651058	0.154639	17.5307	2.82708e-05	0.000105236	NA	NA	NA	NA	NA	NA	NA
LOC102067897	365.985	-0.443865	0.0564652	61.8715	3.6661e-15	4.30869e-14	NW_005081548.1	9787370	9895593	+	3	Genome	Chr2
LOC102068269	131.56	-0.991868	0.132939	54.7286	1.38376e-13	1.40525e-12	NW_005081574.1	4872322	4874935	-	3	Genome	Chr2
LOC102068338	350.148	-0.603842	0.0711077	71.8947	2.26988e-17	3.39184e-16	NW_005081620.1	676796	696234	-	3	Genome	Chr2
LOC102070362	36.2601	0.998009	0.24607	15.9296	6.57431e-05	0.000226208	NA	NA	NA	NA	NA	NA	NA
LOC102070476	797.328	-0.300551	0.04673	41.3196	1.29263e-10	9.52179e-10	NW_005081611.1	5495	531707	-	3	Genome	Chr2
LOC102071223	147.412	0.504102	0.153389	10.5152	0.00118398	0.00333811	NA	NA	NA	NA	NA	NA	NA
LOC102071828	103.839	-0.746064	0.134344	30.5458	3.26072e-08	1.89421e-07	NW_005081569.1	2892436	2922541	+	3	Genome	Chr2
LOC102073633	345.149	-0.673453	0.0870623	59.2305	1.40247e-14	1.56062e-13	NW_005081548.1	4114165	4118829	-	3	Genome	Chr2
LOC102073706	252.724	-0.779304	0.0810003	92.3467	7.27461e-22	1.49201e-20	NA	NA	NA	NA	NA	NA	NA
LOC102074043	14.9707	-1.94801	0.484324	13.9894	0.000183844	0.000586282	NW_005081561.1	2833434	2845929	+	3	Genome	Chr2
LOC102074112	80.1363	-1.70748	0.194277	73.7798	8.73374e-18	1.36351e-16	NW_005081642.1	439799	444037	-	3	Genome	Chr2
LOC102074165	310.718	-1.49488	0.0941963	246.856	1.25829e-55	8.77449e-54	NW_005081632.1	651095	696794	+	3	Genome	Chr2
LOC102074649	5582.66	-0.353124	0.0310036	129.395	5.55747e-30	1.70974e-28	NW_005081577.1	1233522	1240159	-	3	Genome	Chr2
LOC102074665	20.3825	-3.39286	0.530394	34.399	4.48942e-09	2.86338e-08	NW_005081620.1	2304231	2306462	+	3	Genome	Chr2
LOC102075018	16.9527	-3.04057	0.572476	22.5411	2.05692e-06	9.04006e-06	NW_005081615.1	1604649	1615831	-	3	Genome	Chr2
LOC106629220	53.893	1.73964	0.186272	86.9874	1.09214e-20	2.11551e-19	NA	NA	NA	NA	NA	NA	NA
LOC106629309	250.595	-0.240062	0.0852782	7.89296	0.00496276	0.0121286	NW_005081561.1	7412877	7417938	+	3	Genome	Chr2
LOC106629369	33.5864	4.5111	0.771697	23.1502	1.49829e-06	6.74296e-06	NA	NA	NA	NA	NA	NA	NA
LOC106629377	46.0702	-0.48947	0.201288	5.7931	0.0160892	0.0346996	NW_005081577.1	762222	774607	+	3	Genome	Chr2
LOC106629469	7.91419	1.06874	0.46574	5.22121	0.022313	0.0459438	NA	NA	NA	NA	NA	NA	NA
LOC106629471	15.7233	-1.00753	0.346875	8.13369	0.00434503	0.0107955	NW_005081602.1	414800	418758	+	3	Genome	Chr2
LOC106629504	211.221	-0.318746	0.0974185	10.6389	0.00110735	0.00313052	NA	NA	NA	NA	NA	NA	NA
LOC106629714	52.7137	1.11481	0.164914	45.6851	1.38876e-11	1.13488e-10	NA	NA	NA	NA	NA	NA	NA
LOC106629773	56.819	0.569233	0.223291	6.20395	0.0127466	0.0283076	NA	NA	NA	NA	NA	NA	NA
LOC113458737	118.32	0.483675	0.103555	21.8008	3.02482e-06	1.29141e-05	NA	NA	NA	NA	NA	NA	NA
LOC113458741	49.7517	-1.0698	0.267067	14.8357	0.000117292	0.000389483	NA	NA	NA	NA	NA	NA	NA
LOC113458750	31.3719	-2.02365	0.248228	66.7477	3.08572e-16	4.03458e-15	NA	NA	NA	NA	NA	NA	NA
LOC113458753	4.1887	4.41601	1.09658	14.4806	0.000141611	0.000462892	NA	NA	NA	NA	NA	NA	NA
LOC113458860	6.80934	5.2962	0.897302	32.6842	1.08413e-08	6.5549e-08	NA	NA	NA	NA	NA	NA	NA
LOC113458864	8.71489	6.34332	0.865054	56.6879	5.10774e-14	5.3427e-13	NA	NA	NA	NA	NA	NA	NA
LOC113458865	20.8089	1.14121	0.310556	12.9331	0.000322819	0.00100497	NA	NA	NA	NA	NA	NA	NA
LOC113458866	3.14062	-3.61942	1.33151	6.68778	0.00970761	0.0222192	NA	NA	NA	NA	NA	NA	NA
LOC113459042	10.218	-4.15547	0.783404	21.7769	3.06258e-06	1.30222e-05	NA	NA	NA	NA	NA	NA	NA
LOC113459045	4.38713	-4.1847	1.17902	10.272	0.00135065	0.00375741	NA	NA	NA	NA	NA	NA	NA
LOC113459048	8.74084	5.70468	0.869763	39.4865	3.30328e-10	2.28823e-09	NA	NA	NA	NA	NA	NA	NA
LOC113459138	5.26906	-5.7802	0.981698	33.3619	7.65067e-09	4.76345e-08	NA	NA	NA	NA	NA	NA	NA
LOC113459140	267.337	-0.591352	0.0896439	43.2428	4.83509e-11	3.77426e-10	NA	NA	NA	NA	NA	NA	NA
LOC113459141	30.3727	-1.16201	0.268123	17.9853	2.22617e-05	8.46754e-05	NA	NA	NA	NA	NA	NA	NA
LOC113459144	8.5444	1.71618	0.644158	6.04393	0.0139542	0.030664	NA	NA	NA	NA	NA	NA	NA
LOC113459148	1937.69	-0.33204	0.028425	136.435	1.60257e-31	5.07965e-30	NW_005081569.1	5024559	5033224	+	3	Genome	Chr2
LOC113459204	14.598	-6.41807	0.824638	66.3831	3.7128e-16	4.79456e-15	NA	NA	NA	NA	NA	NA	NA
LOC113459213	576.223	-0.130107	0.0489791	7.05246	0.00791566	0.0186902	NA	NA	NA	NA	NA	NA	NA
LOC113459215	35.3342	1.08901	0.204753	28.2314	1.07642e-07	5.83387e-07	NA	NA	NA	NA	NA	NA	NA
LOC113459240	37.5129	-0.562811	0.198872	7.98333	0.00472099	0.0115919	NA	NA	NA	NA	NA	NA	NA
LOC113459244	38.8346	-0.532878	0.231911	5.11813	0.0236771	0.0484661	NW_005081577.1	1242562	1251365	+	3	Genome	Chr2
LOC113459245	5.04779	3.74572	1.03718	9.93034	0.00162577	0.00442852	NA	NA	NA	NA	NA	NA	NA
LOC113459247	833.139	0.239643	0.105205	5.13547	0.0234418	0.0480787	NA	NA	NA	NA	NA	NA	NA
LOC113459251	62.7855	1.36856	0.18721	52.0632	5.37423e-13	5.15729e-12	NA	NA	NA	NA	NA	NA	NA
LOC113459313	5.46451	5.20219	0.95244	28.8831	7.688e-08	4.23245e-07	NA	NA	NA	NA	NA	NA	NA
LOC113459366	13.3163	-2.85463	0.504973	30.3498	3.60739e-08	2.07326e-07	NA	NA	NA	NA	NA	NA	NA
LOC113459375	14.6058	-0.932157	0.339919	7.32295	0.00680795	0.0161844	NA	NA	NA	NA	NA	NA	NA
LOC113459407	7.22332	-6.18943	0.897827	48.088	4.07512e-12	3.64323e-11	NA	NA	NA	NA	NA	NA	NA
LOC113459462	366.54	0.385924	0.0621583	38.522	5.41402e-10	3.67732e-09	NA	NA	NA	NA	NA	NA	NA
LOC113459466	9.41874	5.88179	0.865655	46.1855	1.07572e-11	9.00164e-11	NA	NA	NA	NA	NA	NA	NA
LOC113459542	506.342	-0.426584	0.175546	5.72731	0.016703	0.0358754	NA	NA	NA	NA	NA	NA	NA
LOC113459545	26.357	1.30471	0.268848	23.1989	1.46079e-06	6.61465e-06	NA	NA	NA	NA	NA	NA	NA
LOC113459572	10.685	-4.97274	0.883248	25.6138	4.17054e-07	2.06748e-06	NA	NA	NA	NA	NA	NA	NA
LOC113459573	27.0037	-1.26235	0.303065	16.2503	5.54995e-05	0.000196123	NA	NA	NA	NA	NA	NA	NA
LOC113459574	21.5346	2.45998	0.31602	61.0048	5.69362e-15	6.54453e-14	NA	NA	NA	NA	NA	NA	NA
LOC113459611	6.45621	1.7054	0.641039	6.39584	0.0114388	0.0258423	NA	NA	NA	NA	NA	NA	NA
LOC113459619	7.7214	-6.15174	0.884547	49.727	1.76699e-12	1.60719e-11	NA	NA	NA	NA	NA	NA	NA
LOC113459681	12.2088	-1.85645	0.558947	9.31017	0.00227886	0.00603464	NA	NA	NA	NA	NA	NA	NA
LOC113459726	13.6854	-4.71363	0.671129	49.8849	1.63032e-12	1.50913e-11	NA	NA	NA	NA	NA	NA	NA
LOC113459787	34.9033	-1.35855	0.255914	27.0652	1.96705e-07	1.00963e-06	NA	NA	NA	NA	NA	NA	NA
LOC113459790	3.62971	-4.67419	1.34724	10.08	0.00149885	0.00412577	NA	NA	NA	NA	NA	NA	NA
LPGAT1	1128.64	-0.120835	0.0464682	6.75085	0.0093703	0.0215904	NW_005081548.1	3907780	3966912	+	3	Genome	Chr2
LRP11	1010.28	-0.425562	0.0374573	129.089	6.48364e-30	1.93768e-28	NW_005081596.1	1029361	1042217	-	3	Genome	Chr2
LRPPRC	900.631	-0.124689	0.0497293	6.27589	0.0122391	0.0272967	NW_005081548.1	7215489	7292568	-	3	Genome	Chr2
LRRC1	187.689	-0.378018	0.0838416	20.3111	6.58191e-06	2.66848e-05	NW_005081569.1	6033008	6102272	-	3	Genome	Chr2
LRRC73	804.616	-0.186113	0.052672	12.4583	0.00041613	0.00126533	NW_005081574.1	3818058	3824497	+	3	Genome	Chr2
LTBP1	103.254	-1.49506	0.143855	106.849	4.80427e-25	1.11673e-23	NW_005081574.1	4046046	4231553	-	3	Genome	Chr2
LTV1	408.524	0.453509	0.0562865	64.9359	7.73734e-16	9.55677e-15	NW_005081632.1	775138	785102	-	3	Genome	Chr2
LYPLAL1	49.9021	-0.502473	0.180101	7.68961	0.00555397	0.0134478	NW_005081548.1	812666	838641	-	3	Genome	Chr2
LYST	634.312	-0.180666	0.0435959	17.174	3.41067e-05	0.000125178	NW_005081589.1	2714348	2802997	+	3	Genome	Chr2
MACROD2	760.574	-0.156433	0.0436747	12.8227	0.000342432	0.00105659	NW_005081602.1	1993653	2845327	-	3	Genome	Chr2
MAL	126.502	-0.522248	0.111177	21.9741	2.76357e-06	1.18959e-05	NW_005081615.1	674449	683288	-	3	Genome	Chr2
MAP1LC3C	54.6157	-0.835483	0.204271	16.2753	5.47727e-05	0.000194211	NW_005081589.1	391653	393981	+	3	Genome	Chr2
MAP3K21	219.191	-0.725068	0.107336	45.046	1.92463e-11	1.54859e-10	NW_005081589.1	3650445	3691409	-	3	Genome	Chr2
MAP3K5	111.018	0.260667	0.111758	5.42357	0.0198667	0.0413132	NW_005081611.1	2465623	2563486	-	3	Genome	Chr2
MAP3K7	672.965	0.373921	0.0575621	42.0688	8.81186e-11	6.58371e-10	NW_005081553.1	4949665	4997583	-	3	Genome	Chr2
MAP7	421.676	-0.245597	0.0782403	9.79808	0.00174695	0.00473395	NW_005081611.1	2353795	2452887	-	3	Genome	Chr2
MATN3	27.4139	-0.918199	0.324306	7.45868	0.00631312	0.0151457	NW_005081561.1	6569818	6582253	+	3	Genome	Chr2
MBOAT2	478.349	-0.396461	0.0504861	61.7077	3.98418e-15	4.6305e-14	NW_005081582.1	1448661	1524206	+	3	Genome	Chr2
MDGA1	183.909	-1.17143	0.0868694	183.412	8.72011e-42	4.56062e-40	NW_005081620.1	275779	367678	+	3	Genome	Chr2
MDH1	2210.63	0.129211	0.0317307	16.5727	4.68196e-05	0.000169458	NW_005081615.1	1397274	1408964	+	3	Genome	Chr2
ME1	394.254	-0.277184	0.0715795	14.9456	0.000110655	0.000368614	NW_005081569.1	2564572	2719043	-	3	Genome	Chr2
MEA1	820.623	-0.261658	0.0376214	48.3911	3.49153e-12	3.1484e-11	NW_005081577.1	98242	99572	+	3	Genome	Chr2
MED23	541.883	-0.492895	0.0551245	79.8434	4.05293e-19	6.94977e-18	NW_005081729.1	346650	384400	-	3	Genome	Chr2
METTL24	57.8111	-0.682983	0.195292	11.9099	0.00055836	0.00167829	NW_005081561.1	1094442	1141027	+	3	Genome	Chr2
MFSD4B	707.979	0.443156	0.0444289	99.5009	1.96079e-23	4.18569e-22	NW_005081561.1	689647	700554	-	3	Genome	Chr2
MGME1	47.4963	-0.935648	0.163447	32.8646	9.88083e-09	6.04406e-08	NW_005081602.1	3903835	3911455	+	3	Genome	Chr2
MKKS	622.704	-0.210507	0.0525632	16.017	6.2777e-05	0.000217433	NW_005081577.1	5535192	5542568	-	3	Genome	Chr2
MOCS1	511.685	-0.216838	0.0590614	13.4535	0.000244554	0.000775163	NW_005081548.1	10842196	10872418	+	3	Genome	Chr2
MOXD1	165.04	0.485873	0.118987	16.5126	4.83268e-05	0.00017392	NW_005081729.1	722652	759529	-	3	Genome	Chr2
MRAP2	11.1442	-1.31478	0.51426	5.75234	0.0164667	0.0354407	NW_005081569.1	2953326	2964960	+	3	Genome	Chr2
MRPL14	99.4276	0.436775	0.128757	11.426	0.000724242	0.00212201	NW_005081620.1	766938	777197	+	3	Genome	Chr2
MRPL33	295.102	0.446442	0.0885854	25.2288	5.09165e-07	2.50041e-06	NW_005081548.1	9725306	9731002	-	3	Genome	Chr2
MRPS18A	507.845	0.422834	0.0509228	68.9536	1.00807e-16	1.42491e-15	NW_005081620.1	1237874	1260176	+	3	Genome	Chr2
MRPS5	343.952	0.404722	0.0693326	33.9977	5.51771e-09	3.49789e-08	NW_005081615.1	644149	671342	+	3	Genome	Chr2
MSH2	148.33	1.01677	0.112083	81.6637	1.61333e-19	2.86024e-18	NW_005081662.1	70957	119370	+	3	Genome	Chr2
MSH5	2.8729	3.67709	1.19406	7.39854	0.00652768	0.0155889	NW_005081729.1	202339	205323	-	3	Genome	Chr2
MTA3	791.041	0.244956	0.0628423	15.1264	0.000100545	0.000336006	NW_005081548.1	5762030	5994678	+	3	Genome	Chr2
MTFR2	88.2229	-0.319772	0.123619	6.67085	0.00980025	0.0223335	NW_005081611.1	2279848	2289473	-	3	Genome	Chr2
MTO1	362.453	-0.353414	0.0645661	29.9199	4.50266e-08	2.57365e-07	NW_005081654.1	898118	905255	+	3	Genome	Chr2
MTR	155.224	-0.571988	0.122394	21.5553	3.43776e-06	1.44414e-05	NW_005081589.1	2317995	2369564	-	3	Genome	Chr2
MTRF1L	117.383	-0.65823	0.0987769	44.5463	2.48416e-11	1.96851e-10	NW_005081596.1	2390979	2400381	-	3	Genome	Chr2
MYT1L	718.955	-0.299685	0.0468714	40.8495	1.64414e-10	1.17793e-09	NW_005081582.1	4217948	4533610	+	3	Genome	Chr2
NBAS	241.874	-0.243606	0.08884	7.48447	0.00622335	0.0149646	NW_005081621.1	1454601	1615580	+	3	Genome	Chr2
NCOA7	905.711	-0.149245	0.0504312	8.74144	0.00311059	0.0079943	NW_005081591.1	2133706	2209866	-	3	Genome	Chr2
NDUFAF5	87.1031	-1.85857	0.167897	119.428	8.44082e-28	2.26387e-26	NW_005081602.1	2892229	2900418	-	3	Genome	Chr2
NFKBIE	422.54	-1.22047	0.0609186	402.295	1.74339e-89	6.0786e-87	NW_005081620.1	608324	621444	+	3	Genome	Chr2
NID1	239.56	-0.494766	0.0971796	25.7241	3.93874e-07	1.96187e-06	NW_005081589.1	2627523	2670714	+	3	Genome	Chr2
NKAIN2	1017.26	-0.214125	0.0401012	28.4934	9.40187e-08	5.14888e-07	NW_005081591.1	2622644	3149250	-	3	Genome	Chr2
NMBR	33.8604	-1.37008	0.259895	26.8013	2.25489e-07	1.14496e-06	NW_005081632.1	1564227	1590446	+	3	Genome	Chr2
NR2E1	224.349	-0.375518	0.0936898	15.9764	6.41381e-05	0.000221414	NW_005081561.1	2013085	2031756	-	3	Genome	Chr2
NRXN1	3009.85	-0.258863	0.0319158	65.7	5.25069e-16	6.61714e-15	NW_005081662.1	1029890	1717427	-	3	Genome	Chr2
NSL1	291.846	0.312335	0.0692282	20.3344	6.50227e-06	2.64645e-05	NW_005081548.1	3601273	3610776	+	3	Genome	Chr2
NT5DC1	194.64	-0.518014	0.122695	17.5421	2.81016e-05	0.000104979	NW_005081642.1	511109	637875	-	3	Genome	Chr2
NT5E	298.467	-0.223048	0.0945334	5.52274	0.0187708	0.0392147	NW_005081569.1	3500853	3527567	+	3	Genome	Chr2
NTPCR	245.732	-2.29264	0.0976456	551.064	7.3872e-122	3.8635e-119	NW_005081589.1	3852325	3866096	-	3	Genome	Chr2
NUS1	401.791	0.390867	0.0537759	52.8755	3.55376e-13	3.50683e-12	NW_005081697.1	10636	20458	+	3	Genome	Chr2
OGFRL1	1020.33	-0.15532	0.0519828	8.90533	0.0028434	0.0073985	NW_005081553.1	6181	19458	+	3	Genome	Chr2
OLIG3	2.50388	4.45064	1.43304	9.07531	0.00259083	0.00677502	NW_005081611.1	2841670	2843721	-	3	Genome	Chr2
OPRM1	565.923	-0.332344	0.067645	24.0259	9.5049e-07	4.45835e-06	NW_005081596.1	2829913	2839310	+	3	Genome	Chr2
PACRG	65.1454	0.586788	0.16374	12.6929	0.000367052	0.00112923	NW_005081574.1	2621036	2831876	-	3	Genome	Chr2
PAK5	347.468	-0.506416	0.0773125	42.683	6.43685e-11	4.87895e-10	NW_005081577.1	5227680	5416404	-	3	Genome	Chr2
PCMT1	1737.34	-0.293984	0.0364602	64.9286	7.76602e-16	9.55677e-15	NW_005081596.1	989676	1023736	+	3	Genome	Chr2
PCSK2	2237.86	-0.72153	0.0367324	383.52	2.13064e-85	4.45731e-83	NW_005081883.1	19156	128705	+	3	Genome	Chr2
PDIA6	908.123	-0.112029	0.0425934	6.91306	0.00855686	0.0200234	NW_005081582.1	415853	431919	+	3	Genome	Chr2
PDSS2	432.35	0.262234	0.0727925	12.9224	0.000324669	0.00100773	NW_005081561.1	2400430	2528889	+	3	Genome	Chr2
PELI1	660.573	-0.125623	0.0490168	6.56251	0.0104149	0.0236826	NW_005081615.1	1520687	1551172	-	3	Genome	Chr2
PEX6	824.034	0.340687	0.0412128	68.3339	1.38028e-16	1.87503e-15	NW_005081577.1	232537	245519	+	3	Genome	Chr2
PGBD5	1954.92	-0.583757	0.0369175	249.103	4.07363e-56	3.04358e-54	NW_005081653.1	771305	839360	-	3	Genome	Chr2
PGM3	160.997	-0.842264	0.166845	24.4403	7.66482e-07	3.62778e-06	NW_005081569.1	2549964	2558228	-	3	Genome	Chr2
PHACTR2	1041.46	0.162927	0.0668973	5.89652	0.0151709	0.0329227	NW_005081632.1	793435	925088	-	3	Genome	Chr2
PIGM	52.8325	-0.916081	0.168294	29.4946	5.60723e-08	3.17036e-07	NW_005081589.1	598078	600448	-	3	Genome	Chr2
PKIB	57.9583	-0.670665	0.201437	10.7638	0.00103507	0.00295008	NW_005081591.1	3638669	3692922	-	3	Genome	Chr2
PLAGL1	136.85	-0.290716	0.11482	6.36747	0.0116231	0.0261082	NW_005081632.1	733586	760599	+	3	Genome	Chr2
PLB1	32.7216	-1.38642	0.330723	16.1216	5.94037e-05	0.000209213	NW_005081548.1	9331888	9426676	-	3	Genome	Chr2
PLCB1	5250.26	-0.250581	0.0282305	78.685	7.28464e-19	1.19058e-17	NW_005081577.1	4723820	5028221	+	3	Genome	Chr2
PLCB4	251.547	-0.404746	0.0814762	24.6077	7.02691e-07	3.35623e-06	NW_005081577.1	5116242	5211246	+	3	Genome	Chr2
PLD5	194.356	-0.204382	0.0767578	7.08884	0.00775655	0.018356	NW_005081620.1	1320972	1503301	-	3	Genome	Chr2
PLEKHG1	416.909	0.196319	0.072179	7.37037	0.00663072	0.0157989	NW_005081596.1	1277335	1403237	+	3	Genome	Chr2
PLN	90.7701	1.76417	0.156583	127.098	1.76779e-29	5.13643e-28	NW_005081697.1	388770	405213	+	3	Genome	Chr2
PM20D2	489.122	-0.661283	0.0718518	84.0728	4.76888e-20	8.60042e-19	NW_005081569.1	4687362	4703770	+	3	Genome	Chr2
PNISR	514.285	-0.138879	0.0581607	5.69298	0.0170329	0.0365091	NW_005081553.1	8624523	8649938	-	3	Genome	Chr2
POLH	89.835	-0.401627	0.136421	8.59587	0.00336927	0.00857483	NW_005081574.1	3763884	3774057	-	3	Genome	Chr2
POLR1B	116.759	-0.782972	0.124137	39.4707	3.33019e-10	2.2917e-09	NW_005081577.1	255139	266783	-	3	Genome	Chr2
POLR1C	124.94	-0.39376	0.109034	12.9977	0.000311877	0.0009738	NW_005081574.1	3804732	3808155	-	3	Genome	Chr2
PPIL4	246.098	-0.500077	0.0739515	45.7148	1.36787e-11	1.12661e-10	NW_005081589.1	347047	368961	-	3	Genome	Chr2
PPM1B	221.355	-0.551002	0.112831	23.5142	1.23997e-06	5.66377e-06	NW_005081548.1	7404410	7440306	+	3	Genome	Chr2
PPP1CB	1961.63	-0.186246	0.0290433	41.1129	1.43684e-10	1.04371e-09	NW_005081548.1	9275712	9294688	-	3	Genome	Chr2
PPP1R14C	12.2231	3.55118	0.58454	33.8927	5.82375e-09	3.66966e-08	NW_005081596.1	1095094	1146048	+	3	Genome	Chr2
PPP4R3B	225.022	-0.260697	0.0685504	14.4717	0.00014228	0.000463629	NW_005081577.1	1997598	2015269	-	3	Genome	Chr2
PREPL	118.66	-0.953778	0.130255	52.9696	3.38752e-13	3.37462e-12	NW_005081548.1	7454449	7481033	-	3	Genome	Chr2
PRKCE	1673.12	-0.370994	0.0445024	69.271	8.58227e-17	1.24681e-15	NW_005081548.1	8241902	8528158	+	3	Genome	Chr2
PROKR1	45.287	-0.609009	0.196116	9.56185	0.00198663	0.00532824	NW_005081615.1	3419645	3432995	-	3	Genome	Chr2
PRSS35	143.044	-0.414676	0.122702	11.3085	0.000771523	0.00225423	NW_005081569.1	2754317	2764045	+	3	Genome	Chr2
PSEN2	1131.5	0.188343	0.0450171	17.4794	2.90434e-05	0.000107728	NW_005081602.1	769335	786951	-	3	Genome	Chr2
PSME4	567.91	-0.330899	0.0569361	33.7088	6.40089e-09	4.00918e-08	NW_005081577.1	1432520	1478021	-	3	Genome	Chr2
PTK7	199.576	-0.39093	0.0837744	21.7449	3.11416e-06	1.31879e-05	NW_005081602.1	36567	70738	+	3	Genome	Chr2
PTPN14	414.482	-0.362111	0.0719824	25.2025	5.16161e-07	2.52292e-06	NW_005081548.1	2814604	2921569	+	3	Genome	Chr2
PTPRK	468.347	-0.215047	0.062295	11.8905	0.000564213	0.00168676	NW_005081591.1	938814	1319504	+	3	Genome	Chr2
PXDN	163.123	0.281644	0.114504	5.99317	0.0143614	0.0313612	NW_005081582.1	4552055	4634072	+	3	Genome	Chr2
QKI	638.624	-0.302224	0.0615014	24.0647	9.31537e-07	4.38914e-06	NW_005081574.1	2417678	2570741	-	3	Genome	Chr2
QPCT	83.9804	-0.524196	0.132432	15.5939	7.85058e-05	0.000265751	NW_005081699.1	894878	913202	+	3	Genome	Chr2
RAB32	25.528	-0.628155	0.237206	6.94031	0.00842747	0.0198093	NW_005081611.1	918626	938692	-	3	Genome	Chr2
RAB3GAP2	817.034	-0.14595	0.0425605	11.7536	0.000607257	0.00179941	NW_005081548.1	425730	461726	+	3	Genome	Chr2
RAB4A	1160.53	-0.13939	0.0410997	11.4917	0.000699083	0.00205405	NW_005081653.1	407371	425300	+	3	Genome	Chr2
RCOR3	214.274	-0.236374	0.0796836	8.78813	0.00303197	0.00781144	NW_005081548.1	4144784	4171800	-	3	Genome	Chr2
REL	15.5849	-1.30699	0.385602	10.8955	0.000964003	0.00277019	NW_005081577.1	3683147	3706950	+	3	Genome	Chr2
REV3L	271.163	0.181027	0.0693541	6.80719	0.00907917	0.0210106	NW_005081561.1	576938	689424	+	3	Genome	Chr2
RGS17	453.285	-0.433705	0.0533065	66.2254	4.02193e-16	5.13041e-15	NW_005081596.1	2405230	2444602	-	3	Genome	Chr2
RHOU	566.043	0.242224	0.0598245	16.3562	5.24836e-05	0.000187365	NW_005081653.1	203437	210617	+	3	Genome	Chr2
RMDN2	90.4284	0.539504	0.160485	11.0876	0.000869055	0.00252509	NW_005081574.1	4799225	4849883	+	3	Genome	Chr2
RNASEH1	337.485	-0.459631	0.0671652	46.7667	7.99592e-12	6.85552e-11	NW_005081582.1	3773052	3780144	+	3	Genome	Chr2
RNF144A	1080.24	0.547573	0.045	147.625	5.72947e-34	2.06656e-32	NW_005081582.1	2381842	2444090	-	3	Genome	Chr2
RNF146	1050.9	0.453893	0.0425793	113.44	1.72841e-26	4.40956e-25	NW_005081591.1	1595870	1606896	-	3	Genome	Chr2
RPS12	89.5884	-2.73576	0.214417	152.124	5.95402e-35	2.30663e-33	NW_005081729.1	907660	911630	+	3	Genome	Chr2
RPS27A	863.891	0.2981	0.0622159	22.8456	1.75552e-06	7.78082e-06	NW_005081577.1	1880165	1881392	+	3	Genome	Chr2
RPS6KA2	137.464	-0.511539	0.126682	16.1046	5.99372e-05	0.000210383	NW_005081574.1	851664	1130471	+	3	Genome	Chr2
RPS6KC1	496.061	-0.507367	0.183566	7.40483	0.00650491	0.0155701	NW_005081548.1	3412800	3497824	-	3	Genome	Chr2
RRP36	1530.85	-0.398041	0.0329644	145.715	1.49825e-33	5.2239e-32	NW_005081577.1	64393	71382	-	3	Genome	Chr2
RSPH3	93.4392	-0.344213	0.135955	6.35495	0.0117055	0.0262182	NW_005081632.1	707194	714851	+	3	Genome	Chr2
RYR2	939.617	-0.268574	0.0505569	28.154	1.12035e-07	6.04066e-07	NW_005081589.1	1901667	2284289	-	3	Genome	Chr2
SAMD3	74.0435	-0.606918	0.181833	10.8469	0.000989614	0.00283599	NW_005081591.1	200171	243121	+	3	Genome	Chr2
SCCPDH	960.952	0.249448	0.0420167	35.2169	2.94957e-09	1.89279e-08	NW_005081620.1	3170714	3181122	+	3	Genome	Chr2
SDCCAG8	95.248	0.530448	0.146988	12.84	0.000339286	0.00104998	NW_005081620.1	1762446	1868980	+	3	Genome	Chr2
SEC63	780.471	0.257136	0.0524258	24.0059	9.60417e-07	4.4848e-06	NW_005081561.1	2117938	2172897	+	3	Genome	Chr2
SERAC1	435.392	0.202381	0.0640601	9.96004	0.00159974	0.00437341	NW_005081632.1	291472	316304	-	3	Genome	Chr2
SERINC1	9633.36	-0.239961	0.0308623	60.3489	7.94487e-15	9.03298e-14	NW_005081591.1	3714900	3733027	+	3	Genome	Chr2
SERTAD4	51.5287	-0.666205	0.211051	9.64954	0.00189399	0.00510596	NW_005081548.1	4573031	4579016	-	3	Genome	Chr2
SGK1	569.909	-0.347577	0.0606583	32.7345	1.05644e-08	6.42462e-08	NW_005081746.1	145372	215279	+	3	Genome	Chr2
SH3BGRL2	2708.5	-0.725937	0.0451049	256.508	9.90393e-58	7.96886e-56	NW_005081569.1	1105267	1143760	+	3	Genome	Chr2
SH3YL1	41.8029	-0.800275	0.198178	16.0769	6.08212e-05	0.000212772	NW_005081609.1	617157	662650	+	3	Genome	Chr2
SIPA1L2	205.634	-0.409747	0.0775228	27.9404	1.25107e-07	6.67665e-07	NW_005081589.1	4022367	4121130	+	3	Genome	Chr2
SLC16A10	42.6284	1.0139	0.211647	22.452	2.15466e-06	9.43001e-06	NW_005081561.1	702270	767578	-	3	Genome	Chr2
SLC1A4	2230.48	-0.617805	0.0361482	290.825	3.28778e-65	3.82113e-63	NW_005081615.1	1859994	1893874	+	3	Genome	Chr2
SLC22A16	287.139	-0.505304	0.0787799	40.9872	1.53231e-10	1.10538e-09	NW_005081561.1	1028636	1064285	+	3	Genome	Chr2
SLC29A1	307.705	-0.471558	0.0734554	41.1157	1.43476e-10	1.04371e-09	NW_005081620.1	641427	675201	-	3	Genome	Chr2
SLC30A1	132.536	-0.289021	0.110431	6.81412	0.00904398	0.0209756	NW_005081548.1	4023346	4031825	+	3	Genome	Chr2
SLC30A10	241.433	-0.261874	0.106481	5.98814	0.0144024	0.0313852	NW_005081548.1	545009	568579	+	3	Genome	Chr2
SLC30A6	71.5229	-0.363572	0.152453	5.63021	0.0176535	0.0373797	NW_005081699.1	918237	933535	-	3	Genome	Chr2
SLC35B2	138.394	-0.688601	0.108664	39.9824	2.56261e-10	1.79898e-09	NW_005081620.1	624805	630419	+	3	Genome	Chr2
SLC3A1	188.567	-1.54132	0.100029	236.844	1.91772e-53	1.25371e-51	NW_005081548.1	7442257	7463043	+	3	Genome	Chr2
SLC4A1AP	181.918	-0.445542	0.0913784	23.7038	1.12361e-06	5.22354e-06	NW_005081548.1	9881845	9897824	-	3	Genome	Chr2
SLC8A1	1823.29	0.0728114	0.0318562	5.2222	0.0223004	0.0459438	NW_005081615.1	337645	452272	-	3	Genome	Chr2
SMC6	1948.8	0.303555	0.0395572	58.7652	1.77652e-14	1.95604e-13	NW_005081621.1	198452	244136	+	3	Genome	Chr2
SMIM8	122.715	1.36809	0.109345	157.698	3.60198e-36	1.50707e-34	NW_005081569.1	3993069	3996668	+	3	Genome	Chr2
SMOC2	185.018	0.658537	0.115008	32.3909	1.26072e-08	7.53553e-08	NW_005081844.1	93025	231237	-	3	Genome	Chr2
SMYD2	157.441	-0.324755	0.0980376	10.9359	0.00094319	0.00272535	NW_005081548.1	2926772	2956091	-	3	Genome	Chr2
SMYD3	43.5865	0.415923	0.174768	5.64182	0.017537	0.0372083	NW_005081620.1	2690069	3073244	-	3	Genome	Chr2
SNAP25	2672.55	-0.20723	0.0364524	32.2685	1.34275e-08	7.98022e-08	NW_005081577.1	5446107	5508866	+	3	Genome	Chr2
SNRPB2	187.549	-0.362952	0.0958854	14.2664	0.000158676	0.000513853	NW_005082187.1	4596	12604	-	3	Genome	Chr2
SNX3	582.599	-0.165057	0.0593145	7.72602	0.00544306	0.0132405	NW_005081561.1	1992535	2010073	+	3	Genome	Chr2
SNX5	108.23	0.327983	0.115954	7.96925	0.00475786	0.0116551	NW_005081602.1	3889224	3903741	-	3	Genome	Chr2
SOBP	371.571	-0.563117	0.0676684	69.0928	9.39394e-17	1.34604e-15	NW_005081561.1	2286782	2400657	-	3	Genome	Chr2
SOGA3	5440.99	0.195424	0.042432	21.1518	4.24297e-06	1.76818e-05	NW_005081591.1	1455041	1482885	+	3	Genome	Chr2
SOS1	246.869	-0.241233	0.0836158	8.29687	0.00397134	0.00998562	NW_005081615.1	98138	131803	+	3	Genome	Chr2
SPATA17	35.5081	-1.38572	0.219346	39.6209	3.08361e-10	2.1503e-09	NW_005081548.1	1359116	1445990	-	3	Genome	Chr2
SPRED2	605.459	-0.211905	0.0447391	22.4344	2.17448e-06	9.4771e-06	NW_005081615.1	1993967	2027852	-	3	Genome	Chr2
SPRTN	167.456	-0.408509	0.104026	15.3291	9.03139e-05	0.000303757	NW_005081653.1	169766	175014	-	3	Genome	Chr2
SPTBN1	2114.96	0.237338	0.0549662	18.554	1.65156e-05	6.39828e-05	NW_005081577.1	1575401	1686073	+	3	Genome	Chr2
SPTLC3	8.568	-2.5957	0.732688	9.12979	0.00251481	0.00662593	NW_005081602.1	3115394	3349539	-	3	Genome	Chr2
SRBD1	72.8311	0.681752	0.160039	17.899	2.32946e-05	8.8283e-05	NW_005081548.1	8098943	8223451	-	3	Genome	Chr2
SRD5A2	50.6373	-1.1455	0.189334	36.2908	1.69962e-09	1.13962e-08	NW_005081699.1	1068367	1086859	+	3	Genome	Chr2
SRP9	546.899	-0.131713	0.0553482	5.6558	0.0173977	0.0370632	NW_005081602.1	1276745	1282476	-	3	Genome	Chr2
STX7	1160.6	-0.266417	0.0355672	56.0948	6.90584e-14	7.08187e-13	NW_005081729.1	791148	815860	-	3	Genome	Chr2
STXBP5	5179.92	-0.358669	0.0270056	176.044	3.54108e-40	1.61042e-38	NW_005081611.1	569606	671885	-	3	Genome	Chr2
SUPT7L	459.08	0.45808	0.09384	23.5204	1.23597e-06	5.66377e-06	NW_005081548.1	9897957	9916175	+	3	Genome	Chr2
SYNDIG1	359.897	-0.492245	0.0618024	63.4273	1.66399e-15	2.00061e-14	NW_005081602.1	3631640	3684434	-	3	Genome	Chr2
SYNJ2	591.669	0.25009	0.0523616	22.7856	1.81117e-06	7.99362e-06	NW_005081632.1	221184	291492	+	3	Genome	Chr2
TAF5L	473.92	-1.79082	0.0667607	716.376	8.21868e-158	8.59674e-155	NW_005081653.1	530522	546109	-	3	Genome	Chr2
TBCC	195.399	-0.376076	0.0797529	22.2291	2.41978e-06	1.04591e-05	NW_005081548.1	4946147	4948769	-	3	Genome	Chr2
TBCE	210.201	0.385457	0.0967741	15.7705	7.15074e-05	0.000243638	NW_005081589.1	2859006	2884581	-	3	Genome	Chr2
TBPL1	162.519	-0.571234	0.0990396	33.1358	8.59435e-09	5.28805e-08	NW_005081746.1	276352	290710	-	3	Genome	Chr2
TBXT	15.8179	-2.36098	0.435137	27.6831	1.42905e-07	7.5115e-07	NW_005081574.1	1257637	1265694	+	3	Genome	Chr2
TCTE1	26.4586	3.71098	0.884236	10.7753	0.00102862	0.00293973	NW_005081620.1	567499	583297	+	3	Genome	Chr2
TDRP	404.214	-0.208219	0.0713433	8.48974	0.00357155	0.00904563	NW_005081609.1	896951	924572	-	3	Genome	Chr2
TENT5A	332.079	-0.232457	0.0782148	8.79732	0.00301674	0.00779139	NW_005081569.1	2007751	2014021	-	3	Genome	Chr2
TFB1M	95.5305	-0.47521	0.118599	16.0171	6.27743e-05	0.000217433	NW_005081596.1	3361643	3387924	-	3	Genome	Chr2
TFB2M	270.35	0.345087	0.0938387	13.4262	0.000248135	0.000784138	NW_005081620.1	3079631	3088741	-	3	Genome	Chr2
TGFB2	385.141	0.686747	0.0675593	103.068	3.23868e-24	7.20778e-23	NW_005081548.1	1053944	1113953	-	3	Genome	Chr2
THBS2	107.416	-0.274231	0.111276	6.0586	0.0138388	0.0304744	NW_005081653.1	1833754	1865244	+	3	Genome	Chr2
TIAM2	640.766	-0.23895	0.0442923	29.103	6.8631e-08	3.81851e-07	NW_005081596.1	3225316	3361785	+	3	Genome	Chr2
TMEM151B	5974.44	-0.449795	0.0262053	293.755	7.55807e-66	1.12939e-63	NW_005081620.1	579364	591779	-	3	Genome	Chr2
TMEM18	187.037	-0.936799	0.101579	84.3675	4.10849e-20	7.53944e-19	NW_005081609.1	410462	413193	+	3	Genome	Chr2
TMEM181	1424.72	0.210358	0.0398485	27.8338	1.32198e-07	7.01925e-07	NW_005081632.1	512091	534209	+	3	Genome	Chr2
TMEM206	201.35	-0.321189	0.0840868	14.5615	0.00013566	0.000444828	NW_005081548.1	3734601	3753669	+	3	Genome	Chr2
TMEM63A	122.686	-0.42549	0.11749	13.0347	0.000305768	0.000957585	NW_005081602.1	1199773	1234293	+	3	Genome	Chr2
TMX4	570.567	-0.874852	0.0642087	184.242	5.74411e-42	3.16228e-40	NW_005081577.1	4663759	4675633	-	3	Genome	Chr2
TNFRSF21	4140.02	-0.262252	0.0284642	84.7842	3.32776e-20	6.3288e-19	NW_005081561.1	2663536	2698639	-	3	Genome	Chr2
TOMM20	517.423	-0.203585	0.0634257	10.2739	0.00134929	0.00375741	NW_005081589.1	3013070	3017291	+	3	Genome	Chr2
TP53I3	990.915	-0.266819	0.0446796	35.6134	2.40628e-09	1.5731e-08	NW_005081561.1	3729304	3736140	+	3	Genome	Chr2
TRAF3IP2	28.8313	-1.14428	0.208103	30.5357	3.27775e-08	1.89421e-07	NW_005081561.1	516055	549080	+	3	Genome	Chr2
TRAF5	121.424	-0.291257	0.123229	5.53966	0.0185902	0.0389686	NW_005081548.1	4119359	4142453	-	3	Genome	Chr2
TRAPPC12	259.437	-0.421126	0.0838838	25.1035	5.43331e-07	2.64337e-06	NW_005081582.1	3796169	3847459	-	3	Genome	Chr2
TRAPPC3L	4.37042	-5.18275	1.13052	18.9518	1.34062e-05	5.21297e-05	NW_005081642.1	429188	446676	+	3	Genome	Chr2
TRIB2	204.047	-0.198603	0.084263	5.54362	0.0185482	0.0389586	NW_005081621.1	2596178	2616950	-	3	Genome	Chr2
TRIM67	412.025	-0.251827	0.0693846	13.1309	0.000290461	0.000912378	NW_005081653.1	1111328	1151559	+	3	Genome	Chr2
TRNAS-AGA	127.806	-0.793698	0.109689	52.2014	5.00906e-13	4.85136e-12	NA	NA	NA	NA	NA	NA	NA
TSNAX	174.76	-0.257142	0.098099	6.83978	0.00891498	0.0207685	NW_005081653.1	70648	94513	-	3	Genome	Chr2
TTBK1	813.089	-0.114163	0.0403234	8.01375	0.00464234	0.0114385	NW_005081577.1	309162	398263	-	3	Genome	Chr2
TTC27	162.5	0.50961	0.127055	15.8379	6.90073e-05	0.000235888	NW_005081574.1	4283989	4395882	-	3	Genome	Chr2
TTK	23.5424	-1.87744	0.443736	15.1964	9.68904e-05	0.000324831	NW_005081569.1	1266939	1295690	+	3	Genome	Chr2
TULP4	710.488	0.146867	0.051283	8.19003	0.00421212	0.0104902	NW_005081632.1	334163	480723	+	3	Genome	Chr2
UBE2J1	253.977	-0.320654	0.0994046	10.3151	0.00131945	0.00369024	NW_005081553.1	4387513	4414326	-	3	Genome	Chr2
UBXN2A	57.8963	0.347714	0.144228	5.8032	0.015997	0.0345721	NW_005081561.1	3883820	3901870	-	3	Genome	Chr2
UGP2	855.427	-0.217735	0.0418801	27.0174	2.01633e-07	1.02882e-06	NW_005081615.1	1443550	1459315	+	3	Genome	Chr2
URB2	99.7167	-0.546183	0.118356	21.2435	4.04484e-06	1.69236e-05	NW_005081653.1	550298	569557	+	3	Genome	Chr2
USH2A	102.375	-1.0794	0.121552	78.829	6.77264e-19	1.14261e-17	NW_005081548.1	2099514	2476250	+	3	Genome	Chr2
USP34	518.214	-0.12452	0.0513698	5.8723	0.015381	0.0333095	NW_005081577.1	3816648	3922400	-	3	Genome	Chr2
UST	109.618	-0.677015	0.126547	28.4076	9.82762e-08	5.35401e-07	NW_005081589.1	91739	188548	+	3	Genome	Chr2
VGLL2	7.23997	3.90112	1.00278	10.4757	0.00120954	0.00340103	NW_005081642.1	200871	204697	-	3	Genome	Chr2
VIP	702.584	-1.4928	0.11686	156.137	7.90136e-36	3.17878e-34	NW_005081596.1	2259483	2275404	+	3	Genome	Chr2
VSNL1	3706.14	-0.104125	0.0285579	13.2869	0.000267269	0.000842057	NW_005081621.1	243807	331990	-	3	Genome	Chr2
VTA1	589.487	0.282316	0.0443211	40.5905	1.87713e-10	1.3357e-09	NW_005081632.1	1512443	1551579	-	3	Genome	Chr2
WASF1	939.963	-0.12623	0.0431885	8.53546	0.00348293	0.00884257	NW_005081561.1	1241439	1272533	+	3	Genome	Chr2
WDR26	375.637	-0.172902	0.0656672	6.92093	0.00851926	0.0199801	NW_005081602.1	1585249	1616444	+	3	Genome	Chr2
WDR27	15.543	-2.11666	0.486501	16.341	5.29071e-05	0.000188234	NW_005081653.1	1648459	1738823	+	3	Genome	Chr2
WDR35	209.369	-0.433224	0.0750525	33.3453	7.71648e-09	4.776e-08	NW_005081561.1	6586970	6630001	+	3	Genome	Chr2
WDR92	83.9223	-1.06112	0.129057	67.7918	1.81708e-16	2.43675e-15	NW_005081615.1	3278980	3286065	-	3	Genome	Chr2
XDH	64.3339	-1.27929	0.504688	5.61699	0.0177872	0.0375867	NW_005081602.1	419911	529346	-	3	Genome	Chr2
XPO1	464.859	0.17712	0.0617229	8.21897	0.00414548	0.0103489	NW_005081577.1	3939745	3970208	-	3	Genome	Chr2
XPO5	326.222	0.164435	0.0672385	5.97251	0.0145306	0.0315988	NW_005081574.1	3774087	3803477	+	3	Genome	Chr2
YPEL5	3744.12	0.224749	0.0264838	71.9638	2.19181e-17	3.32265e-16	NW_005081742.1	301560	313956	-	3	Genome	Chr2
YWHAQ	950.34	-0.104701	0.0403008	6.74609	0.00939534	0.021599	NW_005081582.1	1167170	1188608	+	3	Genome	Chr2
ZBTB24	120.596	-0.244978	0.103631	5.57694	0.0181985	0.0383783	NW_005081561.1	1435631	1456419	+	3	Genome	Chr2
ZDHHC14	409.563	0.303004	0.0628541	23.205	1.45621e-06	6.61465e-06	NW_005081632.1	65211	105282	+	3	Genome	Chr2
ZFAND3	534.614	-0.300832	0.0483122	38.7749	4.75608e-10	3.25154e-09	NW_005081548.1	11862466	11910441	-	3	Genome	Chr2
ZUP1	61.8865	-0.393316	0.140766	7.79113	0.00525033	0.0128015	NW_005081642.1	395447	406175	+	3	Genome	Chr2

[truncated: 8 more sheets: Females_Hyp_2vs2m, Females_AMV_2vs2m, Nestling_Males_Hyp_2vs2m, Nestling_Males_AMV_2vs2m, Nestling_Females_Hyp_2vs2m, Nestling_Females_AMV_2vs2m, Males_Heart_2vs2m, Males_Liver_2vs2m]
